# Supplementary material for: Replacing sulfuric acid with water in electrochemical metal-free mild aromatic C–H amidation: a direct route to N -phenylamides
Source: Royal Society of Chemistry journal article supplement (doi:10.1039/d4qo01296h), 2024-01-01

## Supporting Information

### Replacing Sulfuric Acid with Water in Electrochemical Metal-Free Mild Aromatic C-H Amidation: a Direct Route to *N*-Phenylamides

Alexander I. Kononov,<sup>a,‡</sup> Sofia O. Strelakova\*,<sup>a,‡</sup> Vladimir I. Morozov,<sup>a</sup> Konstantin V. Boyko,<sup>b,c</sup> Vladimir I. Timashev,<sup>b,d</sup> Michael G. Medvedev\*,<sup>b,e</sup> Olga B. Bazanova<sup>a</sup> Ekaterina V. Kobeleva,<sup>a</sup> Kamil A. Ivshin<sup>a</sup>, Vasily M. Babaev<sup>a</sup> and Yulia H. Budnikova<sup>a</sup>

<sup>a</sup>Arbuzov Institute of Organic and Physical Chemistry, Kazan, 420088 Russia

<sup>b</sup>Zelinsky Institute of Organic Chemistry, Moscow, 119991, Russia

<sup>c</sup>Mendeleev University of Chemical Technology of Russia, Moscow, 125047 Russia

<sup>d</sup>Lomonosov Moscow State University, Moscow, 119991 Russia

<sup>e</sup>National Research University Higher School of Economics, Moscow, 101000 Russia

E-mail: [strelakova@iopc.ru](mailto:strelakova@iopc.ru), [medvedev.m.g@gmail.com](mailto:medvedev.m.g@gmail.com)

<sup>‡</sup> These authors contributed equally to this work

#### Table of Contents:

|                                                                                                  |      |
|--------------------------------------------------------------------------------------------------|------|
| 1. General Information                                                                           | S-2  |
| 1.1 Method                                                                                       |      |
| 1.2 Materials                                                                                    | S-2  |
| 1.3 NMR and Mass measurements                                                                    | S-2  |
| 2. Synthesis                                                                                     | S-4  |
| 2.1 Electrolysis setup                                                                           |      |
| 2.2 General electrolysis procedure                                                               | S-4  |
| 2.3. Gram scale synthesis                                                                        | S-5  |
| 2.4 Paired electrosynthesis experiment                                                           | S-5  |
| 2.5 Kinetic isotope effect experiment                                                            | S-6  |
| 3. ESR experiments                                                                               | S-8  |
| 4. Cyclic voltammetry                                                                            | S-10 |
| 4.1 Electrochemical potentials                                                                   | S-10 |
| 4.2 Cyclic voltammograms                                                                         | S-11 |
| 5. Quantum chemical calculations                                                                 | S-14 |
| 5.1 General notes                                                                                |      |
| 5.2 Mechanism                                                                                    | S-14 |
| 6. X-ray crystallography                                                                         | S-17 |
| 7. Characterization of the products                                                              | S-20 |
| 8. References                                                                                    | S-52 |
| 9. Copies of <sup>1</sup> H NMR, <sup>13</sup> C NMR and <sup>19</sup> F NMR Spectra of Products | S-56 |

## 1. General Information

### 1.1 Method

Preparative electrolysis was performed in galvanostatic mode with simultaneous control of the working electrode potential in thermostatically controlled, cylindrical 30 mL cell with separate anodic and cathodic compartments using a B5-49 direct current source at a current of 35 mA. A ceramic plate with the pore size 900 nm was used as a membrane. The potential of the working electrode was detected by a V7-27 DC voltmeter using Ag/AgCl as a reference electrode. The platinum cylindrical anode with a surface area of 20 cm<sup>2</sup> was used as a working electrode and the platinum rod (10 cm<sup>2</sup>) was used as the cathode. The distance between two Pt electrodes is 1.5 cm. The catholyte was a saturated solution of the PyHBF<sub>4</sub> in the RCN (R = Me, Et). During electrolysis, the electrolyte was stirred using a magnetic stirrer. Preparative chromatography BUCHI system including Pump Module C-601, ELS Detector C-605, Fraction Collector C-660, Control Unit C-620, Sepacore Control Package and software program were used for products isolation.

### 1.2 Materials

Chemicals were obtained from commercial sources and used without further purification: 1,4-Bis(trifluoromethyl)benzene (Sigma Aldrich, 98%), 1,3-Bis(trifluoromethyl)benzene (Sigma Aldrich, 98%), 1,3,5-Tris(trifluoromethyl)benzene (Sigma Aldrich, 97%), Benzotrifluoride (Sigma Aldrich, ≥99%), Chlorobenzene (Sigma Aldrich, ≥99%), Fluorobenzene (Sigma Aldrich, 99%), Nitrobenzene (Sigma Aldrich, ≥99%), Benzene (Sigma Aldrich, ≥99%), Benzotrifluoride (Sigma Aldrich, 99+%), 1,2-Dichlorobenzene (Sigma Aldrich, anhydrous, 99%), 1-Chloro-4-nitrobenzene (Sigma Aldrich, 99%), 1-Chloro-2-nitrobenzene (Sigma Aldrich, 99%), 1-Fluoro-4-nitrobenzene (Sigma Aldrich, 99%), 1-Bromo-4-nitrobenzene (Sigma Aldrich, 99%), 4-Chloro-1-(trifluoromethyl)benzene (Sigma Aldrich, 99%), 1-Bromo-4-fluorobenzene (Sigma Aldrich, 99%), 1-Chloro-4-fluorobenzene (Sigma Aldrich, 99%), Ethyl benzoate (Sigma Aldrich, 99%), Dimethyl isophthalate (Sigma Aldrich, 99%), Phenol (Acros Organics, 99+%), 2,6-Dimethylphenol (Acros Organics, 99%), 2-Methylphenol (Acros Organics, 99%), Acetonitrile (Acros Organics, CHROMASOLV® Plus, ≥99.9%, «extra pure»), Propionitrile (Sigma Aldrich, 99%), Butyronitrile (Sigma Aldrich, 99%). Methyl salicylate and Ethyl salicylate were obtained by the known method.<sup>1</sup>

### 1.3 NMR and Mass measurements

NMR measurements were performed in the NMR department (A.E. Arbusov Institute Organic and Physical Chemistry) of the Federal Collective Spectral Analysis Center for physical and

chemical studies on the structure, properties, and composition of matter and materials. NMR experiments were conducted using Bruker spectrometers AVANCE-400 (399.85 MHz ( $^1\text{H}$ ), 100.6 MHz ( $^{13}\text{C}$ ), 376 MHz ( $^{19}\text{F}$ )), AVANCE-600 (600.1 MHz ( $^1\text{H}$ ), 150.9 MHz ( $^{13}\text{C}$ )) and AVANCE-500 (500.13 MHz ( $^1\text{H}$ ), 125.77 MHz ( $^{13}\text{C}$ )) equipped with a pulsed gradient unit capable of producing magnetic field pulse gradients in the z-direction of 53.5 G/cm. All spectra were acquired in a 5 mm gradient inverse broad band probe head. As a result, chemical shifts were reported on the  $\delta$  (ppm) scale relative to the residual  $^1\text{H}$  and  $^{13}\text{C}$   $\text{CDCl}_3$  and  $\text{CD}_3\text{CN}$  signal resulting in external NMR spectra. The  $^1\text{H}$  and  $^{13}\text{C}$  NMR spectra of synthesized compounds were completely assigned by using a combination of 2D NMR experiments, which included  $^1\text{H}$ - $^1\text{H}$  COSY,  $^1\text{H}$ - $^{13}\text{C}$  HSQC and  $^1\text{H}$ - $^{13}\text{C}$  HMBC sequences.

Mass spectrometric studies (electrospray ionization) of the samples was carried out on a Bruker Daltonik GmbH AmazonX (Germany). Nitrogen was used as a drying gas in the source with a temperature of 220°C. The source voltage was 4.5 kV. Solutions of the samples were diluted with acetonitrile to a concentration of  $\sim 10\text{--}3$  mg  $\text{mL}^{-1}$ . The samples were injected using an autosampler of an Agilent 1260 Infinity liquid chromatograph (Agilent Technologies, USA).

*HPLC-MS experiment.* Samples were analysed using an Impact II mass spectrometer with an Elute UHPLC system («Bruker Daltonik GmbH», Germany). The column used was a YMC-Triart C18 (50 $\times$ 2.0 mm; 3  $\mu\text{m}$ ). The temperature of the column thermostat was set at 40°C, and the temperature of the autosampler at 12°C. Elution solvents used were Milli-Q water + 0.1% FA (A) and HPLC-grade acetonitrile + 0.1% FA (B) and elution gradient was the following: 0 min at 5% B, 3 min at 95% B, 4 min at 95% B, 4.1 min at 5% B, 6 min at 5% B with a flow rate of 0.3 mL/min. The injection volume was 2  $\mu\text{L}$ . Analytes were ionized by electrospray in positive polarity. ESI conditions were set with the capillary temperature at 220 °C, capillary voltage at 4.5 kV, and a sheath gas flow rate of 6 L/min. Measurements were made in the range  $m/z$  50-1900. The solution of analyte (1 mg/mL, HPLC acetonitrile) was diluted in acetonitrile:water (5%:95%) solvent mixture to a concentration of 0.005 mg/mL. The solution of sodium iodide in Milli-Q water at concentration 2 mg/mL was used as a calibrant. The relative error in determining the masses was no more than 3.0 ppm. For instrument control and data acquiring the otofControl software (Bruker Daltonik GmbH, Version 5.2) was used. Data processing was performed by DataAnalysis software (Bruker Daltonik GmbH, Version 5.3).

## 2. Synthesis

### 2.1 Electrolysis setup

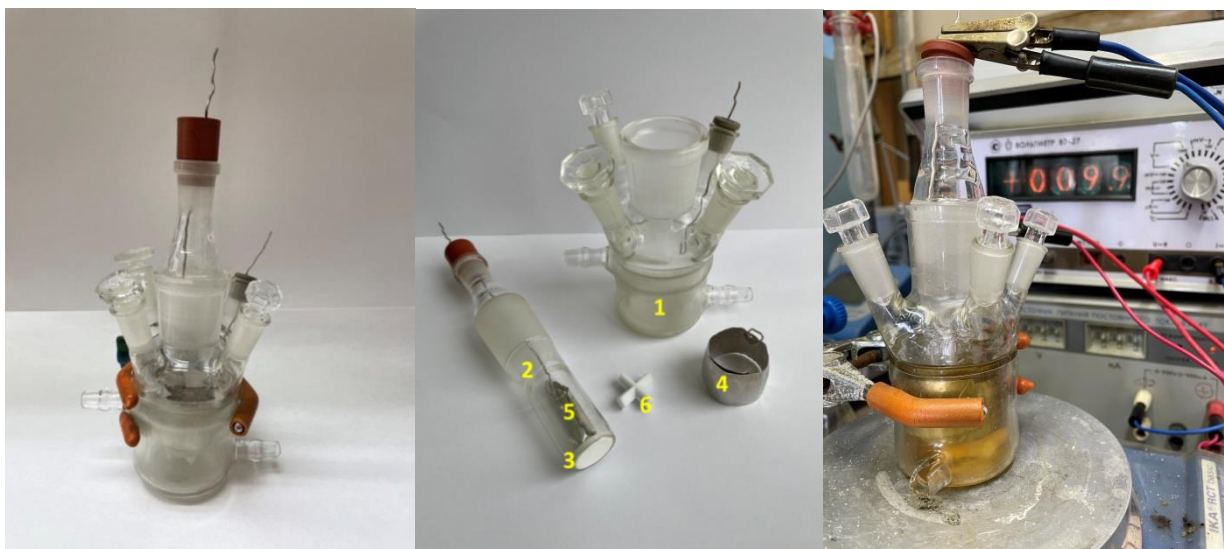

**Figure S1.** Electrolysis setup: cylindrical cell with divided anodic and cathodic compartments. **1** - anodic compartment; **2** - cathodic compartment; **3** - membrane: ceramic plate with the pore size of 900 nm; **4** – platinum cylindrical working electrode with a surface area of 20 cm<sup>2</sup> (anode); **5** - platinum rod (10 cm<sup>2</sup>) (cathode); **6** - stir bar. The cell can be thermostatted.

### 2.2 General electrolysis procedure

Arene (1.2 mmol), H<sub>2</sub>O (0.8 equiv., 0.96 mmol, 17  $\mu$ l) and nitrile (20 mL) as solvent were placed into anodic compartment **1** of the electrochemical divided cell equipped with a stir bar **6**. Saturated solution of PyHBF<sub>4</sub> (3.0 equiv., 3.6 mmol, 0.6 g) in nitrile was placed into cathodic compartment **2**. The electrolysis was carried out at room temperature (23-25 °C) and a constant current of 35 mA in air for the specified time. At the end of electrolysis as monitored by TLC, the solvent (nitrile) was evaporated on rotary evaporator to give the residue; nitrile was collected ( $\approx$ 16 ml). The distilled off nitrile can be reused in the following reactions. Then, chloroform ( $\approx$ 15 ml) was added to the residue to separate the supporting electrolyte by filtration, since PyHBF<sub>4</sub> is not soluble in chloroform. The mixture with product was filtered and chloroform was evaporated to give the crude product. The crude product was further purified by silica gel (mesh size 230–400) column chromatography (ethyl acetate/hexane = 1:1 or 1:2).

The chloroform-insoluble pyridinium salt PyHBF<sub>4</sub> was collected after electrolysis and washed with ethanol to remove the gum. Recovered ( $\approx$  0.48 g) and purified salt can be used in the following synthesis.

### 2.3 Gram scale synthesis

1,4-Bis(trifluoromethyl)benzene **1a** (4.6 mmol, 0.745 mL), MeCN (30 mL), PyHBF<sub>4</sub> (1.1 equiv., 5 mmol, 0.84 g) in acetonitrile were placed in the cylindrical divided cell (as described in 2.2) and the solution was electrolyzed at a constant current of 60 mA at room temperature for 4 h. After the reaction was terminated, the solvent was evaporated to give the residue. Then chloroform (≈20 ml) was added to the residue to separate the supporting electrolyte by filtration. The mixture with product was filtered and chloroform was evaporated to give the crude product. The procedure was repeated at least 3 times. Then the crude product was purified by silica gel (230-400 mesh) column chromatography (ethyl acetate/hexane = 1:1).

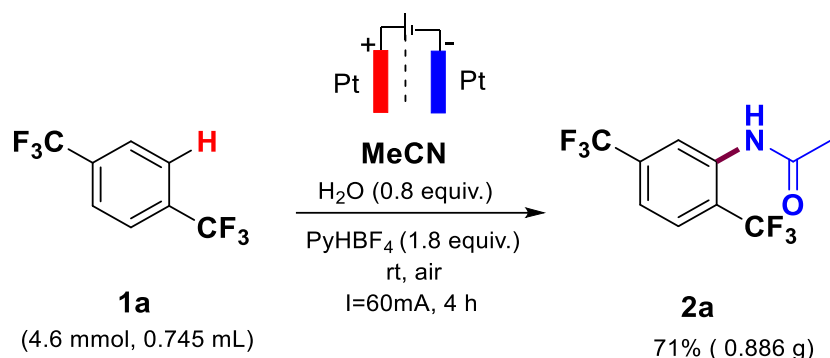

The anilide **2a** was obtained in 71% yield as a white solid.

### 2.4 Paired electrosynthesis experiment

**Oxidation process:** 1-Chloro-4-nitrobenzene (**1o**) (1.8 mmol, 0.285 g), H<sub>2</sub>O (0.8 equiv., 1.44 mmol, 33  $\mu$ l), Et<sub>4</sub>NBF<sub>4</sub> (2.4 mmol, 0.53 g) as background salt and acetonitrile (30 mL) as solvent were placed into anodic compartment **1** of the electrochemical divided cell equipped with a stir bar **6**. The electrolysis was carried out at room temperature (23-25 °C) and a constant current of 35 mA for 6 hours. At the end of electrolysis, as monitored by TLC, acetonitrile was evaporated on rotary evaporator to give the residue. Ethanol (≈7 mL) was then added to the residue, since Et<sub>4</sub>NBF<sub>4</sub> is very poorly soluble in ethanol and, therefore, the supporting electrolyte can be separated from the reaction mixture. The mixture with product was filtered and ethanol was evaporated to give the crude product. The crude product was further purified by silica gel (mesh size 230–400) column chromatography (ethyl acetate/hexane = 1:1) to give **2oa** in 74% as a yellow solid.

**Reduction process:** 1-Chloro-4-nitrobenzene (**1o**) (0.6 mmol, 0.095 g), Et<sub>4</sub>NBF<sub>4</sub> (0.8 mmol, 0.12 g) as background salt and acetonitrile (7 mL) as solvent were placed into cathodic compartment **2** of the electrochemical divided cell. The electrolysis was carried out at room temperature (23-25 °C) and a constant current of 35 mA for 3 hours. Note that due to different

volumes of the cathodic and anodic compartments and different substrate loadings, the synthesis was stopped after 3 hours to remove the reaction mixture from the cathodic compartment and replace it with a saturated solution of  $\text{Et}_4\text{NBF}_4$  in acetonitrile to continue the oxidation synthesis, which required more time (6 hours). At the end of electrolysis, as monitored by TLC, acetonitrile was evaporated on rotary evaporator to give the residue. Ethanol ( $\approx 3$  mL) was then added to the residue. The mixture with product was filtered and ethanol was evaporated to give the crude product. The crude product was further purified by silica gel (mesh size 230–400) column chromatography (ethyl acetate/hexane = 1:1) to give **10a** in 83% as a white solid. We also recorded the formation of 3-aminocrotononitrile occurring during the reduction of acetonitrile.

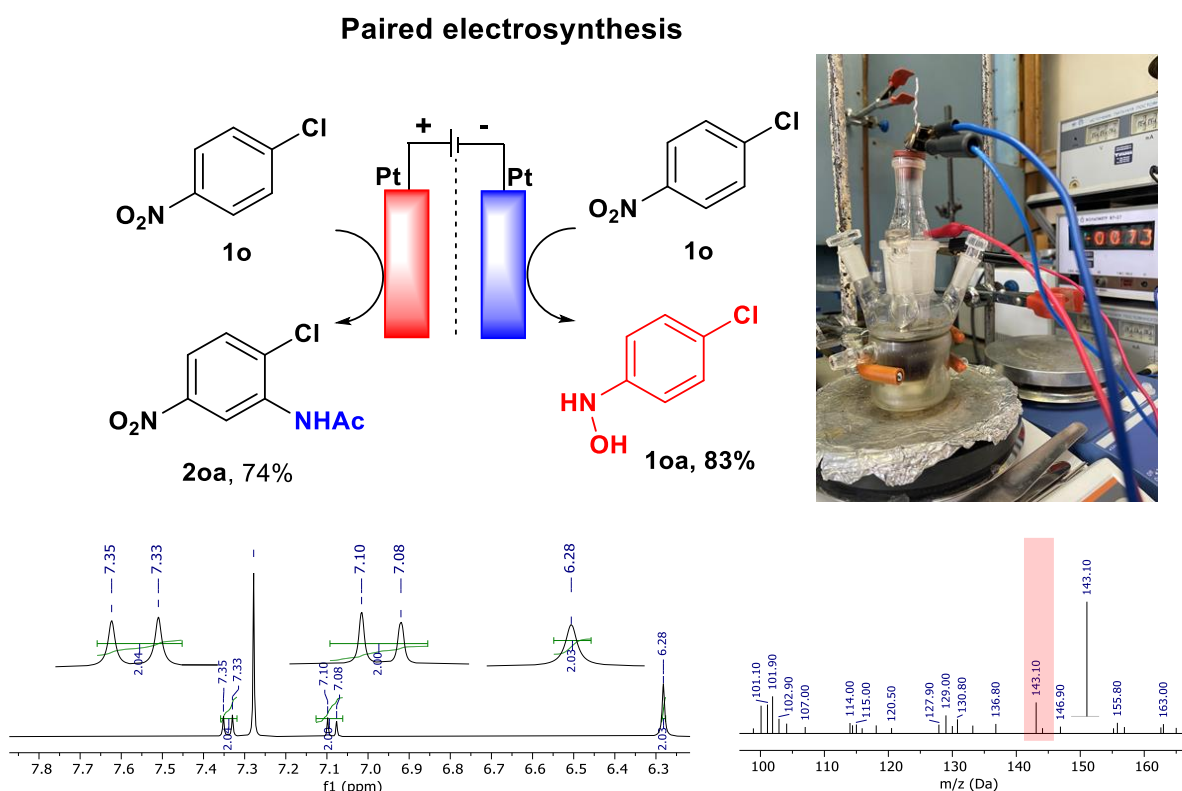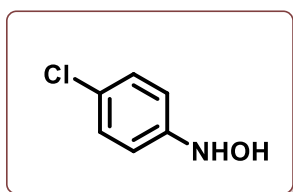

*N*-(4-chlorophenyl)hydroxylamine (**10a**). Yield: 83%, 0.07 g. White solid.  $^1\text{H}$  NMR (400 MHz,  $\text{CDCl}_3$ ):  $\delta_{\text{H}} = 7.35 - 7.33$  (d,  $J = 8.6$  Hz, 2H),  $7.10 - 7.08$  (d,  $J = 8.6$  Hz, 2H),  $6.28$  (s, 2H). MS (ESI)  $m/z$ : calcd for  $\text{C}_6\text{H}_6\text{ClNO}$   $[\text{M}]^+$ : 143.01; found: 143.10.

## 2.5 Kinetic isotope effect experiment

To gain additional mechanistic insight a KIE experiment with one equimolar mixture of benzene and  $\text{d}_6$ -benzene was conducted (Scheme S1).

Benzene (0.6 mmol, 55  $\mu\text{l}$ ), Benzene- $\text{d}_6$  (0.6 mmol, 53  $\mu\text{l}$ ),  $\text{H}_2\text{O}$  (0.8 equiv., 0.96 mmol, 17  $\mu\text{l}$ ) and nitrile (20 mL) as solvent, were placed into anodic compartment **1** of the electrochemical

divided cell equipped with a stir bar **6** (Figure S1). Saturated solution of PyHBF<sub>4</sub> (3.0 equiv., 3.6 mmol, 0.6 g) in MeCN was placed into cathodic compartment **2**. The electrolysis was carried out at room temperature (23–25 °C) and a constant current of 35 mA in air. The experiment was carried out for 2.5 hours. Then, chloroform (≈15 ml) was added to the residue to separate the supporting electrolyte by filtration. The mixture with products was filtered and chloroform was evaporated to give the crude products. The crude products was further purified by silica gel (mesh size 230–400) column chromatography (ethyl acetate/hexane = 1:1). The ratio of KH/KD is 1:1 indicating that C–H cleavage is not the rate-determining step.

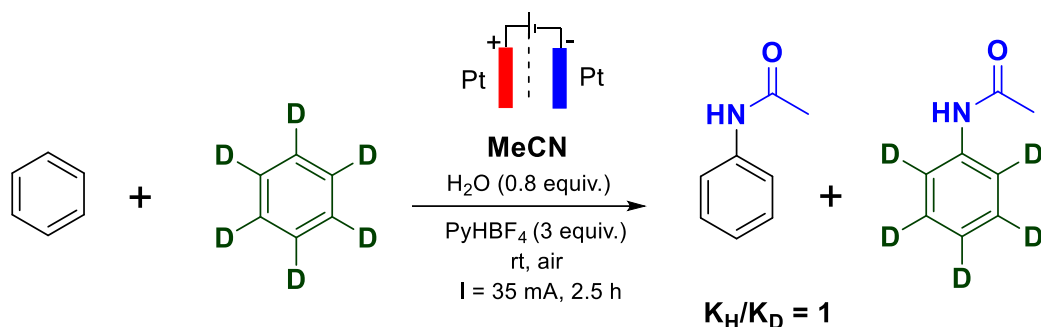

**Scheme S1** Kinetic Isotope Effect Experiment

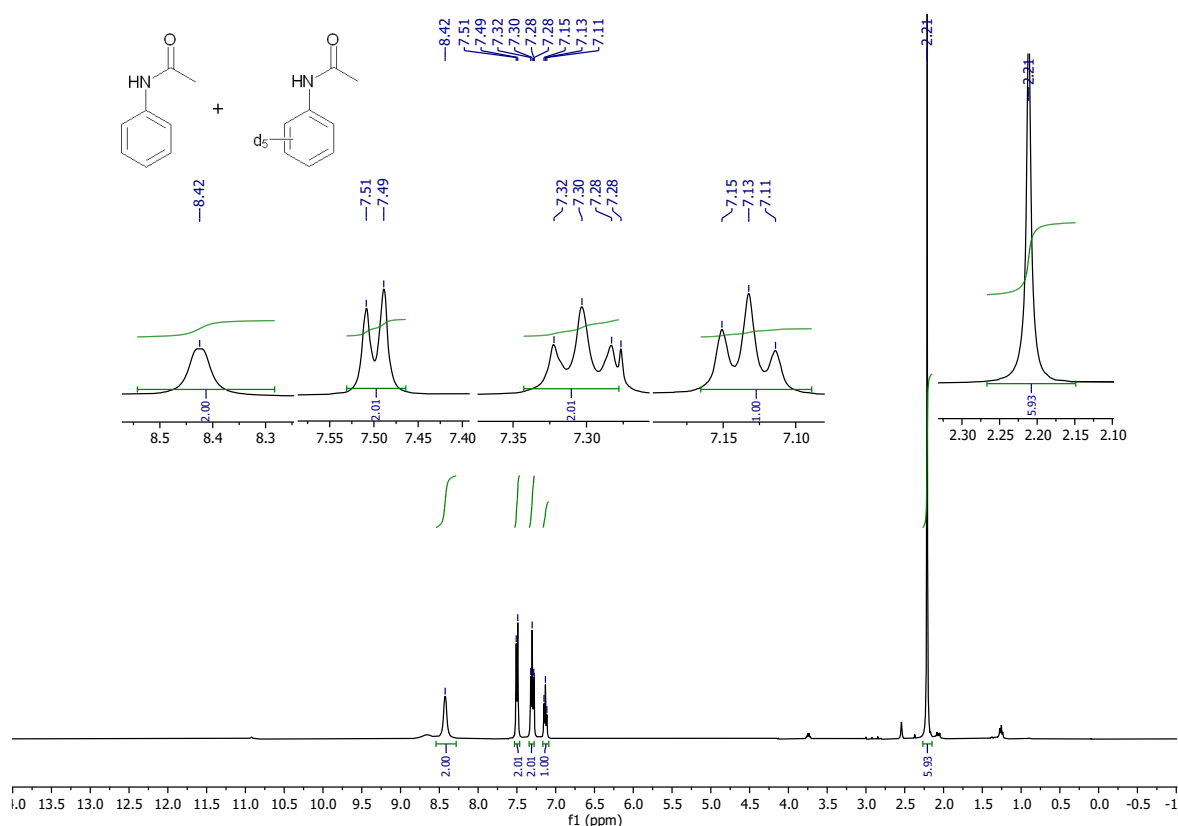

### 3. EPR experiments

The measurements were carried out on an apparatus program complex including an analog electrochemical system with a potentiostat and a PWR-3 programmer, an ELESYS E500 ESR spectrometer of the X-range, and an E14-440 analog-to-digital and digital-to-analog modulus (LCard), a fourth-generation computer, and a unique three-electrode helical cell. ESR spectra were simulated using the WinSim 0.96 program (developed by NIEHS). The material of the auxiliary electrode was platinum, the reference electrode was Pt wire, and the working electrode was platinum. Electrochemical experiments were carried out at 293 K using 0.1 M Et<sub>4</sub>NBF<sub>4</sub> as a supporting electrolyte; the potential sweep E(t) being 0.1 V s<sup>-1</sup>.

**Table S1** Values of *g* and hyperfine coupling constants (*a*<sub>iso</sub>) of PBN spin-adduct radicals

| Spin-adduct | <i>g</i> | <i>a</i> <sub>iso</sub>                                                                                                               | Line width, G |
|-------------|----------|---------------------------------------------------------------------------------------------------------------------------------------|---------------|
| <b>A</b>    | 2.001    | <i>a</i> <sub>N</sub> = 13.9 G, <i>a</i> <sub>H</sub> = 2.3 G                                                                         | 1.2           |
| <b>B</b>    | 2.009    | <i>a</i> <sub>N1</sub> = 5.19 G, <i>a</i> <sub>N2</sub> = 4.36 G,<br><i>a</i> <sub>H1</sub> = 5.25 G, <i>a</i> <sub>H2</sub> = 9.20 G | 1.5           |
| <b>C</b>    | 2.006    | <i>a</i> <sub>N1</sub> = 5.24 G, <i>a</i> <sub>N2</sub> = 4.32 G,<br><i>a</i> <sub>H1</sub> = 5.15 G, <i>a</i> <sub>H2</sub> = 9.24 G | 1.5           |

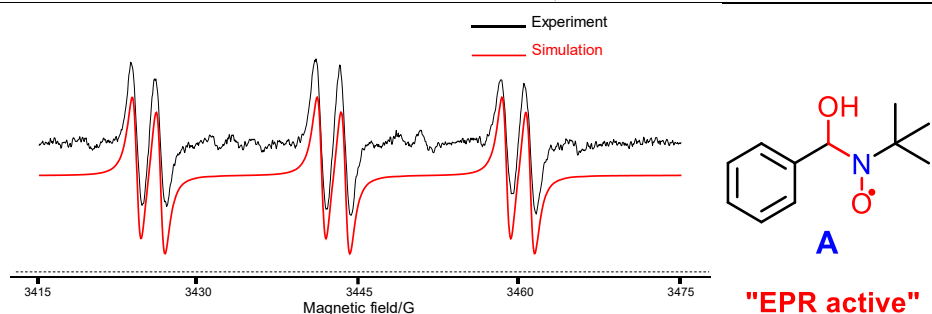

**Figure S2** EPR spectrum of PBN-OH<sup>•</sup> recorded during oxidation of solution of MeCN (2 ml) with water (100  $\mu$ l) at +2.2 V and 293 K with simulations. *g* = 2.001, *a*<sub>N</sub> = 13.9 G, *a*<sub>H</sub> = 2.3 G. C (PBN) = 0.5 mg/ml.

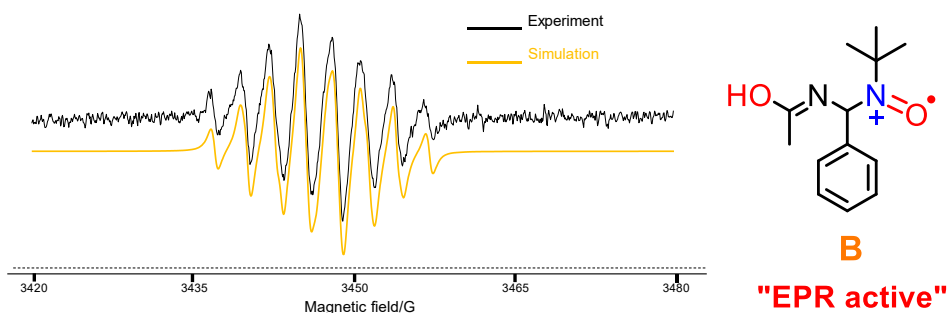

**Figure S3.** EPR spectrum of spin-adduct **B** recorded during oxidation of benzene solution in MeCN with water (0.8 equiv.) at +2.2 V and 293 K with simulations. *g* = 2.021, *a*<sub>N1</sub> = 5.2 G, *a*<sub>N2</sub> = 4.4 G, *a*<sub>H1</sub> = 5.3 G, *a*<sub>H2</sub> = 9.2 G. C (PBN) = 1.5 mg/ml.



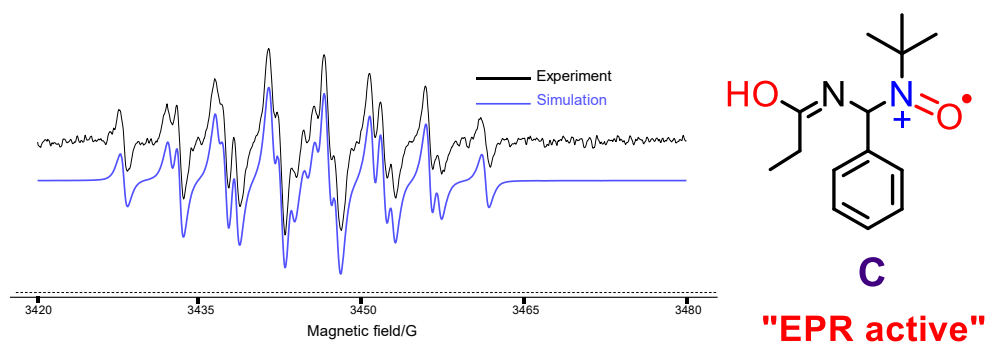

**Figure S4** EPR spectrum of spin-adduct **C** recorded during oxidation of benzene solution in EtCN with water (0.8 equiv.) at +2.2 V and 293 K with simulations.  $g = 2.021$ ,  $a_{N1} = 5.24$  G,  $a_{N2} = 4.32$  G,  $a_{H1} = 5.15$  G,  $a_{H2} = 9.24$  G. C (PBN) = 1.5 mg/ml.

### HRMS of spin-adduct **B**

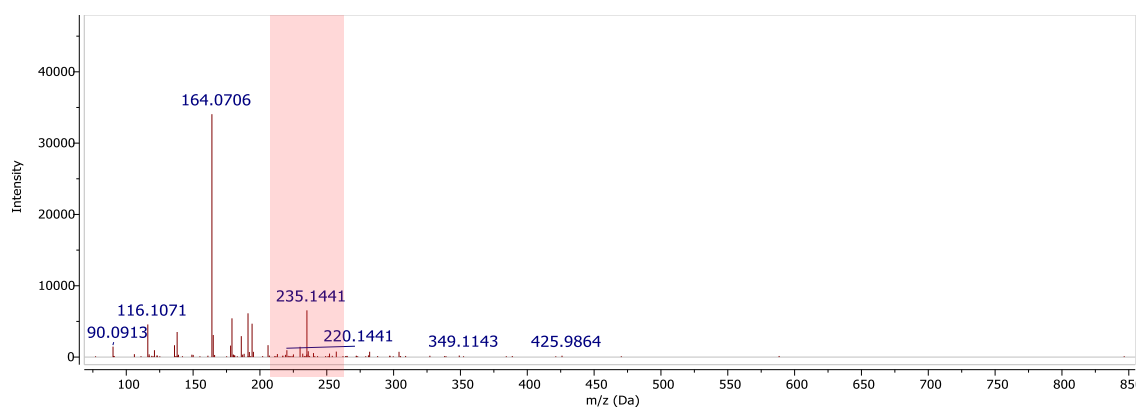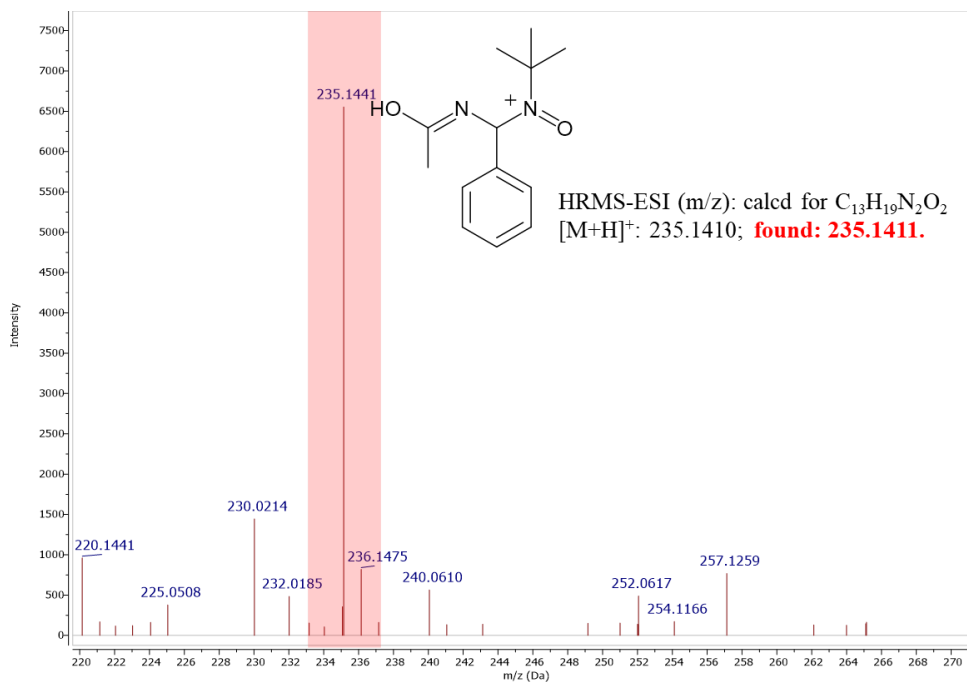

#### 4. Cyclic voltammetry

Cyclic voltammograms (CVs) have been recorded in MeCN solution in three-electrode cell with 5 mM substrate concentration, Bu<sub>4</sub>NBF<sub>4</sub> was used as a supporting electrolyte (0.1 M) and a glassy carbon electrode as a working electrode (6 mm<sup>2</sup>), auxiliary electrode was platinum rod. All potentials are referenced against the Ag/AgCl (0.01 M KCl) in MeCN. The reference electrode was connected with the cell solution by a modified Luggin capillary filled with the 0.1 M Bu<sub>4</sub>NBF<sub>4</sub> in MeCN electrolyte solution. Thus, the reference electrode assembly had two compartments, each terminated with an ultra-fine glass frit to separate the AgCl from the analyte. CVs were recorded using BASi Epsilon potentiostat (USA) and P-30S potentiostat Elins (Russia).

#### 4.1 Electrochemical potentials

**Table S2** Redox potentials (V) of arenes; (**a**) our results, conditions: WE- GC, RE – Ag/AgCl, Bu<sub>4</sub>NBF<sub>4</sub>, CH<sub>3</sub>CN; (**b**) literature data, conditions: WE- Pt, RE – Ag/AgNO<sub>3</sub>, perchlorate salts (LiClO<sub>4</sub>, NaClO<sub>4</sub>, (C<sub>2</sub>H<sub>5</sub>)<sub>4</sub>NClO<sub>4</sub>, (n-C<sub>8</sub>H<sub>7</sub>)<sub>4</sub>NClO<sub>4</sub>, (n-C<sub>4</sub>H<sub>9</sub>)<sub>4</sub>NClO<sub>4</sub>), CH<sub>3</sub>CN

| №         | Compound                            | E <sub>ox</sub> <sup>a</sup> , V | E <sub>ox</sub> <sup>b</sup> , V | Ref. |
|-----------|-------------------------------------|----------------------------------|----------------------------------|------|
| <b>1a</b> | 1,4-Bis(trifluoromethyl)benzene     | > 3.2                            |                                  |      |
| <b>1b</b> | 1,3-Bis(trifluoromethyl)benzene     | > 3.2                            |                                  |      |
| <b>1c</b> | 1,3,5-Tris(trifluoromethyl)benzene  | > 3.2                            |                                  |      |
| <b>1d</b> | Trifluoromethyl benzene             | > 3.2                            |                                  |      |
| <b>1e</b> | 4-Chloro-1-(trifluoromethyl)benzene | > 3.2                            |                                  |      |
| <b>1f</b> | Fluorobenzene                       | > 3.2                            |                                  |      |
| <b>1g</b> | Chlorobenzene                       | 2.63                             | 2.07                             | [2]  |
| <b>1h</b> | 1,2-Chlorobenzene                   | 2.75                             |                                  |      |
| <b>1i</b> | 1-Chloro-4-fluorobenzene            | 2.49                             |                                  |      |
| <b>1j</b> | 1-Bromo-4-fluorobenzene             | 2.46                             |                                  |      |
| <b>1k</b> | Benzene                             | 2.56                             | 2.08                             | [2]  |
| <b>1l</b> | Benzonitrile                        | 2.35                             | 1.8<br>vs SCE                    | [3]  |
| <b>1m</b> | Nitrobenzene                        | > 3.2                            |                                  |      |
| <b>1n</b> | 1-Chloro-2-nitrobenzene             | > 3.2                            |                                  |      |
| <b>1o</b> | 1-Chloro-4-nitrobenzene             | > 3.2                            |                                  |      |
| <b>1p</b> | 1-Fluoro-4-nitrobenzene             | > 3.2                            |                                  |      |
| <b>1q</b> | 1-Bromo-4-nitrobenzene              | > 3.2                            |                                  |      |

|           |                                                     |       |      |     |
|-----------|-----------------------------------------------------|-------|------|-----|
| <b>1r</b> | Ethyl benzoate                                      | > 3.2 |      |     |
| <b>1s</b> | Dimethyl isophthalate                               | > 3.2 |      |     |
| <b>1t</b> | Phenol                                              | 1.80  | 1.04 | [2] |
| <b>1u</b> | 2,6-Dimethylphenol                                  | 1.76  |      |     |
| <b>1v</b> | 2-Methylphenol                                      | 1.78  |      |     |
| <b>1w</b> | Methyl salicylate                                   | 1.85  |      |     |
| <b>1x</b> | Ethyl salicylate                                    | 2.16  |      |     |
| <b>2a</b> | <i>N</i> -(2,5-bis(trifluoromethyl)phenyl)acetamide | 2.45  |      |     |
| <b>2k</b> | Acetanilide                                         | 1.65  |      |     |
| <b>2t</b> | Paracetamol                                         | 1.32  |      |     |

## 4.2 Cyclic voltammograms

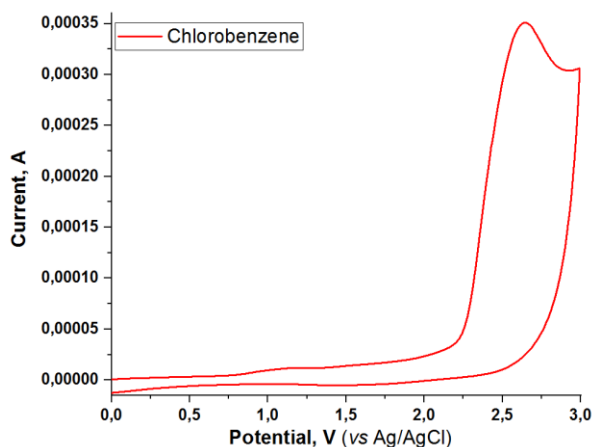

**Figure S2:** Oxidation of Chlorobenzene (**1g**)

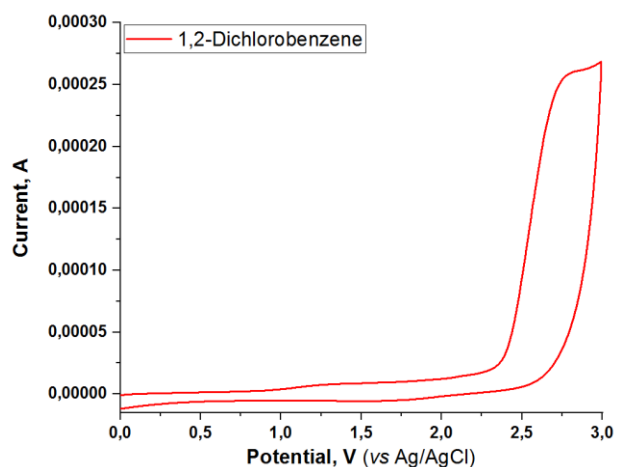

**Figure S3:** Oxidation of 1,2-Dichlorobenzene (**1h**)

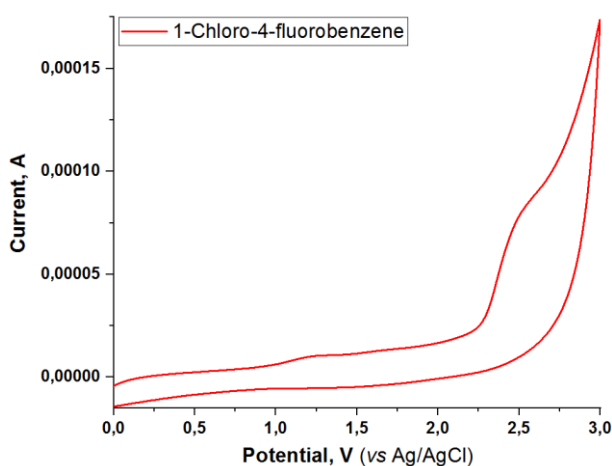

**Figure S4:** Oxidation of 1-Chloro-4-fluorobenzene (**1i**)

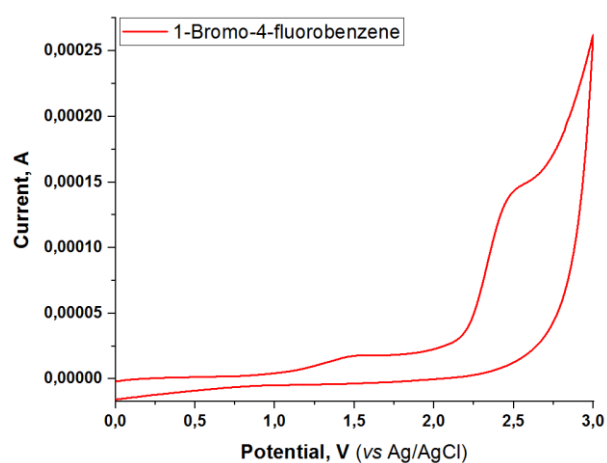

**Figure S5:** Oxidation of 1-Bromo-4-fluorobenzene (**1j**)

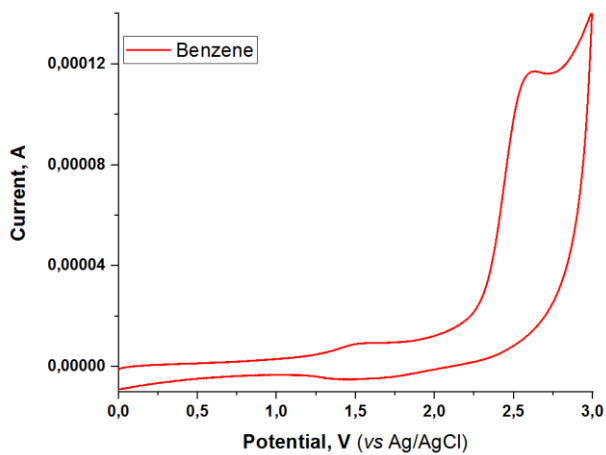

**Figure S6: Oxidation of Benzene (1k)**

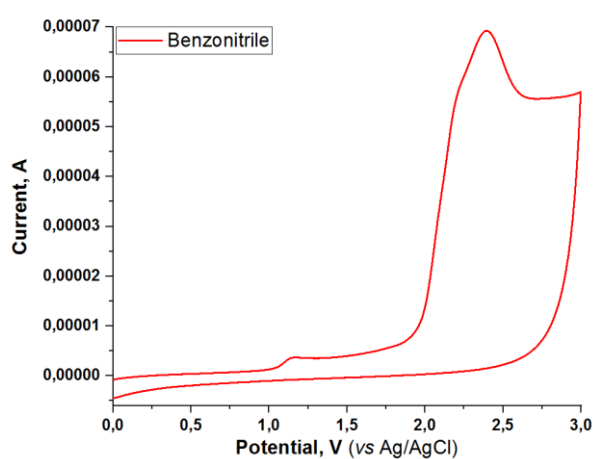

**Figure S7: Oxidation of Benzonitrile (1l)**

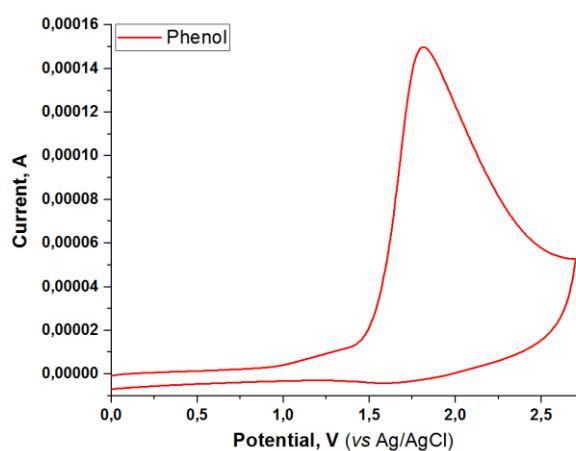

**Figure S8: Oxidation of Phenol (1t)**

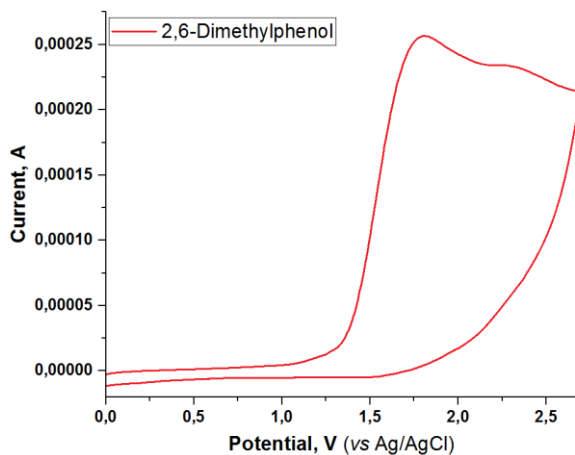

**Figure S9: Oxidation of 2,6-Dimethylphenol (1u)**

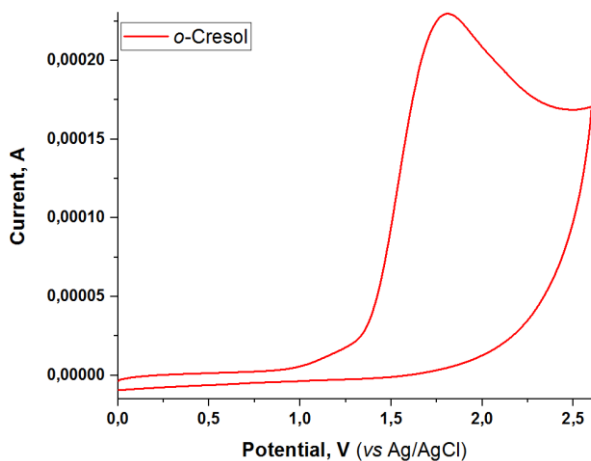

**Figure S10: Oxidation of 2-Methylphenol (1v)**

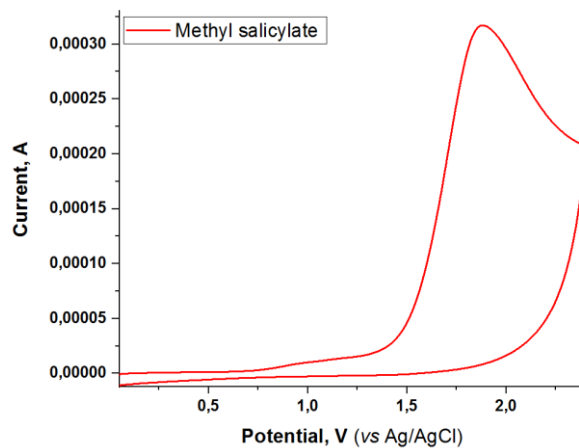

**Figure S11: Oxidation of Methyl salicylate (1w)**

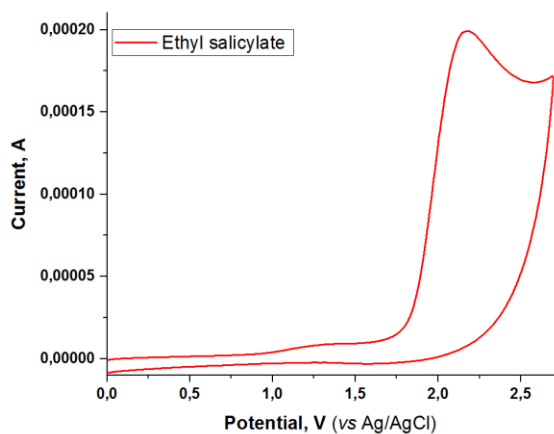

**Figure S12:** Oxidation of Ethyl salicylate (**1x**)

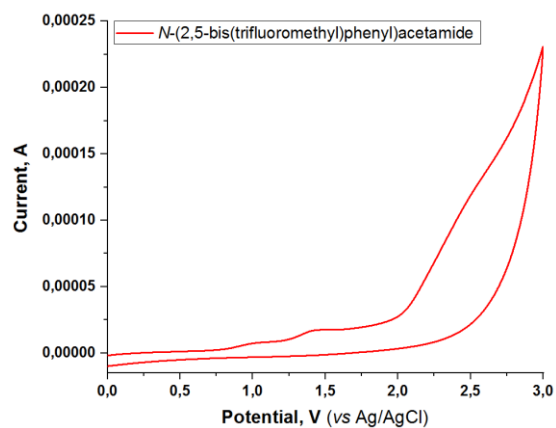

**Figure S13:** Oxidation of *N*-(2,5-bis(trifluoromethyl)phenyl)acetamide (**2a**)

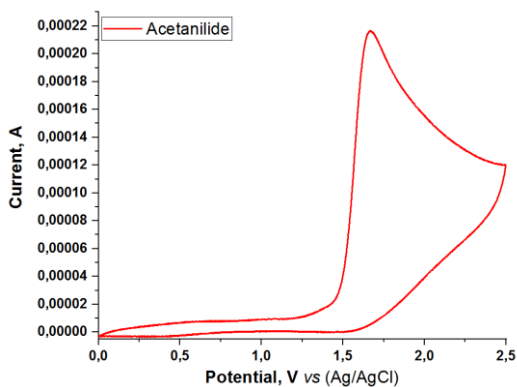

**Figure S14:** Oxidation of Acetanilide (**2k**)

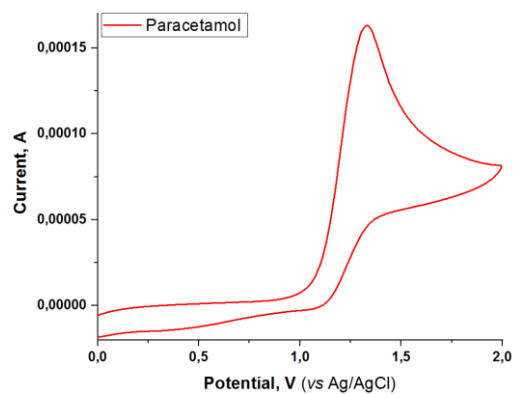

**Figure S15:** Oxidation of Paracetamol (**2t**)

## 5. Quantum chemical calculations

### 5.1 General notes

Conformational searches were performed for **TS1** and **TS2** using CREST (Conformer-Rotamer Ensemble Sampling Tool)<sup>4</sup> software with GFN2-xTB<sup>5</sup> method, implicit accounting for solvation effects (**alpb**<sup>6</sup>), and correct system charge and multiplicity. The following CREST controls were used to constrain the breaking/forming bond lengths, as proposed in<sup>7</sup>:

```
$constrain
distance: 15, 2, auto
force constant=2.0
$end
```

These conformational searches yielded 5 and 6 different conformers for **TS1** and **TS2**, respectively, from which the most stable ones (**TS1\_4** and **TS2\_0**) were selected.

The obtained conformers were optimized in ORCA 5.0.4 at the B3LYP<sup>8,9</sup>-D3BJ<sup>10,11</sup>/def2-TZVP/CPCM(CH<sub>3</sub>CN)<sup>12</sup> level of theory, and harmonic frequencies were calculated to ascertain the types of located stationary points and compute free energies corrections.

All transition-state optimizations were performed in two steps: (1) first, we minimized their energies with constraints fixing the changing bonds at their “partially formed lengths”: 1.4 Å for C...H, and 2.0 Å for C...C (we call this step “preoptimization”<sup>7</sup>); (2) the second step is an unconstrained transition-state search from the preoptimized structure.

To further refine the computed free energies, we have computed electronic energies of all located stationary points at DLPNO-CCSD(T)<sup>13</sup>/def2-TZVPP<sup>14</sup>/CPCM(CH<sub>3</sub>CN) level of theory and recalculated the free energies using the following formula:

$$G'_{CCSD(T)} = E_{CCSD(T)} + (G_{DFT} - E_{DFT}),$$

where  $G_{DFT}$  and  $E_{DFT}$  are the free and electronic energies obtained from DFT calculations;  $E_{CCSD(T)}$  is the electronic energy obtained from calculations of the same geometry by the coupled cluster method.

During the clarification of the mechanism, it was necessary to determine the presence of an energy barrier in the last reaction - detachment of a hydrogen radical from **I1** by an OH radical. For this purpose, a relaxed scan of the potential energy surface (“Scan” keyword in ORCA) was carried out.

### 5.2 Mechanism

**Scheme S2** shows the starting molecule **T2**, the **Product**, and all intermediate and transition states that were studied during the molecular modelling procedure. All the located structures

corresponding to stationary points on the PES, as well as their charges, multiplicities, total electronic energies ( $E_{\text{B3LYP}}$ ,  $E_{\text{CCSD(T)}}$ ), Gibbs free energies ( $G(298\text{K})_{\text{B3LYP}}$ ,  $G(298\text{K})_{\text{CCSD(T)}}$ ), imaginary frequency counts (NumImFreq), and perturbative triples (PT) are available in the file "[supplementary.xyz](#)".

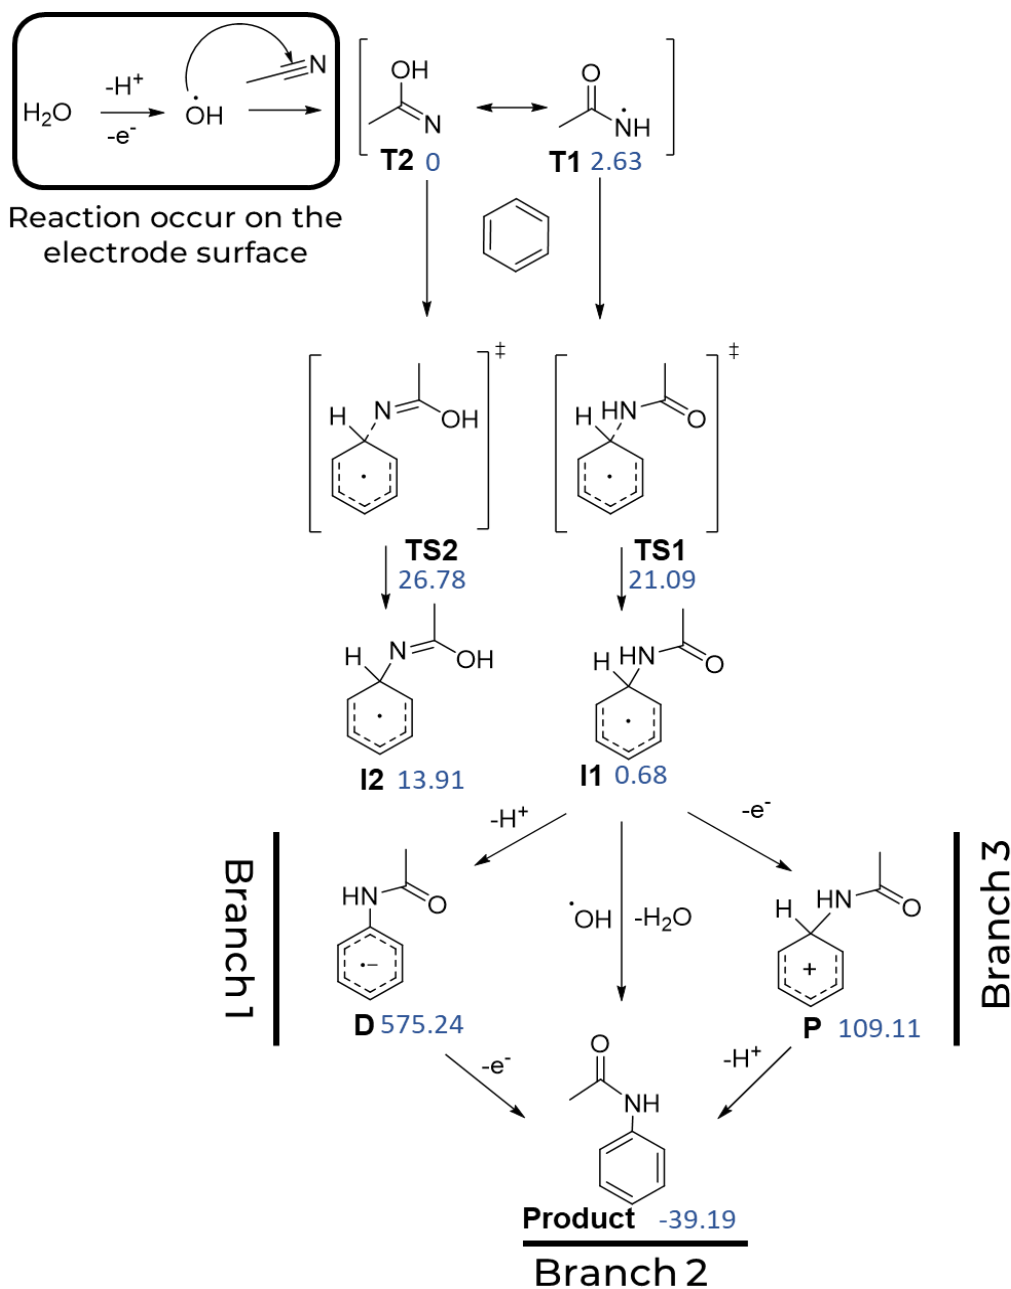

**Scheme S2** Detailed reaction mechanism showing the three pathways of reaction product formation from the **I1**. Numbers in blue show the energies in kcal/mol relative to the initial **T2** structure

After obtaining the intermediate **I1**, further transformations into the product are divided into three branches:

Branch 1: the solvated proton is cleaved from the intermediate compound **II** followed by oxidation on the anode. The energy of the acetonitrile-solvated proton was taken from the literature<sup>15</sup>.

Branch 2: cleavage of hydrogen atom by OH radical from **II** to form the target product and water. In order to prove that this reaction occurs without an energy barrier, a relaxed scan of the potential energy surface was performed, see Figure 6. The curve does not contain a maximum, indicating the absence of an energy barrier.

Branch 3: pre-oxidation of intermediate **II** followed by proton elimination.

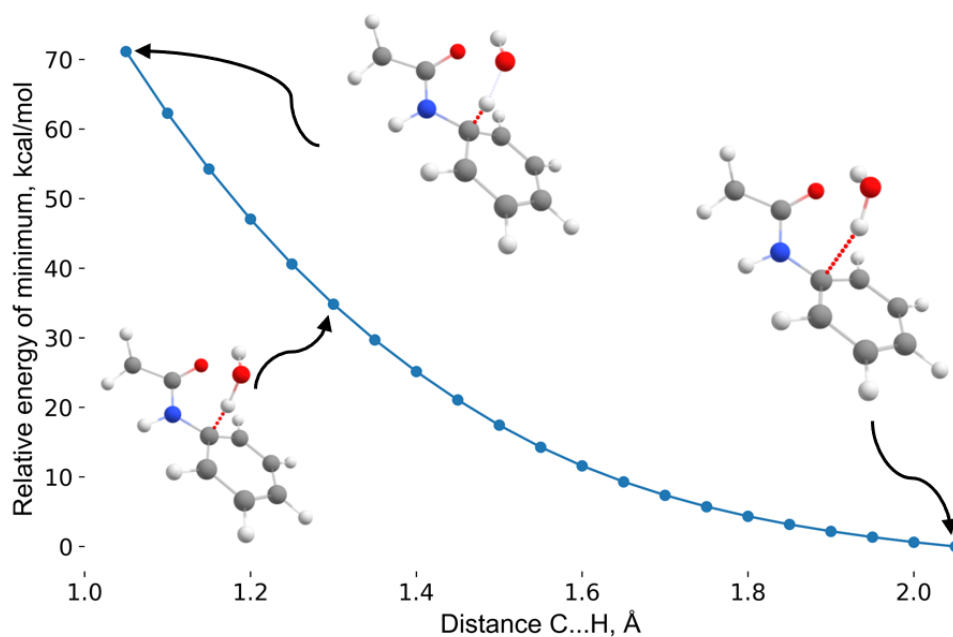

**Figure S16.** Relaxed scan of the potential energy surface along the distance between hydrogen atom and carbon atom of the benzene ring. Different elements are shown in different colors: red - oxygen, grey - carbon, white - hydrogen and blue - nitrogen.



## 6. X-ray crystallography

The X-ray diffraction data for the single crystals **2da** and **3o** were collected on a Bruker AXS D8 Venture diffractometer at 101(2) K in the  $\omega$  and  $\varphi$ -scan models using Mo radiation ( $\lambda = 0.71073\text{\AA}$ ). The structures were solved by direct methods using APEX3<sup>16</sup> for data collection, SAINT<sup>17</sup> for data reduction, SHELXT<sup>18</sup> for structure solution, SHELXL<sup>18</sup> for structure refinement by full-matrix least-squares against  $F^2$ , and SADABS<sup>19</sup> and TWINABS<sup>20</sup> for multi-scan absorption corrections for **2da** and **3o** respectively. All non-hydrogen atoms were refined anisotropically. Hydrogen atoms at carbon atoms were placed into calculated positions and refined as “riding” atoms. Crystal data and structure refinement data are presented in table 1 and table 2. CCDC 2336800, 2336823 contain the supplementary crystallographic data for this paper.

**Table S2** Crystal data and structure refinement for **2da**

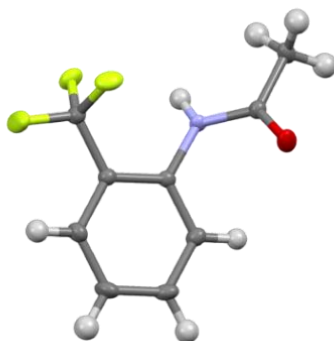

|                                                 |                                                 |               |
|-------------------------------------------------|-------------------------------------------------|---------------|
| <b>Identification code</b>                      | <b>bud_ks_a_57_fr8_16_0m</b>                    |               |
| <b>Empirical formula</b>                        | C <sub>9</sub> H <sub>8</sub> F <sub>3</sub> NO |               |
| <b>Formula weight (g/mol)</b>                   | 203.16                                          |               |
| <b>Temperature (K)</b>                          | 101(2)                                          |               |
| <b>Wavelength (Å)</b>                           | 0.71073                                         |               |
| <b>Crystal system, space group</b>              | Monoclinic, $P2_1/n$                            |               |
| <b>Unit cell dimensions (Å, deg)</b>            | a = 4.7728(4)                                   | a = 90        |
|                                                 | b = 13.3728(12)                                 | b = 92.480(3) |
|                                                 | c = 13.9438(13)                                 | g = 90        |
| <b>Volume (Å<sup>3</sup>)</b>                   | 889.14(14)                                      |               |
| <b>Z</b>                                        | 4                                               |               |
| <b>Density (calculated) (g/cm<sup>3</sup>)</b>  | 1.518                                           |               |
| <b>Absorption coefficient (mm<sup>-1</sup>)</b> | 0.142                                           |               |

|                                                                    |                                                                  |
|--------------------------------------------------------------------|------------------------------------------------------------------|
| <b>F(000)</b>                                                      | 416                                                              |
| <b>Crystal size (mm<sup>3</sup>)</b>                               | 0.454 x 0.194 x 0.140                                            |
| <b><math>\theta</math> range for data collection (deg)</b>         | 2.111 to 28.739                                                  |
| <b>Index ranges</b>                                                | $-6 \leq h \leq 6$ , $-18 \leq k \leq 18$ , $-18 \leq l \leq 18$ |
| <b>Reflections collected</b>                                       | 32558                                                            |
| <b>Independent reflections</b>                                     | 2312 [ $R_{\text{int}} = 0.0651$ ]                               |
| <b>Completeness to <math>\theta = 25.242^\circ</math></b>          | 99.9 %                                                           |
| <b>Absorption correction</b>                                       | multi-scan                                                       |
| <b>Max. and min. transmission</b>                                  | 0.7458 and 0.7012                                                |
| <b>Refinement method</b>                                           | Full-matrix least-squares on $F^2$                               |
| <b>Data / restraints / parameters</b>                              | 2312 / 1 / 132                                                   |
| <b>Goodness-of-fit on <math>F^2</math></b>                         | 1.059                                                            |
| <b>Final R indices [<math>I &gt; 2\sigma(I)</math>]</b>            | $R_1 = 0.0365$ , $wR_2 = 0.0845$                                 |
| <b>R indices (all data)</b>                                        | $R_1 = 0.0468$ , $wR_2 = 0.0895$                                 |
| <b>Largest diff. peak and hole (<math>e\text{\AA}^{-3}</math>)</b> | 0.353 and -0.286                                                 |

**Table S3** Crystal data and structure refinement for **3o**

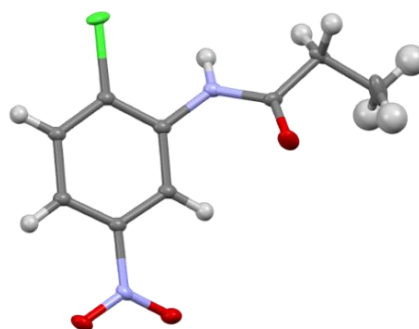

|                               |                     |
|-------------------------------|---------------------|
| <b>Identification code</b>    | <b>bud_ks_55_t5</b> |
| <b>Empirical formula</b>      | $C_9H_9ClN_2O_3$    |
| <b>Formula weight (g/mol)</b> | 228.63              |

|                                                      |                                                                                            |
|------------------------------------------------------|--------------------------------------------------------------------------------------------|
| <b>Temperature (K)</b>                               | 101(2)                                                                                     |
| <b>Wavelength (Å)</b>                                | 0.71073                                                                                    |
| <b>Crystal system, space group</b>                   | Monoclinic, $P2_1$                                                                         |
| <b>Unit cell dimensions (Å, deg)</b>                 | a = 5.8609(7)      a = 90<br>b = 4.8745(5)      b = 93.312(4)<br>c = 17.4671(18)    g = 90 |
| <b>Volume (Å<sup>3</sup>)</b>                        | 498.18(9) E <sup>3</sup>                                                                   |
| <b>Z</b>                                             | 2                                                                                          |
| <b>Density (calculated) (g/cm<sup>3</sup>)</b>       | 1.524                                                                                      |
| <b>Absorption coefficient (mm<sup>-1</sup>)</b>      | 0.371                                                                                      |
| <b>F(000)</b>                                        | 236                                                                                        |
| <b>Crystal size (mm<sup>3</sup>)</b>                 | 0.623 x 0.488 x 0.056                                                                      |
| <b>θ range for data collection (deg)</b>             | 3.482 to 28.806°.                                                                          |
| <b>Index ranges</b>                                  | -7 ≤ h ≤ 7, -6 ≤ k ≤ 6, -23 ≤ l ≤ 23                                                       |
| <b>Reflections collected</b>                         | 8089                                                                                       |
| <b>Independent reflections</b>                       | 5355 [R <sub>int</sub> = 0.0553]                                                           |
| <b>Completeness to θ = 25.242°</b>                   | 99.4 %                                                                                     |
| <b>Absorption correction</b>                         | multi-scan                                                                                 |
| <b>Max. and min. transmission</b>                    | 0.745757 and 0.570774                                                                      |
| <b>Refinement method</b>                             | Full-matrix least-squares on F <sup>2</sup>                                                |
| <b>Data / restraints / parameters</b>                | 2686 / 1 / 142                                                                             |
| <b>Goodness-of-fit on F<sup>2</sup></b>              | 1.055                                                                                      |
| <b>Final R indices [I &gt; 2σ(I)]</b>                | R <sub>1</sub> = 0.0529, wR <sub>2</sub> = 0.1403                                          |
| <b>R indices (all data)</b>                          | R <sub>1</sub> = 0.0560, wR <sub>2</sub> = 0.1426                                          |
| <b>Absolute structure parameter</b>                  | 0.07(12)                                                                                   |
| <b>Largest diff. peak and hole (eÅ<sup>-3</sup>)</b> | 0.602 and -0.637                                                                           |

## 7. Characterization of the products

### *N*-(2,5-bis(trifluoromethyl)phenyl)acetamide (**2a**)

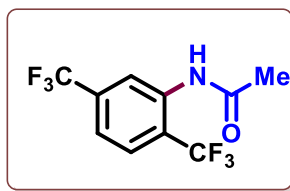

**Known compound.**<sup>21</sup> Yield: 87%, 0.28 g. White solid, mp 120-122 °C. <sup>1</sup>H NMR (400 MHz, CDCl<sub>3</sub>): δ<sub>H</sub> = 8.63 (s, 1H), 7.76 (d, *J* = 8.2 Hz, 1H), 7.50 (d, *J* = 8.4 Hz, 2H), 2.27 (s, 3H). <sup>13</sup>C NMR (100 MHz, CDCl<sub>3</sub>): δ<sub>C</sub> = 168.94, 136.60, 136.04, 135.71, 135.38, 135.05, 127.92, 127.60, 127.37, 127.32, 127.27, 127.21, 125.20, 124.88, 122.48, 122.16, 121.73, 121.50, 119.76, 119.45, 25.18. <sup>19</sup>F NMR (376 MHz, CDCl<sub>3</sub>): δ<sub>F</sub> = -61.21, -63.40. MS (ESI) *m/z*: [M+H]<sup>+</sup> 272.0. HRMS (ESI) *m/z* [M+H]<sup>+</sup>: calcd for C<sub>10</sub>H<sub>8</sub>F<sub>6</sub>NO, 272.0505; found, 272.0504.

### *N*-(2,6-bis(trifluoromethyl)phenyl)acetamide (**2b**)

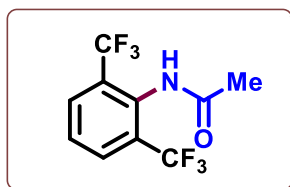

**Unknown compound.** Yield: 81%, 0.264 g. White solid, mp 118-122 °C. <sup>1</sup>H NMR (500 MHz, CDCl<sub>3</sub>): δ<sub>H</sub> = 7.92 (d, *J* = 8.03 Hz, 2H), 7.61 (t, *J* = 7.9 Hz, 1H), 7.22 (s, 1H), 2.21 (s, 3H). <sup>13</sup>C NMR (125 MHz, CDCl<sub>3</sub>): δ<sub>C</sub> = 170.02, 132.80, 131.26, 131.01, 130.77, 130.53, 130.00, 129.96, 129.92, 129.88, 128.24, 125.46, 123.29, 121.11, 118.93, 22.41. <sup>19</sup>F NMR (376 MHz, CDCl<sub>3</sub>): δ<sub>F</sub> = -61.47. MS (ESI) *m/z*: [M+H]<sup>+</sup> 272.0. HRMS (ESI) *m/z* [M+H]<sup>+</sup>: calcd for C<sub>10</sub>H<sub>8</sub>F<sub>6</sub>NO, 272.0505; found, 272.0507.

### *N*-(2,4,6-tris(trifluoromethyl)phenyl)acetamide (**2c**)

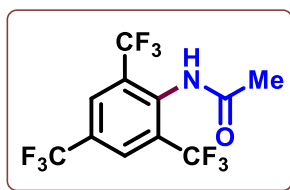

**Unknown compound.** Yield: 63%, 0.256 g. White solid. <sup>1</sup>H NMR (500 MHz, CDCl<sub>3</sub>): δ<sub>H</sub> = 8.56 (s, 2H), 8.13 (s, 1H), 2.34 (s, 3H). <sup>13</sup>C NMR (125 MHz, CDCl<sub>3</sub>): δ<sub>C</sub> = 166.76, 132.66, 132.50, 132.24, 131.85, 130.24, 128.67, 123.93, 121.75, 24.90. <sup>19</sup>F NMR (376 MHz, CDCl<sub>3</sub>): δ<sub>F</sub> = -60.97, -62.52. MS (ESI) *m/z*: [M+H]<sup>+</sup> 340.0. HRMS (ESI) *m/z* [M+H]<sup>+</sup>: calcd for C<sub>11</sub>H<sub>7</sub>F<sub>9</sub>NO, 340.0378; found, 340.0380.

Compounds **2d**, yield 83%, 0.202 g, ratio **2d-a:2d-b:2d-c** 3:3:1

### *N*-(2-(trifluoromethyl)phenyl)acetamide (**2d-a**)

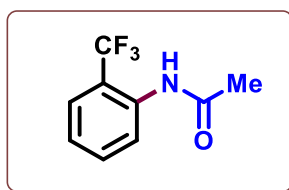

**Known compound.**<sup>22</sup> White solid. <sup>1</sup>H NMR (400 MHz, CDCl<sub>3</sub>): δ<sub>H</sub> = 8.55 (s, 1H), 7.98 (d, *J* = 7.8 Hz, 1H), 7.68 (d, *J* = 7.9 Hz, 1H), 7.62 (t, *J* = 7.6 Hz, 1H), 7.25 (t, *J* = 7.4 Hz, 1H), 2.23 (s, 3H). <sup>13</sup>C NMR (100 MHz, CDCl<sub>3</sub>): δ<sub>C</sub> = 168.31, 135.09, 132.71, 125.96, 125.91, 125.87, 125.82, 125.23, 124.61, 124.42, 122.53, 120.78, 120.30, 120.00, 119.82, 24.49. <sup>19</sup>F NMR (376 MHz, CDCl<sub>3</sub>): δ<sub>F</sub> = -60.62. MS (ESI) *m/z*: [M+H]<sup>+</sup> 204.06. HRMS-ESI (*m/z*): calcd for C<sub>9</sub>H<sub>9</sub>F<sub>3</sub>NO [M+H]<sup>+</sup>: 204.0631; found: 204.0634.

#### ***N*-(3-(trifluoromethyl)phenyl)acetamide (2d-b)**

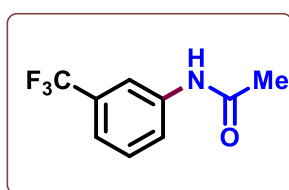

**Known compound.**<sup>22</sup> White solid. <sup>1</sup>H NMR (400 MHz, CDCl<sub>3</sub>): δ<sub>H</sub> = 8.51 (s, 1H), 7.83 (s, 1H), 7.63 (d, *J* = 7.9 Hz, 1H), 7.39 –7.31 (m, 2H), 2.14 (s, 3H). <sup>13</sup>C NMR (100 MHz, CDCl<sub>3</sub>): δ<sub>C</sub> = 169.05, 138.54, 131.89, 131.57, 131.25, 130.93, 129.66, 128.03, 125.33, 123.12, 122.63, 121.07, 121.03, 120.99, 120.95, 119.93, 116.78, 116.74, 116.70, 116.66, 24.63. <sup>19</sup>F NMR (376 MHz, CDCl<sub>3</sub>): δ<sub>F</sub> = -62.77. MS (ESI) *m/z*: [M+H]<sup>+</sup> 204.06. HRMS-ESI (*m/z*): calcd for C<sub>9</sub>H<sub>9</sub>F<sub>3</sub>NO [M+H]<sup>+</sup>: 204.0631; found: 204.0634.

#### ***N*-(4-(trifluoromethyl)phenyl)acetamide (2d-c)**

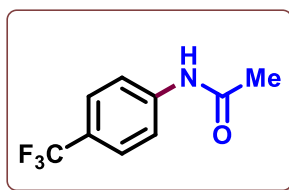

**Known compound.**<sup>22</sup> White solid. <sup>1</sup>H NMR (400 MHz, CDCl<sub>3</sub>): δ<sub>H</sub> = 8.51 (s, 1H), 7.62 (d, *J* = 7.9 Hz, 2H), 7.50 (d, *J* = 7.8 Hz, 2H), 2.15 (s, 3H). <sup>13</sup>C NMR (100 MHz, CDCl<sub>3</sub>): δ<sub>C</sub> = 168.90, 140.98, 128.68, 126.48-126.36, 125.97, 125.93, 123.25, 120.54, 119.45, 24.78. <sup>19</sup>F NMR (376 MHz, CDCl<sub>3</sub>): δ<sub>F</sub> = -62.11. MS (ESI) *m/z*: [M+H]<sup>+</sup> 204.06. HRMS-ESI (*m/z*): calcd for C<sub>9</sub>H<sub>9</sub>F<sub>3</sub>NO [M+H]<sup>+</sup>: 204.0631; found: 204.0634.

#### ***N*-(2-chloro-5-(trifluoromethyl)phenyl)acetamide (2e)**

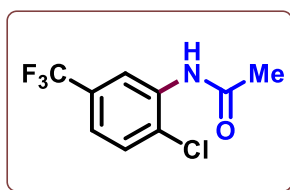

**Unknown compound.** 89%, 0.25 g. White solid, mp 94-96 °C. <sup>1</sup>H NMR (500 MHz, CDCl<sub>3</sub>): δ<sub>H</sub> = 8.77 (s, 1H), 7.70 (s, 1H), 7.51 (d, *J* = 8.3 Hz, 1H), 7.32 (dd, *J* = 8.5 Hz, 1H), 2.29 (s, 3H). <sup>13</sup>C NMR (125 MHz, CDCl<sub>3</sub>): δ<sub>C</sub> = 167.81, 134.68, 129.93, 129.67, 128.88, 125.04, 124.05, 121.89, 120.54, 117.85, 24.32. <sup>19</sup>F NMR (376 MHz, CDCl<sub>3</sub>) δ = -62.73. MS (ESI) *m/z*: [M+H]<sup>+</sup> 238.02. HRMS-ESI (*m/z*): calcd for C<sub>9</sub>H<sub>8</sub>ClF<sub>3</sub>NO [M+H]<sup>+</sup>: 238.0241; found: 238.0241.

#### N-(4-fluorophenyl)acetamide (2f)

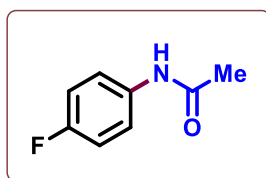

**Known compound.**<sup>23</sup> Yield: 73%, 0.13 g. White solid, mp 152-153 °C. <sup>1</sup>H NMR (400 MHz, CDCl<sub>3</sub>): δ<sub>H</sub> = 7.62 (s, 1H), 7.47 (dd, *J* = 8.6, 3.5 Hz, 2H), 7.05 (t, *J* = 8.6 Hz, 2H), 2.17 (s, 3H). <sup>13</sup>C NMR (100 MHz, CDCl<sub>3</sub>): δ<sub>C</sub> = 168.01, 159.77, 158.10, 133.44, 121.42, 121.38, 115.16, 115.06, 23.85. <sup>19</sup>F NMR (376 MHz, CDCl<sub>3</sub>): δ<sub>F</sub> = -119.69. MS (ESI) *m/z*: [M+H]<sup>+</sup> 154.06. HRMS-ESI (*m/z*): calcd for C<sub>8</sub>H<sub>9</sub>FNO [M+H]<sup>+</sup>: 154.0663, found 154.0665.

#### N-(4-chlorophenyl)acetamide (2g)

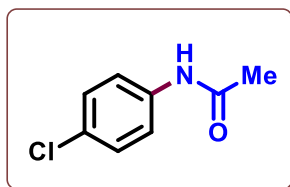

**Known compound.**<sup>23</sup> Yield: 44%, 0.089 g. Brown solid, mp 176-179 °C. <sup>1</sup>H NMR (400 MHz, CDCl<sub>3</sub>): δ<sub>H</sub> = 7.91 (s, 1H), 7.45 (d, *J* = 7.9 Hz, 2H), 7.28 (d, *J* = 7.9 Hz, 2H), 2.16 (s, 3H). <sup>13</sup>C NMR (100 MHz, CDCl<sub>3</sub>): δ<sub>C</sub> = 168.69, 136.47, 129.61-129.33, 121.03, 24.29. MS (ESI) *m/z*: [M+H]<sup>+</sup> 170.03. HRMS-ESI (*m/z*): calcd for C<sub>8</sub>H<sub>9</sub>ClNO [M+H]<sup>+</sup>: 170.0367; found: 170.0369.

#### N-(3,4-dichlorophenyl)acetamide (2h-a)

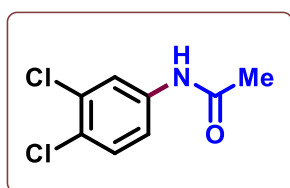

**Known compound.**<sup>24</sup> Yield: 48%, 0.118 g. White solid, mp 120-122°C. <sup>1</sup>H NMR (400 MHz, CDCl<sub>3</sub>): δ<sub>H</sub> = 8.58 (s, 1H), 8.14 (d, *J* = 2.5 Hz, 1H), 7.52 (d, *J* = 8.0 Hz, 1H), 7.48 (dd, *J* = 8.0, 2.4 Hz, 1H), 2.06 (s, 3H). <sup>13</sup>C NMR (100 MHz, CDCl<sub>3</sub>): δ<sub>C</sub> = 169.28, 139.84, 131.46, 131.03, 124.80, 120.53, 119.42, 24.48. MS (ESI) *m/z*: [M+H]<sup>+</sup> 203.99. HRMS-ESI (*m/z*): calcd for C<sub>8</sub>H<sub>8</sub>Cl<sub>2</sub>NO [M+H]<sup>+</sup>: 203.9977; found: 203.9978.

#### *N*-(2,3-dichlorophenyl)acetamide (2h-b)

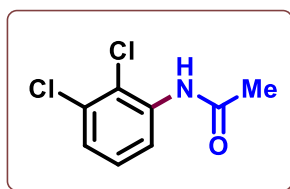

**Known compound.**<sup>25</sup> Yield: 16%, 0.04 g. White solid. <sup>1</sup>H NMR (400 MHz, CDCl<sub>3</sub>): δ<sub>H</sub> = 7.99 (s, 1H), 7.89 (dd, *J* = 8.2, 2.1 Hz, 1H), 7.39 (dd, *J* = 7.8, 2.2 Hz, 1H), 7.32 (t, *J* = 8.0 Hz, 1H), 2.20 (s, 3H). <sup>13</sup>C NMR (100 MHz, CDCl<sub>3</sub>): δ<sub>C</sub> = 168.27, 136.75, 131.69, 126.96, 125.53, 124.21, 123.27, 23.14. MS (ESI) *m/z*: [M+H]<sup>+</sup> 203.9. HRMS-ESI (*m/z*): calcd for C<sub>8</sub>H<sub>8</sub>Cl<sub>2</sub>NO [M+H]<sup>+</sup>: 203.9977; found: 203.9979.

#### *N*-(5-chloro-2-hydroxyphenyl)acetamide (2i)

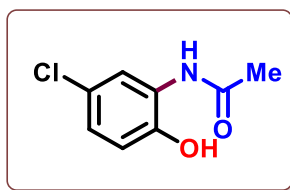

**Known compound.**<sup>26</sup> Yield: 13%, 0.029 g. White solid. <sup>1</sup>H NMR (400 MHz, CD<sub>3</sub>CN): δ<sub>H</sub> = 8.46 (s, 1H), 8.34 (s, 1H), 7.49 (dd, *J* = 2.6 Hz, 1H), 7.05 (dd, *J* = 8.6, 2.6 Hz, 1H), 6.90 (d, *J* = 8.7 Hz, 1H), 2.18 (s, 3H). <sup>13</sup>C NMR (100 MHz, CD<sub>3</sub>CN): δ<sub>C</sub> = 169.16, 146.29, 127.86, 123.50, 122.12, 121.08, 116.39, 23.86. MS (ESI) *m/z*: [M+H]<sup>+</sup> 186.02. HRMS-ESI (*m/z*): calcd for C<sub>8</sub>H<sub>9</sub>ClNO<sub>2</sub> [M+H]<sup>+</sup>: 186.0316; found: 186.0318.

#### 5-chloro-2-methylbenzo[d]oxazole (2ii)

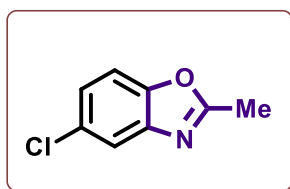

**Known compound.**<sup>26</sup> Yield: 53%, 0.106 g. White crystals, mp 52-54 °C. <sup>1</sup>H NMR (400 MHz, CDCl<sub>3</sub>): δ<sub>H</sub> = 7.65 (d, *J* = 2.5 Hz, 1H), 7.40 (d, *J* = 8.6 Hz, 1H), 7.28 (dd, *J* = 8.5, 2.5 Hz, 1H), 2.65 (s, 3H). <sup>13</sup>C NMR (100 MHz, CDCl<sub>3</sub>): δ<sub>C</sub> = 165.75, 149.97, 143.13, 129.98, 125.20, 119.85, 111.36, 14.94. MS (ESI) *m/z*: [M+H]<sup>+</sup> 168.02. HRMS-ESI (*m/z*): calcd for C<sub>8</sub>H<sub>7</sub>ONCl [M+H]<sup>+</sup>: 168.0211; found: 168.0211.

### *N*-(5-bromo-2-hydroxyphenyl)acetamide (2j)

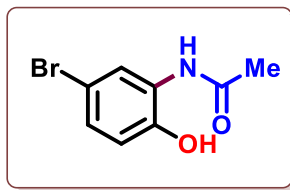

**Known compound.**<sup>26</sup> Yield: 23%, 0.064 g. White solid. <sup>1</sup>H NMR (400 MHz, CD<sub>3</sub>CN): δ<sub>H</sub> = 8.75 (s, 1H), 8.44 (s, 1H), 7.61 (d, *J* = 2.4 Hz, 1H), 7.18 (dd, *J* = 8.6, 2.4 Hz, 1H), 6.84 (d, *J* = 8.6 Hz, 1H), 2.16 (s, 3H). <sup>13</sup>C NMR (100 MHz, CD<sub>3</sub>CN): δ<sub>C</sub> = 169.09, 146.76, 128.04, 126.40, 123.82, 116.88, 109.64, 23.85. MS (ESI) *m/z*: [M+H]<sup>+</sup> 230.0. HRMS-ESI (*m/z*): calcd for C<sub>8</sub>H<sub>9</sub>BrNO<sub>2</sub> [M+H]<sup>+</sup>: 229.9811; found: 229.9814.

### 5-bromo-2-methylbenzo[d]oxazole (2jj)

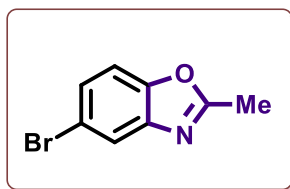

**Known compound.**<sup>26</sup> Yield: 45%, 0.114 g. White solid, mp 65-67 °C. <sup>1</sup>H NMR (400 MHz, CDCl<sub>3</sub>): δ<sub>H</sub> = 7.80 (d, *J* = 1.9 Hz, 1H), 7.42 (dd, *J* = 8.6, 1.9 Hz, 1H), 7.35 (d, *J* = 8.5 Hz, 1H), 2.65 (s, 3H). <sup>13</sup>C NMR (100 MHz, CDCl<sub>3</sub>): δ<sub>C</sub> = 164.65, 149.48, 142.61, 127.00, 121.98, 110.93, 14.00. MS (ESI) *m/z*: [M+H]<sup>+</sup> 211.97. HRMS-ESI (*m/z*): calcd for C<sub>8</sub>H<sub>7</sub>ONBr [M+H]<sup>+</sup>: 211.9705; found: 211.9710.

### *N*-phenylacetamide (2k)

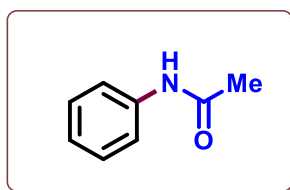

**Known compound.**<sup>23</sup> Yield: 72%, 0.115 g. Light brown solid, mp 113-115 °C. <sup>1</sup>H NMR (400 MHz, CDCl<sub>3</sub>): δ<sub>H</sub> = 8.48 (s, 1H), 7.54 (d, *J* = 7.8 Hz, 2H), 7.29 (t, *J* = 7.9 Hz, 2H), 7.10 (t, *J* = 7.4 Hz, 1H), 2.14 (s, 3H). <sup>13</sup>C NMR (100 MHz, CDCl<sub>3</sub>): δ<sub>C</sub> = 169.83, 138.71, 129.40, 124.82, 120.86, 24.84. MS (ESI) *m/z*: [M+H]<sup>+</sup> 136.07. HRMS-ESI (*m/z*): calcd for C<sub>8</sub>H<sub>10</sub>NO [M+H]<sup>+</sup>: 136.0762; found: 136.0761.

Compounds 2l, yield 79%, 0.152 g, ratio 2l-a:2l-b:2l-c = 1.3:1:1.3

### *N*-(2-cyanophenyl)acetamide (2l-a)



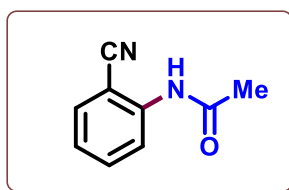

**Known compound.**<sup>27</sup> White solid. <sup>1</sup>H NMR (400 MHz, CDCl<sub>3</sub>): δ<sub>H</sub> = 10.99 (s, 1H), 8.72 (d, *J* = 8.7 Hz, 1H), 8.12 (dd, *J* = 8.1, 1.7 Hz, 1H), 7.61 (t, *J* = 7.5 Hz, 1H), 7.13 (t, *J* = 7.7 Hz, 1H), 2.26 (s, 3H). <sup>13</sup>C NMR (100 MHz, CDCl<sub>3</sub>): δ<sub>C</sub> = 167.84, 141.44, 134.71, 131.53, 124.76, 121.66, 115.68, 24.82. MS (ESI) *m/z*: [M+H]<sup>+</sup> 161.07. HRMS-ESI (*m/z*): calcd for C<sub>9</sub>H<sub>9</sub>N<sub>2</sub>O [M+H]<sup>+</sup>: 161.0709; found: 161.0709.

#### ***N*-(3-cyanophenyl)acetamide (2l-b)**

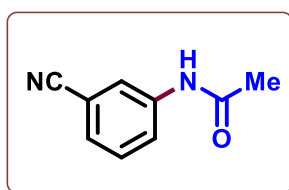

**Known compound.**<sup>21</sup> White solid. <sup>1</sup>H NMR (400 MHz, CDCl<sub>3</sub>): δ<sub>H</sub> = 7.93 (s, 1H), 7.73 (d, *J* = 8.1 Hz, 1H), 7.55 (s, 1H), 7.51 – 7.42 (m, 2H), 2.23 (s, 3H). <sup>13</sup>C NMR (100 MHz, CDCl<sub>3</sub>): δ<sub>C</sub> = 169.31, 139.02, 129.91, 127.64, 124.11, 123.01, 118.70, 112.69, 24.43. MS (ESI) *m/z*: [M+H]<sup>+</sup> 161.07. HRMS-ESI (*m/z*): calcd for C<sub>9</sub>H<sub>9</sub>N<sub>2</sub>O [M+H]<sup>+</sup>: 161.0709; found: 161.0709.

#### ***N*-(4-cyanophenyl)acetamide (2l-c)**

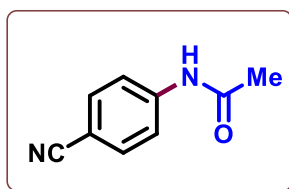

**Known compound.**<sup>28</sup> White solid. <sup>1</sup>H NMR (400 MHz, CDCl<sub>3</sub>): δ<sub>H</sub> = 7.67 (d, *J* = 9.0 Hz, 2H), 7.62 (d, *J* = 8.2 Hz, 2H), 7.59 (s, 1H), 2.24 (s, 3H). <sup>13</sup>C NMR (100 MHz, CDCl<sub>3</sub>): δ<sub>C</sub> = 169.21, 143.54, 133.21, 119.12, 104.67, 24.26. MS (ESI) *m/z*: [M+H]<sup>+</sup> 161.07. HRMS-ESI (*m/z*): calcd for C<sub>9</sub>H<sub>9</sub>N<sub>2</sub>O [M+H]<sup>+</sup>: 161.0709; found: 161.0709.

Compounds **2m**, yield 64%, 0.138 g, ratio **2m-a:2m-b :2m-c**= 3.5:1.3:1

#### ***N*-(2-nitrophenyl)acetamide (2m-a)**

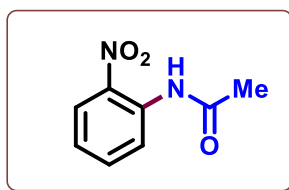

**Known compound.**<sup>29</sup> Yield: 39%, 0.084 g. Yellow solid, mp 91-93 °C. <sup>1</sup>H NMR (400 MHz, CDCl<sub>3</sub>): δ<sub>H</sub> = 10.34 (s, 1H), 8.79 (d, *J* = 8.7 Hz, 1H), 8.23 (dd, *J* = 8.5 Hz, 1H), 7.69 – 7.65 (m, 1H), 7.20 (t, *J* = 7.9 Hz, 1H), 2.31 (s, 3H). <sup>13</sup>C NMR (100 MHz, CDCl<sub>3</sub>): δ<sub>C</sub> = 169.97, 135.94, 134.87, 134.51, 127.70, 123.19, 122.20, 25.60. MS (ESI) *m/z*: [M+H]<sup>+</sup> 180.06. HRMS-ESI (*m/z*): calcd for C<sub>8</sub>H<sub>9</sub>N<sub>2</sub>O<sub>3</sub> [M+H]<sup>+</sup>: 181.0608; found: 181.0608.

***N*-(3-nitrophenyl)acetamide (2m-b)**

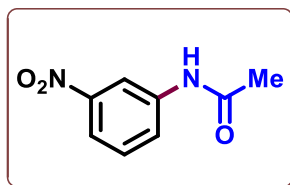

**Known compound.**<sup>30</sup> Yield: 14%, 0.03 g. Yellow solid, mp 103-105 °C. <sup>1</sup>H NMR (400 MHz, CDCl<sub>3</sub>): δ<sub>H</sub> = 8.38 (s, 1H), 7.97 (dd, *J* = 8.0, 2.1 Hz, 2H), 7.71 (s, 1H), 7.50 (t, *J* = 8.2 Hz, 1H), 2.25 (s, 3H). <sup>13</sup>C NMR (100 MHz, CDCl<sub>3</sub>): δ<sub>C</sub> = 168.39, 148.03, 138.59, 129.31, 125.08, 118.32, 114.03, 24.04. MS (ESI) *m/z*: [M+H]<sup>+</sup> 180.06. HRMS-ESI (*m/z*): calcd for C<sub>8</sub>H<sub>9</sub>N<sub>2</sub>O<sub>3</sub> [M+H]<sup>+</sup>: 181.0608; found: 181.0607.

***N*-(4-nitrophenyl)acetamide (2m-c)**

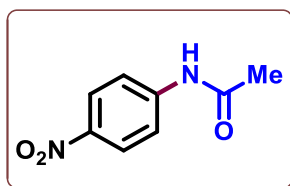

**Known compound.**<sup>31</sup> Yield: 11%, 0.023 g. Yellow solid, mp 96-98 °C. <sup>1</sup>H NMR (400 MHz, CDCl<sub>3</sub>): δ<sub>H</sub> = 8.22 (d, *J* = 9.2 Hz, 1H), 7.71 (d, *J* = 9.1 Hz, 2H), 6.33 (s, 1H), 2.26 (s, 3H). <sup>13</sup>C NMR (100 MHz, CDCl<sub>3</sub>): δ<sub>C</sub> = 170.31, 145.32, 142.75, 124.56, 118.73, 23.56. MS (ESI) *m/z*: [M+H]<sup>+</sup> 180.06. HRMS-ESI (*m/z*): calcd for C<sub>8</sub>H<sub>9</sub>N<sub>2</sub>O<sub>3</sub> [M+H]<sup>+</sup>: 181.0608; found: 181.0608.

Compounds 2n, yield 82%, 0.211 g, ratio 2n-a:2n-b = 1.2:1

***N*-(4-chloro-3-nitrophenyl)acetamide (2n-a)**

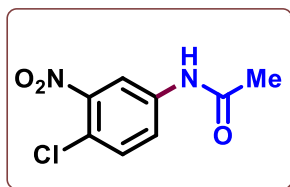

**Known compound.**<sup>32</sup> Yield: 49%. <sup>1</sup>H NMR (500 MHz, CDCl<sub>3</sub>): δ<sub>H</sub> = 8.15 (d, *J* = 2.24, 1H), 7.72 (dd, *J* = 8.74, 2.24 Hz, 1H), 7.51 (s, 1H), 7.49 (d, *J* = 8.74 Hz, 2H), 2.23 (s, 3H). <sup>13</sup>C NMR (125 MHz, CDCl<sub>3</sub>): δ<sub>C</sub> = 167.99, 147.45, 136.91, 131.62, 123.25, 120.89, 115.74, 24.01. MS (ESI) *m/z*: [M+H]<sup>+</sup> 215.02. HRMS-ESI (*m/z*): calcd for C<sub>8</sub>H<sub>8</sub>ClN<sub>2</sub>O<sub>3</sub> [M+H]<sup>+</sup>: 215.0218; found: 215.0220

### *N*-(2-chloro-3-nitrophenyl)acetamide (2n-b)

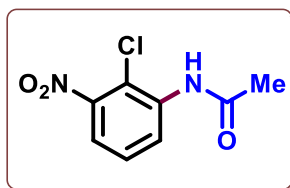

**Unknown compound.** Yield: 33%.  $^1\text{H}$  NMR (500 MHz,  $\text{CDCl}_3$ ):  $\delta_{\text{H}} = 8.67$  (d,  $J = 8.41$  Hz, 1H), 7.81 (s, 1H), 7.60 (dd,  $J = 8.15, 1.45$  Hz, 1H), 7.44 (t,  $J = 8.2$  Hz, 1H), 2.32 (s, 3H).  $^{13}\text{C}$  NMR (125 MHz,  $\text{CDCl}_3$ ):  $\delta_{\text{C}} = 167.99, 148.02, 136.05, 127.32, 124.28, 119.41, 113.58, 24.39$ . MS (ESI)  $m/z$ :  $[\text{M}+\text{H}]^+$  215.02. HRMS-ESI ( $m/z$ ): calcd for  $\text{C}_8\text{H}_8\text{ClN}_2\text{O}_3$   $[\text{M}+\text{H}]^+$ : 215.0218; found: 215.0220

### *N*-(2-chloro-5-nitrophenyl)acetamide (2o-a)

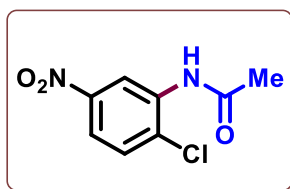

**Known compound.**<sup>33</sup> Yield: 77%, 0.198 g. Yellow solid, mp 155-158 °C.  $^1\text{H}$  NMR (400 MHz,  $\text{CDCl}_3$ ):  $\delta_{\text{H}} = 9.13$  (d,  $J = 2.6$  Hz, 1H), 8.10 (s, 1H), 7.98 (dd,  $J = 8.8$  Hz, 1H), 7.59 (d,  $J = 8.4$  Hz, 1H), 2.37 (s, 3H).  $^{13}\text{C}$  NMR (100 MHz,  $\text{CDCl}_3$ ):  $\delta_{\text{C}} = 170.13, 148.33, 135.21, 130.06, 128.55, 119.14, 117.13, 24.21$ . MS (ESI)  $m/z$ :  $[\text{M}+\text{H}]^+$  215.02. HRMS-ESI ( $m/z$ ): calcd for  $\text{C}_8\text{H}_8\text{ClN}_2\text{O}_3$   $[\text{M}+\text{H}]^+$ : 215.0218; found: 215.0218.

### *N*-(5-chloro-2-nitrophenyl)acetamide (2o-b)

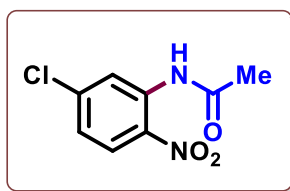

**Known compound.**<sup>34</sup> Yield: 11%, 0.028 g. Yellow solid, mp 115-118 °C.  $^1\text{H}$  NMR (400 MHz,  $\text{CDCl}_3$ ):  $\delta_{\text{H}} = 10.45$  (s, 1H), 8.78 (d,  $J = 2.3$  Hz, 1H), 8.19 (d,  $J = 9.1$  Hz, 1H), 7.20 (dd,  $J = 9.0, 2.2$  Hz, 1H), 2.34 (s, 3H).  $^{13}\text{C}$  NMR (100 MHz,  $\text{CDCl}_3$ ):  $\delta_{\text{C}} = 169.20, 142.95, 135.93, 134.46, 127.05, 123.54, 121.77, 25.75$ . MS (ESI)  $m/z$ :  $[\text{M}+\text{H}]^+$  215.02. HRMS-ESI ( $m/z$ ): calcd for  $\text{C}_8\text{H}_8\text{ClN}_2\text{O}_3$   $[\text{M}+\text{H}]^+$ : 215.0218; found: 215.0218.

### *N*-(2-fluoro-5-nitrophenyl)acetamide (2p)

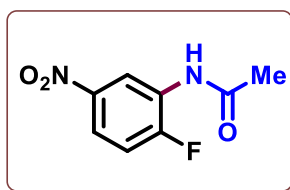

**Known compound.**<sup>35</sup> Yield: 68%, 0.159 g. Pale orange solid, mp 177-178 °C. <sup>1</sup>H NMR (400 MHz, CD<sub>3</sub>CN): δ<sub>H</sub> = 9.15 (dd, *J* = 6.9, 2.9 Hz, 1H), 8.49 (s, 1H), 7.99 (ddd, *J* = 9.1, 4.2, 2.9 Hz, 1H), 7.36 (dd, *J* = 10.2, 9.1 Hz, 1H), 2.19 (s, 3H). <sup>13</sup>C NMR (100 MHz, CD<sub>3</sub>CN): δ<sub>C</sub> = 169.57, 157.44, 154.78, 143.73, 135.93, 127.62, 127.54, 120.13, 120.05, 116.61, 116.43, 23.69. <sup>19</sup>F NMR (376 MHz, CDCl<sub>3</sub>): δ<sub>F</sub> = -118.17. MS (ESI) *m/z*: [M+H]<sup>+</sup> 199.05. HRMS-ESI (*m/z*): calcd for C<sub>8</sub>H<sub>8</sub>FN<sub>2</sub>O<sub>3</sub> [M+H]<sup>+</sup>: 199.0513; found: 199.0513.

### ***N*-(2-bromo-5-nitrophenyl)acetamide (2q)**

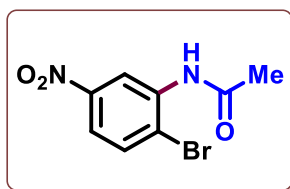

**Known compound.**<sup>36</sup> Yield: 64%, 0.198 g. Yellow solid, mp 182-183 °C. <sup>1</sup>H NMR (400 MHz, CDCl<sub>3</sub>): δ<sub>H</sub> = 9.19 (s, 1H), 8.11 (d, *J* = 8.9 Hz, 1H), 7.88 (dd, *J* = 9.1, 2.6 Hz, 1H), 7.75 (d, *J* = 8.8 Hz, 1H), 2.35 (s, 3H). <sup>13</sup>C NMR (100 MHz, CDCl<sub>3</sub>): δ<sub>C</sub> = 1169.30, 147.47, 137.78, 134.53, 120.97, 120.17, 23.98. MS (ESI) *m/z*: [M+H]<sup>+</sup> 258.97. HRMS-ESI (*m/z*): calcd for C<sub>8</sub>H<sub>8</sub>BrN<sub>2</sub>O<sub>3</sub> [M+H]<sup>+</sup>: 258.9713; found: 258.9713.

Compounds **2r**, yield 78%, 0.196 g, ratio **2r-a:2r-b:2r-c** = 2.2:1.7:1

### **Ethyl 2-acetamidobenzoate (2r-a)**

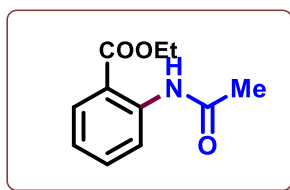

**Known compound.**<sup>37</sup> <sup>1</sup>H NMR (400 MHz, CDCl<sub>3</sub>): δ<sub>H</sub> = 11.10 (s, 1H), 8.71 (d, *J* = 8.7 Hz, 1H), 8.05 (dd, *J* = 8.1, 1.7 Hz, 1H), 7.44 (t, *J* = 7.5 Hz, 1H), 7.09 (t, *J* = 7.7 Hz, 1H), 4.39 (q, *J* = 7.5 Hz, 2H), 2.24 (s, 3H), 1.41 (t, *J* = 7.5 Hz, 3H). <sup>13</sup>C NMR (100 MHz, CDCl<sub>3</sub>): δ<sub>C</sub> = 169.57, 168.87, 142.17, 135.07, 130.06, 122.88, 120.84, 115.62, 61.90, 25.99, 14.70. MS (ESI) *m/z*: [M+H]<sup>+</sup> 208.09. HRMS-ESI (*m/z*): calcd for C<sub>11</sub>H<sub>14</sub>NO<sub>3</sub> [M+H]<sup>+</sup>: 208.0968; found: 208.0968.

### **Ethyl 3-acetamidobenzoate (2r-b)**

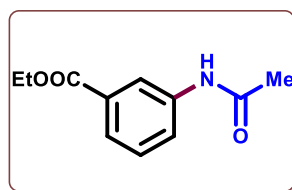

**Known compound.**<sup>38</sup>  $^1\text{H}$  NMR (400 MHz,  $\text{CDCl}_3$ ):  $\delta_{\text{H}}$  = 8.03 (s, 1H), 8.00 (s, 1H), 7.91 (d,  $J$  = 8.6 Hz, 1H), 7.79 (d,  $J$  = 6.9 Hz, 1H), 7.39 (t,  $J$  = 8.0 Hz, 1H), 4.37 (q,  $J$  = 7.1 Hz, 6H), 2.21 (s, 3H), 1.39 (t,  $J$  = 7.1 Hz, 3H).  $^{13}\text{C}$  NMR (100 MHz,  $\text{CDCl}_3$ ):  $\delta_{\text{C}}$  = 168.74, 165.81, 137.82, 130.42, 128.41, 125.01, 124.61, 124.11, 60.31, 23.80, 13.67. MS (ESI)  $m/z$ :  $[\text{M}+\text{H}]^+$  208.09. HRMS-ESI ( $m/z$ ): calcd for  $\text{C}_{11}\text{H}_{14}\text{NO}_3$   $[\text{M}+\text{H}]^+$ : 208.0968; found: 208.09670.

#### Ethyl 4-((methoxycarbonyl)amino)benzoate (2r-c)

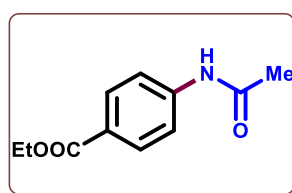

**Known compound.**<sup>38</sup>  $^1\text{H}$  NMR (400 MHz,  $\text{CDCl}_3$ ):  $\delta_{\text{H}}$  = 8.02 (d,  $J$  = 4.8 Hz, 2H), 7.61 (d,  $J$  = 8.4 Hz, 2H), 4.37 (q,  $J$  = 7.1 Hz, 2H), 2.21 (s, 3H), 1.38 (t,  $J$  = 7.1 Hz, 3H).  $^{13}\text{C}$  NMR (100 MHz,  $\text{CDCl}_3$ ):  $\delta_{\text{C}}$  = 168.80, 165.83, 141.91, 130.02, 120.41, 118.31, 60.61, 24.00, 13.67. MS (ESI)  $m/z$ :  $[\text{M}+\text{H}]^+$  208.09. HRMS-ESI ( $m/z$ ): calcd for  $\text{C}_{11}\text{H}_{14}\text{NO}_3$   $[\text{M}+\text{H}]^+$ : 208.0968; found: 208.0970.

#### Dimethyl 4-acetamidoisophthalate (2s-a)

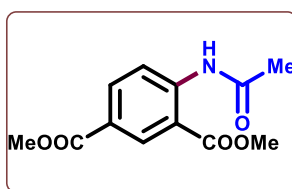

**Unknown compound.** Yield: 42%, 0.126 g. White solid, mp 156.8 °C.  $^1\text{H}$  NMR (500 MHz,  $\text{CDCl}_3$ ):  $\delta_{\text{H}}$  = 11.27 (s, 1H), 8.80 (d,  $J$  = 8.9 Hz, 1H), 8.72 (d,  $J$  = 2.1 Hz, 1H), 8.18 (dd,  $J$  = 8.9, 2.2 Hz, 1H), 3.97 (s, 3H), 3.93 (s, 3H), 2.27 (s, 3H).  $^{13}\text{C}$  NMR (125 MHz,  $\text{CDCl}_3$ ):  $\delta_{\text{C}}$  = 169.81, 168.80, 166.38, 145.68, 136.12, 133.31, 124.50, 120.36, 114.90, 53.08, 52.71, 26.08. MS (ESI)  $m/z$ :  $[\text{M}+\text{H}]^+$  252.08. HRMS-ESI ( $m/z$ ): calcd for  $\text{C}_{12}\text{H}_{14}\text{NO}_5$   $[\text{M}+\text{H}]^+$ : 252.0867; found: 252.0868.

#### Dimethyl 2-acetamidoisophthalate (2s-b)

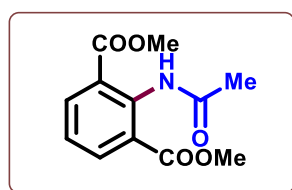

**Unknown compound.** Yield: 33%, 0.099 g. White solid.  $^1\text{H}$  NMR (500 MHz,  $\text{CDCl}_3$ ):  $\delta_{\text{H}} = 10.54$  (s, 1H), 8.04 (d,  $J = 7.8$  Hz, 2H), 7.24 (t,  $J = 7.8$  Hz, 1H), 3.93 (s, 6H), 2.23 (s, 3H).  $^{13}\text{C}$  NMR (125 MHz,  $\text{CDCl}_3$ ):  $\delta_{\text{C}} = 169.02, 167.47, 137.44, 134.13, 123.87, 123.49, 52.50, 24.41$ . MS (ESI)  $m/z$ :  $[\text{M}+\text{H}]^+$  252.08. HRMS-ESI ( $m/z$ ): calcd for  $\text{C}_{12}\text{H}_{14}\text{NO}_5$   $[\text{M}+\text{H}]^+$ : 252.0867; found: 252.0868.

#### ***N*-(4-hydroxyphenyl)acetamide (2t)**

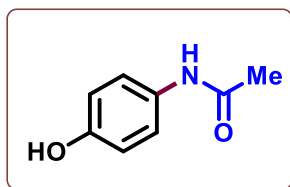

**Known compound.**<sup>39</sup> Yield: 74%, 0.132 g. White solid, mp 167-170 °C.  $^1\text{H}$  NMR (400 MHz,  $\text{DMSO-d}_6$ ):  $\delta_{\text{H}} = 9.61$  (s, 1H), 9.09 (s, 1H), 7.33 (d,  $J = 8.8$  Hz, 2H), 6.67 (d,  $J = 8.8$  Hz, 2H), 1.97 (s, 3H).  $^{13}\text{C}$  NMR (100 MHz,  $\text{DMSO-d}_6$ ):  $\delta_{\text{C}} = 168.47, 154.11, 132.04, 121.81, 115.98, 24.72$ . MS (ESI)  $m/z$ :  $[\text{M}+\text{H}]^+$  152.07. HRMS-ESI ( $m/z$ ): calcd for  $\text{C}_8\text{H}_{10}\text{NO}_2$   $[\text{M}+\text{H}]^+$ : 152.0706; found: 152.0709.

#### ***N*-(4-hydroxy-3,5-dimethylphenyl)acetamide (2u)**

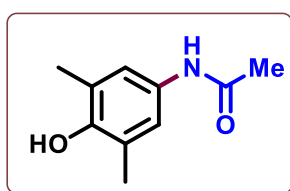

**Known compound.**<sup>39</sup> Yield: 67%, 0.144 g. Brown solid, mp 141-144 °C.  $^1\text{H}$  NMR (400 MHz,  $\text{DMSO-d}_6$ ):  $\delta_{\text{H}} = 9.21$  (s, 1H), 7.94 (s, 1H), 7.31 (s, 2H), 2.13 (s, 6H), 1.98 (s, 3H).  $^{13}\text{C}$  NMR (100 MHz,  $\text{DMSO-d}_6$ ):  $\delta_{\text{C}} = 168.23, 149.65, 131.82, 125.06, 120.28, 24.56, 17.57$ . MS (ESI)  $m/z$ :  $[\text{M}+\text{H}]^+$  180.10. HRMS-ESI ( $m/z$ ): calcd for  $\text{C}_{10}\text{H}_{14}\text{NO}_2$   $[\text{M}+\text{H}]^+$ : 180.1019; found: 180.1018.

#### ***N*-(4-hydroxy-3-methylphenyl)acetamide (2v)**

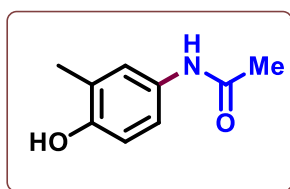

**Known compound.**<sup>39</sup> Yield: 68%, 0.135 g. White solid, mp 160-163 °C.  $^1\text{H}$  NMR (400 MHz,  $\text{CD}_3\text{CN}$ ):  $\delta_{\text{H}} = 9.17$  (s, 1H), 8.85 (s, 1H), 7.17 (dq,  $J = 4.6, 2.1$  Hz, 2H), 6.66 (d,  $J = 9.0$  Hz, 1H), 2.16 (s, 3H), 2.03 (s, 3H).  $^{13}\text{C}$  NMR (100 MHz,  $\text{CD}_3\text{CN}$ ):  $\delta_{\text{C}} = 169.82, 152.10, 130.04, 124.42, 123.24, 119.24, 114.12, 22.16, 14.97$ . MS (ESI)  $m/z$ :  $[\text{M}+\text{H}]^+$  166.08. HRMS-ESI ( $m/z$ ): calcd for  $\text{C}_9\text{H}_{12}\text{NO}_2$   $[\text{M}+\text{H}]^+$ : 166.0868; found: 166.0868.

### Methyl 5-acetamido-2-hydroxybenzoate (2w)

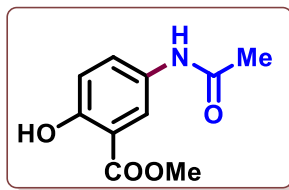

**Known compound.**<sup>40</sup> Yield: 42%, 0.105 g. Brown solid, mp 143-145 °C. <sup>1</sup>H NMR (400 MHz, CD<sub>3</sub>CN):  $\delta_{\text{H}}$  = 8.64 (s, 1H), 8.04 (d,  $J$  = 2.3 Hz, 1H), 7.60 (s, 1H), 7.54 (dd,  $J$  = 9.0, 2.8 Hz, 1H), 6.93 (d,  $J$  = 9.0 Hz, 1H), 3.93 (s, 3H), 2.13 (s, 3H). <sup>13</sup>C NMR (100 MHz, CD<sub>3</sub>CN):  $\delta_{\text{C}}$  = 170.83, 170.60, 158.70, 130.38, 129.25, 121.94, 118.13, 112.65, 52.86, 23.07. MS (ESI)  $m/z$ : [M+H]<sup>+</sup> 210.07. HRMS-ESI ( $m/z$ ): calcd for C<sub>10</sub>H<sub>12</sub>NO<sub>4</sub> [M+H]<sup>+</sup>: 210.0761; found: 210.0762.

### Methyl 2-methylbenzo[d]oxazole-7-carboxylate (2ww)

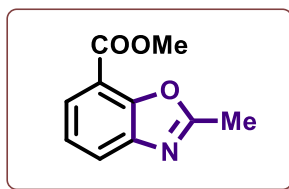

**Unknown compound.** Yield: 35%, 0.08 g. Brown oil. <sup>1</sup>H NMR (400 MHz, CDCl<sub>3</sub>):  $\delta_{\text{H}}$  = 7.95 (dd,  $J$  = 7.8, 1.2 Hz, 1H), 7.86 (dd,  $J$  = 7.9, 1.2 Hz, 1H), 7.38 (t,  $J$  = 7.9 Hz, 1H), 4.02 (s, 3H), 2.73 (s, 3H). <sup>13</sup>C NMR (100 MHz, CDCl<sub>3</sub>):  $\delta_{\text{C}}$  = 165.09, 164.70, 135.70, 124.29, 123.95, 119.16, 117.59, 111.60, 52.26, 14.59. MS (ESI)  $m/z$ : [M+H]<sup>+</sup> 192.06. HRMS-ESI ( $m/z$ ): calcd for C<sub>10</sub>H<sub>10</sub>NO<sub>3</sub> [M+H]<sup>+</sup>: 192.0655; found: 192.0655.

### Ethyl 5-acetamido-2-hydroxybenzoate (2x)

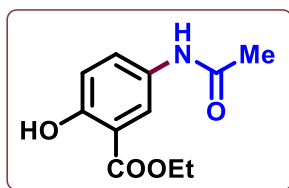

**Unknown compound.** Yield: 41%, 0.11 g. Brown solid, mp 121-124 °C. <sup>1</sup>H NMR (400 MHz, CDCl<sub>3</sub>):  $\delta_{\text{H}}$  = 10.69 (s, 1H), 7.98 (d,  $J$  = 2.7 Hz, 1H), 7.54 (dd,  $J$  = 8.9, 2.7 Hz, 1H), 7.29 (s, 1H), 6.94 (d,  $J$  = 8.9 Hz, 1H), 4.41 (q,  $J$  = 7.3 Hz, 2H), 2.16 (s, 1H), 1.41 (t,  $J$  = 7.1 Hz, 3H). <sup>13</sup>C NMR (100 MHz, CDCl<sub>3</sub>):  $\delta_{\text{C}}$  = 170.30, 168.97, 159.16, 129.87, 129.40, 122.33, 118.46, 112.89, 62.15, 24.71, 14.69. MS (ESI)  $m/z$ : [M+H]<sup>+</sup> 224.09. HRMS-ESI ( $m/z$ ): calcd for C<sub>11</sub>H<sub>14</sub>NO<sub>4</sub> [M+H]<sup>+</sup>: 224.0917; found: 224.0919.

### Ethyl 2-methylbenzo[d]oxazole-7-carboxylate (2xx)

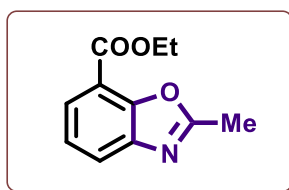

**Unknown compound.** Yield: 34%, 0.084 g. Brown oil.  $^1\text{H}$  NMR (400 MHz,  $\text{CDCl}_3$ ):  $\delta_{\text{H}} = 7.95$  (dd,  $J = 7.8, 1.2$  Hz, 1H),  $7.85$  (dd,  $J = 7.9, 1.2$  Hz, 1H),  $7.38$  (t,  $J = 7.9$  Hz, 1H),  $4.49$  (q,  $J = 7.1$  Hz, 2H),  $2.72$  (s, 1H),  $1.46$  (t,  $J = 7.2$  Hz, 3H).  $^{13}\text{C}$  NMR (100 MHz,  $\text{CDCl}_3$ ):  $\delta_{\text{C}} = 165.57, 164.73, 150.58, 143.42, 127.02, 124.67, 124.38, 115.59, 61.86, 15.12, 14.86$ . MS (ESI)  $m/z$ :  $[\text{M}+\text{H}]^+$  206.08. HRMS-ESI ( $m/z$ ): calcd for  $\text{C}_{11}\text{H}_{12}\text{NO}_3$   $[\text{M}+\text{H}]^+$ : 206.0812; found: 206.0814.

### *N*-(2,5-bis(trifluoromethyl)phenyl)propionamide (3a)

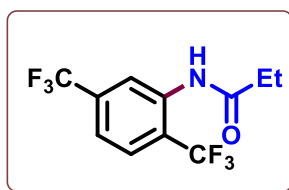

**Known compound.**<sup>21</sup> Yield: 85%, 0.287 g. White solid, mp 83-85 °C.  $^1\text{H}$  NMR (400 MHz,  $\text{CDCl}_3$ ):  $\delta_{\text{H}} = 8.69$  (s, 1H),  $7.75$  (d,  $J = 8.0$  Hz, 1H),  $7.55$  (d,  $J = 7.5$  Hz, 2H),  $2.50$  (q,  $J = 7.5$  Hz, 2H),  $1.30$  (t,  $J = 7.5$  Hz, 3H).  $^{13}\text{C}$  NMR (100 MHz,  $\text{CDCl}_3$ ):  $\delta_{\text{C}} = 172.62, 136.77, 136.06, 135.73, 135.40, 135.06, 128.00, 127.94, 127.89, 127.66, 127.37, 127.31, 127.26, 127.21, 125.30, 124.95, 122.58, 122.23, 121.54, 121.50, 121.29, 121.25, 119.85, 119.51, 31.38, 9.72$ .  $^{19}\text{F}$  NMR (376 MHz,  $\text{CDCl}_3$ ):  $\delta_{\text{F}} = -61.22, -63.41$ . MS (ESI)  $m/z$ :  $[\text{M}+\text{H}]^+$  286.06. HRMS-ESI ( $m/z$ ): calcd for  $\text{C}_{11}\text{H}_{10}\text{F}_6\text{NO}$   $[\text{M}+\text{H}]^+$ : 286.0661; found: 286.0662.

### *N*-(2,6-bis(trifluoromethyl)phenyl)propionamide (3b)

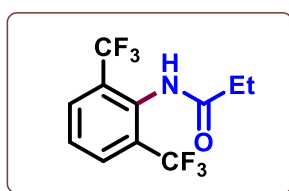

**Unknown compound.** Yield: 75%, 0.257 g. White solid, mp 82-85 °C.  $^1\text{H}$  NMR (500 MHz,  $\text{CDCl}_3$ ):  $\delta_{\text{H}} = 7.93$  (d,  $J = 8.0$  Hz, 2H),  $7.61$  (t,  $J = 7.9$  Hz, 1H),  $7.08$  (s, 1H),  $2.48$  (q,  $J = 7.6$  Hz, 2H),  $1.29$  (t,  $J = 7.6$  Hz, 3H).  $^{13}\text{C}$  NMR (125 MHz,  $\text{CDCl}_3$ ):  $\delta_{\text{C}} = 173.78, 132.77, 131.24, 131.00, 130.75, 130.51, 130.01, 129.98, 129.94, 129.90, 128.20, 123.30, 121.12, 118.94, 29.16, 8.93$ .  $^{19}\text{F}$  NMR (376 MHz,  $\text{CDCl}_3$ ):  $\delta_{\text{F}} = -61.39$ . MS (ESI)  $m/z$ :  $[\text{M}+\text{H}]^+$  286.06. HRMS (ESI)  $m/z$   $[\text{M}+\text{H}]^+$ : calcd for  $\text{C}_{11}\text{H}_{10}\text{F}_6\text{NO}$ , 286.0661; found, 286.0664.

### *N*-(2,4,6-tris(trifluoromethyl)phenyl)propionamide (3c)



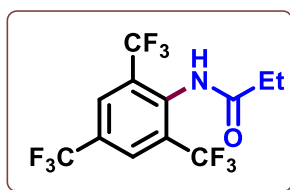

**Unknown compound.** Yield: 45%, 0.263 g. White solid.  $^1\text{H}$  NMR (500 MHz,  $\text{CDCl}_3$ ):  $\delta_{\text{H}} = 8.41$  (s, 2H), 7.98 (s, 1H), 2.36 (q,  $J = 7.2$  Hz, 2H), 1.31 (t,  $J = 7.1$  Hz, 3H).  $^{13}\text{C}$  NMR (125 MHz,  $\text{CDCl}_3$ ):  $\delta_{\text{C}} = 171.36$ , 132.99, 132.57, 132.05, 130.54, 129.36, 124.67, 123.41, 29.28, 9.59.  $^{19}\text{F}$  NMR (376 MHz,  $\text{CDCl}_3$ ):  $\delta_{\text{F}} = -60.77$ ,  $-62.41$ . MS (ESI)  $m/z$ :  $[\text{M}+\text{H}]^+$  340.0. HRMS (ESI)  $m/z$   $[\text{M}+\text{H}]^+$ : calcd for  $\text{C}_{12}\text{H}_9\text{F}_9\text{NO}$ , 354.05349; found, 354.05350.

Compounds **3d**, yield 82%, 0.211 g, ratio **3d-a:3d-b:3d-c** = 3:3:2

**N-(2-(trifluoromethyl)phenyl)propionamide (3d-a)**

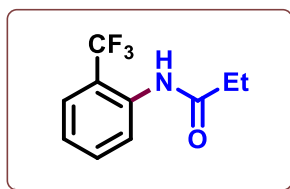

**Known compound.**<sup>41</sup> White solid.  $^1\text{H}$  NMR (400 MHz,  $\text{CDCl}_3$ ):  $\delta_{\text{H}} = 8.34$  (s, 1H), 8.03 (d,  $J = 7.8$  Hz, 1H), 7.64 (d,  $J = 7.9$  Hz, 1H), 7.50 (t,  $J = 7.5$  Hz, 1H), 7.23 (t,  $J = 7.4$  Hz, 1H), 2.46 (q,  $J = 7.5$  Hz, 2H), 1.27 (t,  $J = 7.4$  Hz, 3H).  $^{13}\text{C}$  NMR (100 MHz,  $\text{CDCl}_3$ ):  $\delta_{\text{C}} = 173.70$ , 135.50, 133.24, 128.52, 126.71, 126.66, 126.62, 126.57, 126.18, 125.79, 125.59, 123.08, 120.34, 30.95, 10.00.  $^{19}\text{F}$  NMR (376 MHz,  $\text{CDCl}_3$ ):  $\delta_{\text{F}} = -60.68$ . MS (ESI)  $m/z$ :  $[\text{M}+\text{H}]^+$  218.1. HRMS-ESI ( $m/z$ ): calcd for  $\text{C}_{10}\text{H}_{11}\text{F}_3\text{NO}$   $[\text{M}+\text{H}]^+$  : 218.0787; found: 218.0790.

**N-(3-(trifluoromethyl)phenyl)propionamide (3d-b)**

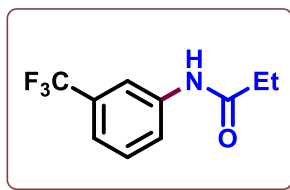

**Known compound.**<sup>21</sup> White solid.  $^1\text{H}$  NMR (400 MHz,  $\text{CDCl}_3$ ):  $\delta_{\text{H}} = 7.85$  (s, 1H), 7.70 (d,  $J = 7.8$  Hz, 1H), 7.52 (s, 1H), 7.34 (m, 2H), 2.37 (q,  $J = 7.6$  Hz, 2H), 1.20 (t,  $J = 7.5$  Hz, 3H).  $^{13}\text{C}$  NMR (100 MHz,  $\text{CDCl}_3$ ):  $\delta_{\text{C}} = 173.70$ , 139.29, 132.17, 131.84, 131.52, 131.20, 128.72, 127.73, 126.08, 123.57, 123.32, 121.06, 120.62, 117.25, 31.03, 10.00.  $^{19}\text{F}$  NMR (376 MHz,  $\text{CDCl}_3$ ):  $\delta_{\text{F}} = -62.79$ . MS (ESI)  $m/z$ :  $[\text{M}+\text{H}]^+$  218.1. HRMS-ESI ( $m/z$ ): calcd for  $\text{C}_{10}\text{H}_{11}\text{F}_3\text{NO}$   $[\text{M}+\text{H}]^+$ : 218.0787; found: 218.0790.

**N-(4-(trifluoromethyl)phenyl)propionamide (3d-c)**

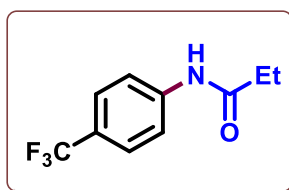

**Known compound.**<sup>42</sup> White solid. <sup>1</sup>H NMR (400 MHz, CDCl<sub>3</sub>): δ<sub>H</sub> = 8.32 (s, 1H), 7.60 (d, *J* = 7.8 Hz, 2H), 7.50 (d, *J* = 7.9 Hz, 2H), 2.38 (q, *J* = 7.5 Hz, 2H), 1.20 (t, *J* = 7.5 Hz, 3H). <sup>13</sup>C NMR (100 MHz, CDCl<sub>3</sub>): δ<sub>C</sub> = 173.40, 141.88, 128.57, 126.67, 126.61, 126.56, 126.48, 126.03, 125.84, 123.13, 120.38, 120.05, 31.15, 9.96. <sup>19</sup>F NMR (376 MHz, CDCl<sub>3</sub>): δ<sub>F</sub> = -62.34. MS (ESI) *m/z*: [M+H]<sup>+</sup> 218.1. HRMS-ESI (*m/z*): calcd for C<sub>10</sub>H<sub>11</sub>F<sub>3</sub>NO [M+H]<sup>+</sup> : 218.0787; found: 218.0790.

#### ***N*-(2-chloro-5-(trifluoromethyl)phenyl)propionamide (3e)**

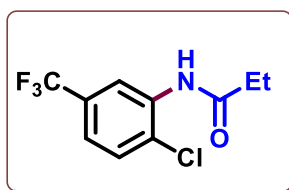

**Unknown compound.** 87%, 0.263 g. White solid, mp 79-82 °C. <sup>1</sup>H NMR (500 MHz, CDCl<sub>3</sub>): δ<sub>H</sub> = 8.77 (s, 1H), 7.77 (s, 1H), 7.49 (d, *J* = 8.5 Hz, 1H), 7.29 (dd, *J* = 8.5 Hz, 1H), 2.52 (q, *J* = 7.5 Hz, 2H), 1.29 (t, *J* = 7.5 Hz, 3H). <sup>13</sup>C NMR (125 MHz, CDCl<sub>3</sub>): δ<sub>C</sub> = 171.77, 134.64, 130.08, 129.82, 129.56, 129.29, 128.86, 126.22, 125.25, 124.05, 121.89, 120.44, 120.41, 117.90, 30.37, 8.78. <sup>19</sup>F NMR (376 MHz, CDCl<sub>3</sub>) δ = -62.77. MS (ESI) *m/z*: [M+H]<sup>+</sup> 252.0. HRMS-ESI (*m/z*): calcd for C<sub>10</sub>H<sub>10</sub>ClF<sub>3</sub>NO [M+H]<sup>+</sup>: 252.0397; found: 252.0394.

#### ***N*-(4-fluorophenyl)propionamide (3f)**

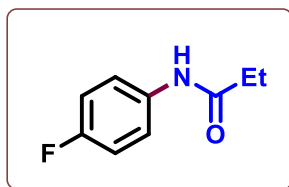

**Known compound.**<sup>42</sup> Yield: 72%, 0.144 g. Brown solid, mp 132-133 °C. <sup>1</sup>H NMR (400 MHz, CDCl<sub>3</sub>): δ<sub>H</sub> = 7.69 (s, 1H), 7.42 (dd, *J* = 8.9 Hz, 3.5 Hz, 2H), 6.97 – 6.92 (m, 2H), 2.36 (q, *J* = 7.6 Hz, 2H), 1.24 (t, *J* = 7.6 Hz, 3H). <sup>13</sup>C NMR (100 MHz, CDCl<sub>3</sub>): δ<sub>C</sub> = 172.59, 160.25, 157.70, 134.00, 121.93, 121.81, 115.55, 115.26, 30.37, 9.66. <sup>19</sup>F NMR (376 MHz, CDCl<sub>3</sub>): δ<sub>F</sub> = -120.78. MS (ESI) *m/z*: [M+H]<sup>+</sup> 168.08. HRMS-ESI (*m/z*): calcd for C<sub>9</sub>H<sub>11</sub>FNO [M+H]<sup>+</sup>: 168.0819, found 168.0817.

#### ***N*-(4-chlorophenyl)propionamide (3g)**

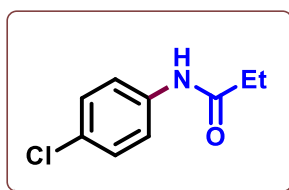

**Known compound.**<sup>23</sup> Yield: 45%, 0.099 g. Brown solid, mp 134-137 °C. <sup>1</sup>H NMR (400 MHz, CDCl<sub>3</sub>): δ<sub>H</sub> = 7.70 (s, 1H), 7.51 (d, *J* = 8.9 Hz, 2H), 7.30 (d, *J* = 8.9 Hz, 2H), 2.43 (q, *J* = 7.6 Hz, 2H), 1.27 (t, *J* = 7.6 Hz, 3H). <sup>13</sup>C NMR (100 MHz, CDCl<sub>3</sub>): δ<sub>C</sub> = 172.61, 136.82, 129.33, 129.13, 121.41, 30.82, 9.83. MS (ESI) *m/z*: [M+H]<sup>+</sup> 184.05. HRMS-ESI (*m/z*): calcd for C<sub>9</sub>H<sub>11</sub>ClNO [M+H]<sup>+</sup>: 184.0524; found: 184.0522.

#### ***N*-(3,4-dichlorophenyl)propionamide (3h-a)**

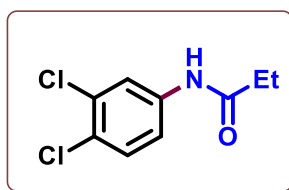

**Known compound.**<sup>43</sup> Yield: 51%, 0.133 g. White solid, mp 90-92°C. <sup>1</sup>H NMR (400 MHz, CDCl<sub>3</sub>): δ<sub>H</sub> = 7.78 (s, 1H), 7.35 – 7.34 (m, 1H), 7.32 (s, 2H), 2.42 (q, *J* = 7.5 Hz, 2H), 1.26 (t, *J* = 7.6 Hz, 3H). <sup>13</sup>C NMR (100 MHz, CDCl<sub>3</sub>): δ<sub>C</sub> = 171.39, 136.66, 132.08, 129.77, 120.73, 118.24, 28.94, 8.75. MS (ESI) *m/z*: [M+H]<sup>+</sup> 218.01. HRMS-ESI (*m/z*): calcd for C<sub>9</sub>H<sub>10</sub>Cl<sub>2</sub>NO [M+H]<sup>+</sup>: 218.0134; found: 218.0134.

#### ***N*-(2,3-dichlorophenyl)propionamide (3h-b)**

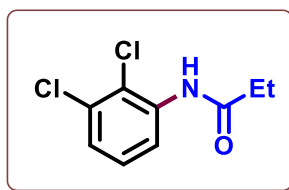

**Unknown compound.** Yield: 17%, 0.044 g. White solid. <sup>1</sup>H NMR (400 MHz, CDCl<sub>3</sub>): δ<sub>H</sub> = 7.88 (s, 1H), 7.70 (dd, *J* = 8.1, 2.2 Hz, 1H), 7.37 (dd, *J* = 8.0, 2.2 Hz, 1H), 7.32 (d, *J* = 8.0 Hz, 1H), 2.53 (q, *J* = 7.6 Hz, 2H), 1.17 (t, *J* = 7.6 Hz, 3H). <sup>13</sup>C NMR (100 MHz, CDCl<sub>3</sub>): δ<sub>C</sub> = 172.13, 137.12, 134.84, 128.59, 124.84, 123.51, 119.98, 31.31, 9.78. MS (ESI) *m/z*: [M+H]<sup>+</sup> 218.01. HRMS-ESI (*m/z*): calcd for C<sub>9</sub>H<sub>10</sub>Cl<sub>2</sub>NO [M+H]<sup>+</sup>: 218.0134; found: 218.0136.

#### ***N*-(5-chloro-2-hydroxyphenyl)propionamide (3i)**

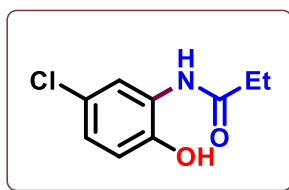

**Unknown compound.** Yield: 25%, 0.055 g. White solid.  $^1\text{H}$  NMR (400 MHz,  $\text{CDCl}_3$ ):  $\delta_{\text{H}} = 7.29$  (s, 1H), 7.15 (d,  $J = 2.5$  Hz, 1H), 7.08 (dd,  $J = 8.7, 2.5$  Hz, 1H), 7.02 (s, 1H), 6.94 (d,  $J = 8.5$  Hz, 1H), 2.51 (q,  $J = 7.6$  Hz, 2H), 1.30 (t,  $J = 7.6$  Hz, 3H).  $^{13}\text{C}$  NMR (100 MHz,  $\text{CDCl}_3$ ):  $\delta_{\text{C}} = 172.15, 147.80, 126.90, 124.06, 122.95, 120.96, 116.11, 30.68, 9.57$ . MS (ESI)  $m/z$ :  $[\text{M}+\text{H}]^+$  200.0. HRMS-ESI ( $m/z$ ): calcd for  $\text{C}_9\text{H}_{11}\text{ClNO}_2$   $[\text{M}+\text{H}]^+$ : 200.0473; found: 200.0475.

### 5-chloro-2-ethylbenzo[d]oxazole (3ii)

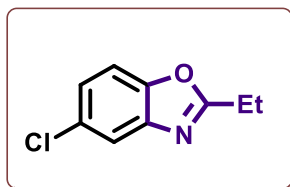

**Known compound.**<sup>26</sup> Yield: 49%, 0.107 g. White solid, mp 35-38°C.  $^1\text{H}$  NMR (500 MHz,  $\text{CDCl}_3$ ):  $\delta_{\text{H}} = 7.67$  (d,  $J = 2.1$  Hz, 1H), 7.41 (d,  $J = 8.5$  Hz, 1H), 7.29 (dd,  $J = 8.6, 2.1$  Hz, 1H), 2.98 (q,  $J = 7.6$  Hz, 2H), 1.47 (t,  $J = 7.6$  Hz, 3H).  $^{13}\text{C}$  NMR (125 MHz,  $\text{CDCl}_3$ ):  $\delta_{\text{C}} = 169.11, 148.93, 142.04, 129.06, 124.23, 119.09, 110.46, 21.71, 10.29$ . MS (ESI)  $m/z$ :  $[\text{M}+\text{H}]^+$  182.0. HRMS-ESI ( $m/z$ ): calcd for  $\text{C}_9\text{H}_9\text{ONCl}$   $[\text{M}+\text{H}]^+$ : 182.0367; found: 182.0366.

### N-(5-bromo-2-hydroxyphenyl)propionamide (3j)

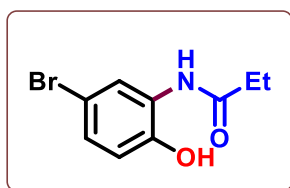

**Unknown compound.** 12%, 0.035 g. Brown solid.  $^1\text{H}$  NMR (400 MHz,  $\text{CDCl}_3$ ):  $\delta_{\text{H}} = 7.78$  (s, 1H), 7.43 (dd,  $J = 4.6, 2.2$  Hz, 1H), 7.17 (dd,  $J = 8.7, 2.4$  Hz, 1H), 7.16 (s, 1H), 6.86 (d,  $J = 8.6$  Hz, 1H), 2.50 (q,  $J = 7.5$  Hz, 2H), 1.28 (t,  $J = 7.2$  Hz, 3H).  $^{13}\text{C}$  NMR (100 MHz,  $\text{CDCl}_3$ ):  $\delta_{\text{C}} = 172.00, 147.84, 129.69, 127.68, 124.96, 117.50, 112.43, 30.68, 10.21$ . MS (ESI)  $m/z$ :  $[\text{M}+\text{H}]^+$  244.0. HRMS-ESI ( $m/z$ ): calcd for  $\text{C}_9\text{H}_{11}\text{BrNO}_2$   $[\text{M}+\text{H}]^+$ : 243.9967; found: 243.9967.

### 5-bromo-2-ethylbenzo[d]oxazole (3jj)

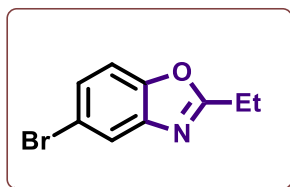

**Known compound.**<sup>26</sup> Yield: 61%, 0.165 g. White solid, mp 46-48 °C.  $^1\text{H}$  NMR (500 MHz,  $\text{CDCl}_3$ ):  $\delta_{\text{H}} = 7.83$  (d,  $J = 8.7$  Hz, 1H), 7.44 (dd,  $J = 8.6, 1.9$  Hz, 1H), 7.38 (d,  $J = 8.6$  Hz, 1H), 2.99 (q,  $J = 7.6$  Hz, 2H), 1.47 (t,  $J = 7.6$  Hz, 3H).  $^{13}\text{C}$  NMR (125 MHz,  $\text{CDCl}_3$ ):  $\delta_{\text{C}} = 169.79, 149.76, 143.237, 127.82, 122.94, 117.19, 111.90, 22.60, 10.98$ .  $^{13}\text{C}$  NMR (125 MHz,  $\text{CDCl}_3$ ):  $\delta_{\text{C}} = 169.16, 149.24, 141.99, 127.16, 121.93,$

116.49, 111.07, 21.64, 10.25. MS (ESI)  $m/z$ :  $[M+H]^+$  226.0. HRMS-ESI ( $m/z$ ): calcd for  $C_9H_9ONBr$   $[M+H]^+$ : 225.9862; found: 225.9862.

### ***N*-phenylpropionamide (3k-a)**

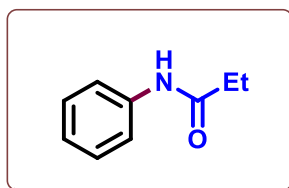

**Known compound.**<sup>42</sup> Yield: 71%, 0.125 g. White solid, mp 101-104 °C.  $^1H$  NMR (400 MHz,  $CDCl_3$ ):  $\delta_H$  = 7.54 (d,  $J$  = 7.6 Hz, 2H), 7.40 (s, 1H), 7.35 (t,  $J$  = 7.9 Hz, 2H), 7.04 (t,  $J$  = 7.4 Hz, 1H), 2.40 (q,  $J$  = 7.6, 2H), 1.15 (t,  $J$  = 7.6, 3H).  $^{13}C$  NMR (100 MHz,  $CDCl_3$ ):  $\delta_C$  = 172.24, 138.09, 129.13, 124.22, 120.03, 30.80, 9.77. MS (ESI)  $m/z$ :  $[M+H]^+$  150.1. HRMS-ESI ( $m/z$ ): calcd for  $C_9H_{12}NO$   $[M+H]^+$ : 159.0913; found: 159.0914.

Compounds **3l**, yield 73%, 0.152 g, ratio **3l-a:3l-b:3l-c** = 3:1:2

### ***N*-(2-cyanophenyl)propionamide (3l-a)**

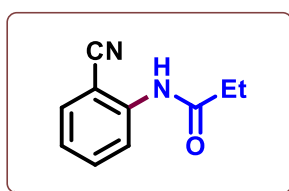

**Known compound.**<sup>21</sup> White solid.  $^1H$  NMR (400 MHz,  $CDCl_3$ ):  $\delta_H$  = 11.17 (s, 1H), 8.71 (dd,  $J$  = 8.5 Hz, 1H), 8.06 (dd,  $J$  = 8.0, 1.7 Hz, 1H), 7.58 – 7.53 (m, 1H), 7.12 – 7.08 (m, 1H), 2.51 (q,  $J$  = 7.6 Hz, 2H), 1.43 (t,  $J$  = 7.6 Hz, 3H).  $^{13}C$  NMR (100 MHz,  $CDCl_3$ ):  $\delta_C$  = 173.70, 142.64, 135.91, 132.21, 123.08, 118.98, 114.52, 32.25, 10.10. MS (ESI)  $m/z$ :  $[M+H]^+$  175.1. HRMS-ESI ( $m/z$ ): calcd for  $C_{10}H_{11}N_2O$   $[M+H]^+$ : 175.0866; found: 175.0867.

### ***N*-(3-cyanophenyl)propionamide (3l-b)**

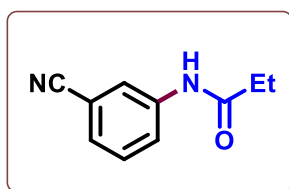

**Known compound.**<sup>21</sup> White solid.  $^1H$  NMR (400 MHz,  $CDCl_3$ ):  $\delta_H$  = 7.95 (s, 1H), 7.74 (d,  $J$  = 8 Hz, 1H), 7.44 – 7.37 (m, 3H), 2.45 (q,  $J$  = 7.6 Hz, 2H), 1.30 (t,  $J$  = 7.6 Hz, 3H).  $^{13}C$  NMR (100 MHz,  $CDCl_3$ ):  $\delta_C$  =  $\delta$  171.34, 139.34, 130.41, 128.14, 121.00, 119.35, 118.31, 113.56, 29.23, 9.97. MS (ESI)  $m/z$ :  $[M+H]^+$  175.1. HRMS-ESI ( $m/z$ ): calcd for  $C_{10}H_{11}N_2O$   $[M+H]^+$ : 175.0866; found: 175.0867.

### ***N*-(4-cyanophenyl)propionamide (3l-c)**

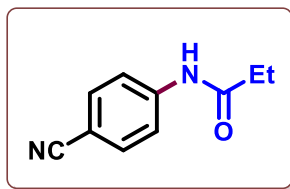

**Known compound.**<sup>44</sup> White solid. <sup>1</sup>H NMR (400 MHz, CDCl<sub>3</sub>):  $\delta_{\text{H}} = 7.68$  (d,  $J = 8.9$ , 2H),  $7.62$  (d,  $J = 8.9$  Hz, 2H),  $7.45$  (s, 1H),  $2.46$  (q,  $J = 7.6$  Hz, 2H),  $1.28$  (t,  $J = 7.6$  Hz, 3H). <sup>13</sup>C NMR (100 MHz, CDCl<sub>3</sub>):  $\delta_{\text{C}} = 172.97$ ,  $142.57$ ,  $133.83$ ,  $120.01$ ,  $107.55$ ,  $31.36$ ,  $9.90$ . MS (ESI)  $m/z$ :  $[M+H]^+$  175.1. HRMS-ESI ( $m/z$ ): calcd for C<sub>10</sub>H<sub>11</sub>N<sub>2</sub>O [M+H]<sup>+</sup>: 175.0866; found: 175.0867.

Compounds **3m**, yield 68%, 0.159 g, ratio **3m-a:3m-b:3m-c** = 3.2:1:1

**N-(2-nitrophenyl)propionamide (3m-a)**

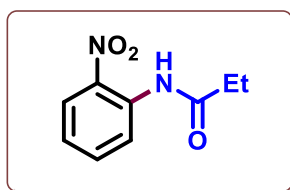

**Known compound.**<sup>42</sup> Yield: 42%, 0.098 g. Yellow solid, mp 63-65 °C. <sup>1</sup>H NMR (400 MHz, CDCl<sub>3</sub>):  $\delta_{\text{H}} = 9.47$  (s, 1H),  $8.80$  (dd,  $J = 9.7$ , 1.8 Hz, 1H),  $8.21$  (dd,  $J = 9.5$ , 1.7 Hz, 1H),  $7.65$  (t,  $J = 7.8$  Hz, 1H),  $7.19$  (t,  $J = 7.8$  Hz, 1H),  $2.56$  (q,  $J = 7.5$  Hz, 2H),  $1.31$  (t,  $J = 7.6$  Hz, 3H). <sup>13</sup>C NMR (100 MHz, CDCl<sub>3</sub>):  $\delta_{\text{C}} = 172.75$ ,  $136.14$ ,  $135.93$ ,  $134.89$ ,  $125.61$ ,  $122.95$ ,  $120.01$ ,  $30.80$ ,  $9.78$ . MS (ESI)  $m/z$ :  $[M+H]^+$  195.1. HRMS-ESI ( $m/z$ ): calcd for C<sub>9</sub>H<sub>11</sub>N<sub>2</sub>O<sub>3</sub> [M+H]<sup>+</sup>: 195.0764; found: 195.0764.

**N-(3-nitrophenyl)propionamide (3m-b)**

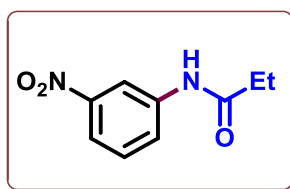

**Known compound.**<sup>45</sup> Yield: 13%, 0.033 g. Yellow solid, mp 100-102 °C. <sup>1</sup>H NMR (400 MHz, CDCl<sub>3</sub>):  $\delta_{\text{H}} = 8.39$  (s, 1H),  $7.98 - 7.94$  (m, 2H),  $7.83$  (s, 1H),  $7.48$  (t,  $J = 8.2$  Hz, 1H),  $2.47$  (q,  $J = 7.6$  Hz, 2H),  $1.27$  (t,  $J = 7.5$  Hz, 3H). <sup>13</sup>C NMR (100 MHz, CDCl<sub>3</sub>):  $\delta_{\text{C}} = 173.30$ ,  $148.17$ ,  $139.14$ ,  $129.55$ ,  $125.56$ ,  $118.42$ ,  $114.39$ ,  $30.36$ ,  $9.34$ . MS (ESI)  $m/z$ :  $[M+H]^+$  195.1. HRMS-ESI ( $m/z$ ): calcd for C<sub>9</sub>H<sub>11</sub>N<sub>2</sub>O<sub>3</sub> [M+H]<sup>+</sup>: 195.0764; found: 195.0765.

**N-(4-nitrophenyl)propionamide (3m-c)**

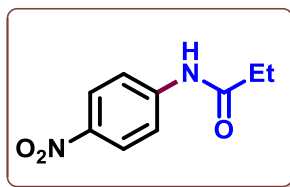

**Known compound.**<sup>46</sup> Yield: 13%, 0.03 g. Yellow solid, mp 69-72 °C. <sup>1</sup>H NMR (400 MHz, CDCl<sub>3</sub>): δ<sub>H</sub> = 8.20 (d, *J* = 9.2 Hz, 2H), 7.78 (s, 1H), 7.73 (d, *J* = 9.2 Hz, 2H), 2.47 (q, *J* = 7.5 Hz, 2H), 1.27 (t, *J* = 7.5 Hz, 3H). <sup>13</sup>C NMR (100 MHz, CDCl<sub>3</sub>): δ<sub>C</sub> = 173.69, 145.90, 142.47, 125.48, 118.83, 30.17, 9.67. MS (ESI) *m/z*: [M+H]<sup>+</sup> 195.1. HRMS-ESI (*m/z*): calcd for C<sub>9</sub>H<sub>11</sub>N<sub>2</sub>O<sub>3</sub> [M+H]<sup>+</sup>: 195.0764; found: 195.0765.

Compounds **3n**, yield 80%, 0.217 g, ratio **3n-a**:**3n-b** = 2.2:1

***N*-(4-chloro-3-nitrophenyl)propionamide (3n-a)**

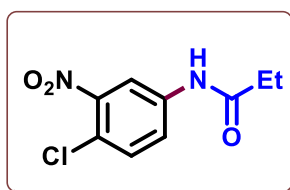

**Unknown compound.** Yield: 58%. Brown solid. <sup>1</sup>H NMR (500 MHz, CDCl<sub>3</sub>): δ<sub>H</sub> = 8.18 (d, *J* = 2.43 Hz, 1H), 7.73 (dd, *J* = 8.78, 2.43 Hz, 1H), 7.54 (s, 1H), 7.48 (d, *J* = 8.78 Hz, 1H), 2.45 (q, *J* = 7.58 Hz, 2H), 1.28 (t, *J* = 7.58 Hz, 3H). <sup>13</sup>C NMR (125 MHz, CDCl<sub>3</sub>): δ<sub>C</sub> = 171.82, 147.40, 137.04, 131.59, 123.26, 120.71, 115.75, 30.12, 8.80. MS (ESI) *m/z*: [M+H]<sup>+</sup> 229.0. HRMS-ESI (*m/z*): calcd for C<sub>9</sub>H<sub>10</sub>ClN<sub>2</sub>O<sub>3</sub> [M+H]<sup>+</sup>:229.0375; found: 229.0375.

***N*-(2-chloro-3-nitrophenyl)propionamide (3n-b)**

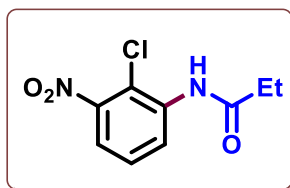

**Unknown compound.** Yield: 22%. Brown solid. <sup>1</sup>H NMR (500 MHz, CDCl<sub>3</sub>): δ<sub>H</sub> = 8.69 (dd, *J* = 8.38, 1.43 Hz, 1H), 7.84 (s, 1H), 7.59 (dd, *J* = 8.16, 1.43 Hz, 1H), 7.44 (t, *J* = 8.4 Hz, 1H), 2.55 (q, *J* = 7.52 Hz, 2H), 1.32 (t, *J* = 7.52 Hz, 3H). <sup>13</sup>C NMR (125 MHz, CDCl<sub>3</sub>): δ<sub>C</sub> = 171.73, 147.96, 136.09, 127.31, 124.25, 119.26, 114.51, 30.55, 8.87. MS (ESI) *m/z*: [M+H]<sup>+</sup> 229.0. HRMS-ESI (*m/z*): calcd for C<sub>9</sub>H<sub>10</sub>ClN<sub>2</sub>O<sub>3</sub> [M+H]<sup>+</sup>:229.0375; found: 229.0377.

***N*-(2-chloro-5-nitrophenyl)propionamide (3o)**

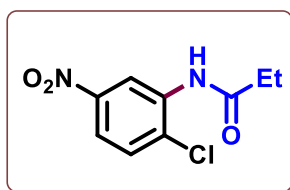

**Unknown compound.** Yield: 85%, 0.233 g. Yellow solid, mp 116-120 °C.  $^1\text{H}$  NMR (500 MHz,  $\text{CDCl}_3$ ):  $\delta_{\text{H}} = 9.39$  (d,  $J = 2.59$  Hz, 1H), 7.93 (dd,  $J = 8.75$  Hz, 1H), 7.75 (s, 1H), 7.56 (d,  $J = 8.74$  Hz, 1H), 2.55 (q,  $J = 7.54$  Hz, 2H), 1.33 (t,  $J = 7.54$  Hz).  $^{13}\text{C}$  NMR (125 MHz,  $\text{CDCl}_3$ ):  $\delta_{\text{C}} = 171.50, 146.73, 135.04, 128.92, 127.79, 118.30, 115.70, 30.45, 8.76$ . MS (ESI)  $m/z$ :  $[\text{M}+\text{H}]^+$  229.0. HRMS-ESI ( $m/z$ ): calcd for  $\text{C}_9\text{H}_{10}\text{ClN}_2\text{O}_3$   $[\text{M}+\text{H}]^+$ : 229.0375; found: 229.0378.

### ***N*-(2-fluoro-5-nitrophenyl)propionamide (3p)**

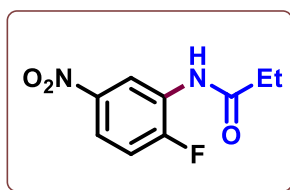

**Unknown compound.** Yield: 72%, 0.255 g. Yellow solid, mp 98-102 °C.  $^1\text{H}$  NMR (500 MHz,  $\text{CDCl}_3$ ):  $\delta_{\text{H}} = 9.35$  (dd,  $J = 6.82, 2.79$  Hz, 1H), 8.00 (ddd,  $J = 9.07, 4.65, 2.79$  Hz, 1H), 7.47 (s, 1H), 7.25 (dd,  $J = 9.93, 9.07$  Hz, 1H), 2.52 (q,  $J = 7.53$  Hz, 2H), 1.31 (t,  $J = 7.53$  Hz, 3H).  $^{13}\text{C}$  NMR (125 MHz,  $\text{CDCl}_3$ ):  $\delta_{\text{C}} = 171.57, 155.67, 153.66, 144.08, 126.85, 126.76, 119.13, 119.06, 116.75, 114.82, 114.63, 30.24, 8.73$ .  $^{19}\text{F}$  NMR (376 MHz,  $\text{CDCl}_3$ ):  $\delta_{\text{F}} = -121.72$ . MS (ESI)  $m/z$ :  $[\text{M}+\text{H}]^+$  213.1. HRMS-ESI ( $m/z$ ): calcd for  $\text{C}_9\text{H}_{10}\text{FN}_2\text{O}_3$   $[\text{M}+\text{H}]^+$ : 213.0670; found: 213.0669.

### ***N*-(2-bromo-5-nitrophenyl)propionamide (3q)**

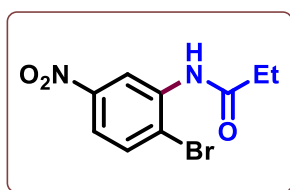

**Unknown compound.** Yield: 57%, 0.186 g. Yellow solid.  $^1\text{H}$  NMR (400 MHz,  $\text{CDCl}_3$ ):  $\delta_{\text{H}} = 9.30$  (d,  $J = 2.7$  Hz, 1H), 7.84 (dd,  $J = 8.8, 2.7$  Hz, 1H), 7.77 (s, 1H), 7.72 (d,  $J = 8.8$  Hz, 1H), 2.54 (q,  $J = 7.5$  Hz, 2H), 1.31 (t,  $J = 7.6$  Hz, 3H).  $^{13}\text{C}$  NMR (100 MHz,  $\text{CDCl}_3$ ):  $\delta_{\text{C}} = 172.73, 148.39, 137.26, 133.27, 119.92, 119.70, 116.84, 31.52, 9.84$ . MS (ESI)  $m/z$ :  $[\text{M}+\text{H}]^+$  273.0. HRMS-ESI ( $m/z$ ): calcd for  $\text{C}_9\text{H}_{10}\text{BrN}_2\text{O}_3$   $[\text{M}+\text{H}]^+$ : 272.9869; found: 272.9870.

Compounds **3r**, yield 82%, 0.218 g, ratio **3r-a:3r-b:3r-c** = 2:2:1

### **Ethyl 2-propionamidobenzoate (3r-a)**



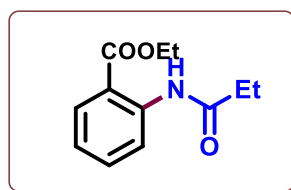

**Unknown compound.** White solid.  $^1\text{H}$  NMR (400 MHz,  $\text{CDCl}_3$ ):  $\delta_{\text{H}} = 11.17$  (s, 1H), 8.74 (d,  $J = 8.5$  Hz, 1H), 8.12 (dd,  $J = 8.0, 1.7$  Hz, 1H), 7.62 – 7.55 (m, 1H), 7.10 (td,  $J = 7.7, 1.2$  Hz, 1H), 4.36 (q,  $J = 7.1$  Hz, 2H), 2.49 (q,  $J = 7.6$  Hz, 2H), 1.39 (t,  $J = 6.7$  Hz, 3H), 1.26 (t,  $J = 7.1$  Hz, 3H).  $^{13}\text{C}$  NMR (100 MHz,  $\text{CDCl}_3$ ):  $\delta_{\text{C}} = 172.91, 170.81, 140.94, 134.55, 131.72, 122.79, 119.55, 116.41, 62.08, 31.09, 14.61, 9.82$ . MS (ESI)  $m/z$ :  $[\text{M}+\text{H}]^+$  222.1. HRMS-ESI ( $m/z$ ): calcd for  $\text{C}_{12}\text{H}_{16}\text{NO}_3$   $[\text{M}+\text{H}]^+$ : 222.1125; found: 222.1124.

### Ethyl 3-propionamidobenzoate (3r-b)

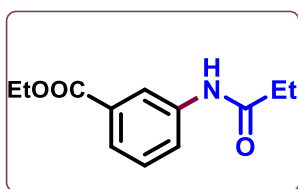

**Unknown compound.** White solid.  $^1\text{H}$  NMR (400 MHz,  $\text{CDCl}_3$ ):  $\delta_{\text{H}} = 8.44$  (s, 1H), 8.03 (d,  $J = 6.4$  Hz, 1H), 7.95 (s, 1H), 7.82 (d,  $J = 6.2$  Hz, 1H), 7.45 (t,  $J = 6.3$  Hz, 1H), 4.39 (q,  $J = 5.1$  Hz, 2H), 2.44 (q,  $J = 5.7$  Hz, 2H), 1.40 (t,  $J = 5.1$  Hz, 3H), 1.19 (t,  $J = 5.7$  Hz, 3H).  $^{13}\text{C}$  NMR (100 MHz,  $\text{CDCl}_3$ ):  $\delta_{\text{C}} = 172.06, 166.20, 138.59, 130.98, 127.87, 125.50, 124.79, 124.41, 60.83, 30.50, 14.06, 9.91$ . MS (ESI)  $m/z$ :  $[\text{M}+\text{H}]^+$  222.1. HRMS-ESI ( $m/z$ ): calcd for  $\text{C}_{12}\text{H}_{16}\text{NO}_3$   $[\text{M}+\text{H}]^+$ : 222.1125; found: 222.1126.

### Ethyl 4-propionamidobenzoate (3r-c)

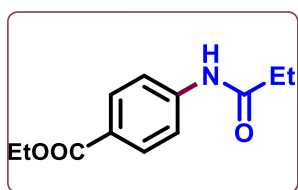

**Unknown compound.** White solid.  $^1\text{H}$  NMR (400 MHz,  $\text{CDCl}_3$ ):  $\delta_{\text{H}} = 8.00$  (d,  $J = 6.9$  Hz, 1H), 7.94 (s, 1H), 7.67 (d,  $J = 6.8$  Hz, 1H), 4.39 (q,  $J = 5.1$  Hz, 2H), 2.39 (q,  $J = 5.7$  Hz, 2H), 1.40 (t,  $J = 5.1$  Hz, 3H), 1.15 (t,  $J = 5.7$  Hz, 3H).  $^{13}\text{C}$  NMR (100 MHz,  $\text{CDCl}_3$ ):  $\delta_{\text{C}} = 171.98, 166.15, 142.09, 130.53, 120.74, 118.51, 60.62, 30.36, 14.06, 9.44$ . MS (ESI)  $m/z$ :  $[\text{M}+\text{H}]^+$  222.1. HRMS-ESI ( $m/z$ ): calcd for  $\text{C}_{12}\text{H}_{16}\text{NO}_3$   $[\text{M}+\text{H}]^+$ : 222.1125; found: 222.1126.

### Dimethyl 4-propionamidoisophthalate (3s-a)

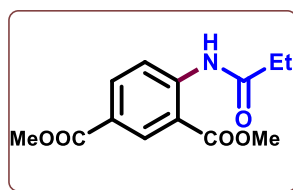

**Unknown compound.** Yield: 38%, 0.121 g. Orange solid, mp 158-160 °C.  $^1\text{H}$  NMR (500 MHz,  $\text{CDCl}_3$ ):  $\delta_{\text{H}} = 11.33$  (s, 1H), 8.81 (d,  $J = 8.9$  Hz, 1H), 8.71 (d,  $J = 2.1$  Hz, 1H), 8.17 (dd,  $J = 8.9, 2.2$  Hz, 1H), 3.96 (s, 3H), 3.92 (s, 3H), 2.47 (q,  $J = 7.6$  Hz, 4H), 1.39 (t,  $J = 7.1$  Hz, 3H).  $^{13}\text{C}$  NMR (125 MHz,  $\text{CDCl}_3$ ):  $\delta_{\text{C}} = 172.58, 168.82, 166.80, 144.69, 135.72, 133.54, 125.02, 120.73, 115.75, 52.74, 52.45, 30.24, 9.65$ . MS (ESI)  $m/z$ :  $[\text{M}+\text{H}]^+$  266.1. HRMS-ESI ( $m/z$ ): calcd for  $\text{C}_{13}\text{H}_{16}\text{NO}_5$   $[\text{M}+\text{H}]^+$ : 266.1023; found: 266.1023.

### Dimethyl 2-propionamidophthalate (3s-b)

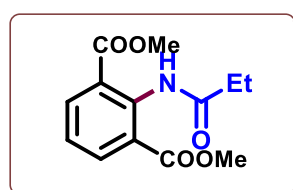

**Unknown compound.** Yield: 26%, 0.083 g. Orange solid.  $^1\text{H}$  NMR (500 MHz,  $\text{CDCl}_3$ ):  $\delta_{\text{H}} = 11.31$  (s, 1H), 8.06 (d,  $J = 7.8$  Hz, 2H), 6.53 (t,  $J = 7.8$  Hz, 1H), 3.93 (s, 6H), 2.50 (q,  $J = 7.6$  Hz, 2H), 1.27 (t,  $J = 7.6$  Hz, 3H).  $^{13}\text{C}$  NMR (125 MHz,  $\text{CDCl}_3$ ):  $\delta_{\text{C}} = 172.76, 169.30, 138.80, 133.84, 121.94, 121.23, 52.84, 29.28, 9.89$ . MS (ESI)  $m/z$ :  $[\text{M}+\text{H}]^+$  266.1. HRMS-ESI ( $m/z$ ): calcd for  $\text{C}_{13}\text{H}_{16}\text{NO}_5$   $[\text{M}+\text{H}]^+$ : 266.1023; found: 266.1023.

### *N*-(4-hydroxyphenyl)propionamide (3t)

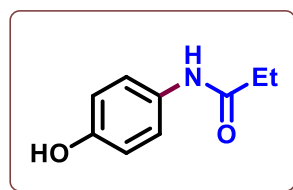

**Known compound.**<sup>47</sup> Yield: 73%, 0.145 g. White solid, mp 170-173 °C.  $^1\text{H}$  NMR (400 MHz,  $\text{DMSO-d}_6$ ):  $\delta_{\text{H}} = 8.21$  (s, 1H), 7.70 (s, 1H), 7.47 (d,  $J = 8.7$  Hz, 2H), 7.23 (d,  $J = 8.7$  Hz, 2H), 2.26 (q,  $J = 7.5$  Hz, 2H), 1.09 (t,  $J = 7.5$  Hz, 3H).  $^{13}\text{C}$  NMR (100 MHz,  $\text{DMSO-d}_6$ ):  $\delta_{\text{C}} = 171.32, 153.11, 131.14, 120.88, 115.08, 27.60, 9.89$ . MS (ESI)  $m/z$ :  $[\text{M}+\text{H}]^+$  166.1. HRMS-ESI ( $m/z$ ): calcd for  $\text{C}_9\text{H}_{12}\text{NO}_2$   $[\text{M}+\text{H}]^+$ : 166.0826; found: 166.0827.

### *N*-(4-hydroxy-3,5-dimethylphenyl)propionamide (3u)

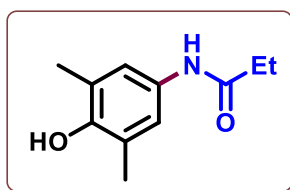

**Known compound.**<sup>48</sup> Yield: 65%, 0.151 g. White solid, mp 206-210 °C. <sup>1</sup>H NMR (400 MHz, DMSO-d<sub>6</sub>):  $\delta_{\text{H}}$  = 9.41 (s, 1H), 7.99 (s, 1H), 7.16 (s, 2H), 2.45 (q,  $J$  = 7.5 Hz, 2H), 2.15 (s, 6H), 1.15 (t,  $J$  = 7.5 Hz, 3H). <sup>13</sup>C NMR (100 MHz, DMSO-d<sub>6</sub>):  $\delta_{\text{C}}$  = 171.41, 148.99, 131.16, 124.47, 119.88, 29.58, 16.87, 9.94. MS (ESI)  $m/z$ : [M+H]<sup>+</sup> 194.1. HRMS-ESI ( $m/z$ ): calcd for C<sub>11</sub>H<sub>16</sub>NO<sub>2</sub> [M+H]<sup>+</sup>: 194.1176; found: 194.1176.

#### ***N*-(4-hydroxy-3-methylphenyl)propionamide (3v)**

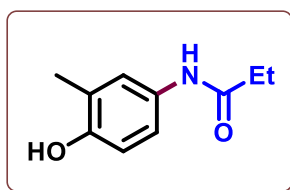

**Unknown compound.** Yield: 66%, 0.141 g. White solid, mp 137-139 °C. <sup>1</sup>H NMR (400 MHz, CD<sub>3</sub>CN):  $\delta_{\text{H}}$  = 8.91 (s, 1H), 8.49 (s, 1H), 7.26 (dd,  $J$  = 8.7, 2.1 Hz, 2H), 6.81 (d,  $J$  = 8.5 Hz), 2.42 (q,  $J$  = 7.5 Hz, 2H), 2.15 (s, 3H), 1.13 (t,  $J$  = 7.5 Hz, 3H). <sup>13</sup>C NMR (100 MHz, CD<sub>3</sub>CN):  $\delta_{\text{C}}$  = 172.13, 147.33, 132.49, 125.34, 122.78, 120.28, 117.27, 30.88, 16.32, 9.78. MS (ESI)  $m/z$ : [M+H]<sup>+</sup> 180.1. HRMS-ESI ( $m/z$ ): calcd for C<sub>10</sub>H<sub>14</sub>NO<sub>2</sub> [M+H]<sup>+</sup>: 180.1019; found: 180.1019.

#### **Methyl 2-hydroxy-5-propionamidobenzoate (3w)**

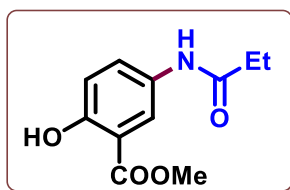

**Unknown compound.** Yield: 36%, 0.096 g. Brown solid, mp 121-124 °C. <sup>1</sup>H NMR (400 MHz, CDCl<sub>3</sub>):  $\delta_{\text{H}}$  = 8.72 (s, 1H), 8.06 (d,  $J$  = 1.2 Hz, 1H), 7.87 (s, 1H), 7.56 (dd,  $J$  = 7.9 Hz, 1H), 6.99 (d,  $J$  = 7.8 Hz, 1H), 3.93 (s, 3H), 2.46 (q,  $J$  = 7.3 Hz, 2H), 1.12 (t,  $J$  = 7.1 Hz, 3H). <sup>13</sup>C NMR (100 MHz, CDCl<sub>3</sub>):  $\delta_{\text{C}}$  = 172.78, 168.57, 159.12, 131.07, 125.82, 121.84, 116.14, 115.02, 52.98, 31.46, 11.14. MS (ESI)  $m/z$ : [M+H]<sup>+</sup> 224.1. HRMS-ESI ( $m/z$ ): calcd for C<sub>11</sub>H<sub>14</sub>NO<sub>4</sub> [M+H]<sup>+</sup>: 224.0917; found: 224.0917.

#### **Methyl 2-ethylbenzo[d]oxazole-7-carboxylate (3ww)**

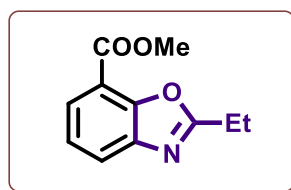

**Unknown compound.** Yield: 32%, 0.079 g. Brown oil.  $^1\text{H NMR}$  (400 MHz,  $\text{CDCl}_3$ ):  $\delta_{\text{H}} = 7.98$  (dd,  $J = 7.9, 1.2$  Hz, 1H),  $7.88$  (dd,  $J = 7.9$  Hz, 1H),  $7.49$  (t,  $J = 8.0$  Hz, 1H),  $3.91$  (s, 3H),  $3.01$  (q,  $J = 7.3$  Hz, 2H),  $1.40$  (t,  $J = 7.1$  Hz, 3H).  $^{13}\text{C NMR}$  (100 MHz,  $\text{CDCl}_3$ ):  $\delta_{\text{C}} = 170.20, 168.02, 148.98, 139.52, 127.98, 126.54, 118.75, 115.22, 52.67, 22.29, 11.19$ . MS (ESI)  $m/z$ :  $[\text{M}+\text{H}]^+$  206.1. HRMS-ESI ( $m/z$ ): calcd for  $\text{C}_{11}\text{H}_{12}\text{NO}_3$   $[\text{M}+\text{H}]^+$ : 206.0811; found: 206.0813.

### Ethyl 2-hydroxy-5-propionamidobenzoate (3x)

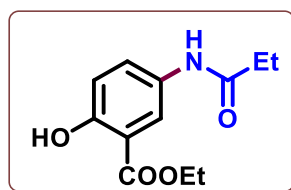

**Unknown compound.** Yield: 34%, 0.097 g. Brown solid, mp 97-100 °C.  $^1\text{H NMR}$  (400 MHz,  $\text{CDCl}_3$ ):  $\delta_{\text{H}} = 10.70$  (s, 1H),  $8.04$  (d,  $J = 2.7$  Hz, 1H),  $7.54$  (dd,  $J = 8.9, 2.7$  Hz, 1H),  $7.19$  (s, 1H),  $6.95$  (d,  $J = 8.9$  Hz, 1H),  $4.42$  (q,  $J = 7.3$  Hz, 2H),  $2.40$  (q,  $J = 7.3$  Hz, 2H),  $1.43$  (t,  $J = 7.2$  Hz, 3H),  $1.27$  (t,  $J = 7.2$  Hz, 3H).  $^{13}\text{C NMR}$  (100 MHz,  $\text{CDCl}_3$ ):  $\delta_{\text{C}} = 172.06, 169.85, 158.51, 129.51, 128.63, 121.51, 117.90, 112.36, 61.61, 30.44, 29.69, 14.19, 9.63$ . MS (ESI)  $m/z$ :  $[\text{M}+\text{H}]^+$  238.1. HRMS-ESI ( $m/z$ ): calcd for  $\text{C}_{12}\text{H}_{16}\text{NO}_4$   $[\text{M}+\text{H}]^+$ : 238.1074; found: 238.1073.

### Ethyl 2-ethylbenzo[d]oxazole-7-carboxylate (3xx)

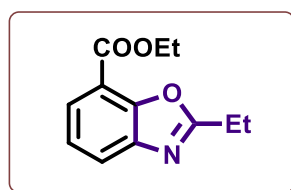

**Unknown compound.** Yield: 33%, 0.087 g. Brown oil.  $^1\text{H NMR}$  (400 MHz,  $\text{CDCl}_3$ ):  $\delta_{\text{H}} = 7.97$  (dd,  $J = 7.8, 1.2$  Hz, 1H),  $7.88$  (dd,  $J = 7.9, 1.2$  Hz, 1H),  $7.40$  (t,  $J = 8.1$  Hz, 1H),  $4.48$  (q,  $J = 7.2$  Hz, 2H),  $3.06$  (q,  $J = 7.2$  Hz, 2H),  $1.40$  (t,  $J = 7.1$  Hz, 3H),  $1.33$  (t,  $J = 7.1$  Hz, 3H).  $^{13}\text{C NMR}$  (100 MHz,  $\text{CDCl}_3$ ):  $\delta_{\text{C}} = 172.06, 169.85, 158.52, 129.51, 128.63, 121.51, 117.90, 112.36, 61.61, 30.44, 14.19, 9.63$ . MS (ESI)  $m/z$ :  $[\text{M}+\text{H}]^+$  220.1. HRMS-ESI ( $m/z$ ): calcd for  $\text{C}_{12}\text{H}_{14}\text{NO}_3$   $[\text{M}+\text{H}]^+$ : 220.0968; found: 220.0971.

### *N*-(2,5-bis(trifluoromethyl)phenyl)butyramide (4a)

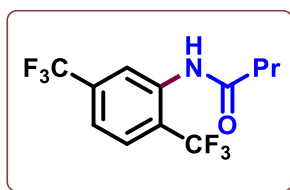

**Unknown compound.** Yield: 82%, 0.294 g. White solid.  $^1\text{H}$  NMR (400 MHz,  $\text{CDCl}_3$ ):  $\delta_{\text{H}} = 8.54$  (s, 1H), 7.80 (d,  $J = 9.1$  Hz, 1H), 7.50 (d,  $J = 8.9$  Hz, 2H), 2.47 (t,  $J = 7.5$  Hz, 2H), 1.77 (h,  $J = 7.5$  Hz, 2H), 0.97 (t,  $J = 7.5$  Hz, 3H).  $^{13}\text{C}$  NMR (100 MHz,  $\text{CDCl}_3$ ):  $\delta_{\text{C}} = 171.77, 138.45, 136.89, 136.82, 136.75, 134.97, 134.65, 134.33, 134.01, 130.87, 128.13, 127.35, 125.40, 122.69, 121.18, 39.08, 20.76, 14.17$ .  $^{19}\text{F}$  NMR (376 MHz,  $\text{CDCl}_3$ ):  $\delta_{\text{F}} = -61.17, -63.11$ . MS (ESI)  $m/z$ :  $[\text{M}+\text{H}]^+$  300.1. HRMS-ESI ( $m/z$ ): calcd for  $\text{C}_{12}\text{H}_{12}\text{F}_6\text{NO}$   $[\text{M}+\text{H}]^+$ : 300.0817; found: 300.0818.

#### ***N*-(2,6-bis(trifluoromethyl)phenyl)butyramide (4b)**

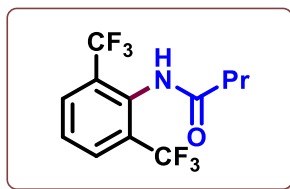

**Unknown compound.** Yield: 74%, 0.253 g. Brown solid.  $^1\text{H}$  NMR (400 MHz,  $\text{CDCl}_3$ ):  $\delta_{\text{H}} = 8.83$  (s, 1H), 8.03 (d,  $J = 8.5$  Hz, 2H), 7.70 (t,  $J = 8.4$  Hz, 1H), 2.44 (t,  $J = 7.4$  Hz, 2H), 1.75 (h,  $J = 7.5$  Hz, 2H), 0.98 (t,  $J = 7.5$  Hz, 3H).  $^{13}\text{C}$  NMR (100 MHz,  $\text{CDCl}_3$ ):  $\delta_{\text{C}} = 172.60, 140.47, 140.43, 140.40, 133.12, 132.79, 132.47, 132.41, 132.08, 130.07, 130.04, 130.00, 129.97, 129.93, 129.09, 129.06, 129.02, 128.98, 128.95, 127.94, 125.19, 122.46, 119.72, 38.18, 19.94, 14.06$ .  $^{19}\text{F}$  NMR (376 MHz,  $\text{CDCl}_3$ ):  $\delta_{\text{F}} = -61.28$ . MS (ESI)  $m/z$ :  $[\text{M}+\text{H}]^+$  300.1. HRMS (ESI)  $m/z$   $[\text{M}+\text{H}]^+$ : calcd for  $\text{C}_{12}\text{H}_{12}\text{F}_6\text{NO}$ , 300.0817; found, 300.0818.

#### ***N*-(2-chloro-5-(trifluoromethyl)phenyl)butyramide (4e)**

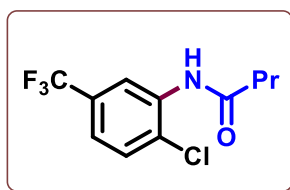

**Unknown compound.** 85%, 0.271 g. Brown solid.  $^1\text{H}$  NMR (400 MHz,  $\text{CDCl}_3$ ):  $\delta_{\text{H}} = 8.57$  (s, 1H), 8.18 (s, 1H), 7.52 (d,  $J = 8.5$  Hz, 1H), 7.33 (d,  $J = 8.2$  Hz, 1H), 2.46 (t,  $J = 7.5$  Hz, 2H), 1.73 (h,  $J = 7.5$  Hz, 2H), 1.00 (t,  $J = 7.5$  Hz, 3H).  $^{13}\text{C}$  NMR (125 MHz,  $\text{CDCl}_3$ ):  $\delta_{\text{C}} = 172.41, 134.35, 130.31, 130.04, 129.78, 129.52, 129.19, 126.16, 125.16, 124.03, 122.05, 119.99, 118.29, 39.31, 20.20, 14.40$ .  $^{19}\text{F}$  NMR (376 MHz,  $\text{CDCl}_3$ )  $\delta = -62.65$ . MS (ESI)  $m/z$ :  $[\text{M}+\text{H}]^+$  266.1. HRMS-ESI ( $m/z$ ): calcd for  $\text{C}_{11}\text{H}_{12}\text{ClF}_3\text{NO}$   $[\text{M}+\text{H}]^+$ : 266.0554; found: 266.0554.

#### ***N*-(4-fluorophenyl)butyramide (4f)**

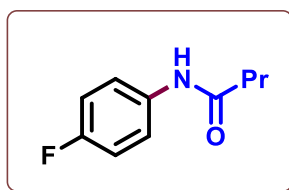

**Known compound.**<sup>49</sup> Yield: 67%, 0.146 g. Brown solid. <sup>1</sup>H NMR (400 MHz, CDCl<sub>3</sub>): δ<sub>H</sub> = 7.48 (dd, *J* = 8.8 Hz, 3.5 Hz, 2H), 7.14 (s, 1H), 7.05 – 7.00 (m, 2H), 2.34 (t, *J* = 7.6 Hz, 2H), 1.72 (h, *J* = 7.5 Hz, 2H), 1.00 (t, *J* = 7.6 Hz, 3H). <sup>13</sup>C NMR (100 MHz, CDCl<sub>3</sub>): δ<sub>C</sub> = 171.67, 160.39, 157.92, 134.36, 134.34, 121.73, 115.70, 115.48, 38.81, 21.14, 13.80. <sup>19</sup>F NMR (376 MHz, CDCl<sub>3</sub>): δ<sub>F</sub> = -118.05. MS (ESI) *m/z*: [M+H]<sup>+</sup> 182.1. HRMS-ESI (*m/z*): calcd for C<sub>10</sub>H<sub>13</sub>FNO [M+H]<sup>+</sup>: 182.0976, found 182.0977.

#### ***N*-(5-chloro-2-hydroxyphenyl)butyramide (4i)**

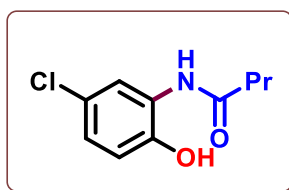

**Known compound.**<sup>50</sup> Yield: 23%, 0.059 g. White solid. <sup>1</sup>H NMR (400 MHz, DMSO-*d*<sub>6</sub>): δ<sub>H</sub> = 10.04 (s, 1H), 9.12 (s, 1H), 8.01 (d, *J* = 1.9 Hz, 1H), 6.98 (dd, *J* = 6.4, 1.8 Hz, 1H), 6.89 (d, *J* = 6.4 Hz, 1H), 2.39 (t, *J* = 5.5 Hz, 2H), 1.63 (h, *J* = 5.5 Hz, 2H), 0.96 (t, *J* = 5.6 Hz, 3H). <sup>13</sup>C NMR (100 MHz, DMSO-*d*<sub>6</sub>): δ<sub>C</sub> = 172.99, 147.30, 128.84, 124.45, 123.21, 122.06, 117.35, 38.92, 19.69, 14.49. MS (ESI) *m/z*: [M+H]<sup>+</sup> 214.1. HRMS-ESI (*m/z*): calcd for C<sub>10</sub>H<sub>13</sub>ClNO<sub>2</sub> [M+H]<sup>+</sup>: 214.0629; found: 214.0628.

#### **5-chloro-2-propylbenzo[d]oxazole (4ii)**

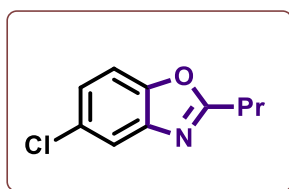

**Unknown compound.** Yield: 50%, 0.117 g. White solid, mp 41-44 °C. <sup>1</sup>H NMR (400 MHz, CDCl<sub>3</sub>): δ<sub>H</sub> = 7.70 (d, *J* = 1.6 Hz, 1H), 7.47 (d, *J* = 6.5 Hz, 1H), 7.33 (dd, *J* = 6.4, 1.6 Hz, 1H), 2.95 (t, *J* = 5.5 Hz, 2H), 1.94 (h, *J* = 5.6 Hz, 2H), 1.02 (t, *J* = 5.6 Hz, 3H). <sup>13</sup>C NMR (125 MHz, CDCl<sub>3</sub>): δ<sub>C</sub> = 169.58, 149.87, 142.26, 130.22, 124.98, 119.33, 110.77, 30.68, 20.25, 13.64. MS (ESI) *m/z*: [M+H]<sup>+</sup> 196.1. HRMS-ESI (*m/z*): calcd for C<sub>10</sub>H<sub>11</sub>ONCl [M+H]<sup>+</sup>: 196.0524; found: 196.0524.

#### ***N*-(5-bromo-2-hydroxyphenyl)butyramide (4j)**

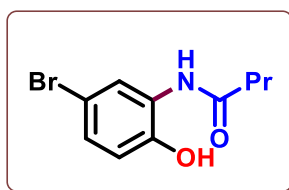

**Unknown compound.** 11%, 0.034 g. Brown solid.  $^1\text{H}$  NMR (400 MHz,  $\text{CDCl}_3$ ):  $\delta_{\text{H}}$  = 8.78 (s, 1H), 8.40 (s, 1H), 7.92 (d,  $J$  = 2.5 Hz, 1H), 7.18 (dd,  $J$  = 8.6, 2.3 Hz, 1H), 6.89 (d,  $J$  = 8.4 Hz, 1H), 2.44 (t,  $J$  = 7.4 Hz, 2H), 1.68 (h,  $J$  = 7.4 Hz, 2H), 0.97 (t,  $J$  = 7.5 Hz, 3H).  $^{13}\text{C}$  NMR (100 MHz,  $\text{CDCl}_3$ ):  $\delta_{\text{C}}$  = 172.38, 147.71, 129.78, 126.95, 123.58, 117.93, 113.13, 38.84, 20.39, 14.24. MS (ESI)  $m/z$ :  $[\text{M}+\text{H}]^+$  258.0. HRMS-ESI ( $m/z$ ): calcd for  $\text{C}_{10}\text{H}_{13}\text{BrNO}_2$   $[\text{M}+\text{H}]^+$ : 258.0124; found: 258.0124.

#### 5-bromo-2-propylbenzo[d]oxazole (4jj)

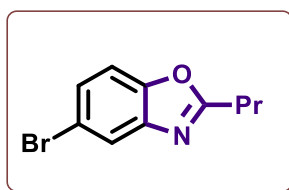

**Unknown compound.** Yield: 63%, 0.182 g. White solid, mp 51-53 °C.  $^1\text{H}$  NMR (400 MHz,  $\text{CDCl}_3$ ):  $\delta_{\text{H}}$  = 7.81 (d,  $J$  = 1.6 Hz, 1H), 7.49 (dd,  $J$  = 6.4, 1.5 Hz, 1H), 7.39 (d,  $J$  = 6.4 Hz, 1H), 2.93 (t,  $J$  = 5.6 Hz, 2H), 1.97 (h,  $J$  = 5.6 Hz, 2H), 1.08 (t,  $J$  = 5.6 Hz, 3H).  $^{13}\text{C}$  NMR (125 MHz,  $\text{CDCl}_3$ ):  $\delta_{\text{C}}$  = 169.12, 149.96, 143.10, 128.15, 121.89, 117.32, 111.65, 30.65, 22.11, 13.53. MS (ESI)  $m/z$ :  $[\text{M}+\text{H}]^+$  240.0. HRMS-ESI ( $m/z$ ): calcd for  $\text{C}_{10}\text{H}_{11}\text{BrNO}$   $[\text{M}+\text{H}]^+$ : 240.0019; found: 240.0018.

#### *N*-phenylbutyramide (4k)

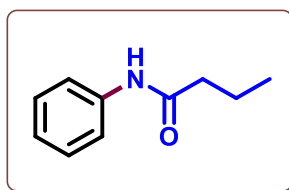

**Known compound.**<sup>51</sup> Yield: 68%, 0.133 g. Brown solid, mp 99-103 °C.  $^1\text{H}$  NMR (400 MHz,  $\text{CDCl}_3$ ):  $\delta_{\text{H}}$  = 7.67 (d,  $J$  = 7.9 Hz, 2H), 7.60 (s, 1H), 7.33 (t,  $J$  = 7.9 Hz, 2H), 7.12 (t,  $J$  = 7.4 Hz, 1H), 2.25 (t,  $J$  = 5.6 Hz, 2H), 1.66 (h,  $J$  = 5.6 Hz, 2H), 0.97 (t,  $J$  = 5.6 Hz, 3H).  $^{13}\text{C}$  NMR (100 MHz,  $\text{CDCl}_3$ ):  $\delta_{\text{C}}$  = 171.40, 138.09, 129.09, 124.18, 119.88, 39.72, 20.20, 13.72. MS (ESI)  $m/z$ :  $[\text{M}+\text{H}]^+$  164.1. HRMS-ESI ( $m/z$ ): calcd for  $\text{C}_{10}\text{H}_{14}\text{NO}$   $[\text{M}+\text{H}]^+$ : 164.1070; found: 164.1072.

#### *N*-(2-chloro-5-nitrophenyl)butyramide (4o)

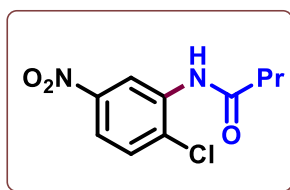

**Unknown compound.** Yield: 82%, 0.239 g. Yellow solid, mp 126.5 °C.  $^1\text{H}$  NMR (500 MHz,  $\text{CDCl}_3$ ):  $\delta_{\text{H}}$  = 9.37 (d,  $J$  = 2.59 Hz, 1H), 7.92 (dd,  $J$  = 8.75 Hz, 1H), 7.74 (s, 1H), 7.56 (d,  $J$  = 8.74 Hz, 1H), 2.49 (t,  $J$  = 5.6 Hz, 2H), 1.83 (h,  $J$  = 5.6 Hz, 2H), 1.07 (t,  $J$  = 5.6 Hz, 3H).  $^{13}\text{C}$  NMR (125 MHz,  $\text{CDCl}_3$ ):  $\delta_{\text{C}}$  = 171.35, 147.21, 135.52, 129.44, 128.37, 118.84, 116.29, 116.27, 39.74, 18.76, 13.65. MS (ESI)  $m/z$ :  $[\text{M}+\text{H}]^+$  243.0. HRMS-ESI ( $m/z$ ): calcd for  $\text{C}_{10}\text{H}_{12}\text{ClN}_2\text{O}_3$   $[\text{M}+\text{H}]^+$ : 243.0531; found: 243.0531.

#### ***N*-(2-fluoro-5-nitrophenyl)butyramide (4p)**

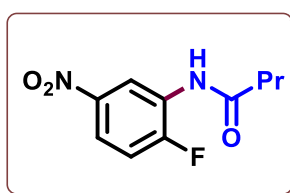

**Unknown compound.** Yield: 70%, 0.190 g. Yellow solid, mp 103.6 °C.  $^1\text{H}$  NMR (400 MHz,  $\text{CDCl}_3$ ):  $\delta_{\text{H}}$  = 9.31 (dd,  $J$  = 6.9, 2.8 Hz, 1H), 7.97 (ddd,  $J$  = 9.0, 4.4, 2.9 Hz, 1H), 7.65 (s, 1H), 7.28 – 7.19 (m, 1H), 2.46 (t,  $J$  = 7.4 Hz, 2H), 1.79 (h,  $J$  = 7.4 Hz, 2H), 1.03 (t,  $J$  = 7.4 Hz, 4H).  $^{13}\text{C}$  NMR (100 MHz,  $\text{CDCl}_3$ ):  $\delta_{\text{C}}$  = 171.64, 171.23, 156.35, 154.33, 144.51, 127.38, 127.28, 119.68, 119.61, 117.42, 115.38, 115.20, 39.26, 17.83, 13.57.  $^{19}\text{F}$  NMR (376 MHz,  $\text{CDCl}_3$ ):  $\delta_{\text{F}}$  = -119.93. MS (ESI)  $m/z$ :  $[\text{M}+\text{H}]^+$  227.1. HRMS-ESI ( $m/z$ ): calcd for  $\text{C}_{10}\text{H}_{12}\text{FN}_2\text{O}_3$   $[\text{M}+\text{H}]^+$ : 227.0827; found: 227.0829.

#### ***N*-(4-hydroxy-3,5-dimethylphenyl)butyramide (4u)**

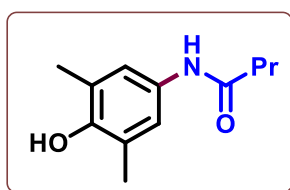

**Known compound.**<sup>48</sup> Yield: 64%, 0.159 g. White solid, mp 138-140 °C.  $^1\text{H}$  NMR (400 MHz,  $\text{DMSO-d}_6$ ):  $\delta_{\text{H}}$  =  $\delta$  8.75 (s, 1H), 8.09 (s, 1H), 7.12 (s, 2H), 2.22 (t,  $J$  = 7.6 Hz, 2H), 2.15 (s, 6H), 1.59 (h,  $J$  = 7.6 Hz, 2H), 0.92 (t,  $J$  = 7.6 Hz, 3H).  $^{13}\text{C}$  NMR (100 MHz,  $\text{DMSO-d}_6$ ):  $\delta_{\text{C}}$  = 170.29, 149.61, 131.82, 124.83, 119.90, 38.42, 19.11, 17.14, 13.72. MS (ESI)  $m/z$ :  $[\text{M}+\text{H}]^+$  208.1. HRMS-ESI ( $m/z$ ): calcd for  $\text{C}_{12}\text{H}_{18}\text{NO}_2$   $[\text{M}+\text{H}]^+$ : 208.1332; found: 208.1331.

#### **Methyl 5-butyramido-2-hydroxybenzoate (4w)**



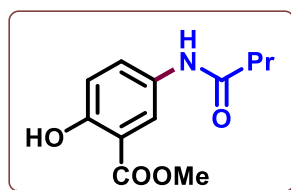

**Unknown compound.** Yield: 34%, 0.097 g. Brown solid, mp 127-130 °C.  $^1\text{H}$  NMR (400 MHz, DMSO- $d_6$ ):  $\delta_{\text{H}} = 9.10$  (s, 1H), 8.37 (s, 1H), 8.05 (d,  $J = 1.4$  Hz, 1H), 7.56 (dd,  $J = 6.5, 1.4$  Hz, 1H), 6.98 (d,  $J = 6.4$  Hz, 1H), 3.92 (s, 3H), 2.41 (t,  $J = 5.6$  Hz, 2H), 1.66 (h,  $J = 5.6$  Hz, 2H), 1.03 (t,  $J = 5.6$  Hz, 3H).  $^{13}\text{C}$  NMR (100 MHz, DMSO- $d_6$ ):  $\delta_{\text{C}} = 171.94, 170.60, 158.82, 128.18, 116.61, 113.50, 53.09, 39.27, 20.42, 13.72$ . MS (ESI)  $m/z$ :  $[\text{M}+\text{H}]^+$  238.1. HRMS-ESI ( $m/z$ ): calcd for  $\text{C}_{12}\text{H}_{16}\text{NO}_4$   $[\text{M}+\text{H}]^+$ : 238.1074; found: 238.1074.

#### Methyl 2-propylbenzo[d]oxazole-7-carboxylate (4ww)

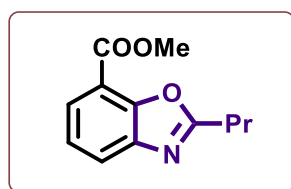

**Unknown compound.** Yield: 33%, 0.087 g. Brown oil.  $^1\text{H}$  NMR (400 MHz,  $\text{CDCl}_3$ ):  $\delta_{\text{H}} = 7.98$  (dd,  $J = 8.8, 1.8$  Hz, 1H), 7.72 (dd,  $J = 8.4, 1.8$  Hz, 1H), 7.50 (t,  $J = 8.6$  Hz, 1H), 3.98 (s, 3H), 2.95 (t,  $J = 7.4$  Hz, 2H), 1.99 (h,  $J = 7.5$  Hz, 2H), 0.99 (t,  $J = 7.5$  Hz, 3H).  $^{13}\text{C}$  NMR (100 MHz,  $\text{CDCl}_3$ ):  $\delta_{\text{C}} = 171.59, 169.50, 151.05, 139.74, 127.13, 126.13, 119.84, 115.76, 52.33, 30.32, 20.21, 13.35$ . MS (ESI)  $m/z$ :  $[\text{M}+\text{H}]^+$  220.1. HRMS-ESI ( $m/z$ ): calcd for  $\text{C}_{12}\text{H}_{14}\text{NO}_3$   $[\text{M}+\text{H}]^+$ : 220.0968; found: 220.0968.

#### Ethyl 5-butylamido-2-hydroxybenzoate (4x)

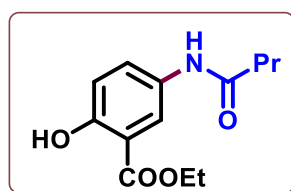

**Unknown compound.** Yield: 31%, 0.093 g. Orange solid, mp 105-108 °C.  $^1\text{H}$  NMR (400 MHz,  $\text{CD}_3\text{CN}$ ):  $\delta_{\text{H}} = 10.18$  (s, 1H), 8.51 (s, 1H), 8.08 (d,  $J = 1.7$  Hz, 1H), 7.63 (dd,  $J = 6.3, 1.6$  Hz, 1H), 6.95 (d,  $J = 6.4$  Hz, 1H), 4.36 (q,  $J = 5.5$  Hz, 2H), 2.47 (t,  $J = 5.7$  Hz, 2H), 1.66 (h,  $J = 5.7$  Hz, 2H), 1.43 (t,  $J = 5.5$  Hz, 3H), 0.97 (t,  $J = 5.6$  Hz, 3H).  $^{13}\text{C}$  NMR (100 MHz,  $\text{CDCl}_3$ ):  $\delta_{\text{C}} = 171.69, 170.49, 159.17, 130.33, 128.81, 121.31, 115.43, 114.28, 62.12, 39.84, 20.17, 14.12$ . MS (ESI)  $m/z$ :  $[\text{M}+\text{H}]^+$  252.12. HRMS-ESI ( $m/z$ ): calcd for  $\text{C}_{13}\text{H}_{18}\text{NO}_4$   $[\text{M}+\text{H}]^+$ : 252.1230; found: 252.1231.

#### Ethyl 2-propylbenzo[d]oxazole-7-carboxylate (4xx)

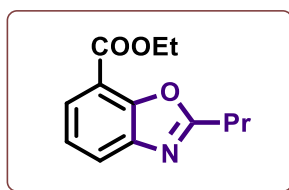

**Unknown compound.** Yield: 35%, 0.098 g. Brown oil.  $^1\text{H NMR}$  (400 MHz,  $\text{CDCl}_3$ ):  $\delta_{\text{H}} = 8.04$  (dd,  $J = 12.9, 3.0$  Hz, 1H),  $7.69$  (dd,  $J = 12.9, 2.9$  Hz, 1H),  $7.50$  (t,  $J = 13.0$  Hz, 1H),  $4.45$  (q,  $J = 10.8$  Hz, 2H),  $2.96$  (t,  $J = 11.4$  Hz, 2H),  $2.07$  (h,  $J = 11.5$  Hz, 2H),  $1.41$  (t,  $J = 10.8$  Hz, 3H),  $0.96$  (t,  $J = 11.4$  Hz, 3H).  $^{13}\text{C NMR}$  (100 MHz,  $\text{CDCl}_3$ ):  $\delta_{\text{C}} = 170.84, 169.54, 157.80, 130.52, 128.95, 123.08, 118.31, 113.33, 61.96, 30.03, 20.07, 14.19, 13.59$ . MS (ESI)  $m/z$ :  $[\text{M}+\text{H}]^+$  234.11. HRMS-ESI ( $m/z$ ): calcd for  $\text{C}_{13}\text{H}_{16}\text{NO}_3$   $[\text{M}+\text{H}]^+$ : 234.1125; found: 234.1124.

### 2,5-bis(trifluoromethyl)aniline (5a)

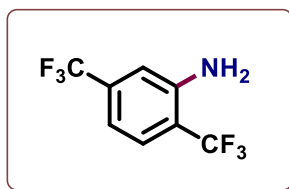

Yield: 78%.  $^1\text{H NMR}$  (400 MHz,  $\text{CDCl}_3$ ):  $\delta_{\text{H}} = 7.55$  (d,  $J = 7.6$  Hz, 1H),  $7.02$  (d,  $J = 7.8$  Hz, 2H),  $4.38$  (s, 2H).

### 2-chloro-5-(trifluoromethyl)aniline (5e)

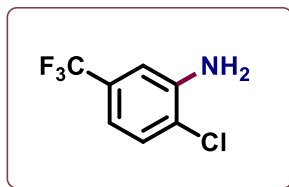

Yield: 80%.  $^1\text{H NMR}$  (400 MHz,  $\text{CDCl}_3$ ):  $\delta_{\text{H}} = 7.53$  (q,  $J = 4.5$  Hz, 1H),  $7.21$  (d,  $J = 7.9$  Hz, 2H),  $5.72$  (s, 2H).

### 4-fluoroaniline (5f)

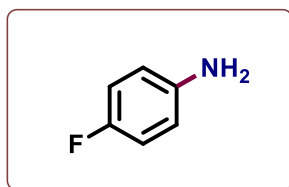

Yield: 64%.  $^1\text{H NMR}$  (400 MHz,  $\text{CDCl}_3$ ):  $\delta_{\text{H}} = 6.90 - 6.85$  (m, 1H),  $6.65 - 6.62$  (m, 1H),  $3.55$  (s, 1H).

### 4-chloroaniline (5g)

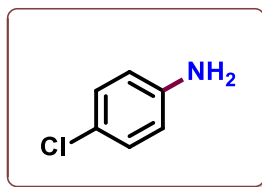

Yield: 38%.  $^1\text{H}$  NMR (400 MHz,  $\text{CDCl}_3$ ):  $\delta_{\text{H}} = 6.95 - 6.87$  (m, 1H),  $6.67 - 6.63$  (m, 1H),  $3.65$  (s, 1H).

#### aniline (5k)

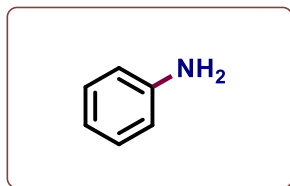

Yield: 65%.  $^1\text{H}$  NMR (400 MHz,  $\text{CDCl}_3$ ):  $\delta_{\text{H}} = 7.22 - 7.17$  (m, 1H),  $6.80$  (tt,  $J = 7.5, 1.0$  Hz, 1H),  $6.74 - 6.70$  (m, 1H),  $3.66$  (s, 1H).

#### 2-nitroaniline (5m)

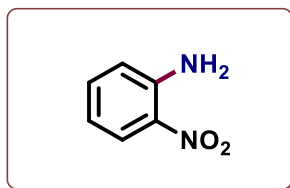

Yield: 31%.  $^1\text{H}$  NMR (400 MHz,  $\text{CDCl}_3$ ):  $\delta_{\text{H}} = 8.14$  (dd,  $J = 8.6, 1.4$  Hz, 1H),  $7.40 - 7.35$  (m, 1H),  $6.82$  (dd,  $J = 8.4, 1.2$  Hz, 1H),  $6.73$  (ddd,  $J = 8.5, 7.0, 1.3$  Hz, 1H),  $6.05$  (s, 2H).

#### 2-chloro-5-nitroaniline (5o)

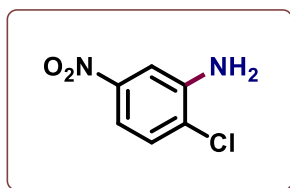

Yield: 63%.  $^1\text{H}$  NMR (400 MHz,  $\text{CDCl}_3$ ):  $\delta_{\text{H}} = 7.63$  (d,  $J = 2.6$  Hz, 1H),  $7.55$  (dd,  $J = 8.7, 2.6$  Hz, 1H),  $7.40$  (d,  $J = 8.7$  Hz, 1H),  $4.39$  (s, 2H).

#### 2-fluoro-5-nitroaniline (5p)

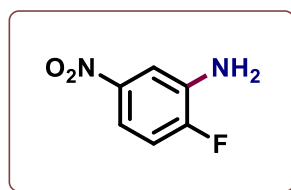

<sup>1</sup>H NMR (400 MHz, CDCl<sub>3</sub>): δ<sub>H</sub> = 7.70-7.67 (m, 1H), 7.45 (t, *J* = 7.7 Hz, 1H), 7.30 (d, *J* = 7.7 Hz, 1H), 4.38 (s, 2H).

### 2-bromo-5-nitroaniline (5q)

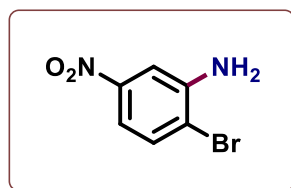

<sup>1</sup>H NMR (400 MHz, CDCl<sub>3</sub>): δ<sub>H</sub> = 7.80 (dd, *J* = 8.7, 2.6 Hz, 1H), 7.69 (d, *J* = 8.7 Hz, 1H), 7.63 (d, *J* = 8.4 Hz, 1H), 4.56 (s, 2H).

## 8. References

1. Giancotti, G.; Nannetti, G.; Padalino, G.; Landini, M.; Santos-Ferreira, N.; Van Dycke, J.; Naccarato, V.; Patel, U.; Silvestri, R.; Neyts, J.; Gozalbo-Rovira, R.; Rodríguez-Díaz, J.; Rocha-Pereira, J.; Brancale, A.; Ferla, S.; Bassetto, M. Structural investigations on novel non-nucleoside inhibitors of human norovirus polymerase. *Viruses* **2022**, *15*(1), 74.
2. Weinberg, N. L.; Weinberg, H. R. Electrochemical oxidation of organic compounds. *Chem. Rev.* **1968**, *68*, 449-523.
3. Kadish, K. M.; Anderson, J. E. Purification of solvents for electroanalysis: benzonitrile; dichloromethane; 1,1-dichloroethane and 1,2-dichloroethane. *Pure Appl. Chem.* **1987**, *59*, 703-714.
4. Pracht, P.; Bohle, F.; Grimme, S. Automated Exploration of the Low-Energy Chemical Space with Fast Quantum Chemical Methods. *Phys. Chem. Chem. Phys.* **2020**, *22*(14), 7169-7192.
5. Bannwarth, C.; Ehlert, S.; Grimme, S. GFN2-XTB—An Accurate and Broadly Parametrized Self-Consistent Tight-Binding Quantum Chemical Method with Multipole Electrostatics and Density-Dependent Dispersion Contributions. *J. Chem. Theory Comput.* **2019**, *15*(3), 1652-1671.
6. Ehlert, S.; Stahn, M.; Spicher, S.; Grimme, S. Robust and Efficient Implicit Solvation Model for Fast Semiempirical Methods. *J. Chem. Theory Comput.* **2021**, *17*(7), 4250-4261.
7. Medvedev, M. G.; Panova, M. V.; Chilov, G. G.; Bushmarinov, I. S.; Novikov, F. N.; Stroganov, O. V.; Zeifman, A. A.; Svitanko, I. V. Exhaustive Conformational Search for Transition States: The Case of Catechol O-Methyltransferase Active Site. *Mendeleev Commun.* **2017**, *27*, 224-227.
8. Becke, A. D. Density-functional Thermochemistry. III. The Role of Exact Exchange. *J.*

- Chem. Phys.* **1993**, 98(7), 5648-5652.
9. Stephens, P. J.; Devlin, F. J.; Chabalowski, C. F.; Frisch, M. J. Ab Initio Calculation of Vibrational Absorption and Circular Dichroism Spectra Using Density Functional Force Fields. *J. Phys. Chem.* **1994**, 98(45), 11623-11627.
  10. Grimme, S.; Antony, J.; Ehrlich, S.; Krieg, H. A Consistent and Accurate *Ab Initio* Parametrization of Density Functional Dispersion Correction (DFT-D) for the 94 Elements H-Pu. *J. Chem. Phys.* **2010**, 132(15), 154104.
  11. Grimme, S.; Ehrlich, S.; Goerigk, L. Effect of the Damping Function in Dispersion Corrected Density Functional Theory. *J. Comput. Chem.* **2011**, 32(7), 1456-1465.
  12. Barone, V.; Cossi, M. Quantum Calculation of Molecular Energies and Energy Gradients in Solution by a Conductor Solvent Model. *J. Phys. Chem. A* **1998**, 102(11), 1995-2001.
  13. Riplinger, C.; Neese, F. An Efficient and near Linear Scaling Pair Natural Orbital Based Local Coupled Cluster Method. *J. Chem. Phys.* **2013**, 138(3), 034106.
  14. Weigend, F.; Ahlrichs, R. Balanced Basis Sets of Split Valence, Triple Zeta Valence and Quadruple Zeta Valence Quality for H to Rn: Design and Assessment of Accuracy. *Phys. Chem. Chem. Phys.* **2005**, 7(18), 3297.
  15. Malloum, A.; Conradie, J. Solvation Free Energy of the Proton in Acetonitrile. *J. Mol. Liq.* **2021**, 335, 116032.
  16. Bruker. APEX3 Crystallography Software Suite, Bruker AXS, Inc., Madison, WI, USA. 2016.
  17. Bruker. SAINT. Crystallography Software Suite, Bruker AXS, Inc., Madison, WI, USA. 2016.
  18. Sheldrick, G. M. A Short History of SHELX. *Acta Crystallogr. A: Found. Crystallogr.* **2008**, 64(1), 112-122.
  19. Krause, L.; Herbst-Irmer, R.; Sheldrick, G.M.; Stalke, D. Comparison of Silver and Molybdenum Microfocus X-Ray Sources for Single-Crystal Structure Determination. *J. Appl. Crystallogr.* **2015**, 48(1), 3-10.
  20. Sevvana, M.; Ruf, M.; Usón, I.; Sheldrick, G.M.; Herbst-Irmer, R. Non-merohedral twinning: from minerals to proteins. *Acta Crystallogr. D: Struct. Biol.* **2019**, 75(12), 1040-1050.
  21. Strelakova, S.; Kononov, A.; Morozov, V.; Babaeva, O.; Gavrilova, E.; Budnikova Y. Electrochemical Approach to Amide Bond Formation. *Adv. Synth. Catal.* **2023**, 365, 3375-3381.
  22. Zhang, H.R.; Feng, C.C.; Chen, N.; Zhang, S.L. Direct Arene Trifluoromethylation Enabled by a High-Valent CuIII-CF<sub>3</sub> Compound. *Angew. Chem. Int.Ed.* **2022**, 61, e202209029.
  23. Bao, Z.P.; Miao, R.G.; Qi, X.; Wu, X.F. A novel construction of acetamides from rhodium-catalyzed aminocarbonylation of DMC with nitro compounds. *Chem. Commun.* **2021**, 57, 1955-1958.
  24. Liu, W.; Li, J.; Querard, P.; Li, C.J. Transition-metal-free C-C, C-O, and C-N cross-couplings enabled by light. *J. Am. Chem. Soc.* **2019**, 141(16), 6755-6764.
  25. Gowda, S.; Gowda, B.T. <sup>1</sup>H and <sup>13</sup>C NMR Spectral Studies on N-(j, k-Dichlorophenyl)- and N-(j,k-Dimethylphenyl)-acetamides and Substituted Acetamides. *Zeitschrift für Naturforschung A.* **2007**, 62(1-2), 84-90.

26. Mayo, M.S.; Yu, X.; Zhou, X.; Feng, X.; Yamamoto, Y.; Bao, M. Synthesis of benzoxazoles from 2-aminophenols and  $\beta$ -diketones using a combined catalyst of Brønsted acid and copper iodide. *J. Org. Chem.* **2014**, *79*(13), 6310-6314.
27. Dabiri, M.; Alavioon, S.I.; Movahed, S.K. Palladium Supported on Mesoporous Silica/Graphene Nanohybrid as a Highly Efficient and Reusable Heterogeneous Catalyst for C–H Functionalization. *ChemistrySelect* **2018**, *3*(12), 3487-3494.
28. Peng, S.; Yang, L. Copper-Catalyzed Cyanation of Aryl Iodides with Formamide as the Cyano Source. *Asian J. Org. Chem.* **2022**, *11*(11), e202200437.
29. Gao, Y.; Mao, Y.; Zhang, B.; Zhan, Y.; Huo, Y. Regioselective nitration of anilines with Fe(NO<sub>3</sub>)<sub>3</sub>·9H<sub>2</sub>O as a promoter and a nitro source. *Org. Biomol. Chem.* **2018**, *16*(21), 3881-3884.
30. Sonawane, R.B.; Rasal, N.K.; Jagtap, S.V. Nickel-(II)-catalyzed N-formylation and N-acylation of amines. *Org. Lett.* **2017**, *19*(8), 2078-2081.
31. Darvesh, S.; McDonald, R.S.; Darvesh, K.V.; Mataija, D.; Mothana, S.; Cook, H.; Carneiro, K.M.; Richard, N.; Walsh, R.; Martin, E. On the active site for hydrolysis of aryl amides and choline esters by human cholinesterases. *Bioorg. Med. Chem.* **2006**, *14*(13), 4586-4599.
32. Augustine, J.K.; Kumar, R.; Bombrun, A.; Mandal, A.B. An efficient catalytic method for the Beckmann rearrangement of ketoximes to amides and aldoximes to nitriles mediated by propylphosphonic anhydride (T3P®). *Tetrahedron Lett.* **2011**, *52*(10), 1074-1077.
33. Sriramoju, V.; Kurva, S.; Madabhushi, S. New method for the preparation of N-chloroamines by oxidative N-halogenation of amines using oxone-KCl. *Synth. Commun.* **2018**, *48*(6), 699-704.
34. Dai, E.; Dong, Y.; Kong, R.; Liu, G.; Dong, Y.; Wu, Q.; Liang, D.; Ma, Y. Transition-metal-free mono-or dinitration of protected anilines. *Synth. Commun.* **2020**, *50*(11), 1687-1695.
35. Chung, C. Y. S.; Shin, H. R.; Berdan, C. A.; Ford, B.; Ward, C. C.; Olzmann, J. A.; Zoncu, R.; Nomura, D. K. Covalent targeting of the vacuolar H<sup>+</sup>-ATPase activates autophagy via mTORC1 inhibition. *Nature Chem. Biol.* **2019**, *15*(8), 776-785.
36. Güngör, T.; Önder, F. C.; Tokay, E.; Gülhan, Ü. G.; Hacıoğlu, N.; Tok, T. T.; Çelik, A.; Köçkar, F.; Ay, M. Prodrugs for nitroreductase based cancer therapy-2: Novel amide/Ntr combinations targeting PC3 cancer cells. *Eur. J. Med. Chem.* **2019**, *171*, 383-400.
37. Monroe, A.; Salembier, H.; Bousquet, T.; Pellegrini, S.; Péliniski, L. Diethyloxalate as “CO” Source for Palladium-Catalyzed Ethoxycarbonylation of Bromo-and Chloroarene Derivatives. *Adv. Synth. Catal.* **2017**, *359*(15), 2699-2704.
38. Fu, Y.; Zhang, L.; Sun, M.; Cao, L.; Yang, L.; Cheng, R.; Ma, Y.; Ye, J. Direct Electrochemical Ritter-Type Amination of Electron-Deficient Arenes. *Eur. J. Org. Chem.* **2023**, *26*(35), e202300553.
39. Taily, I. M.; Saha, D.; Banerjee, P. Direct Synthesis of Paracetamol via Site-Selective Electrochemical Ritter-type C–H Amination of Phenol. *Org. Lett.* **2022**, *24*(12), 2310-2314.
40. Wang, P.; Mondal, M.; Wang, Y. Photolabile Carbonyl Protecting Group: A New Tool for Light-Controlled Release of Anticancer Agents. *Eur. J. Org. Chem.* **2009**, *13*, 2055-2058.

41. Zou, L.; Li, P.; Wang, B.; Wang, L. Visible-light-induced Pd-catalyzed ortho-trifluoromethylation of acetanilides with CF<sub>3</sub>SO<sub>2</sub>Na under ambient conditions in the absence of an external photocatalyst. *Chem. Commun.* **2019**, 55(26), 3737-3740.
42. Mair, B. A.; Fouad, M. H.; Ismailani, U. S.; Munch, M.; Rotstein, B. H. Rhodium-catalyzed addition of organozinc iodides to carbon-11 isocyanates. *Org. Lett.* **2020**, 22(7), 2746-2750.
43. Lin, Z.; Jin, J.; Qiao, J.; Tong, J.; Shen, C. Facile fabrication of glycosylpyridyl-Triazole@ Nickel nanoparticles as recyclable nanocatalyst for acylation of amines in water. *Catalysts* **2020**, 10(2), 230.
44. Wang, S. M.; Zhao, C.; Zhang, X.; Qin, H. L. Clickable coupling of carboxylic acids and amines at room temperature mediated by SO<sub>2</sub>F<sub>2</sub>: a significant breakthrough for the construction of amides and peptide linkages. *Org. Biomol. Chem.* **2019**, 17(16), 4087-4101.
45. Luo, Q. L.; Lv, L.; Li, Y.; Tan, J. P.; Nan, W.; Hui, Q. An efficient protocol for the amidation of carboxylic acids promoted by trimethyl phosphite and iodine. *Eur. J. Org. Chem.* **2011**, 2011(34), 6916-6922.
46. Losev, M. A.; Kozlov, A. S.; Kharitonov, V. B.; Afanasyev, O. I.; Kliuev, F. S.; Bulygina, L. A.; Khrushcheva, D. A.; Loginov, D. A.; Chusov, D. Reductive coupling of nitroarenes with carboxylic acids – a direct route to amide synthesis. *Org. Biomol. Chem.* **2023**, 21(42), 8477-8481.
47. Naik, S.; Bhattacharjya, G.; Talukdar, B.; Patel, B.K. Chemoselective acylation of amines in aqueous media. *Eur. J. Org. Chem.* **2004**, 2004(6), 1254-1260.
48. Alisi, M. A.; Brufani, M.; Cazzolla, N.; Ceccacci, F.; Dragone, P.; Felici, M.; Furlotti, G.; Garofalo, B.; La Bella, A.; Lanzalunga, O.; Leonelli, F. DPPH radical scavenging activity of paracetamol analogues. *Tetrahedron* **2012**, 68(49), 10180-10187.
49. He, Z. T.; Hartwig, J. F. Palladium-catalyzed  $\alpha$ -arylation of carboxylic acids and secondary amides via a traceless protecting strategy. *J. Am. Chem. Soc.* **2019**, 141(30), 11749-11753.
50. Yuan, Y.; Guo, D.; Liu, Y.; Wan, C.; Lu, D.; Yang, H.; Lu, Y.; Meng, W.; Wang, H.; Zhang, X. Iron (III)-Mediated Nucleophilic Halogenation of Phenols Using an Amido Directing Group. *Eur. J. Org. Chem.* **2022**, 2022(17), e202200387.
51. Sang, J. W.; Li, Q.; Zhang, C.; Zhang, Y.; Wang, J.; Zhang, W. D. Nickel/Photoredox-Catalyzed Direct Amidation of Aldehydes with Nitroarenes via Fully Catalytic Process. *Org. Lett.* **2023**, 25(24), 4592-4597.

## 9. Copies of $^1\text{H}$ NMR, $^{13}\text{C}$ NMR and $^{19}\text{F}$ NMR Spectra of Products

$^1\text{H}$  and  $^{13}\text{C}$  NMR *N*-(2,5-bis(trifluoromethyl)phenyl)acetamide (**2a**)

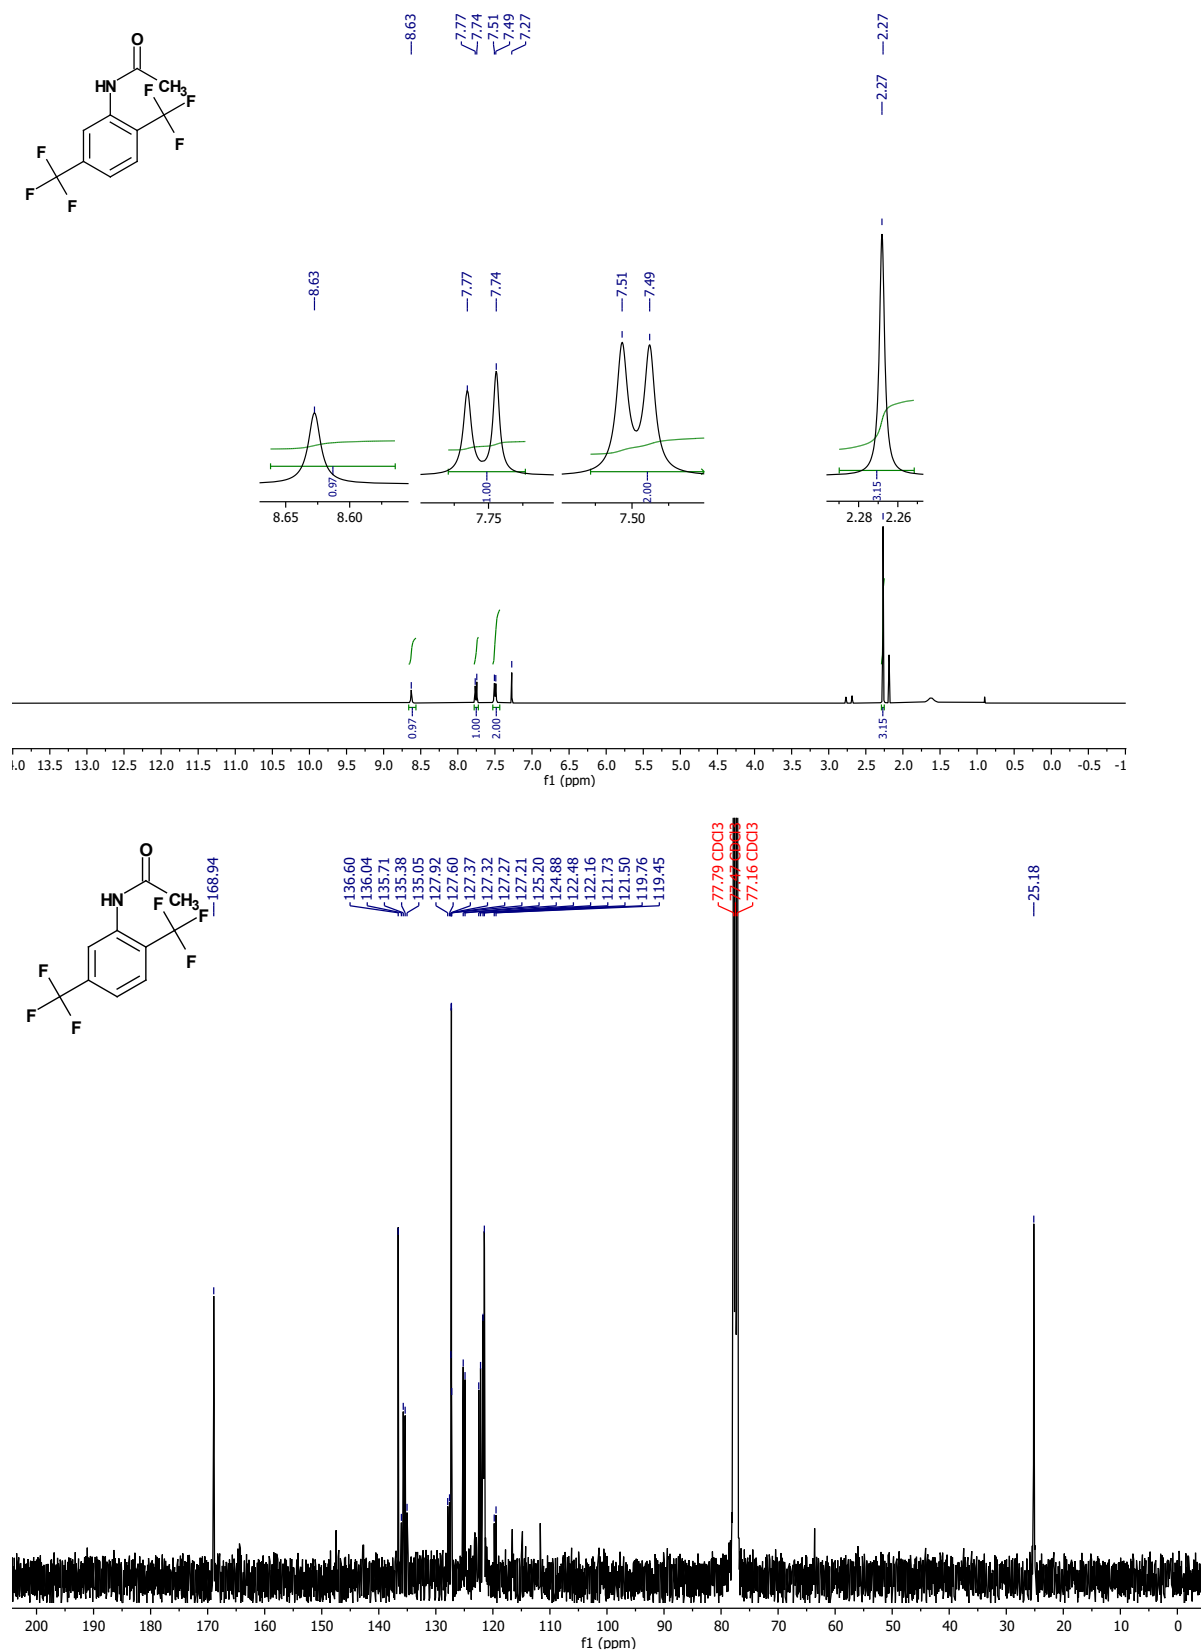



$^{19}\text{F}$  NMR *N*-(2,5-bis(trifluoromethyl)phenyl)acetamide (**2a**)

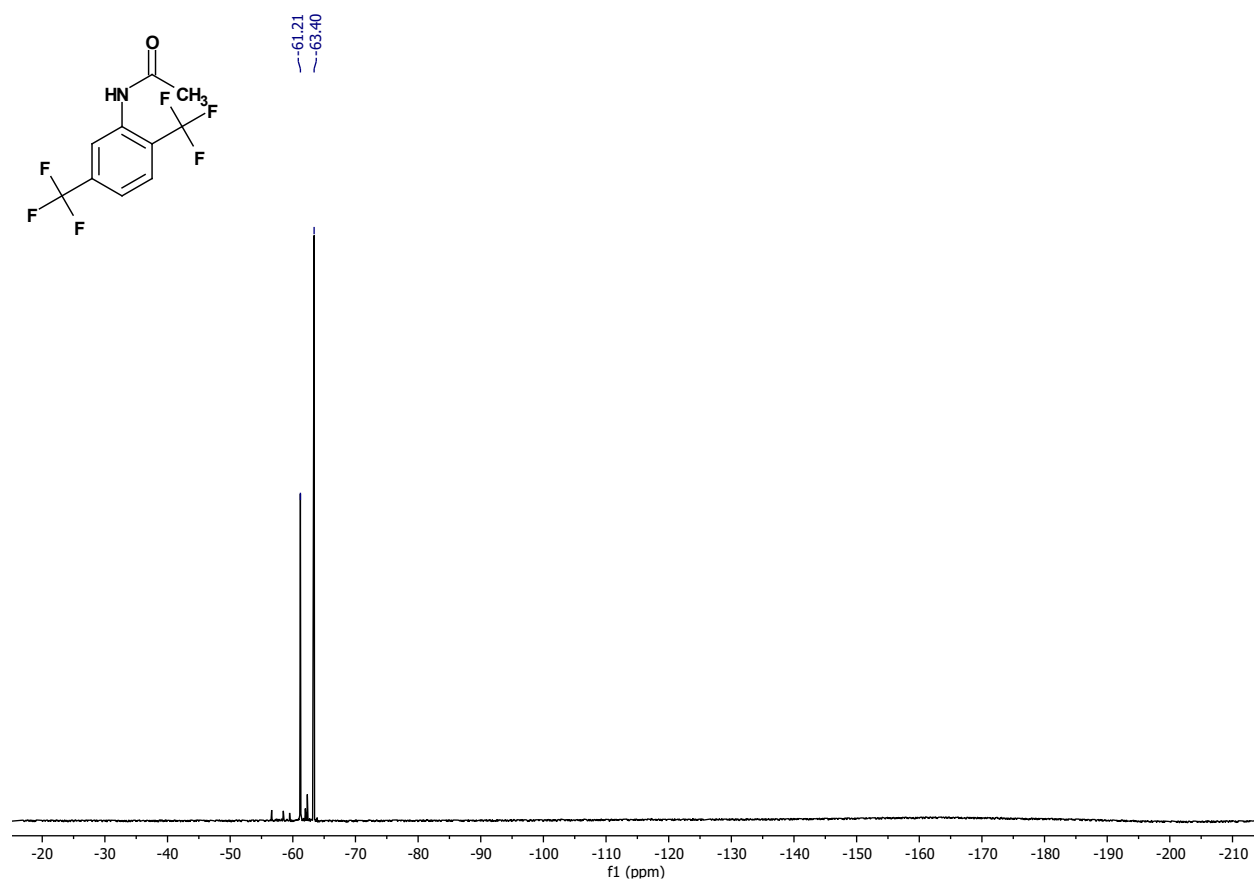

$^1\text{H}$  and  $^{13}\text{C}$  NMR *N*-(2,6-bis(trifluoromethyl)phenyl)acetamide (**2b**)

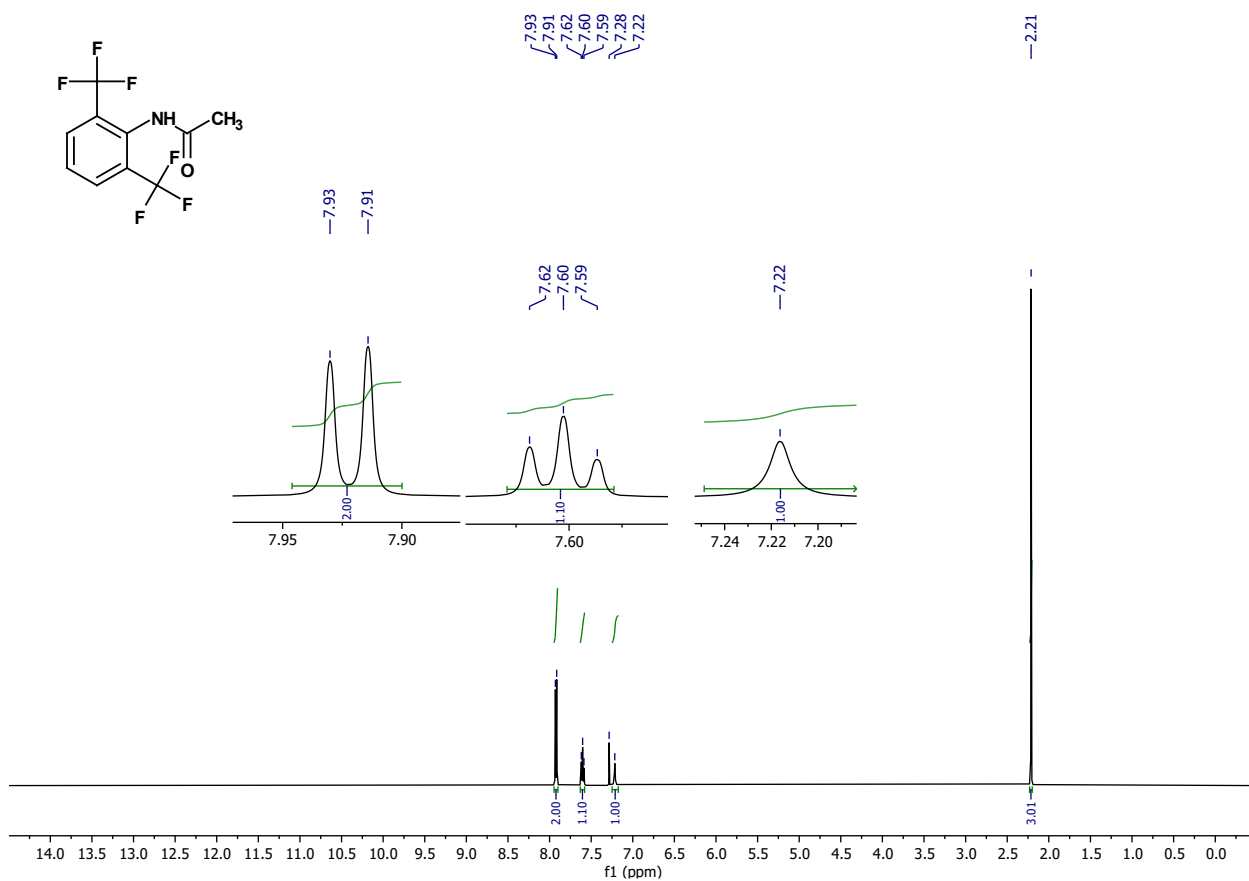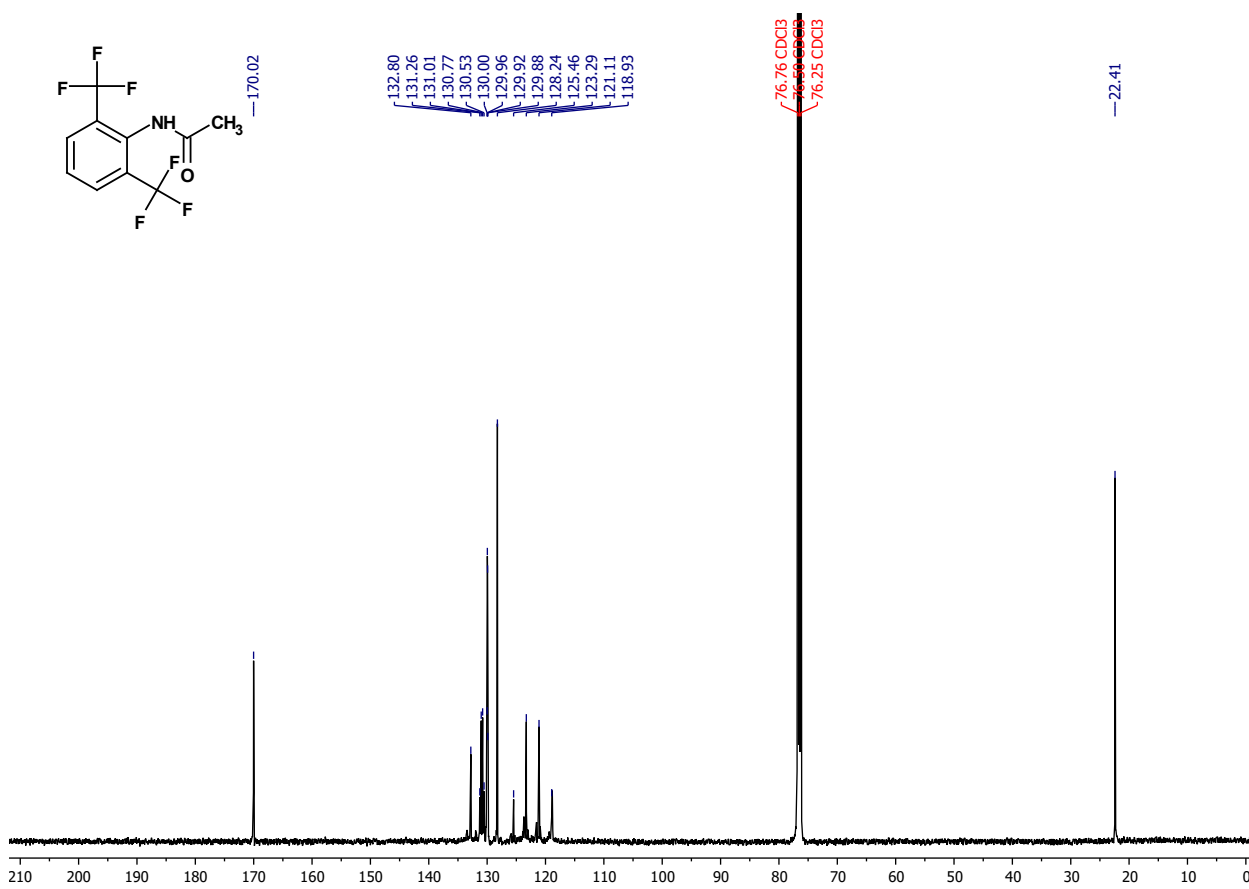

$^{19}\text{F}$  NMR *N*-(2,6-bis(trifluoromethyl)phenyl)acetamide (**2b**)

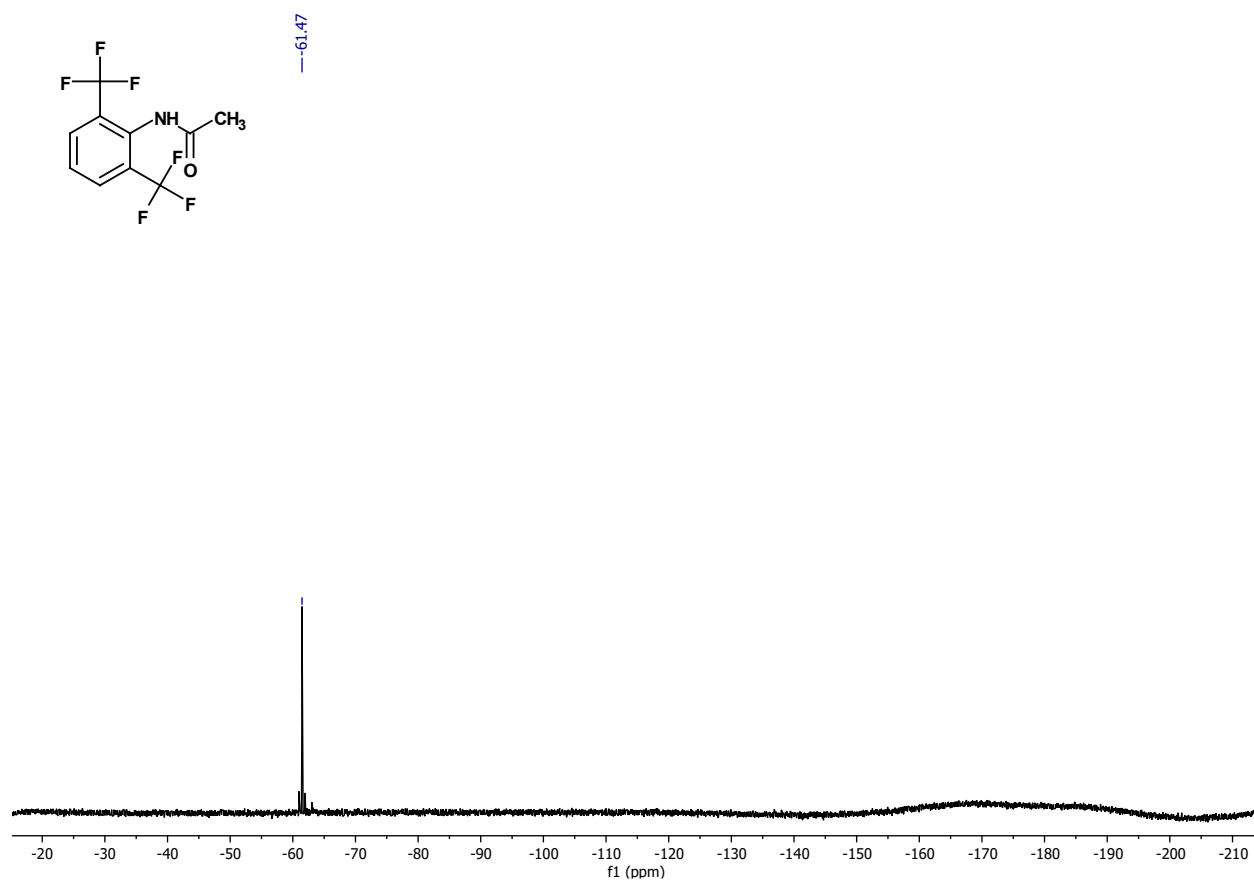

**COSY** NMR *N*-(2,6-bis(trifluoromethyl)phenyl)acetamide (**2b**)

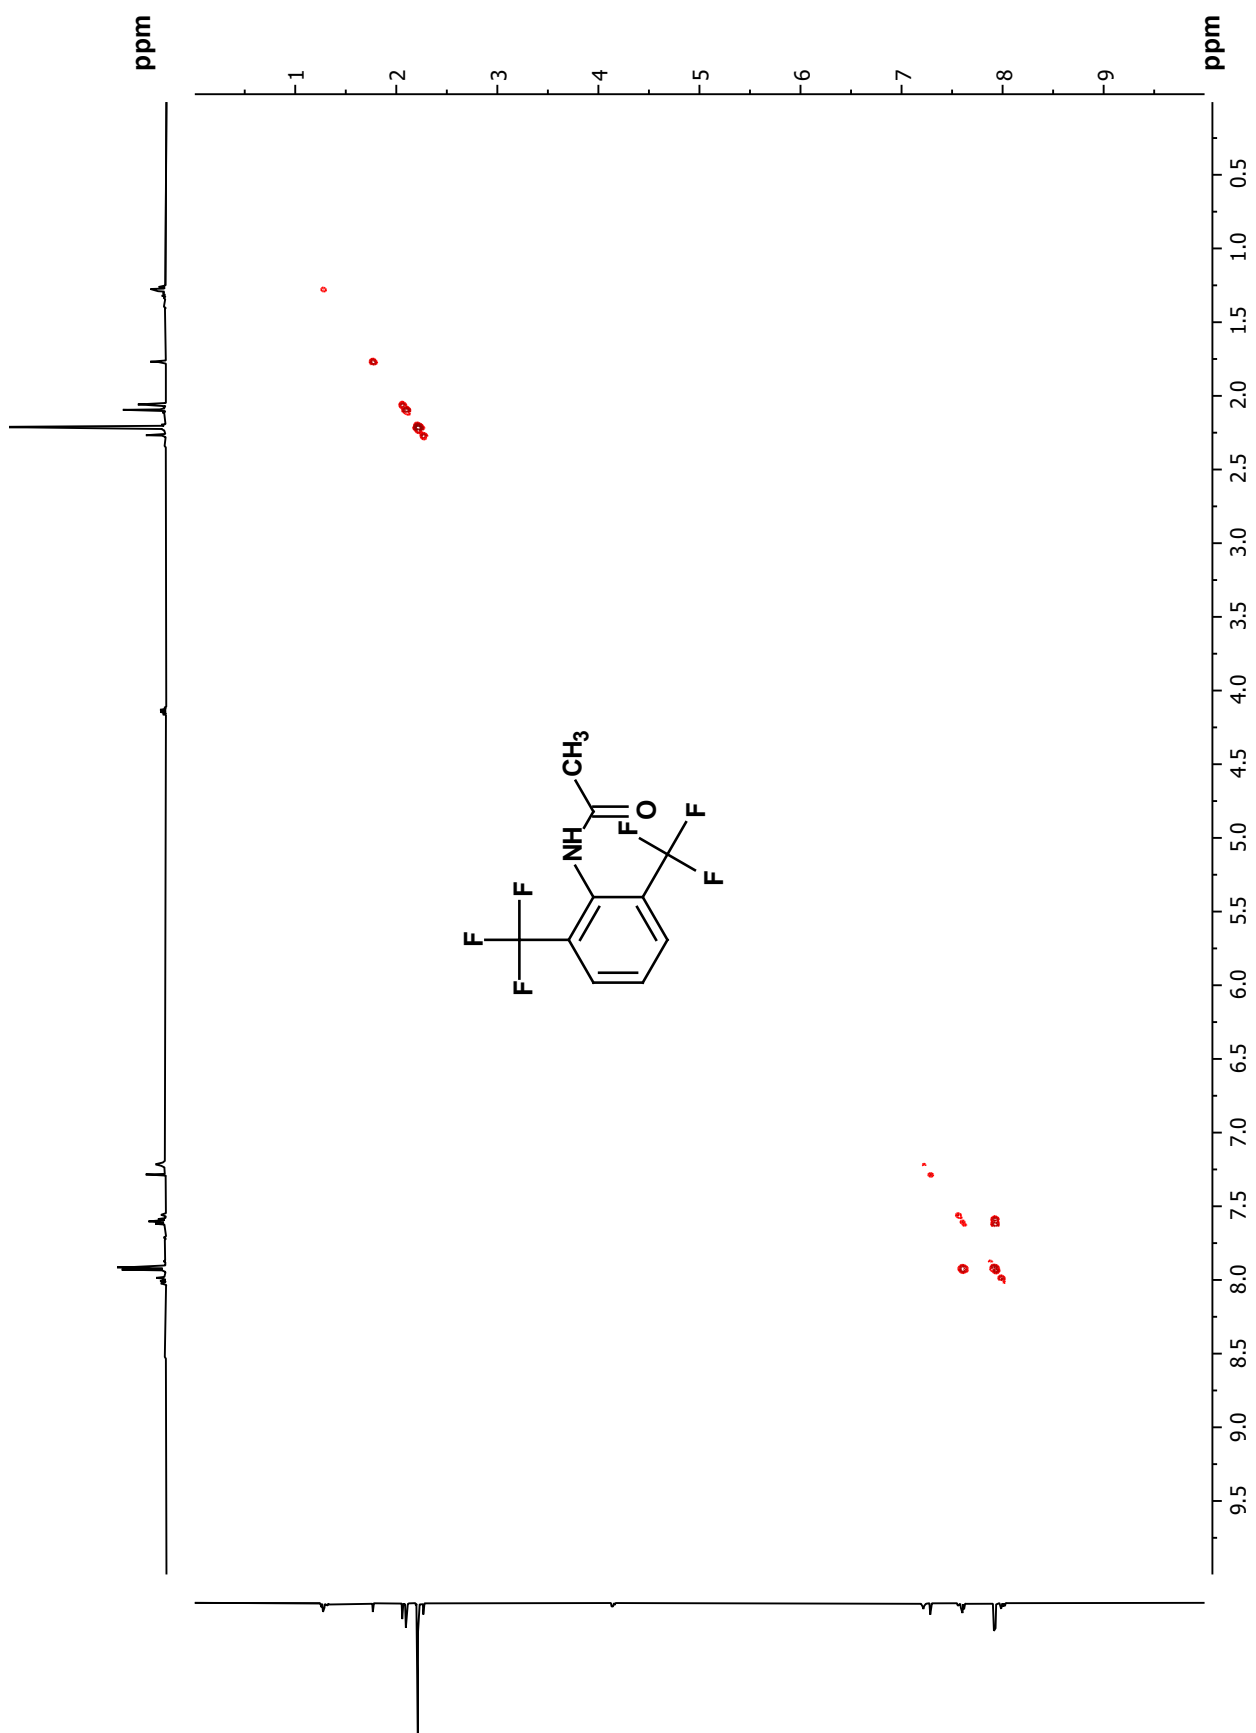

**HSQC** NMR *N*-(2,6-bis(trifluoromethyl)phenyl)acetamide (**2b**)

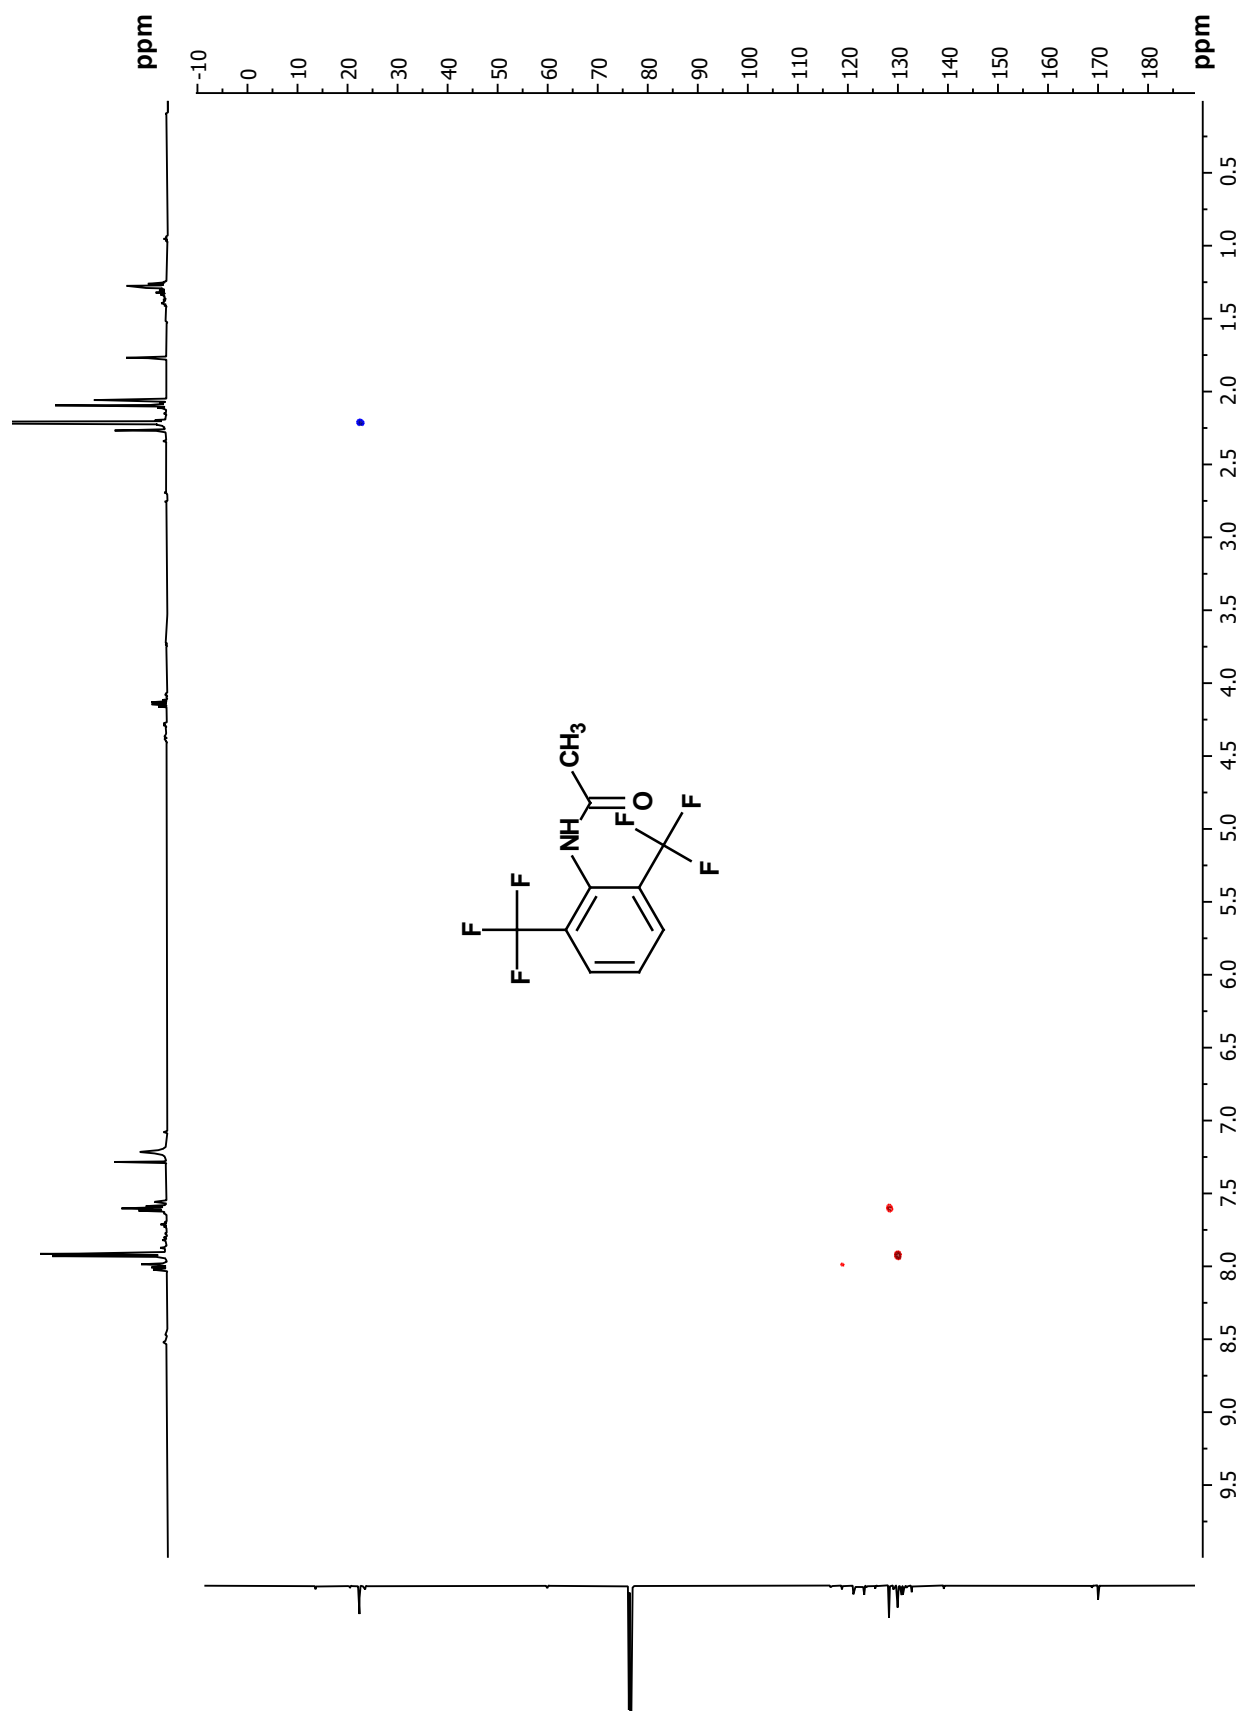

**HMBC** NMR *N*-(2,6-bis(trifluoromethyl)phenyl)acetamide (**2b**)

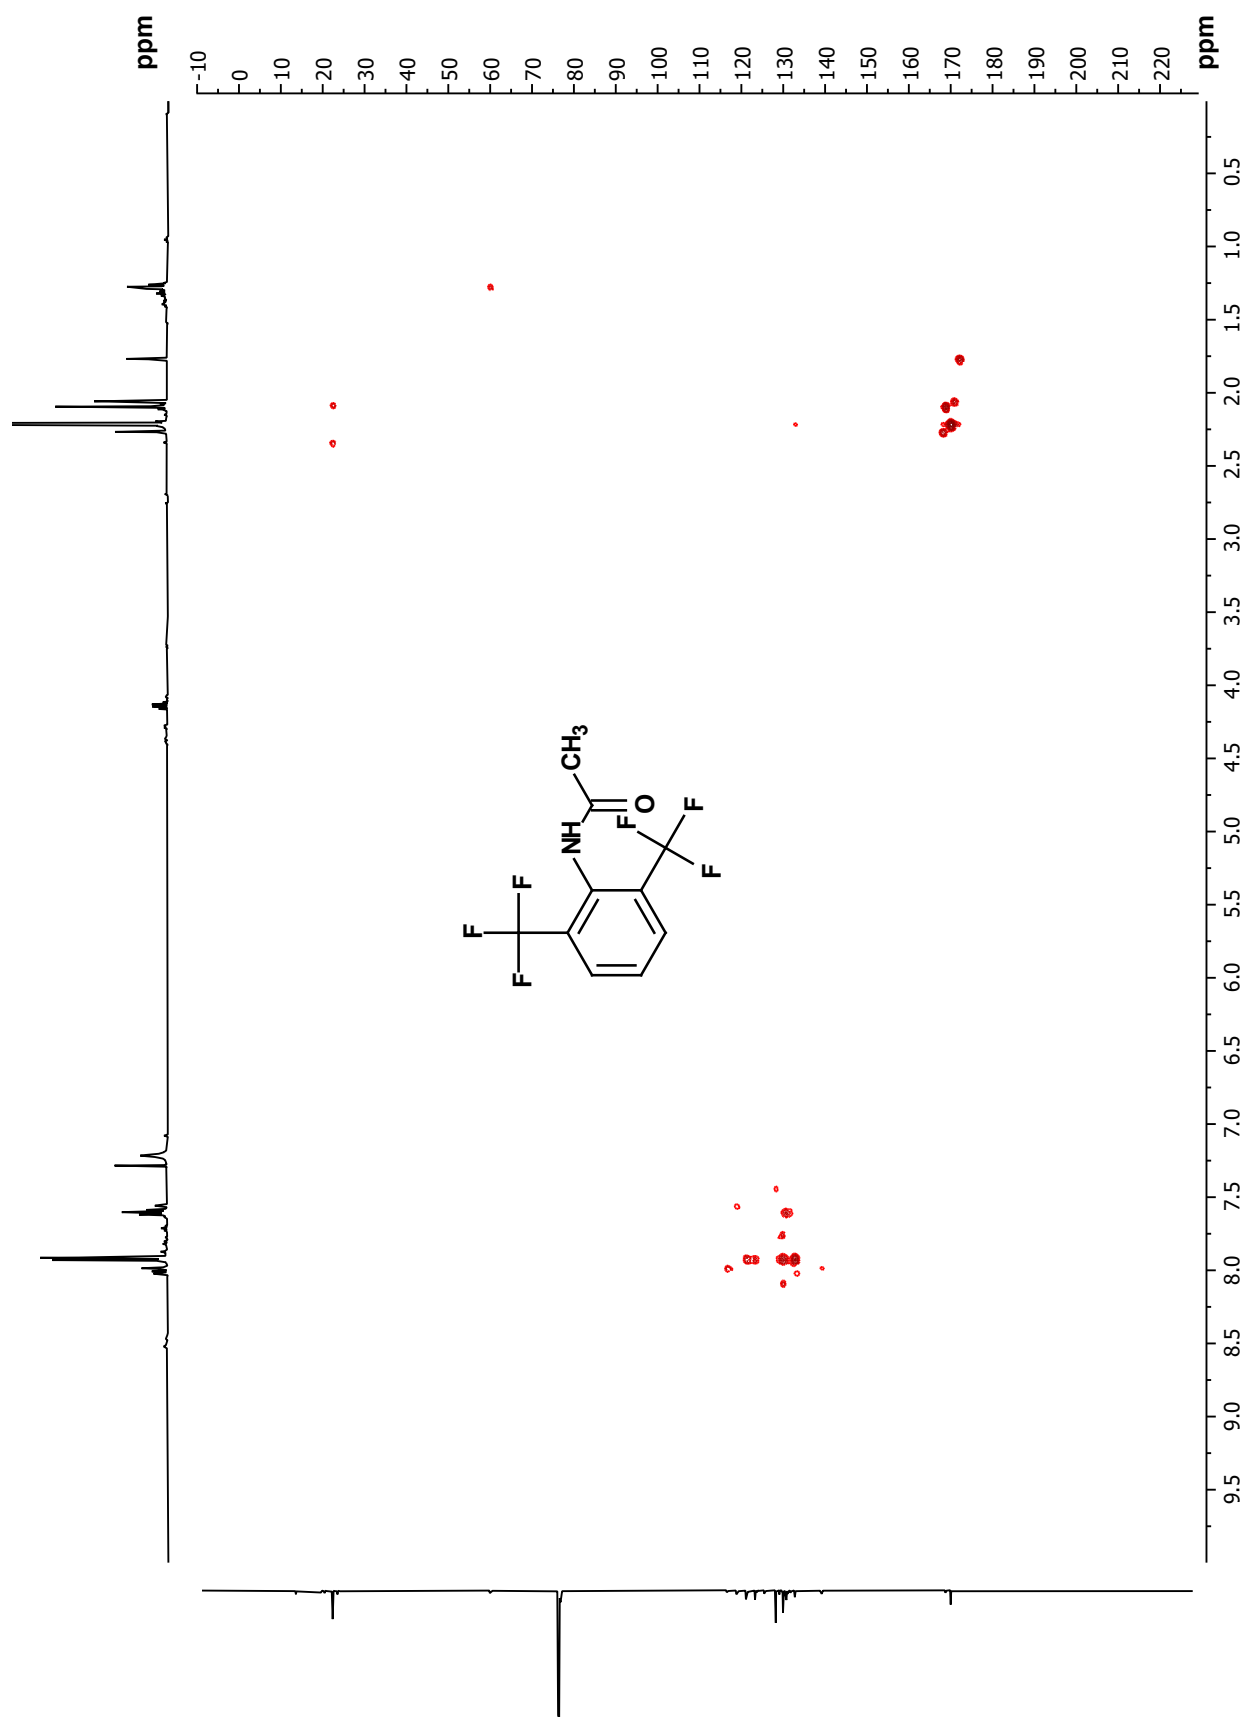

$^1\text{H}$  and  $^{13}\text{C}$  NMR *N*-(2,4,6-tris(trifluoromethyl)phenyl)acetamide (**2c**)

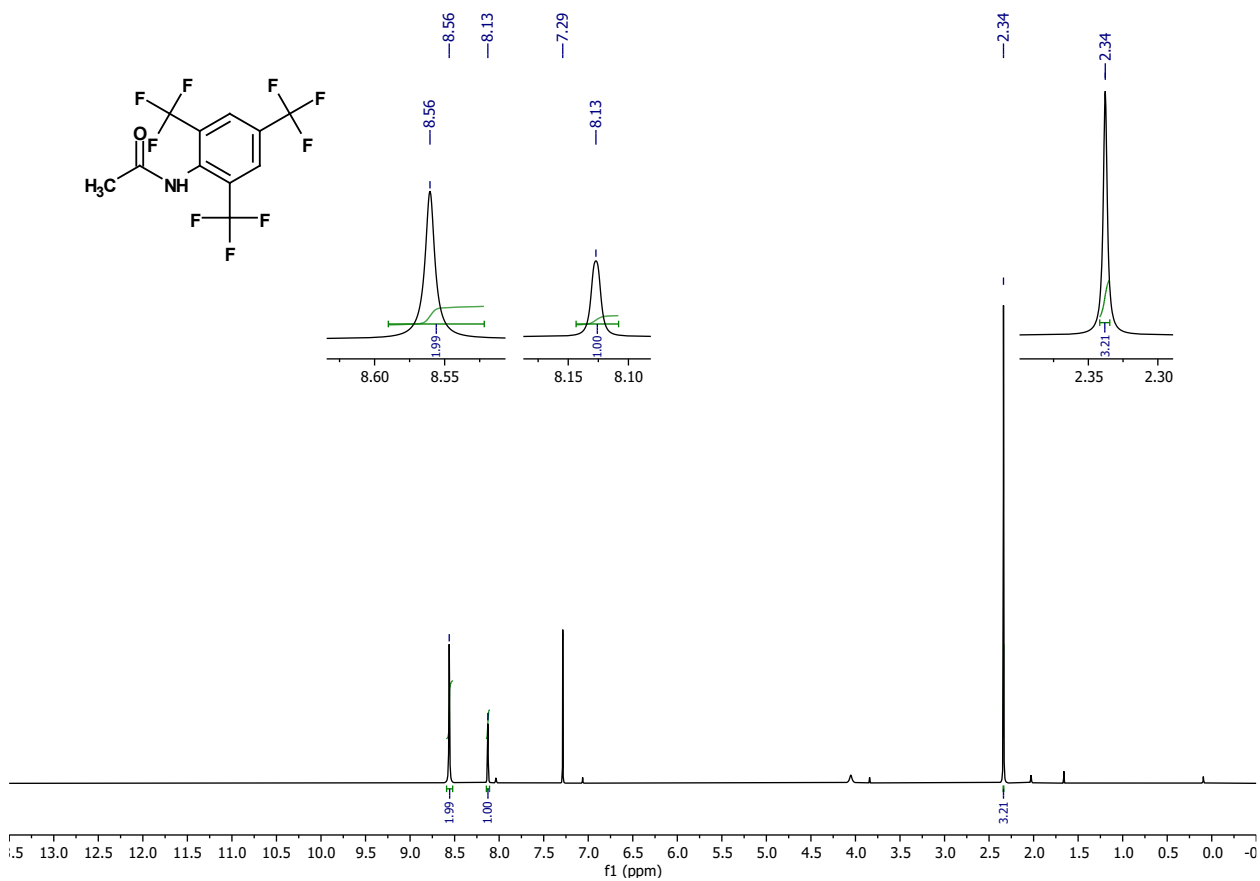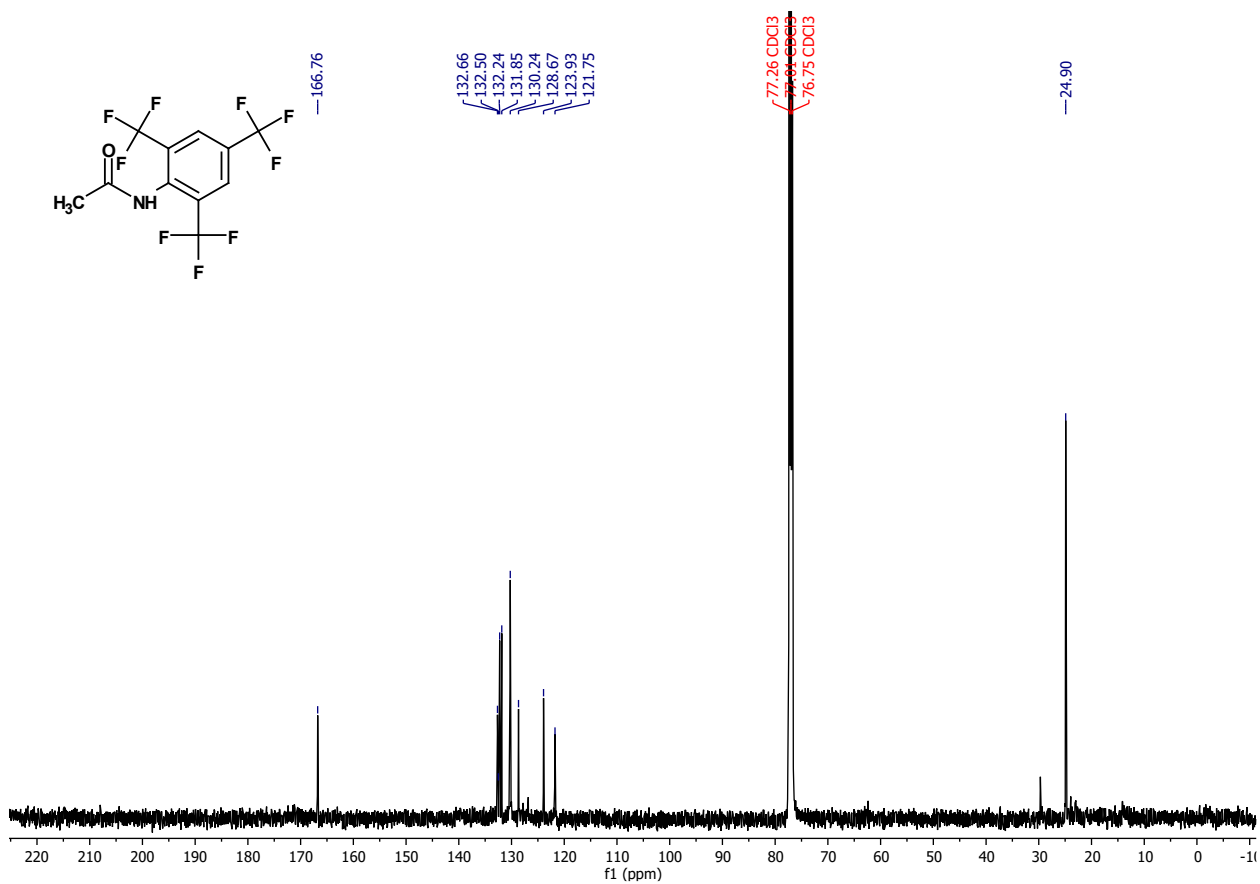

$^{19}\text{F}$  NMR *N*-(2,4,6-tris(trifluoromethyl)phenyl)acetamide (**2c**)

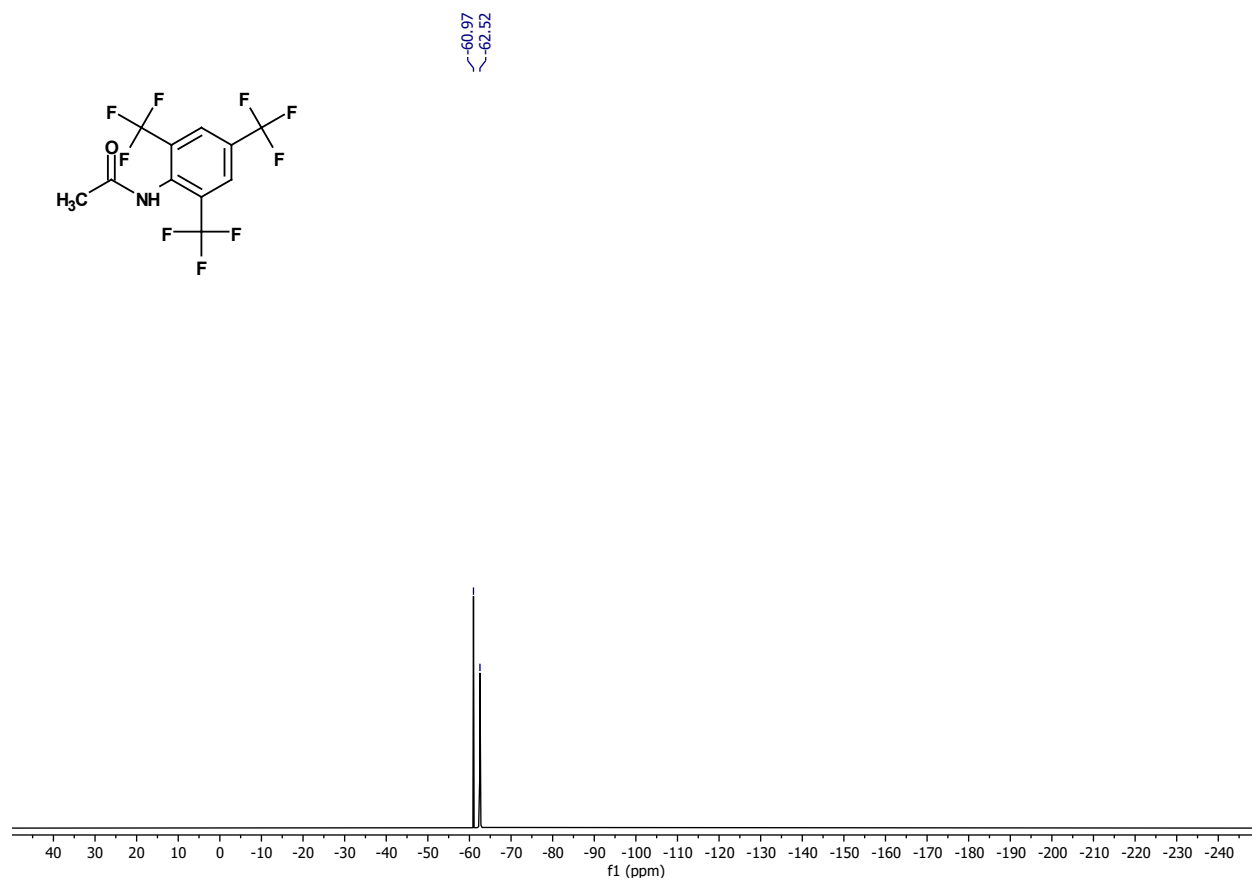



$^1\text{H}$  and  $^{13}\text{C}$  NMR *N*-(2-(trifluoromethyl)phenyl)acetamide (**2d-a**)

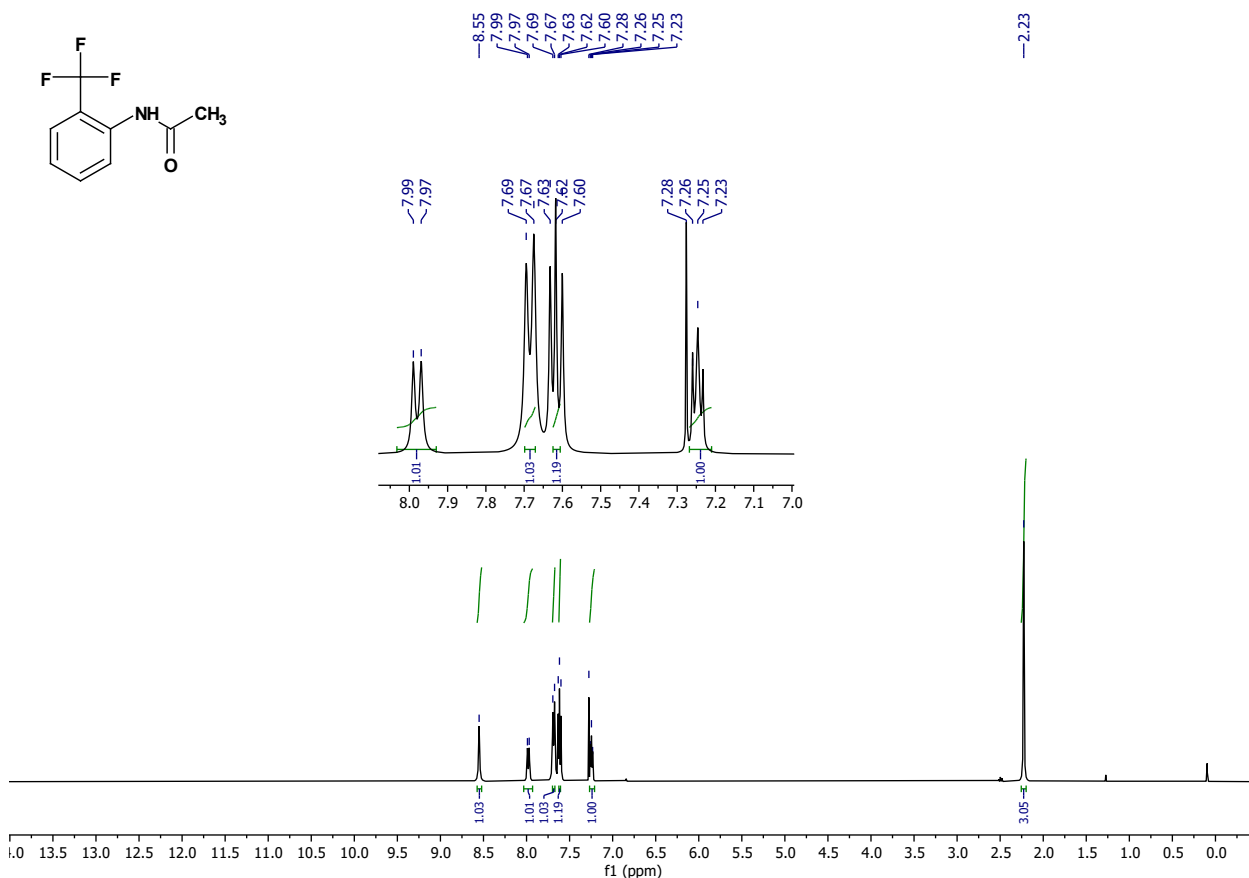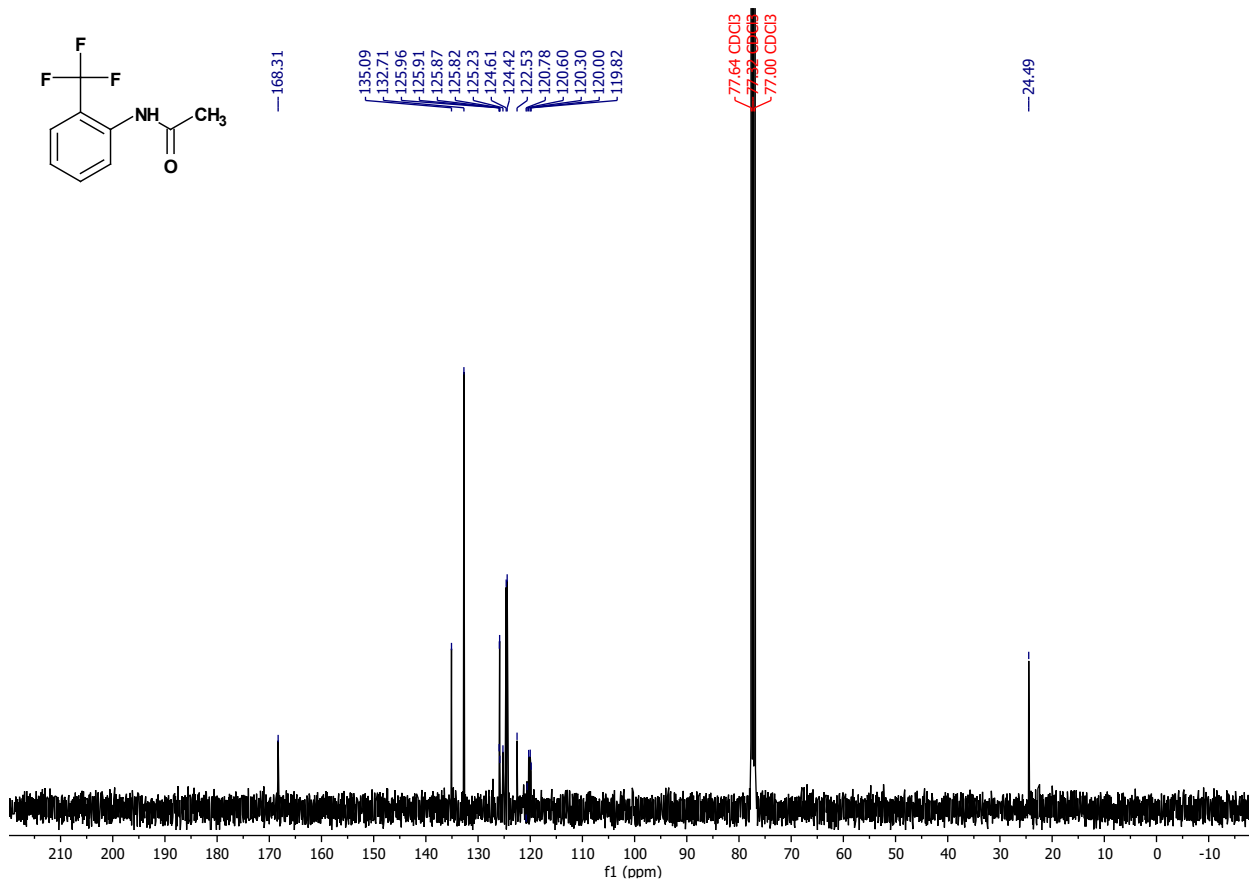

$^{19}\text{F}$  NMR *N*-(2-(trifluoromethyl)phenyl)acetamide (**2d-a**)

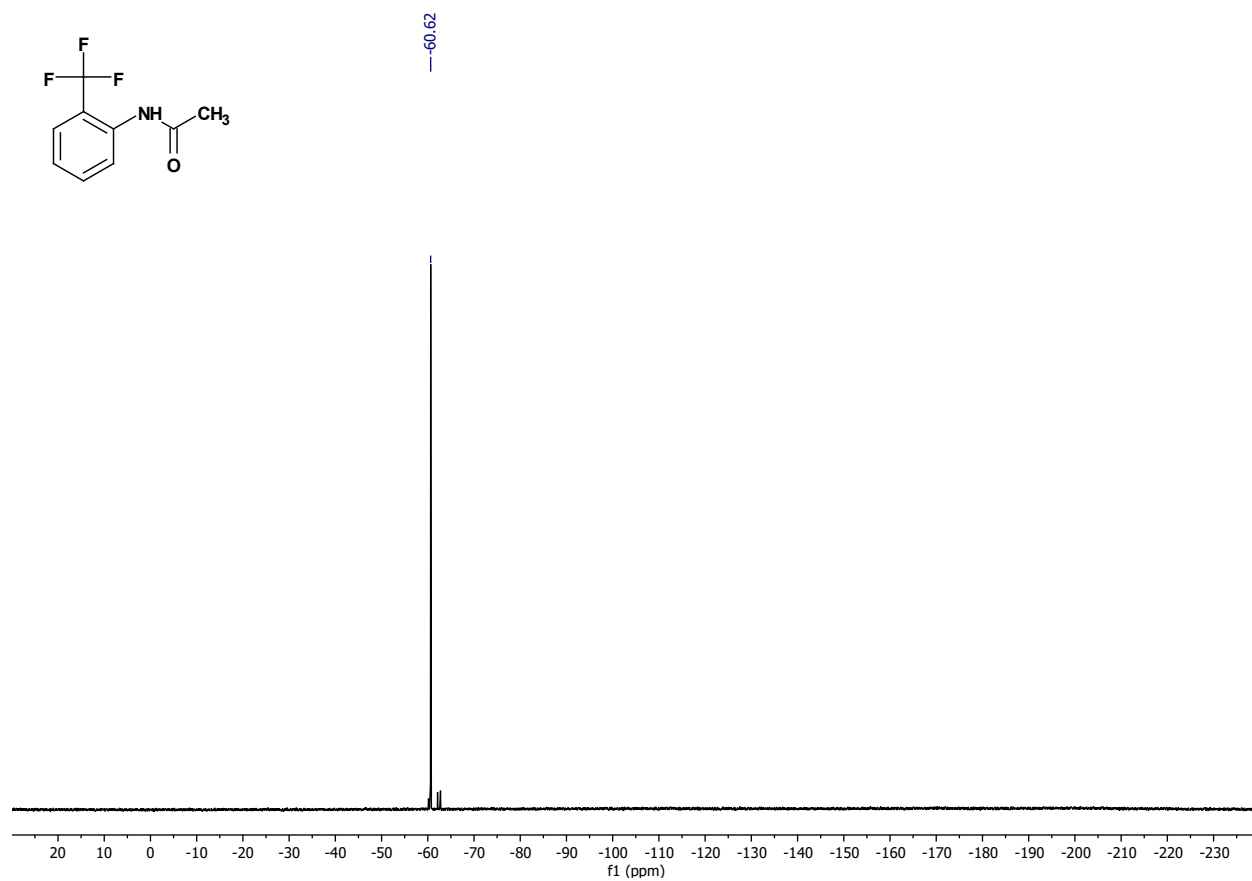

$^1\text{H}$  and  $^{13}\text{C}$  NMR *N*-(3-(trifluoromethyl)phenyl)acetamide (**2d-b**)

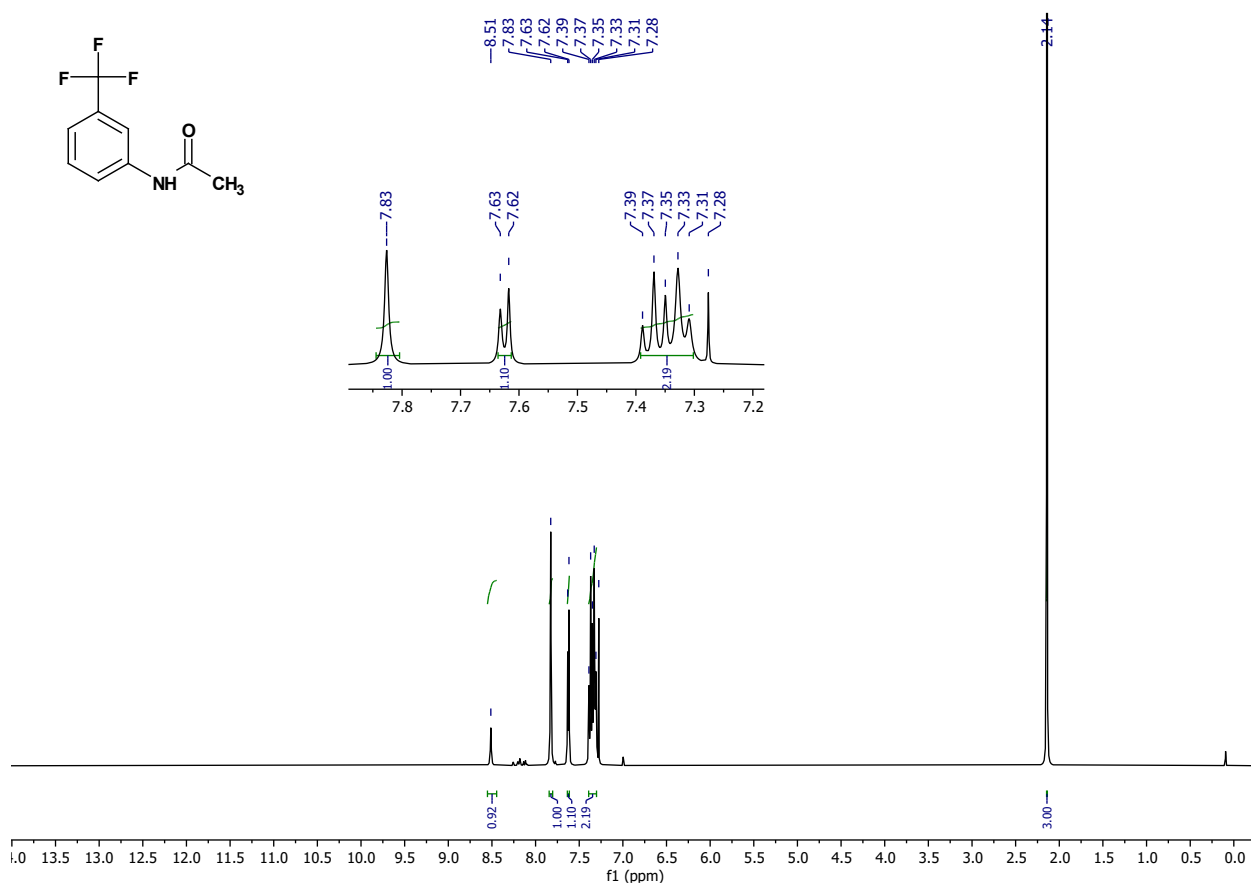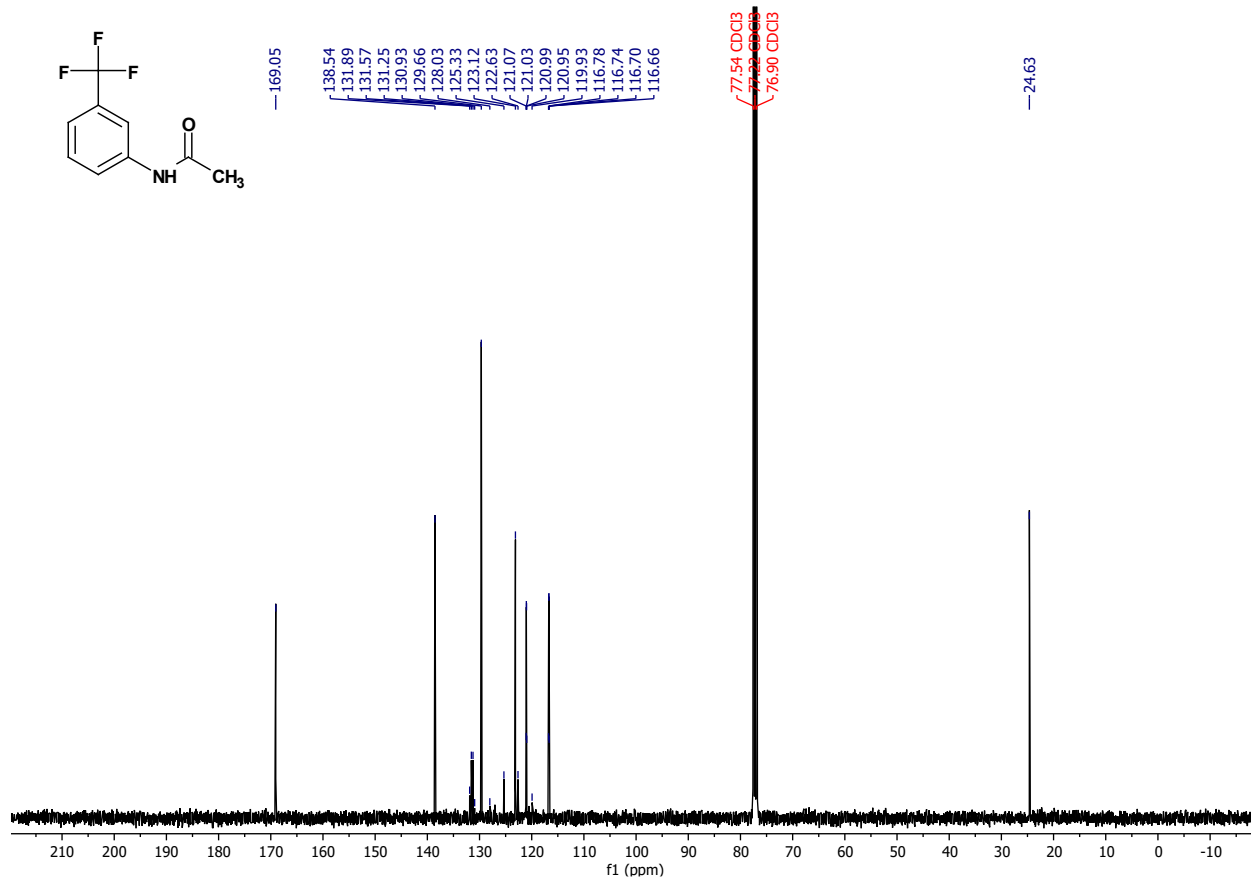

$^{19}\text{F}$  NMR *N*-(3-(trifluoromethyl)phenyl)acetamide (**2d-b**)

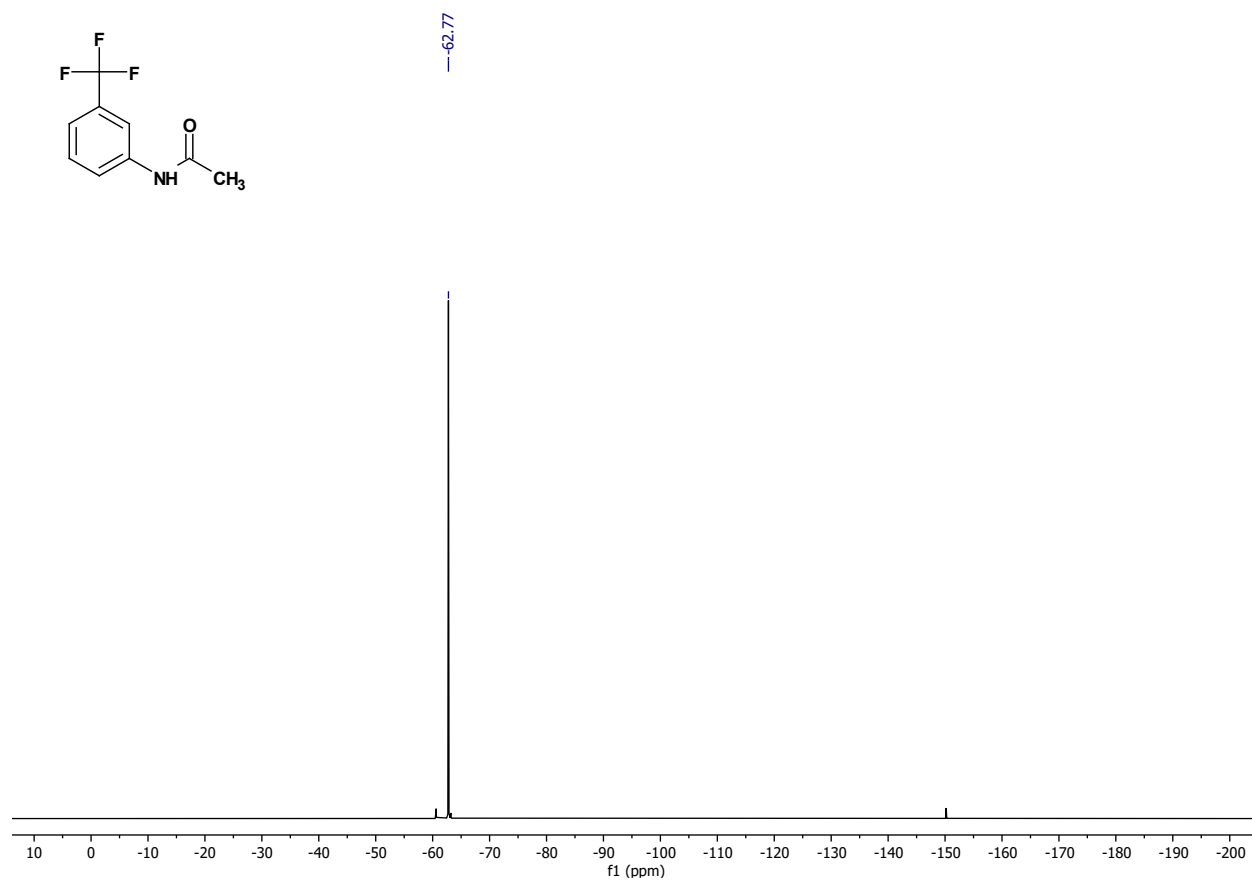

$^1\text{H}$  and  $^{13}\text{C}$  NMR *N*-(4-(trifluoromethyl)phenyl)acetamide (**2d-c**)

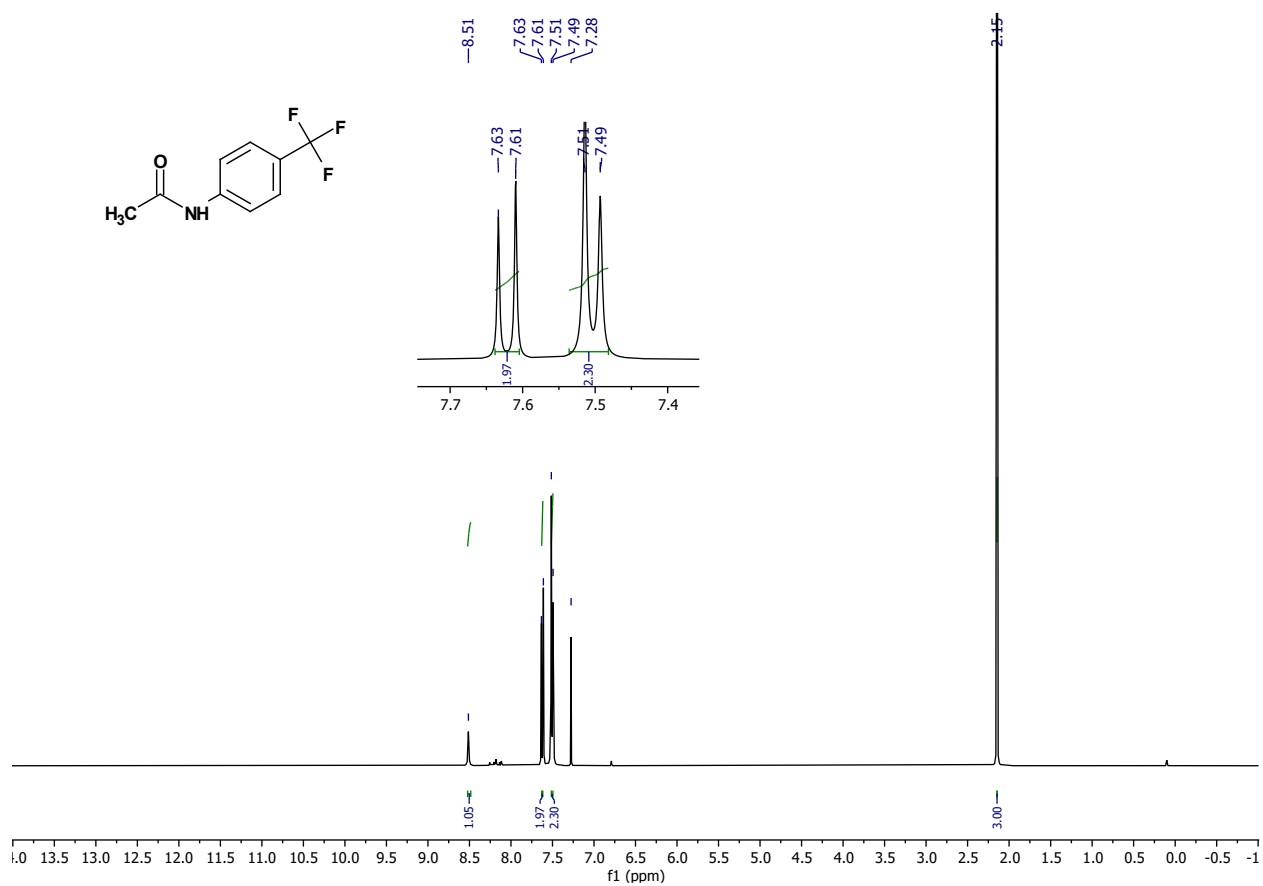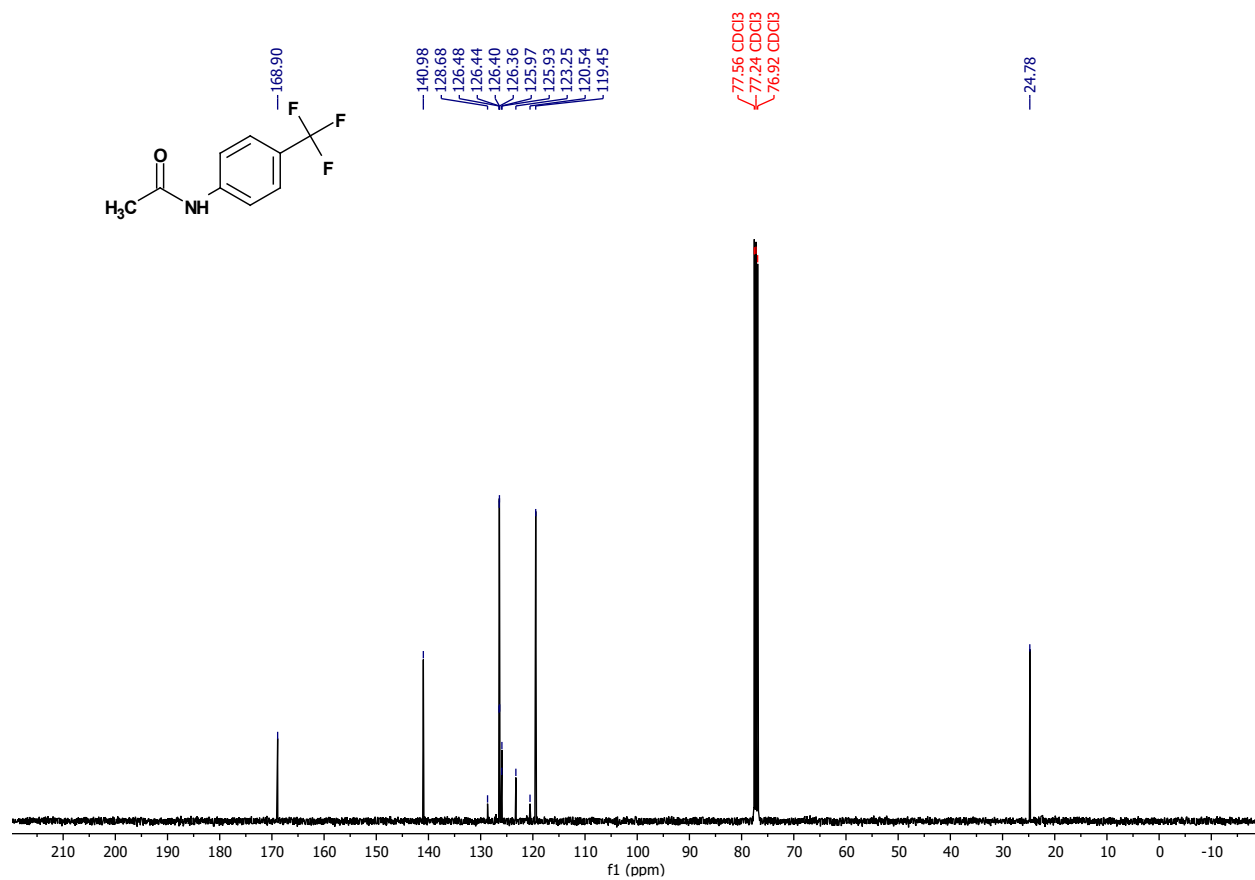

$^{19}\text{F}$  NMR *N*-(4-(trifluoromethyl)phenyl)acetamide (**2d-c**)

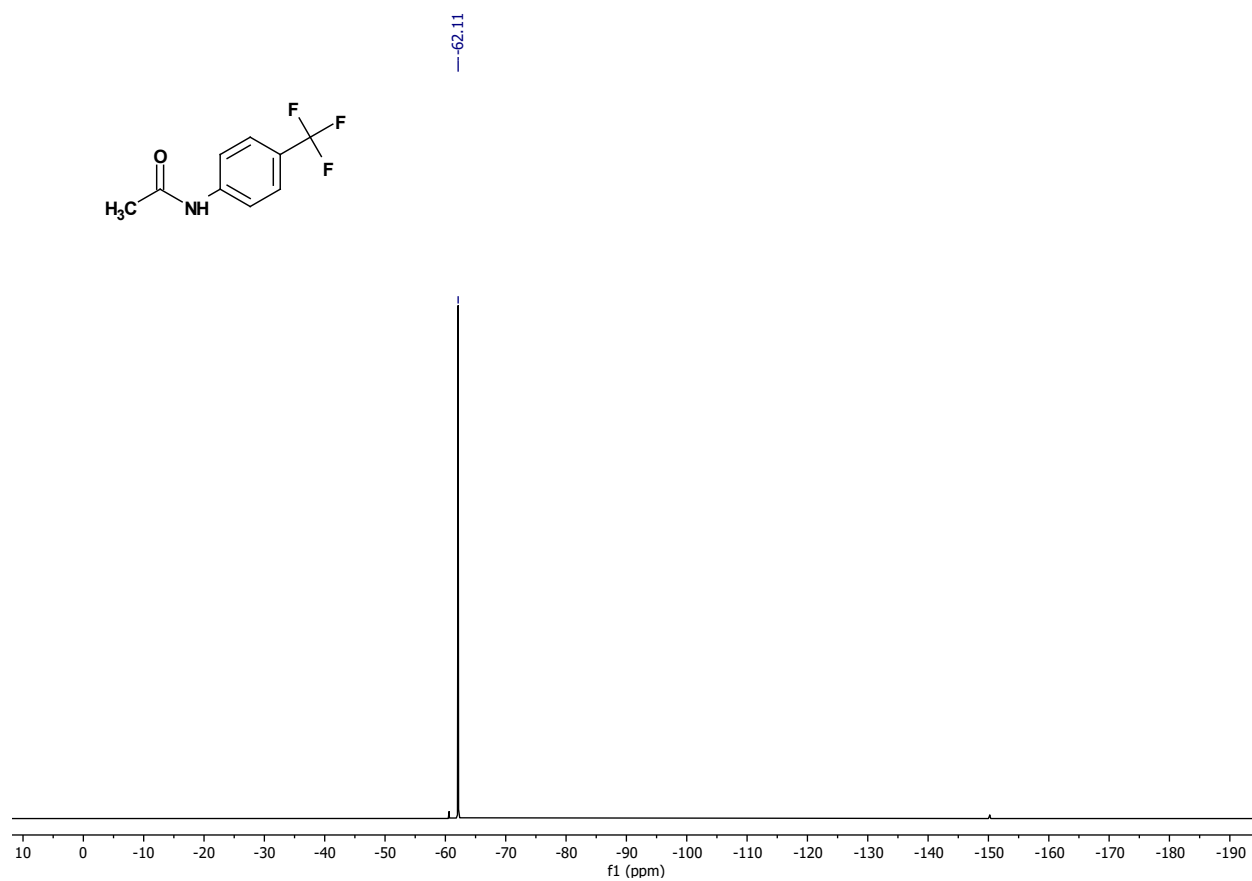

$^1\text{H}$  and  $^{13}\text{C}$  NMR *N*-(2-chloro-5-(trifluoromethyl)phenyl)acetamide (**2e**)

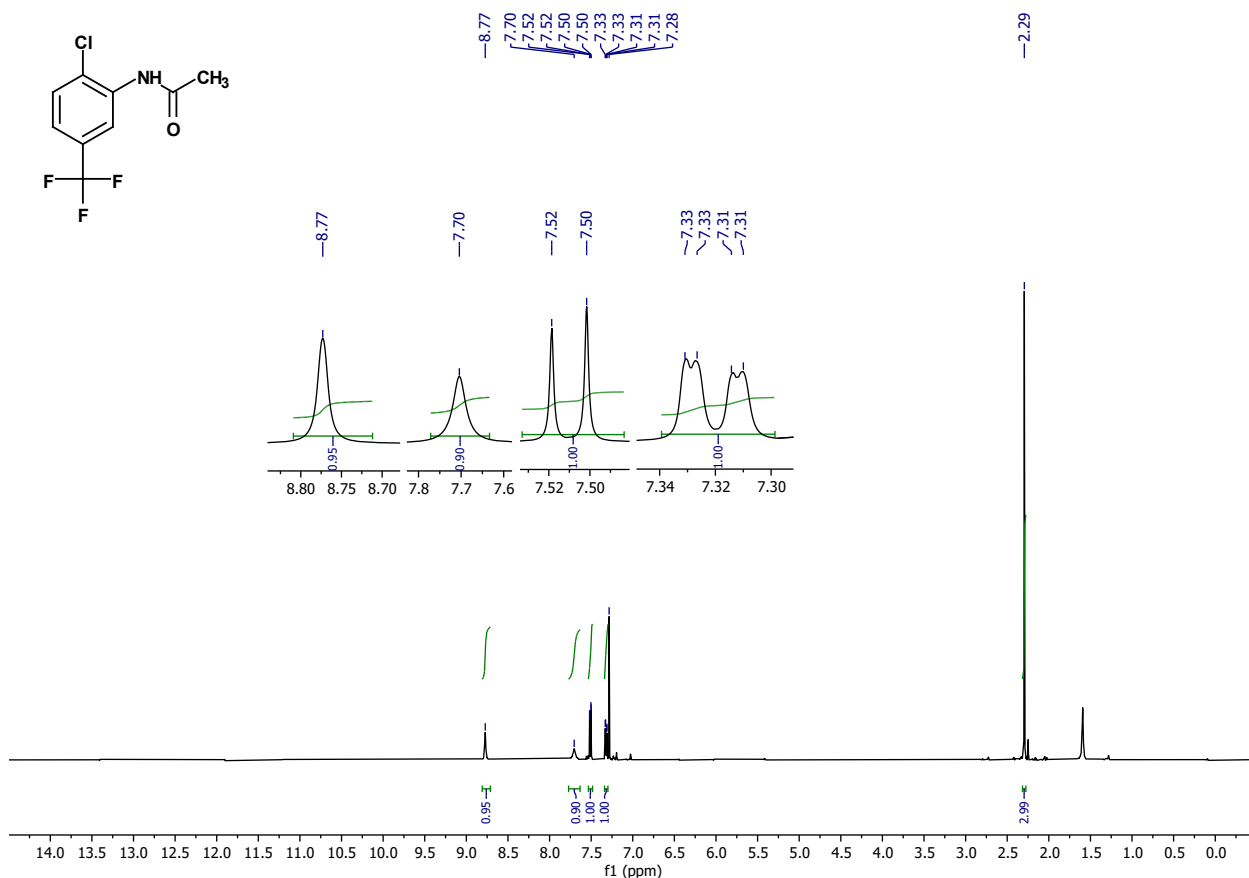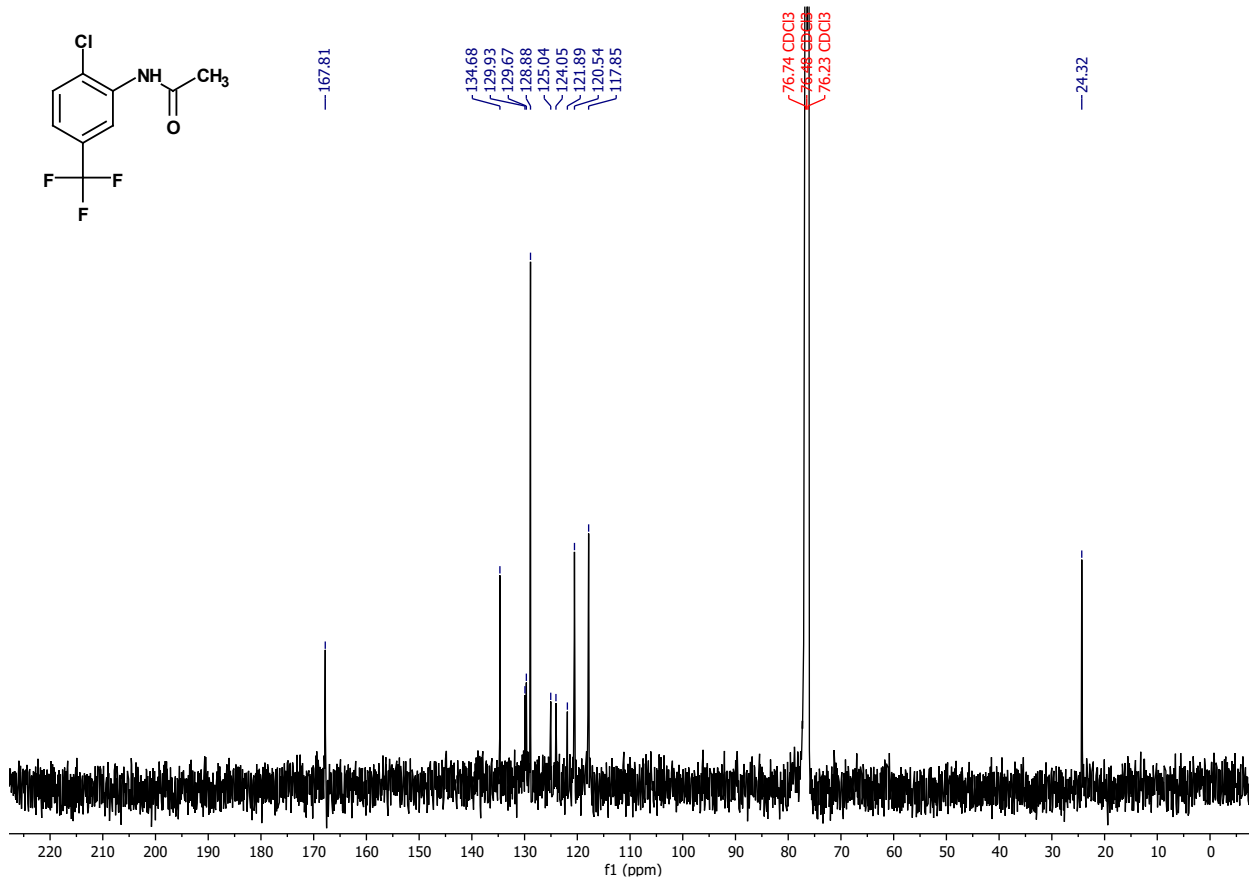

$^{19}\text{F}$  NMR *N*-(2-chloro-5-(trifluoromethyl)phenyl)acetamide (**2e**)

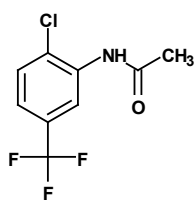

-62.73

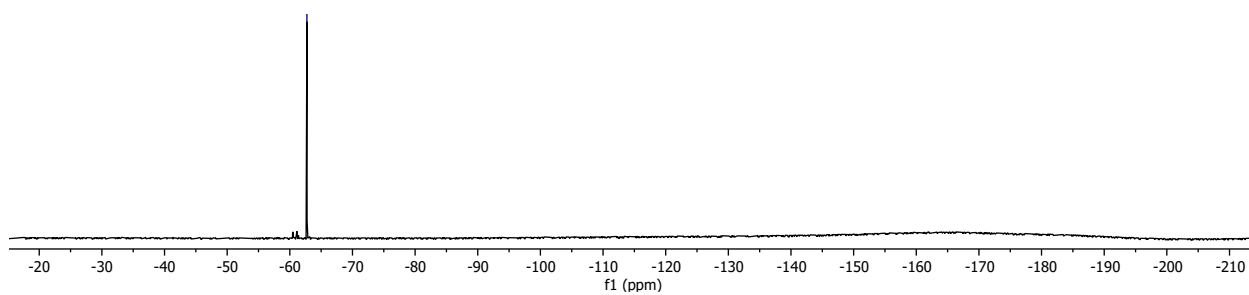



**COSY** NMR *N*-(2-chloro-5-(trifluoromethyl)phenyl)acetamide (**2e**)

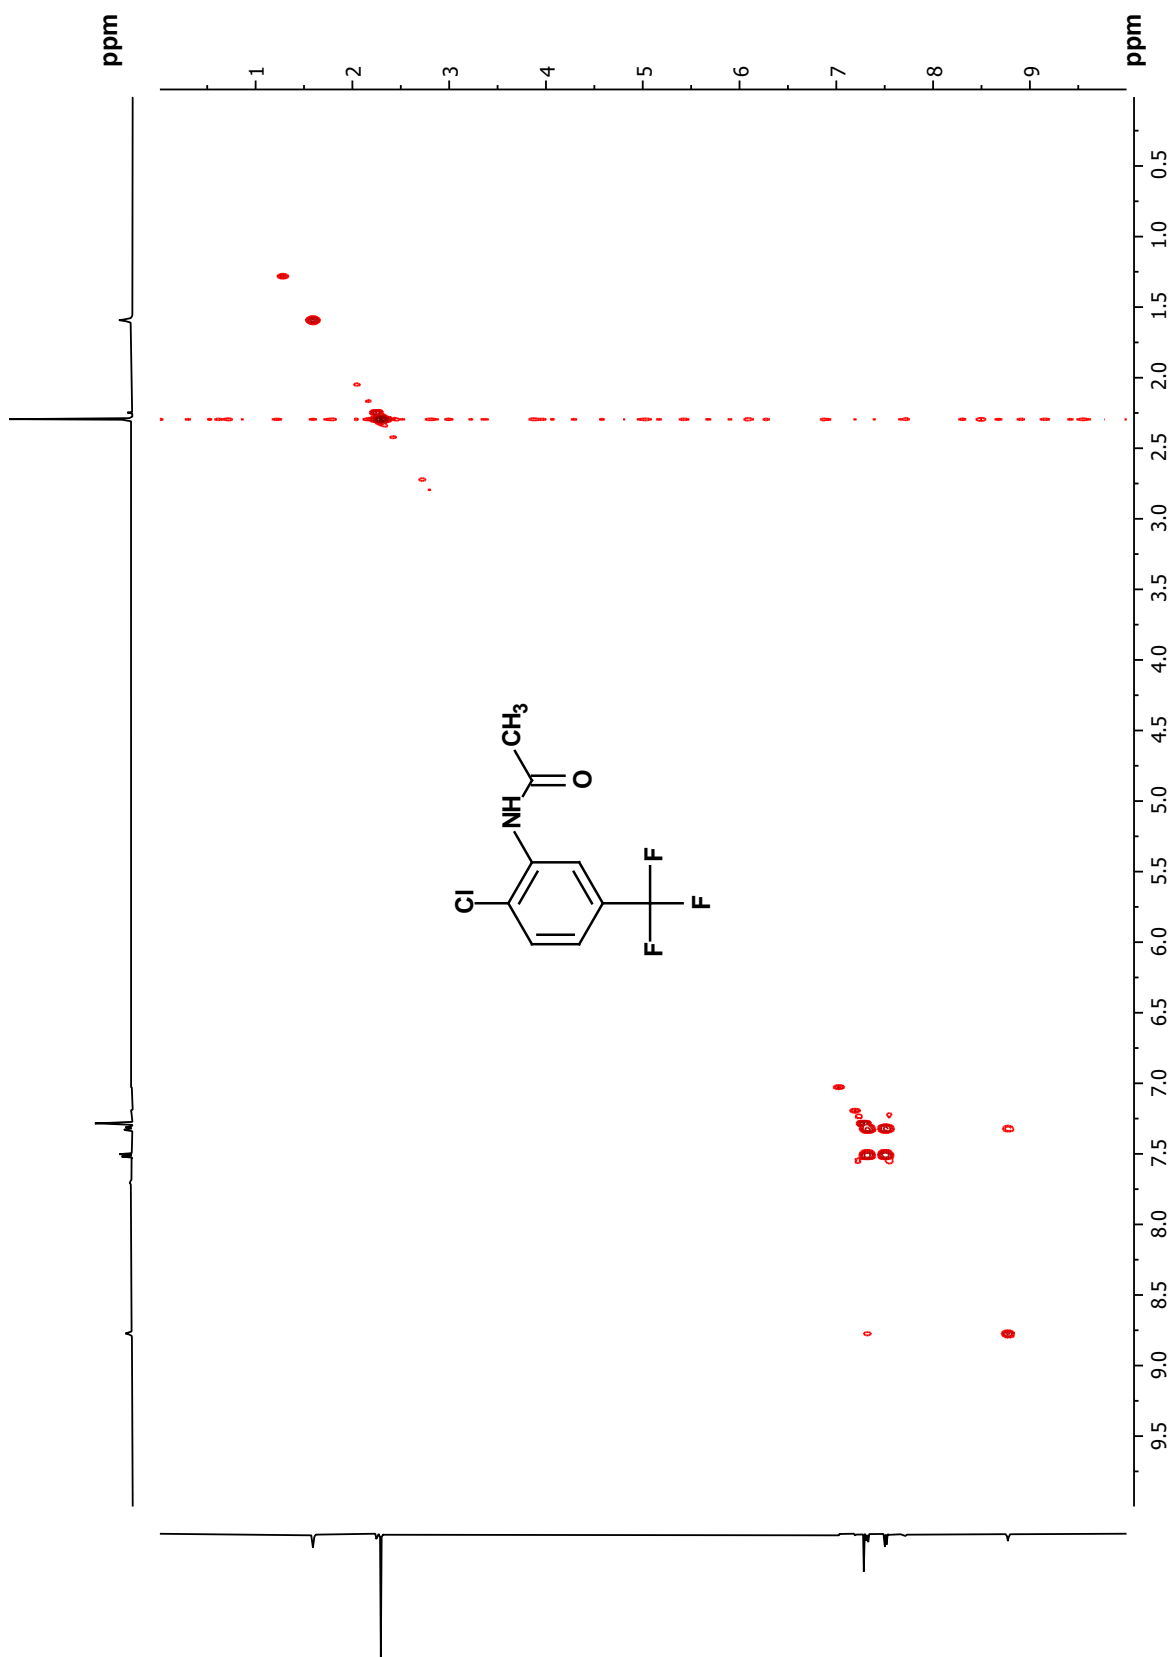

HSQC NMR *N*-(2-chloro-5-(trifluoromethyl)phenyl)acetamide (**2e**)

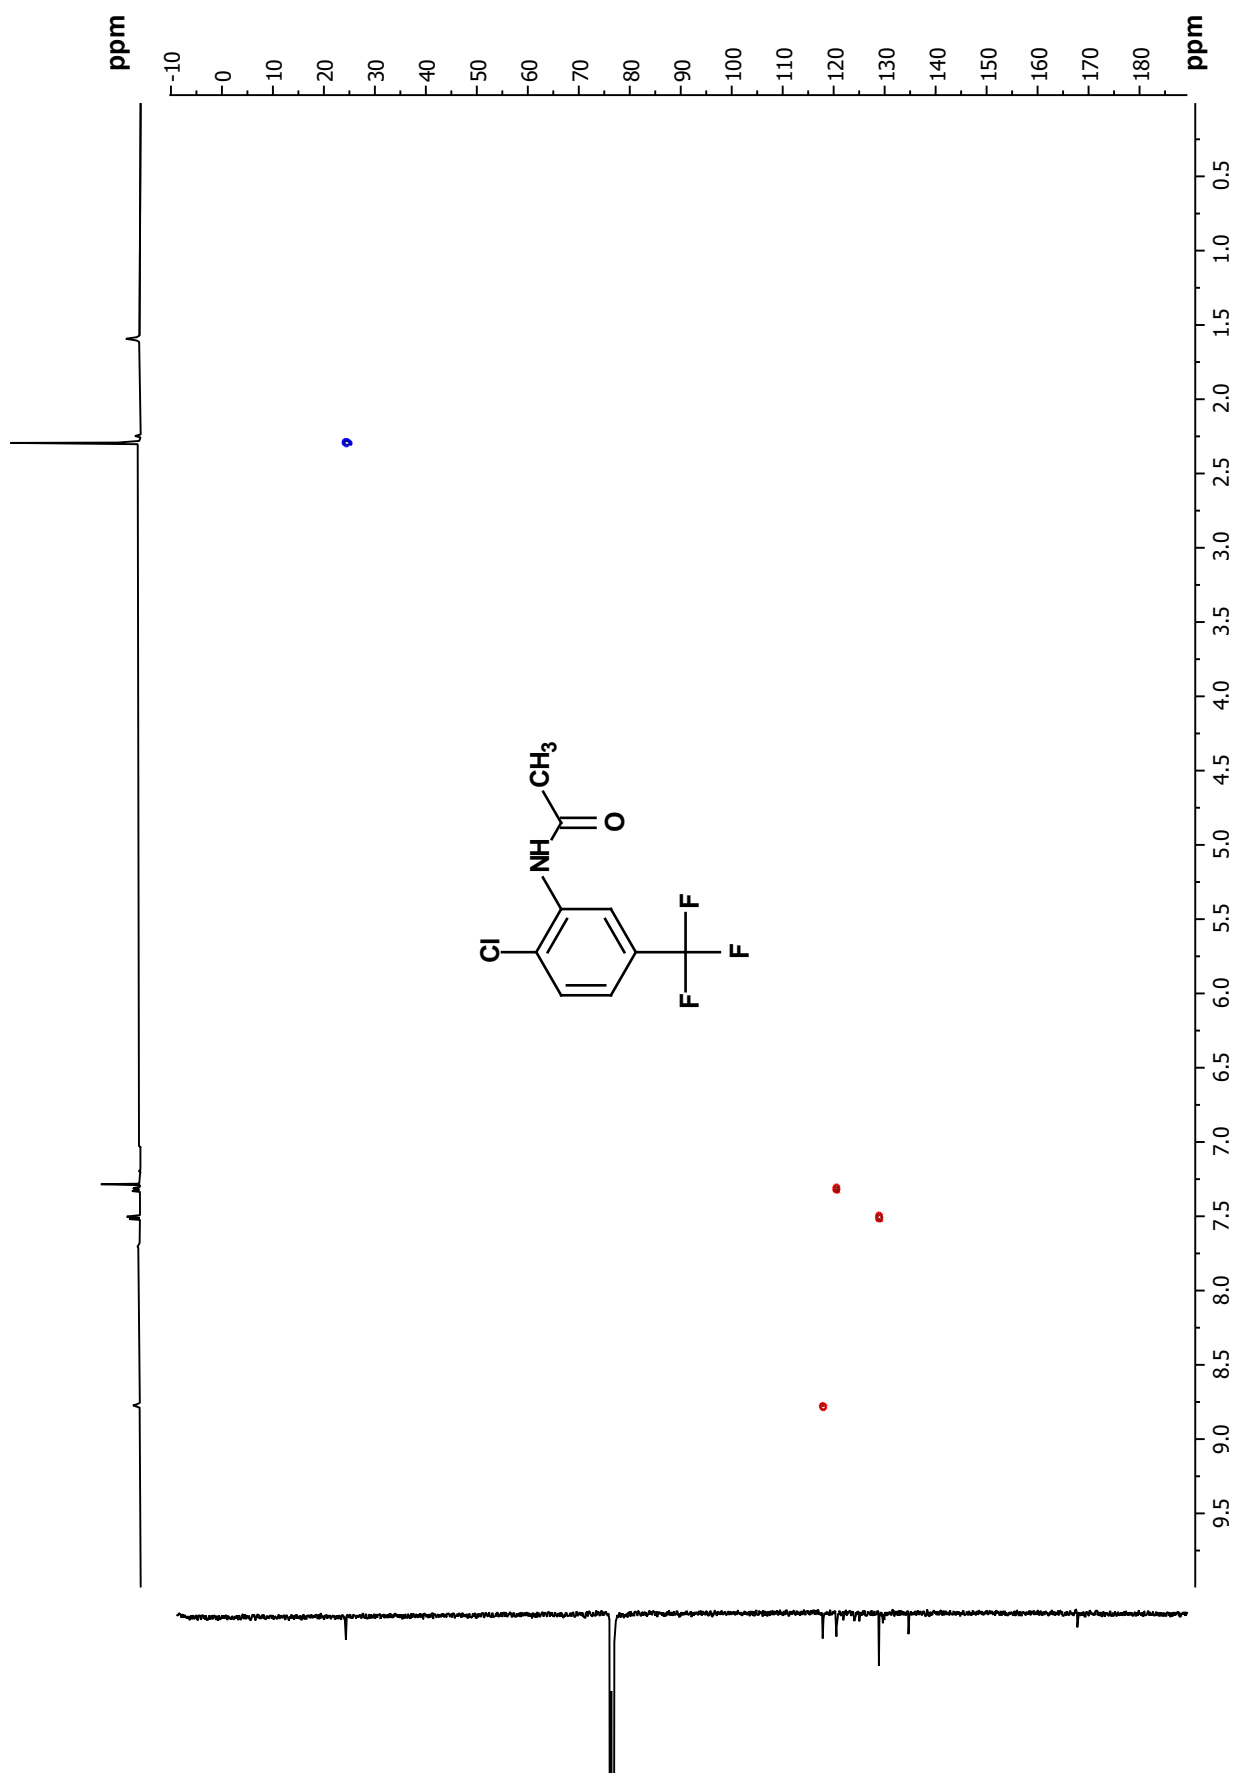

HMBC NMR *N*-(2-chloro-5-(trifluoromethyl)phenyl)acetamide (**2e**)

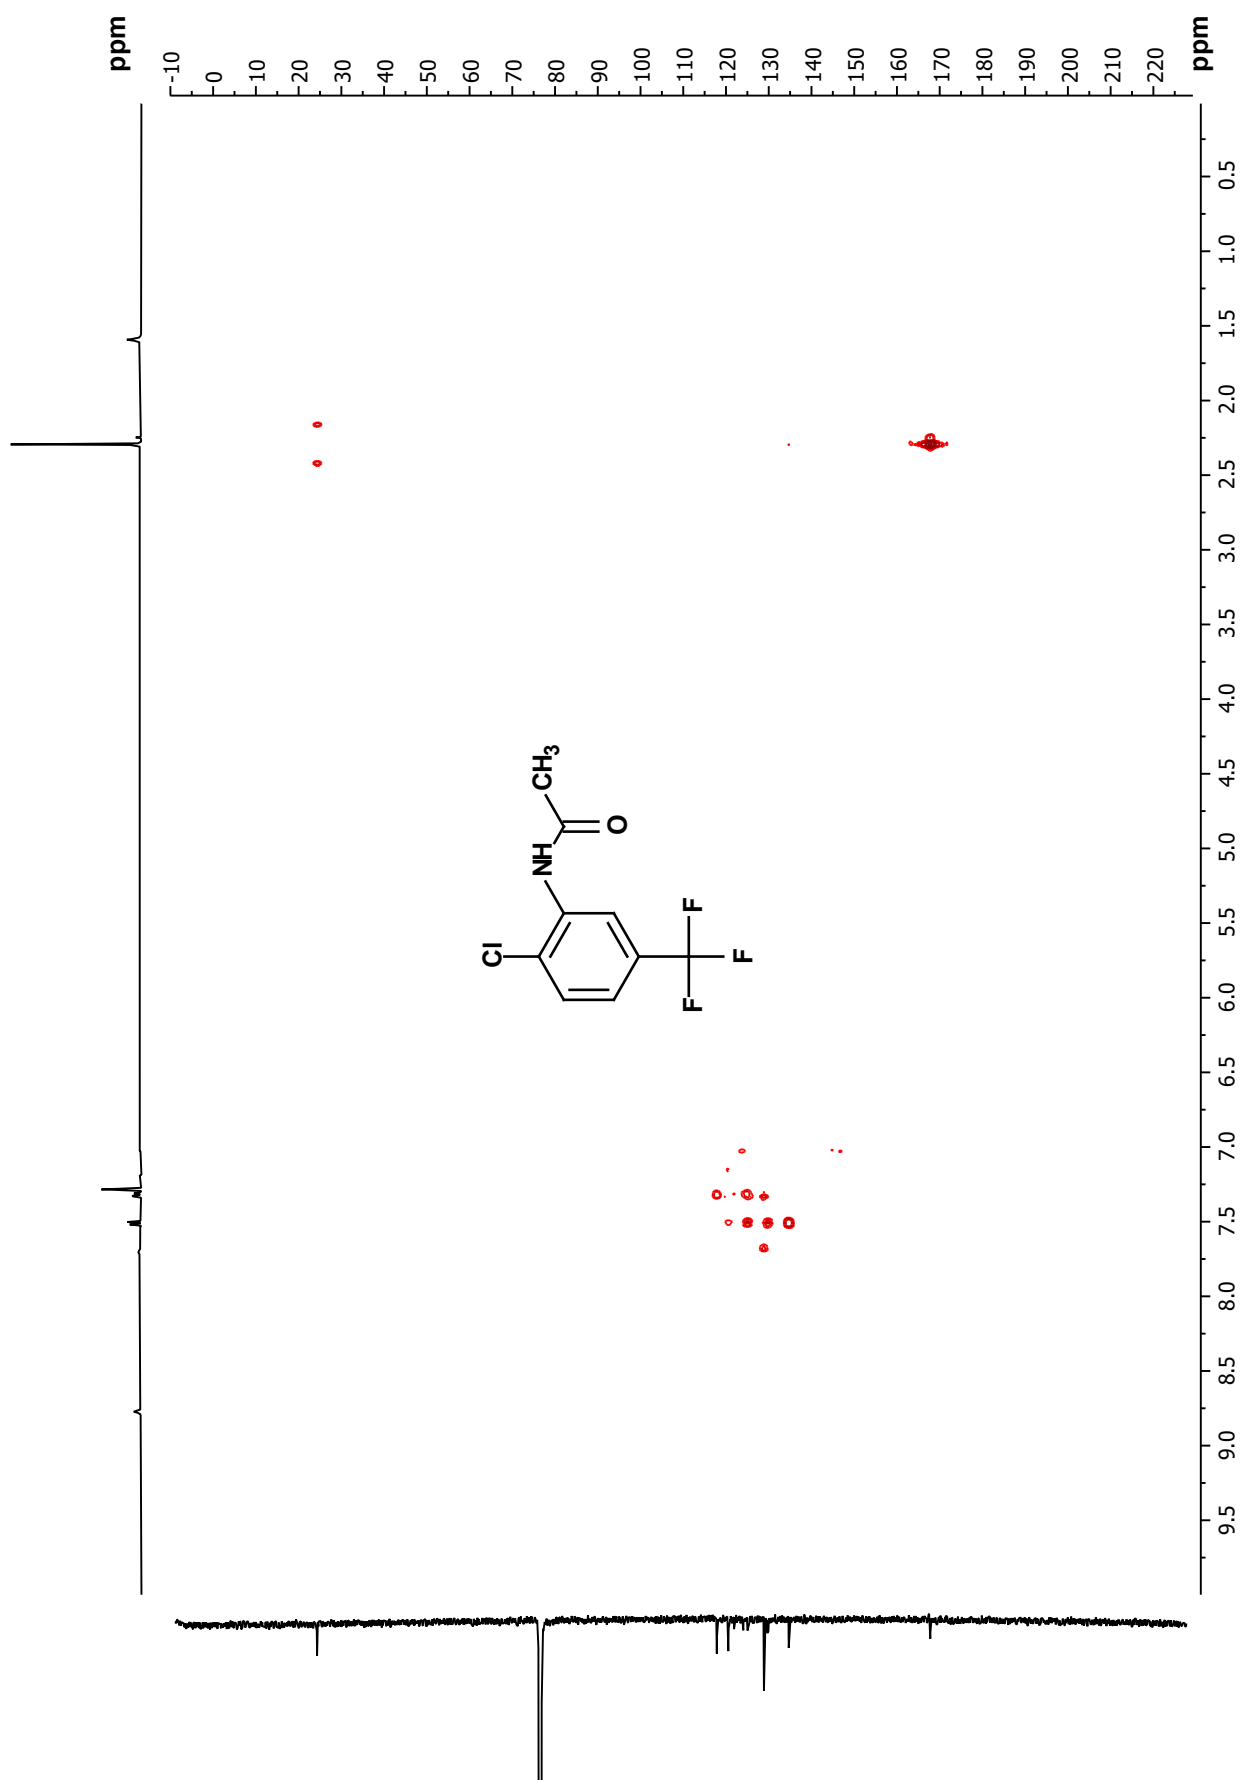

$^1\text{H}$  and  $^{13}\text{C}$  NMR *N*-(4-fluorophenyl)acetamide (**2f**)

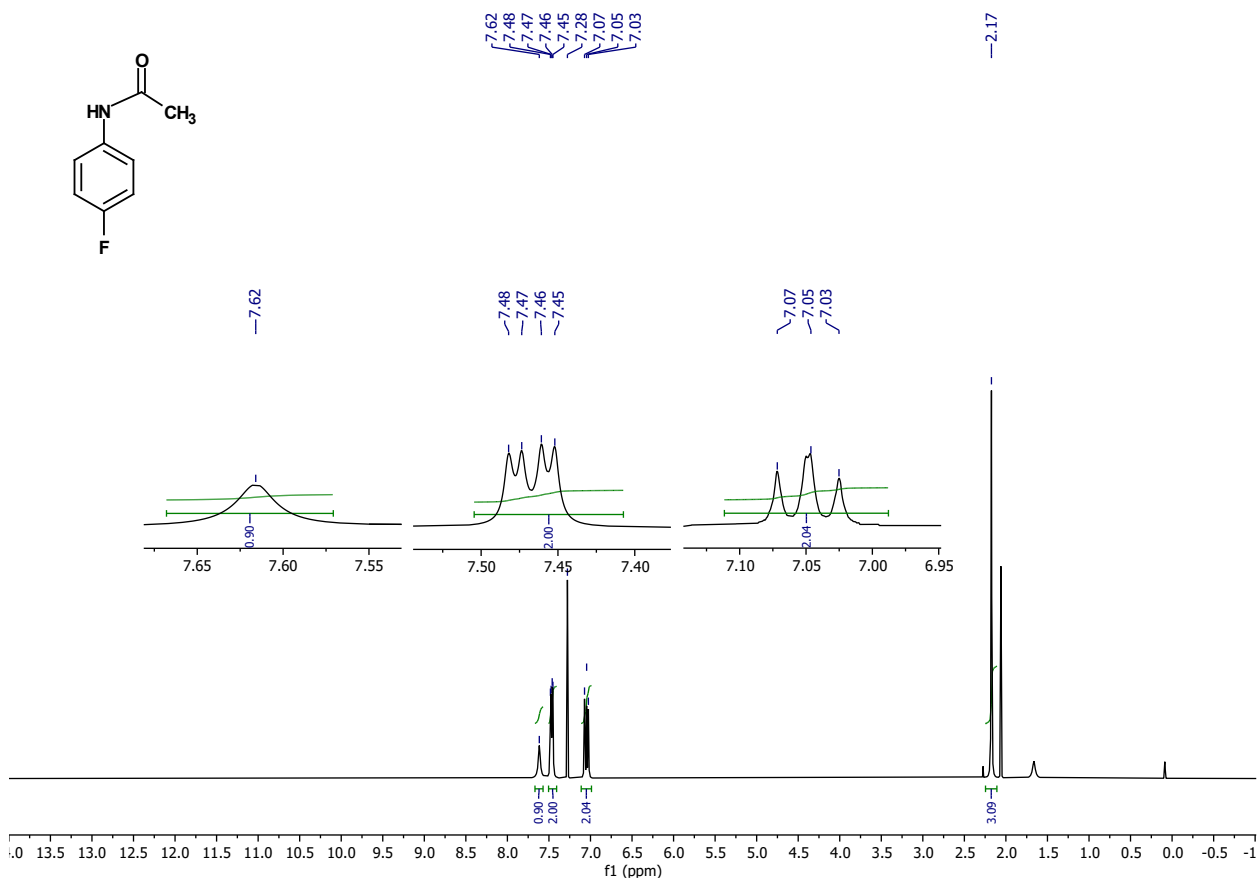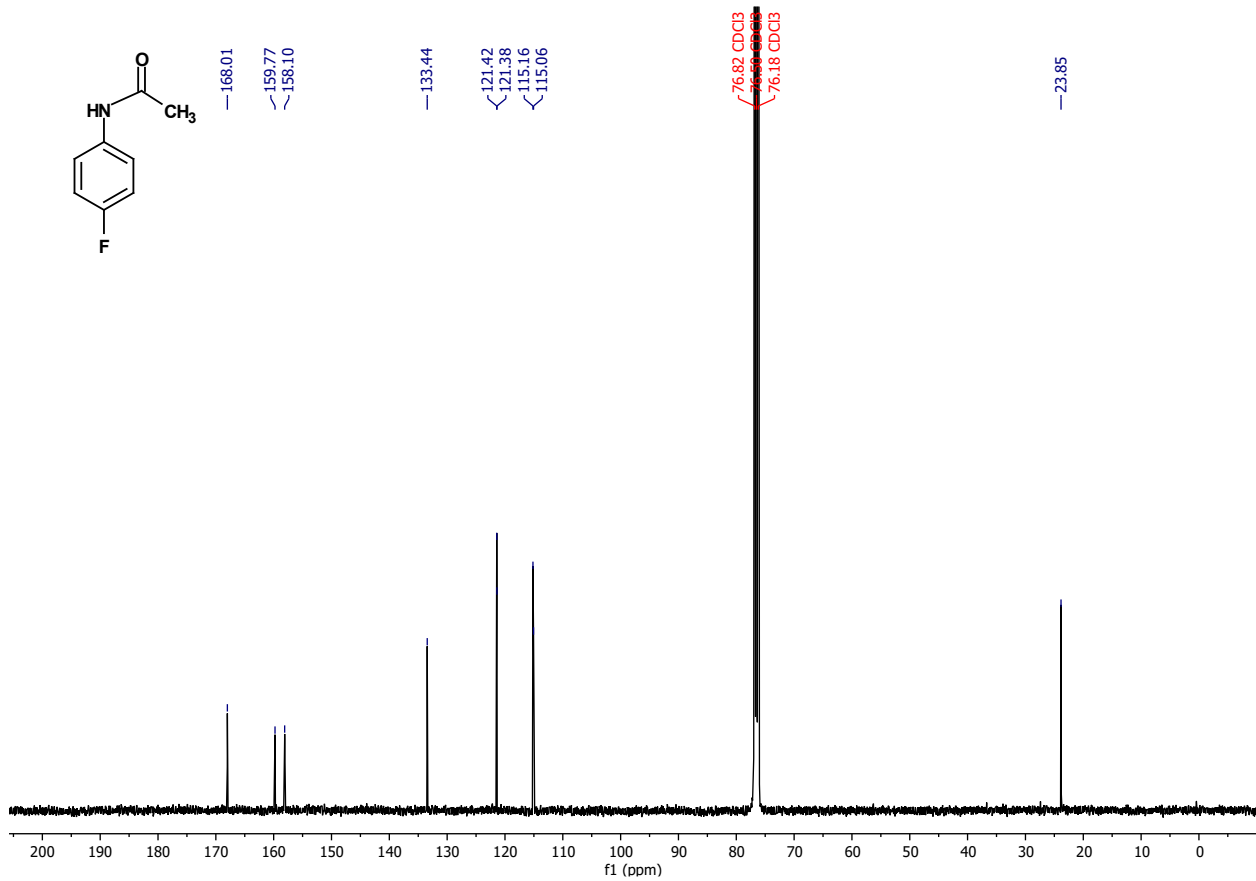

$^{19}\text{F}$  NMR *N*-(4-fluorophenyl)acetamide (**2f**)

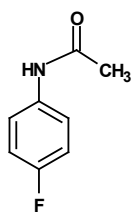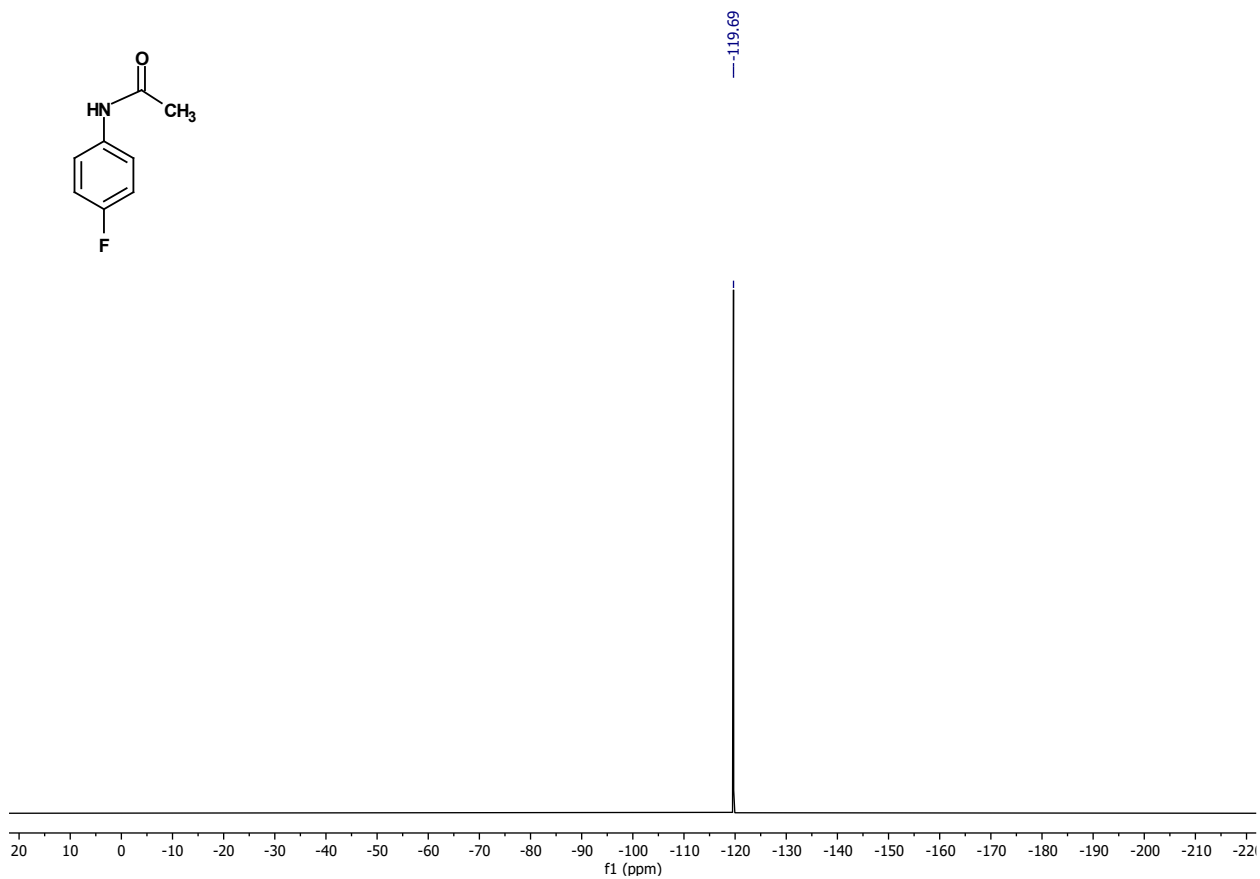

$^1\text{H}$  and  $^{13}\text{C}$  NMR *N*-(4-chlorophenyl)acetamide (2g)

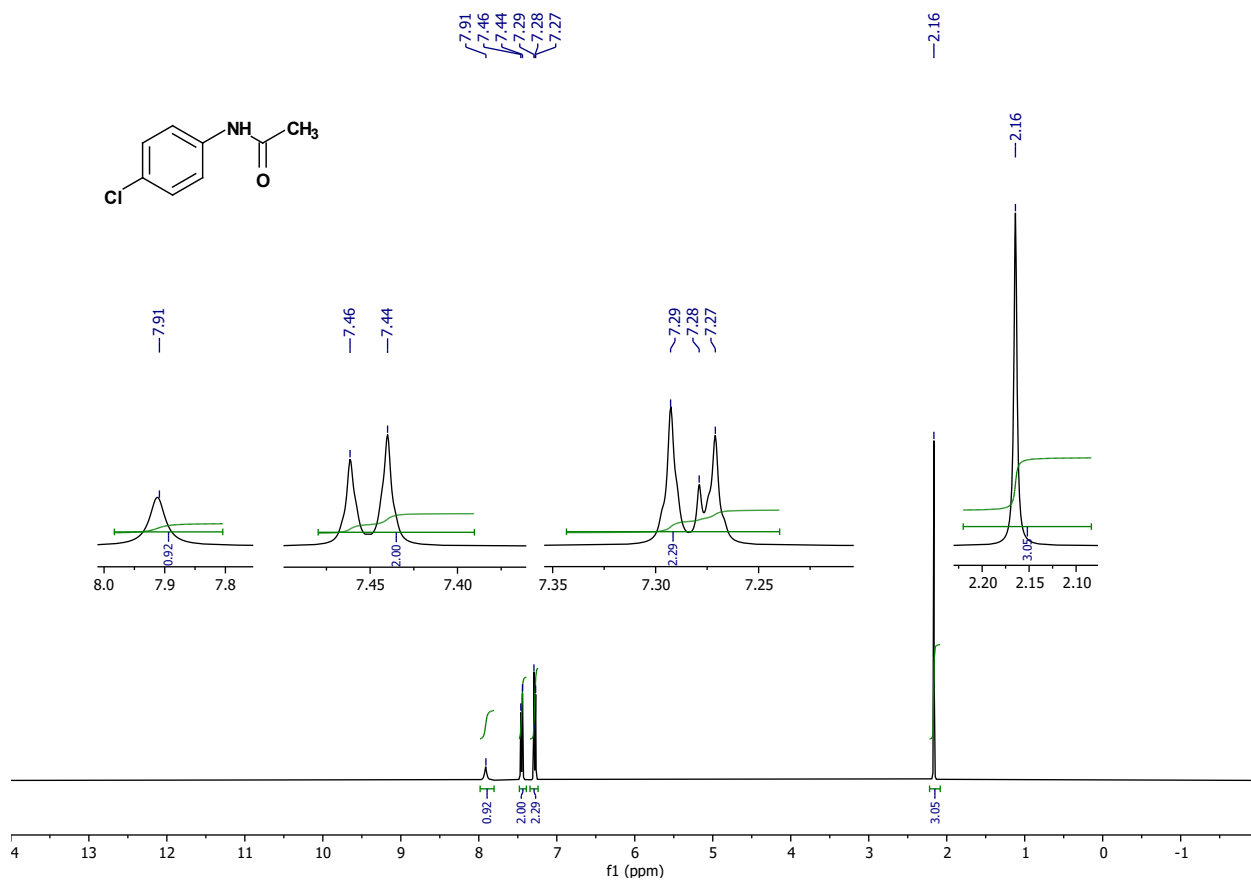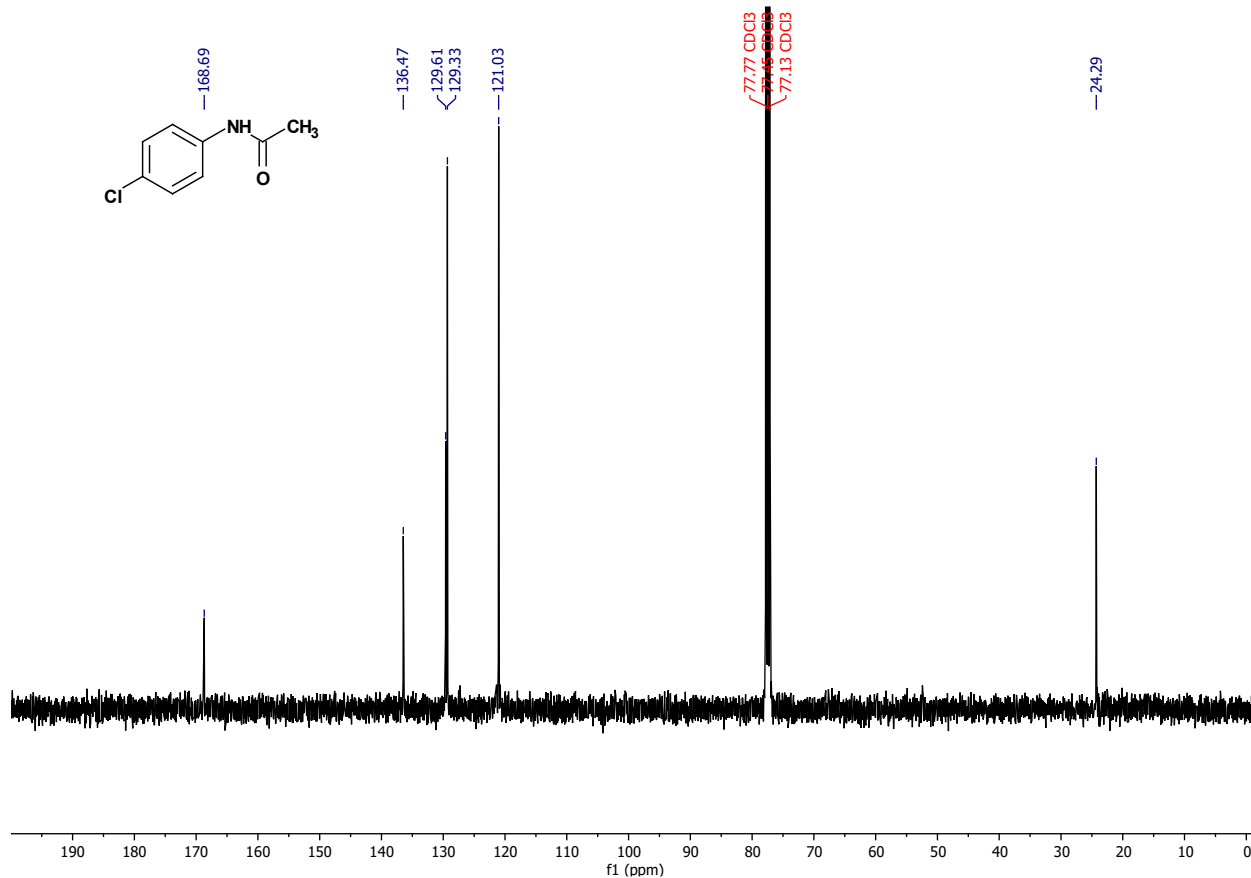

$^1\text{H}$  and  $^{13}\text{C}$  NMR *N*-(3,4-dichlorophenyl)acetamide (**2h-a**)

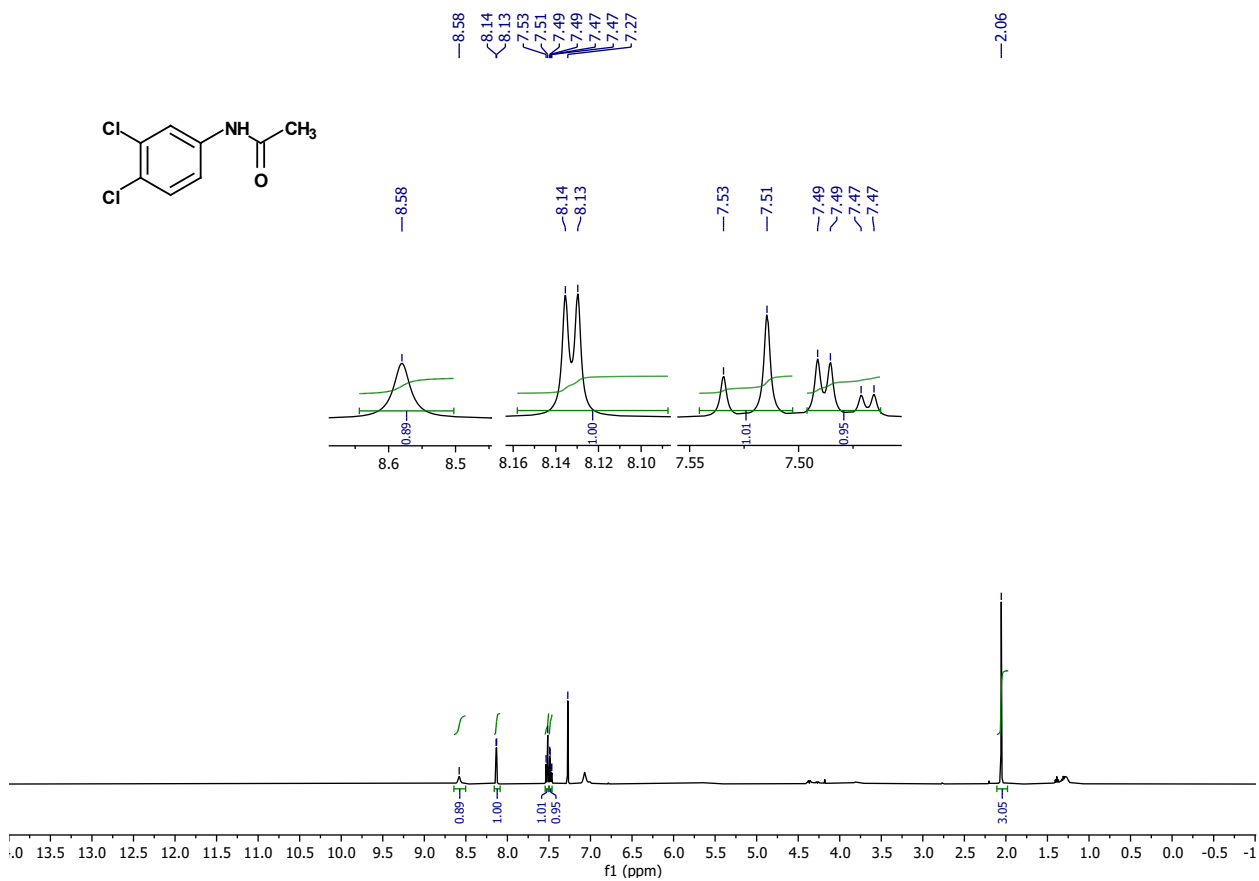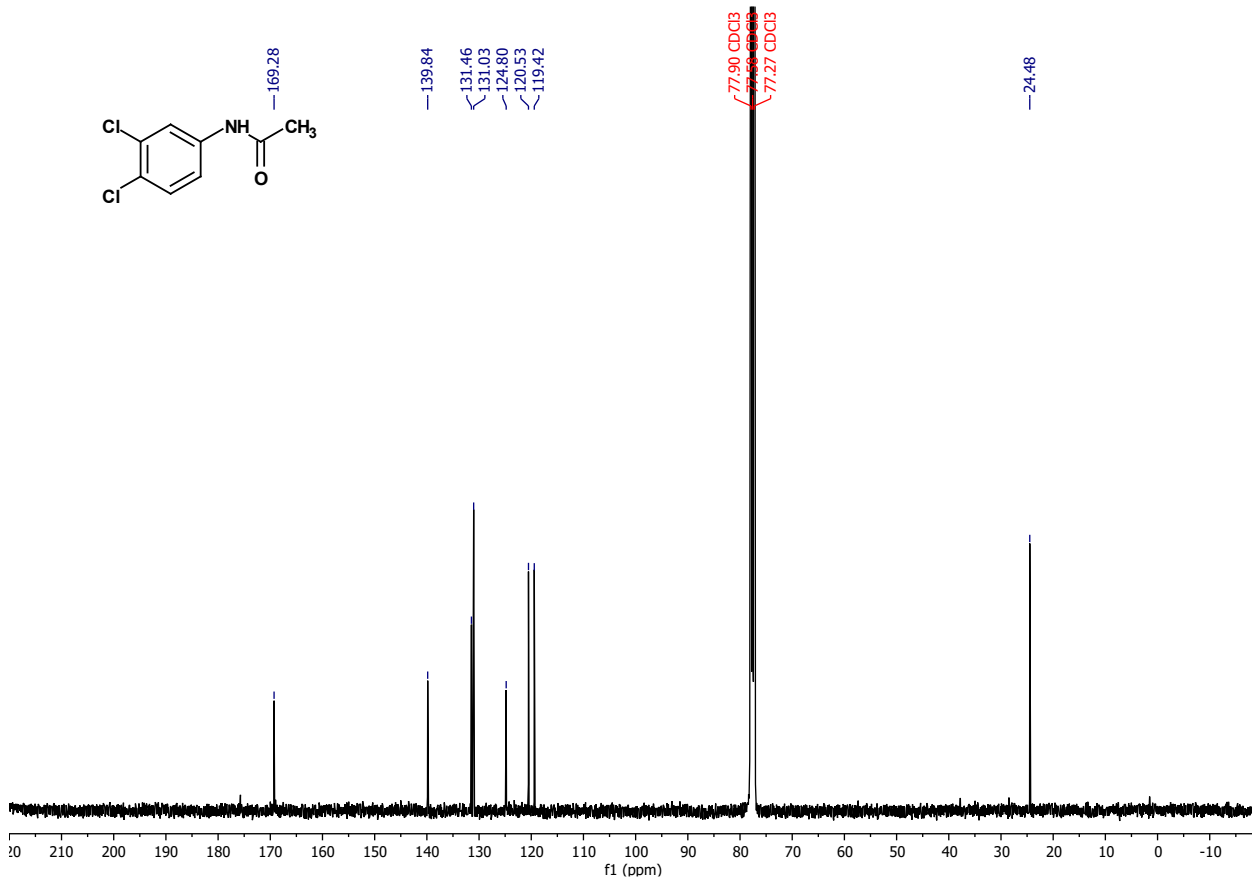

$^1\text{H}$  and  $^{13}\text{C}$  NMR *N*-(2,3-dichlorophenyl)acetamide (**2h-b**)

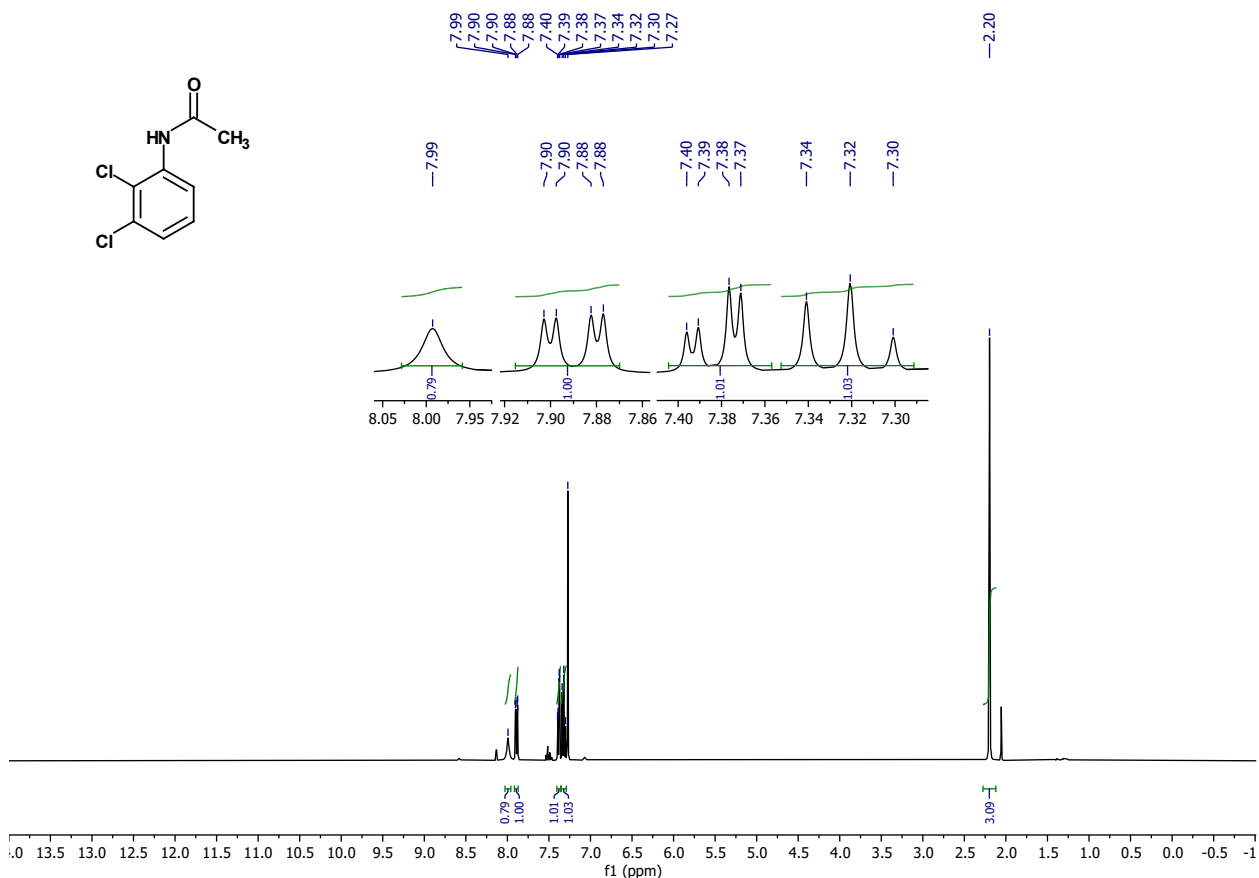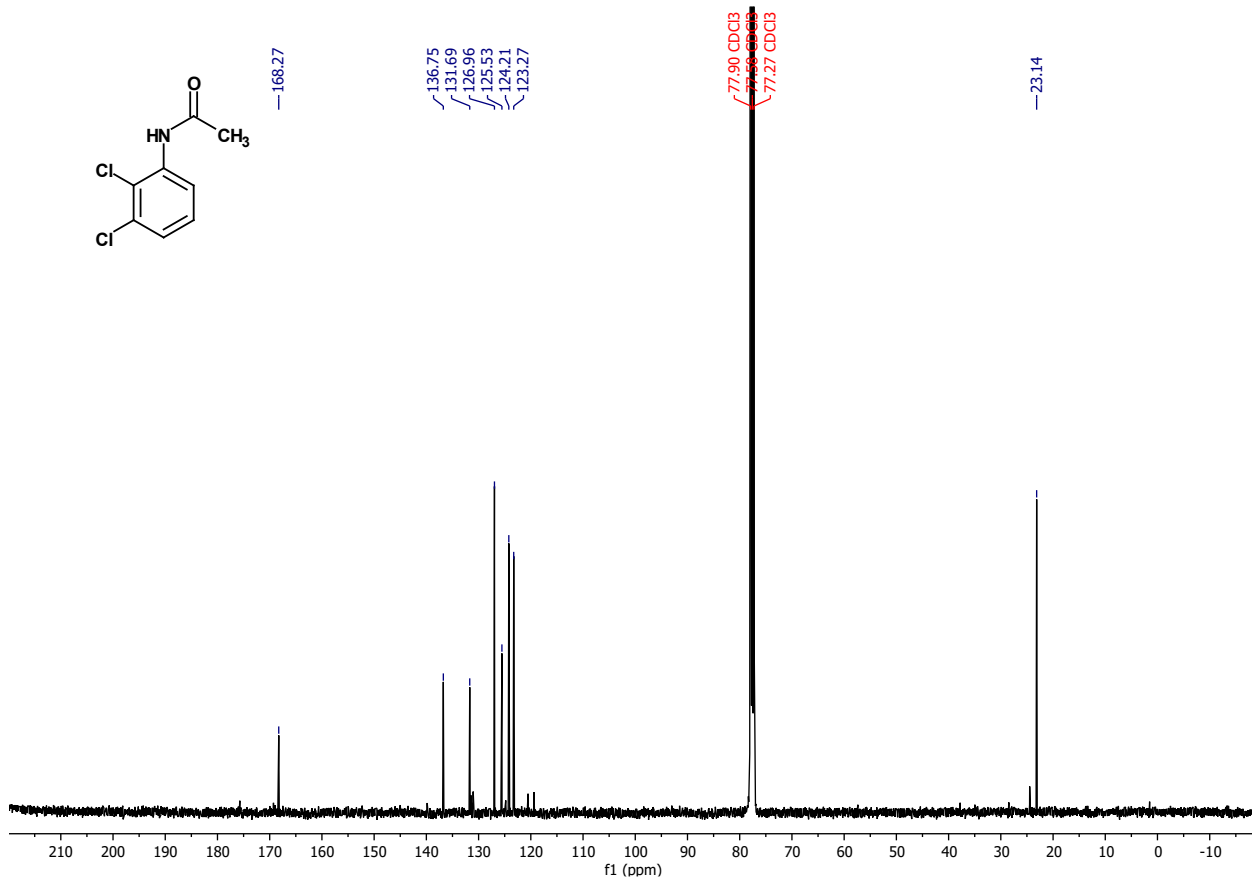



$^1\text{H}$  and  $^{13}\text{C}$  NMR *N*-(5-chloro-2-hydroxyphenyl)acetamide (**2i**)

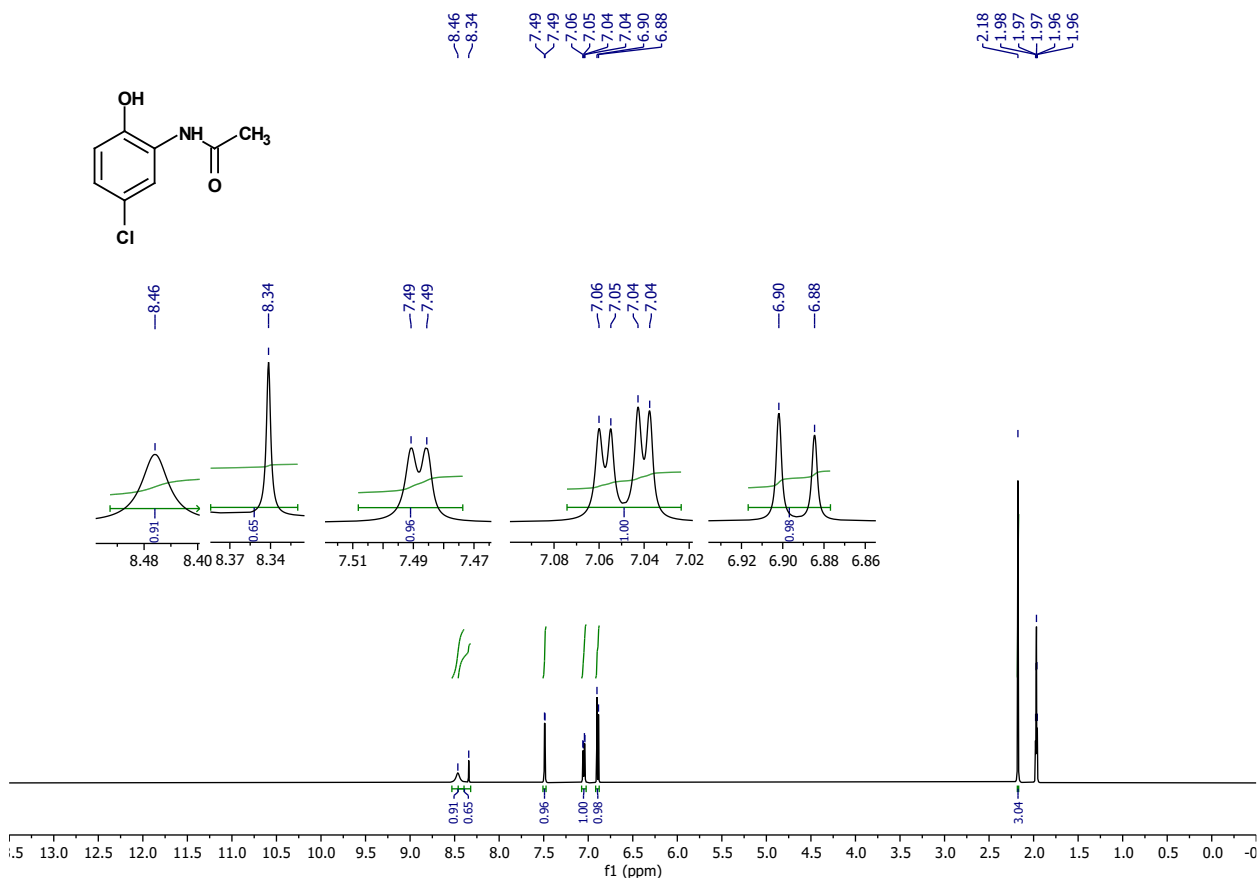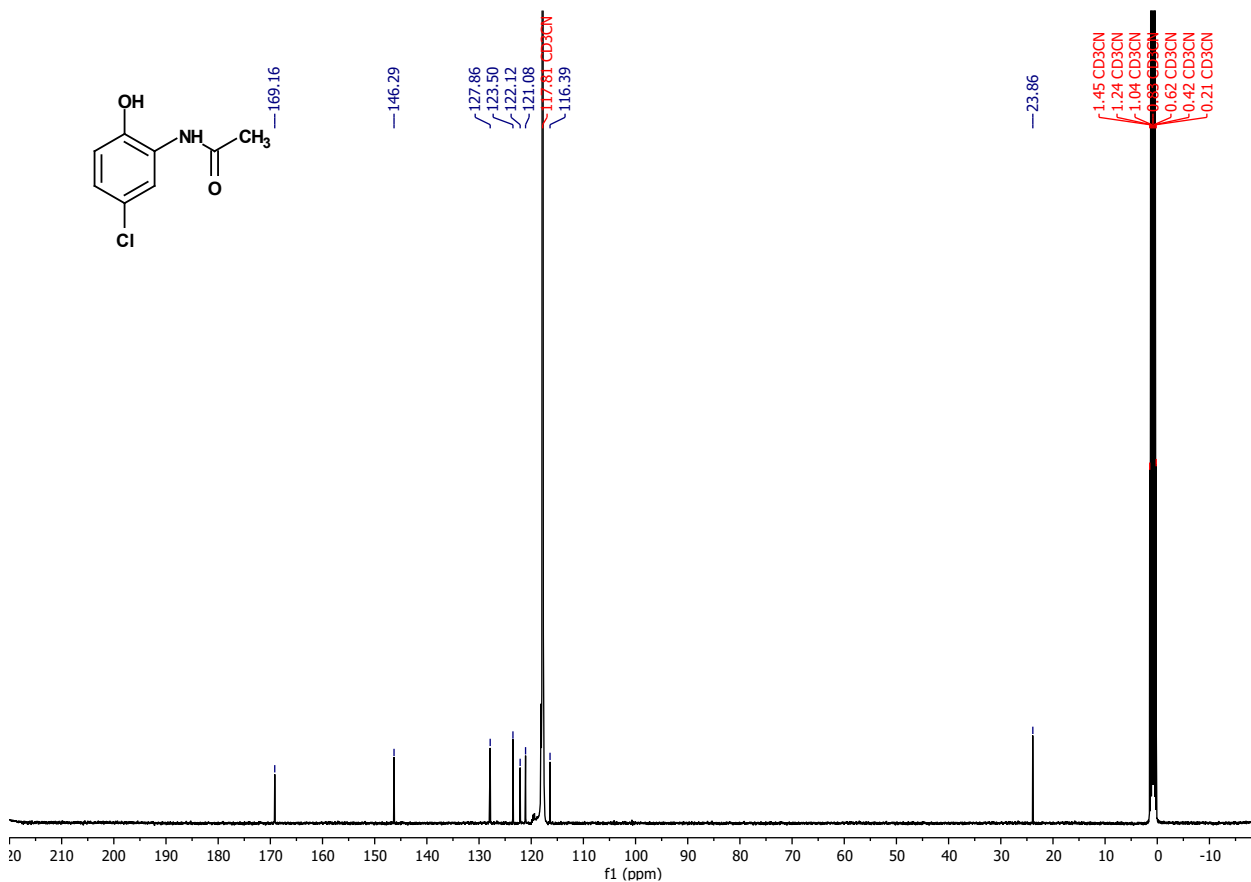

$^1\text{H}$  and  $^{13}\text{C}$  NMR 5-chloro-2-methylbenzo[d]oxazole (**2ii**)

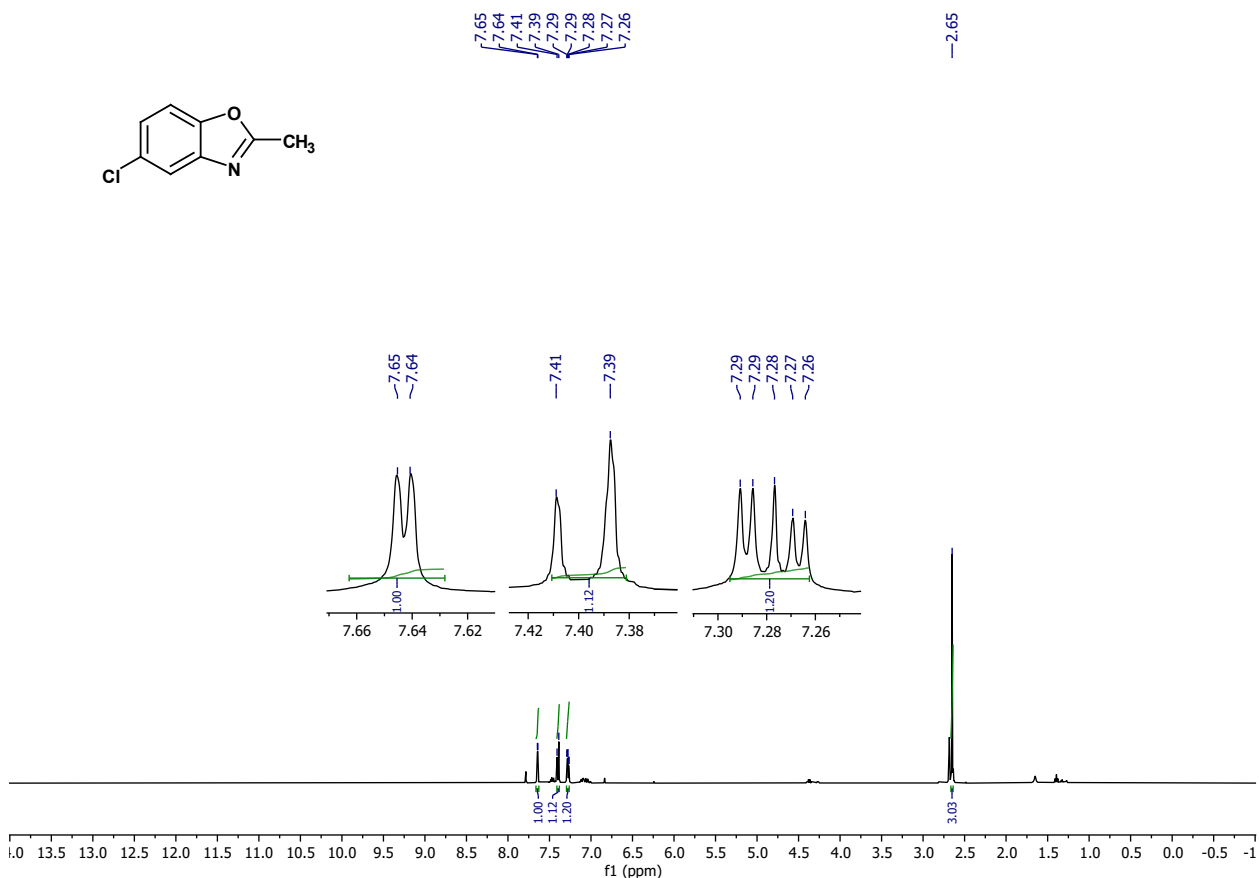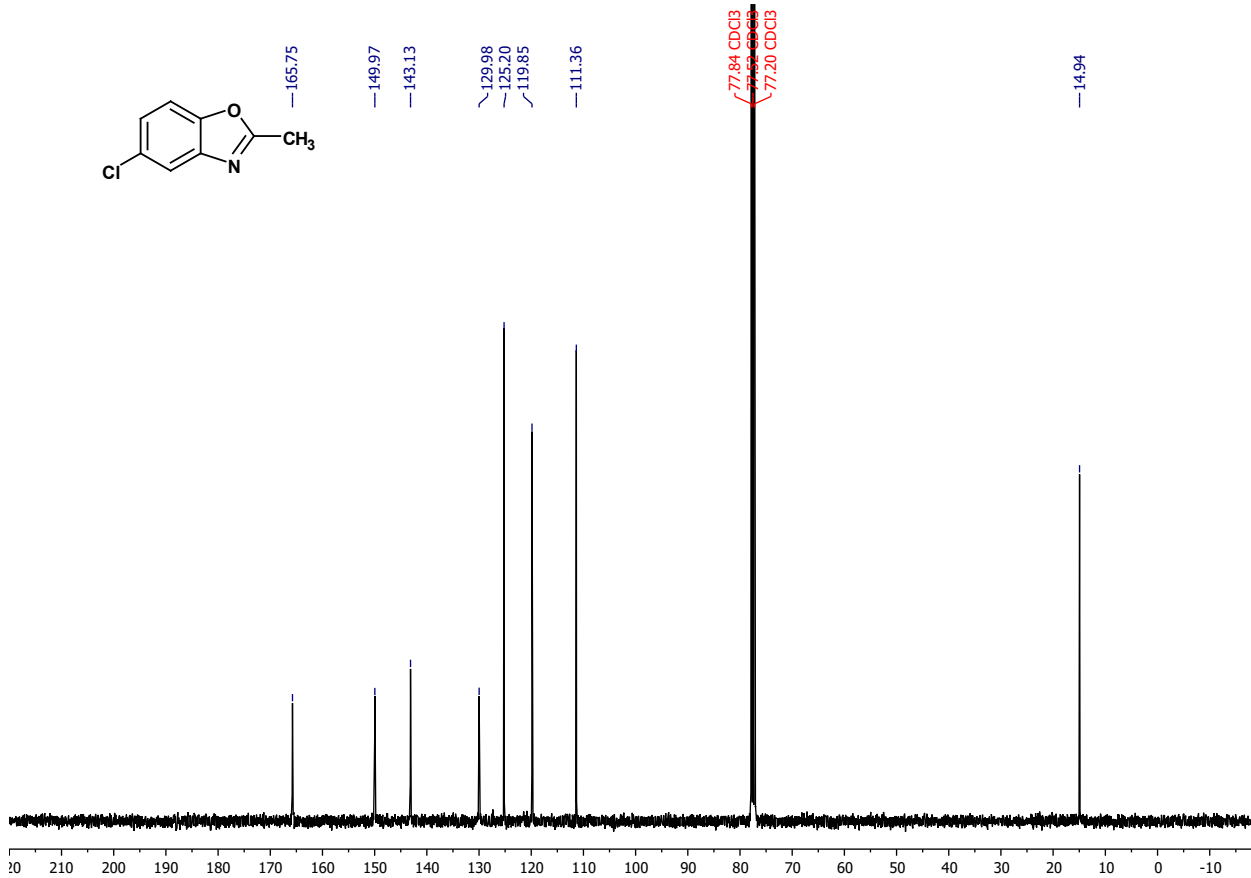

$^1\text{H}$  and  $^{13}\text{C}$  NMR *N*-(5-bromo-2-hydroxyphenyl)acetamide (**2j**)

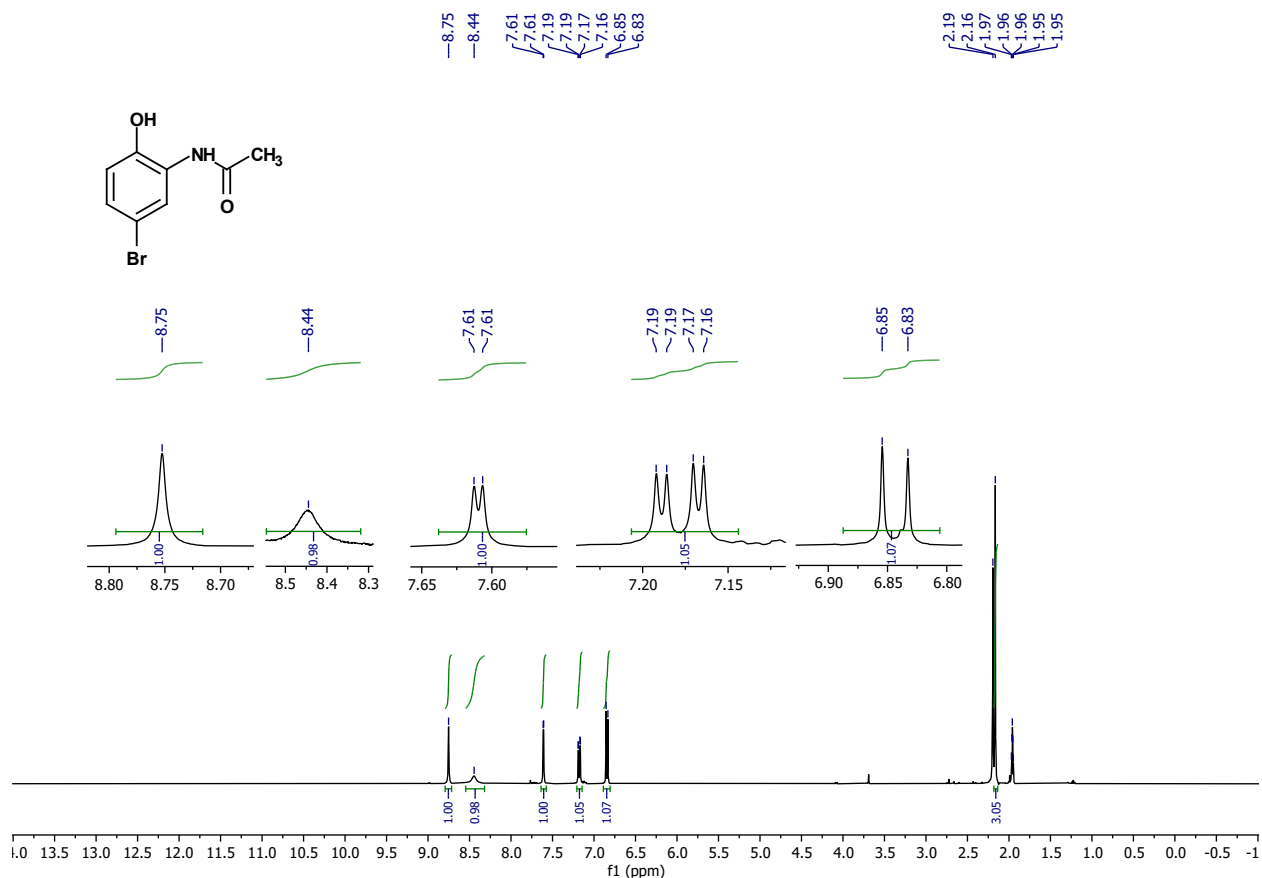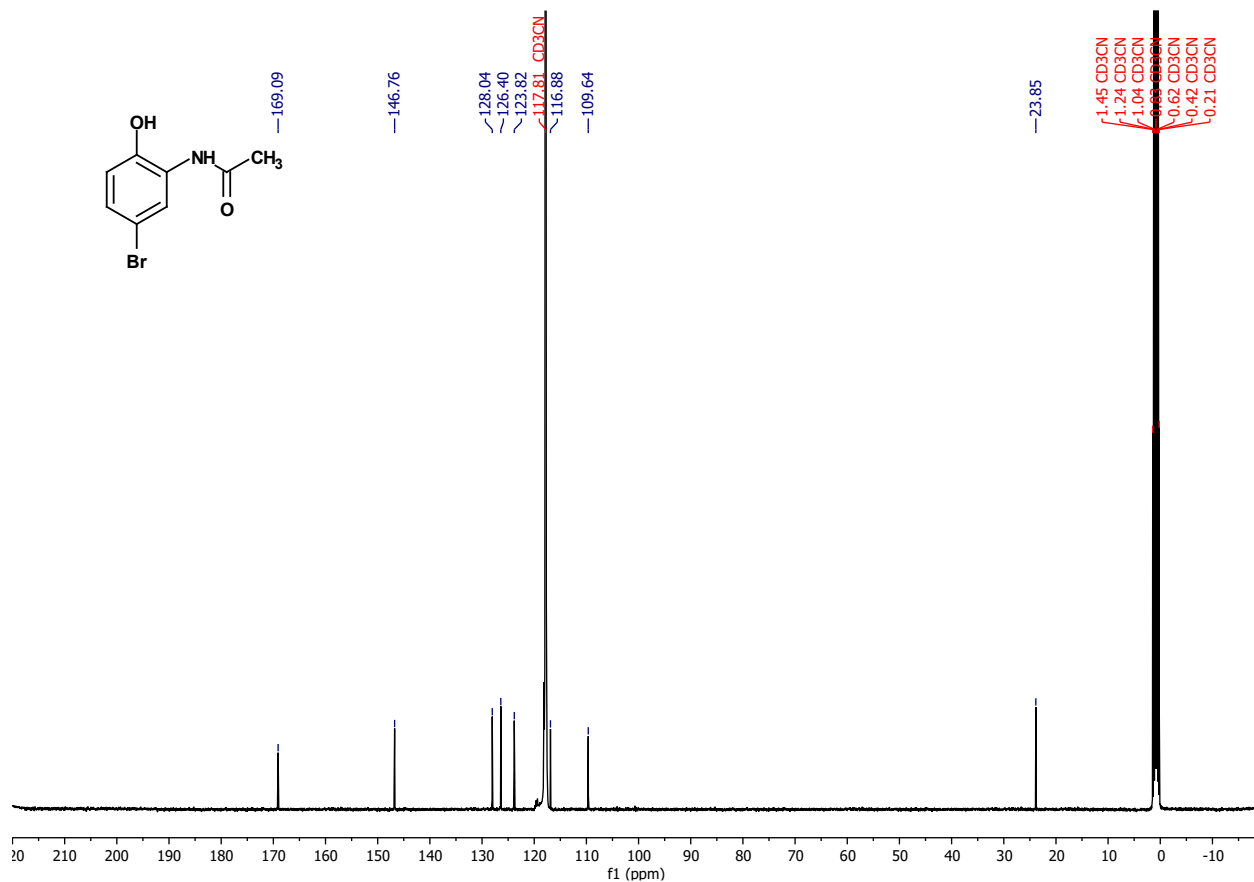

$^1\text{H}$  and  $^{13}\text{C}$  NMR 5-bromo-2-methylbenzo[d]oxazole (**2jj**)

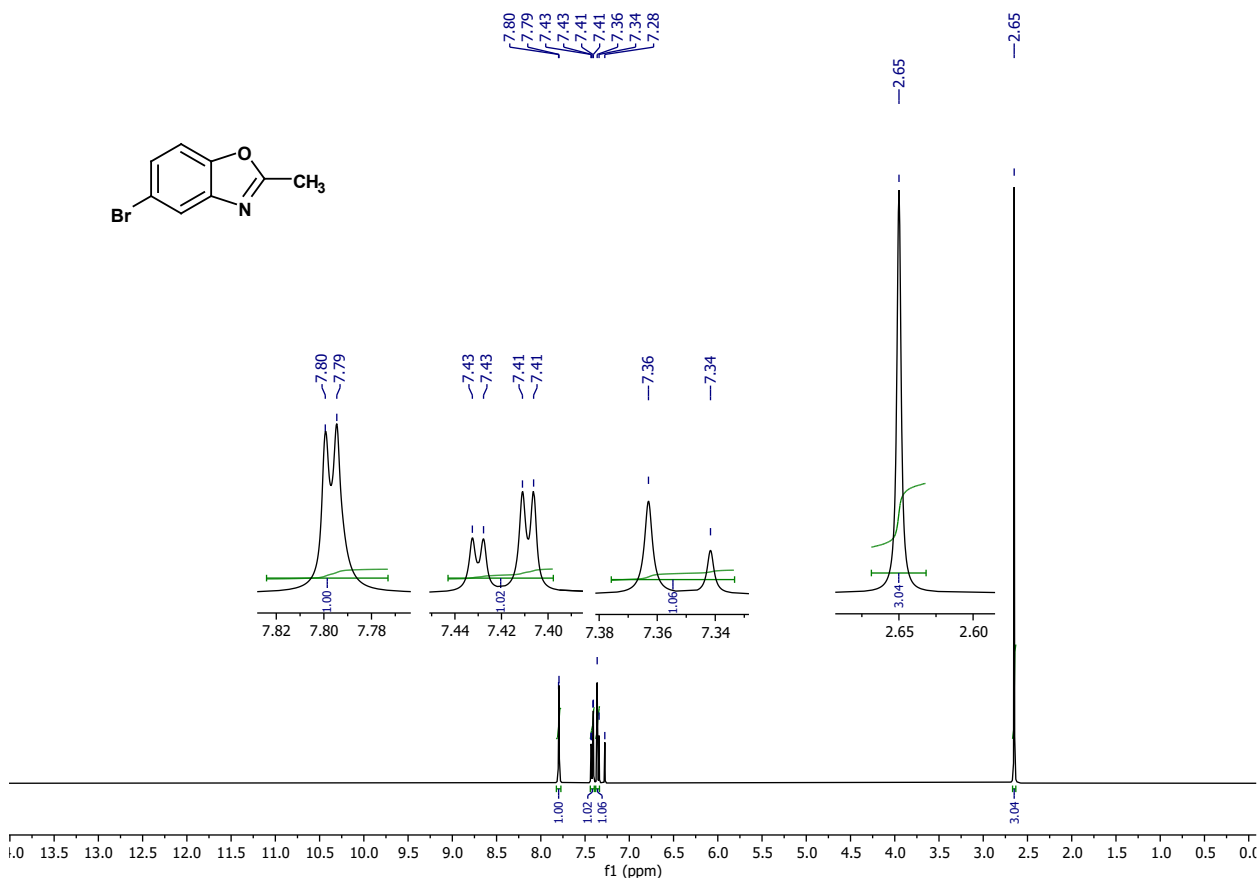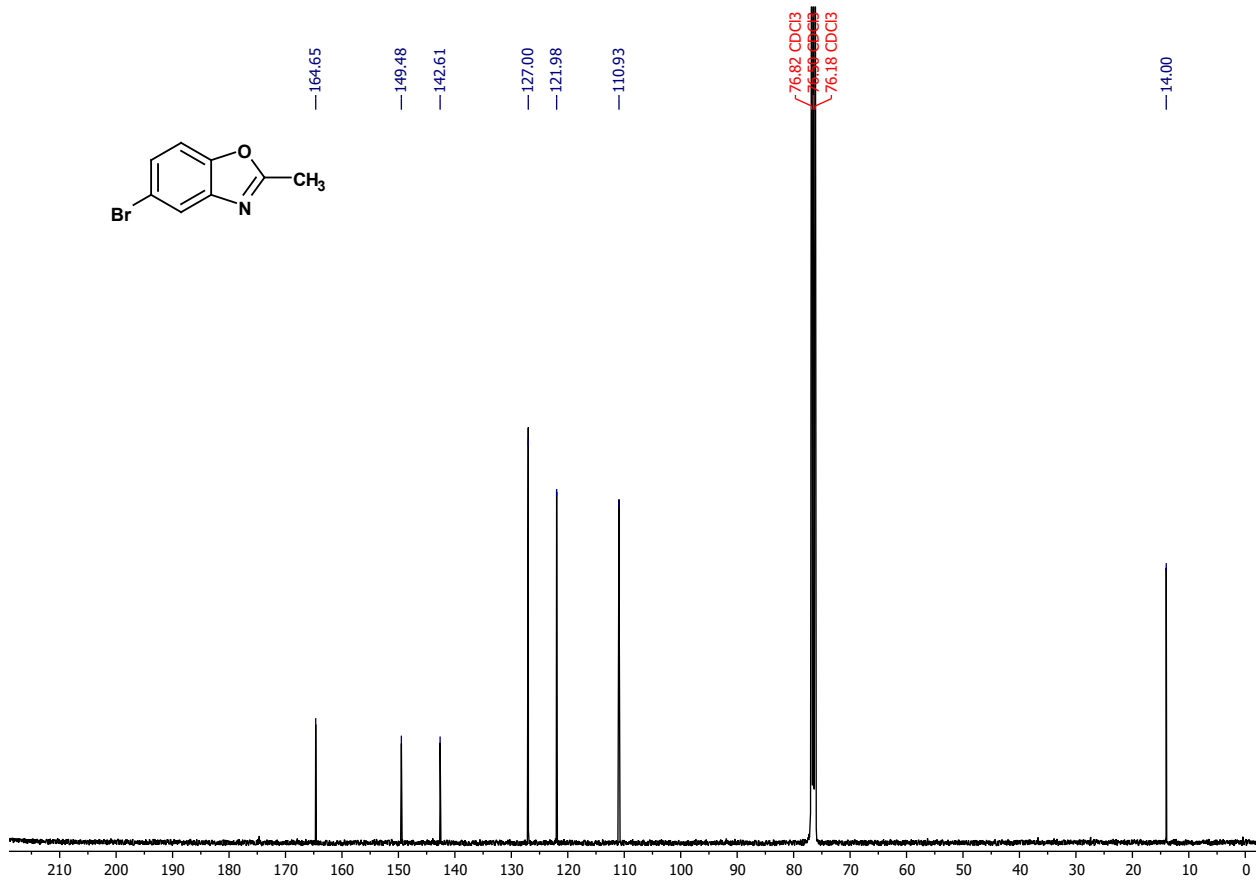

**COSY** NMR 5-bromo-2-methylbenzo[d]oxazole (**2jj**)

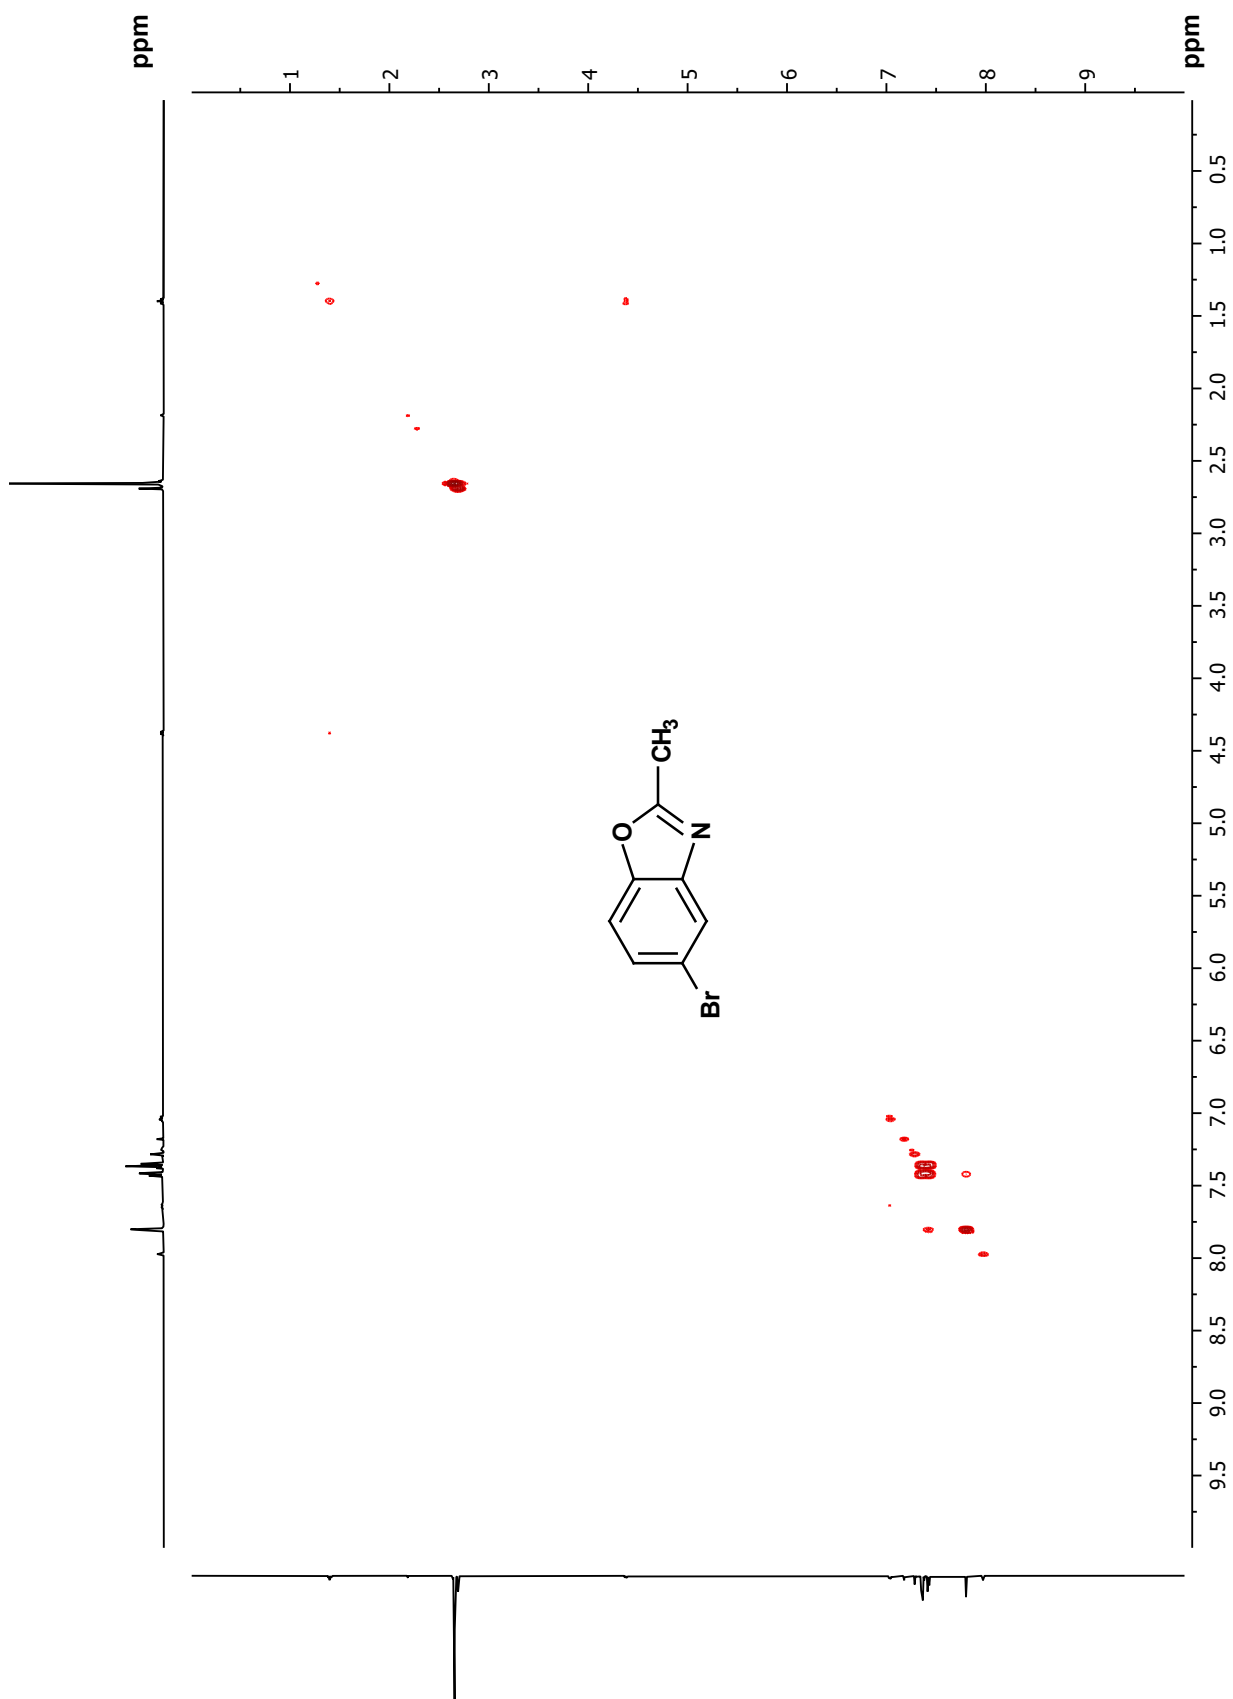

HSQC NMR 5-bromo-2-methylbenzo[d]oxazole (2jj)

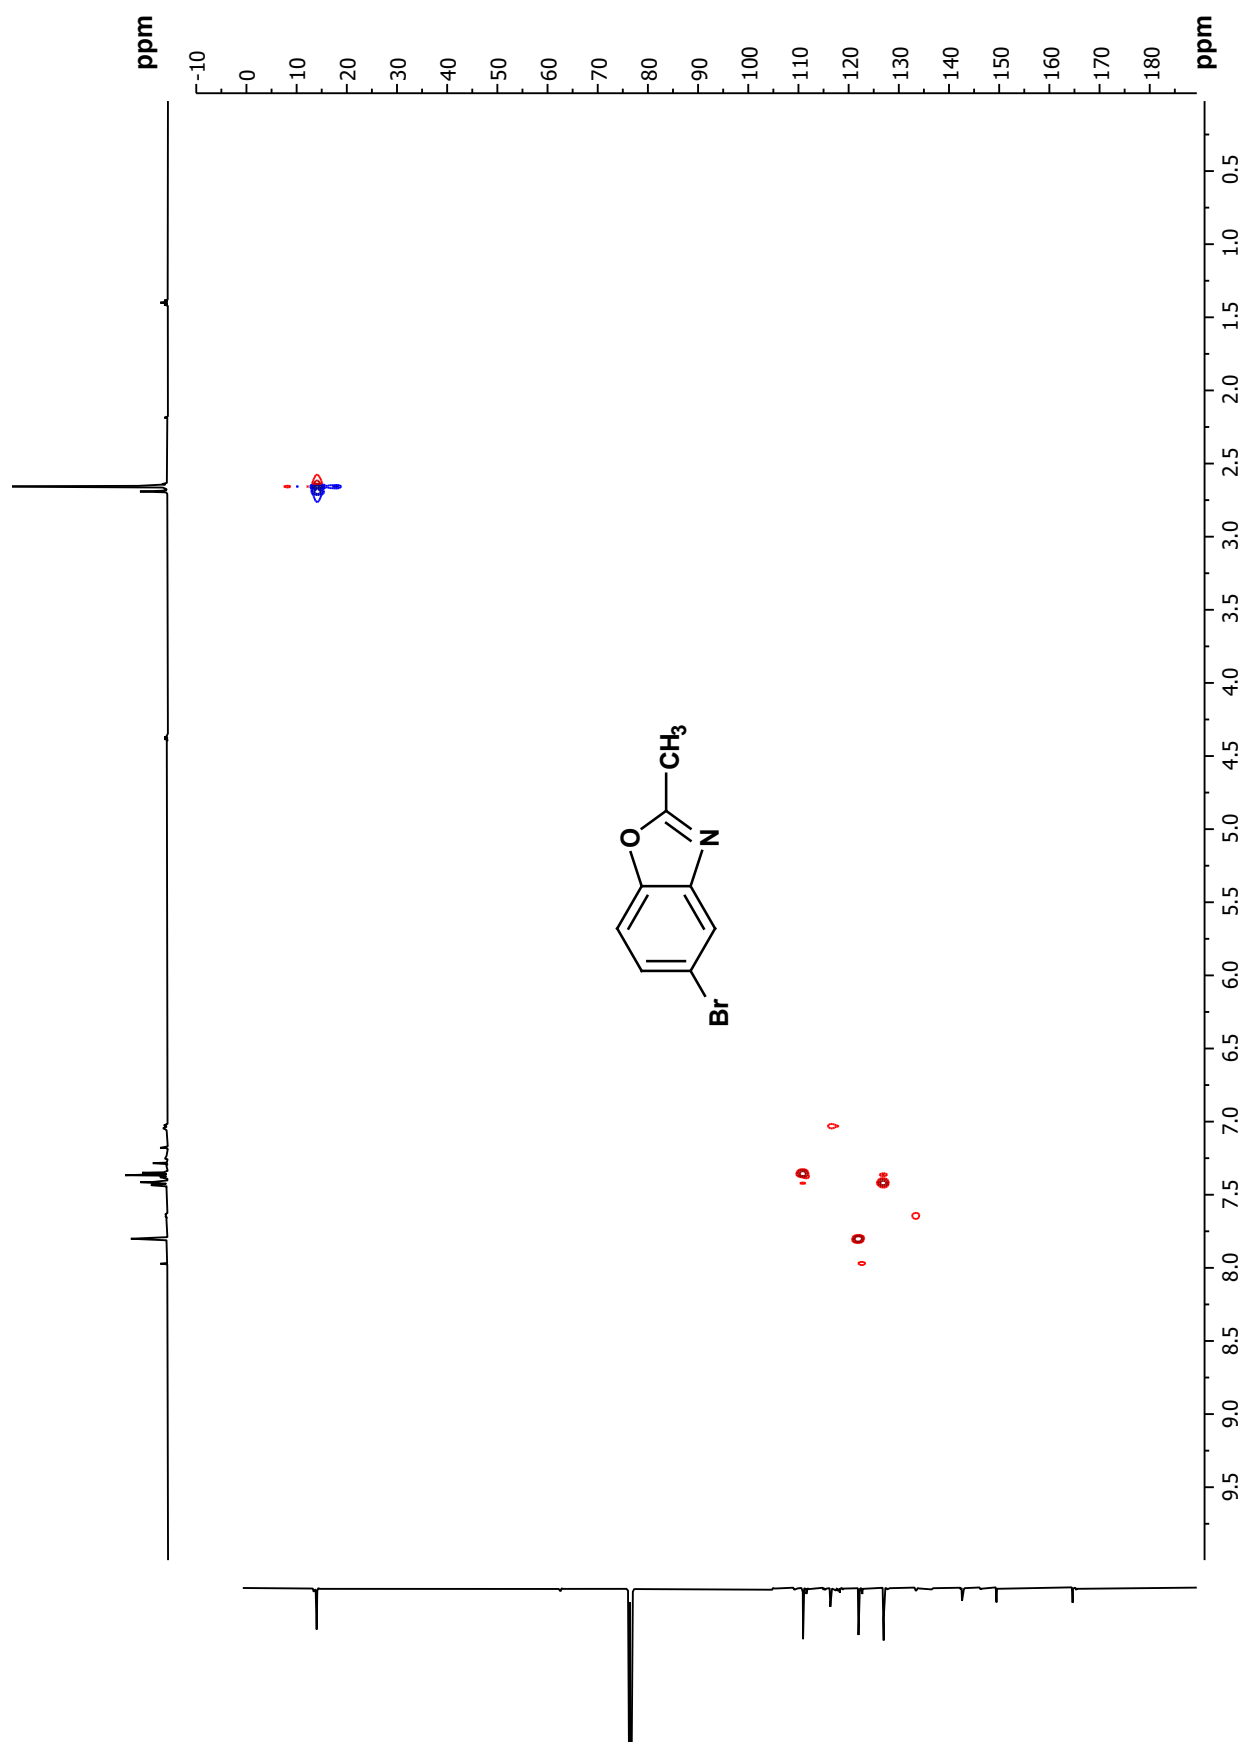

HMBC NMR 5-bromo-2-methylbenzo[d]oxazole (2jj)

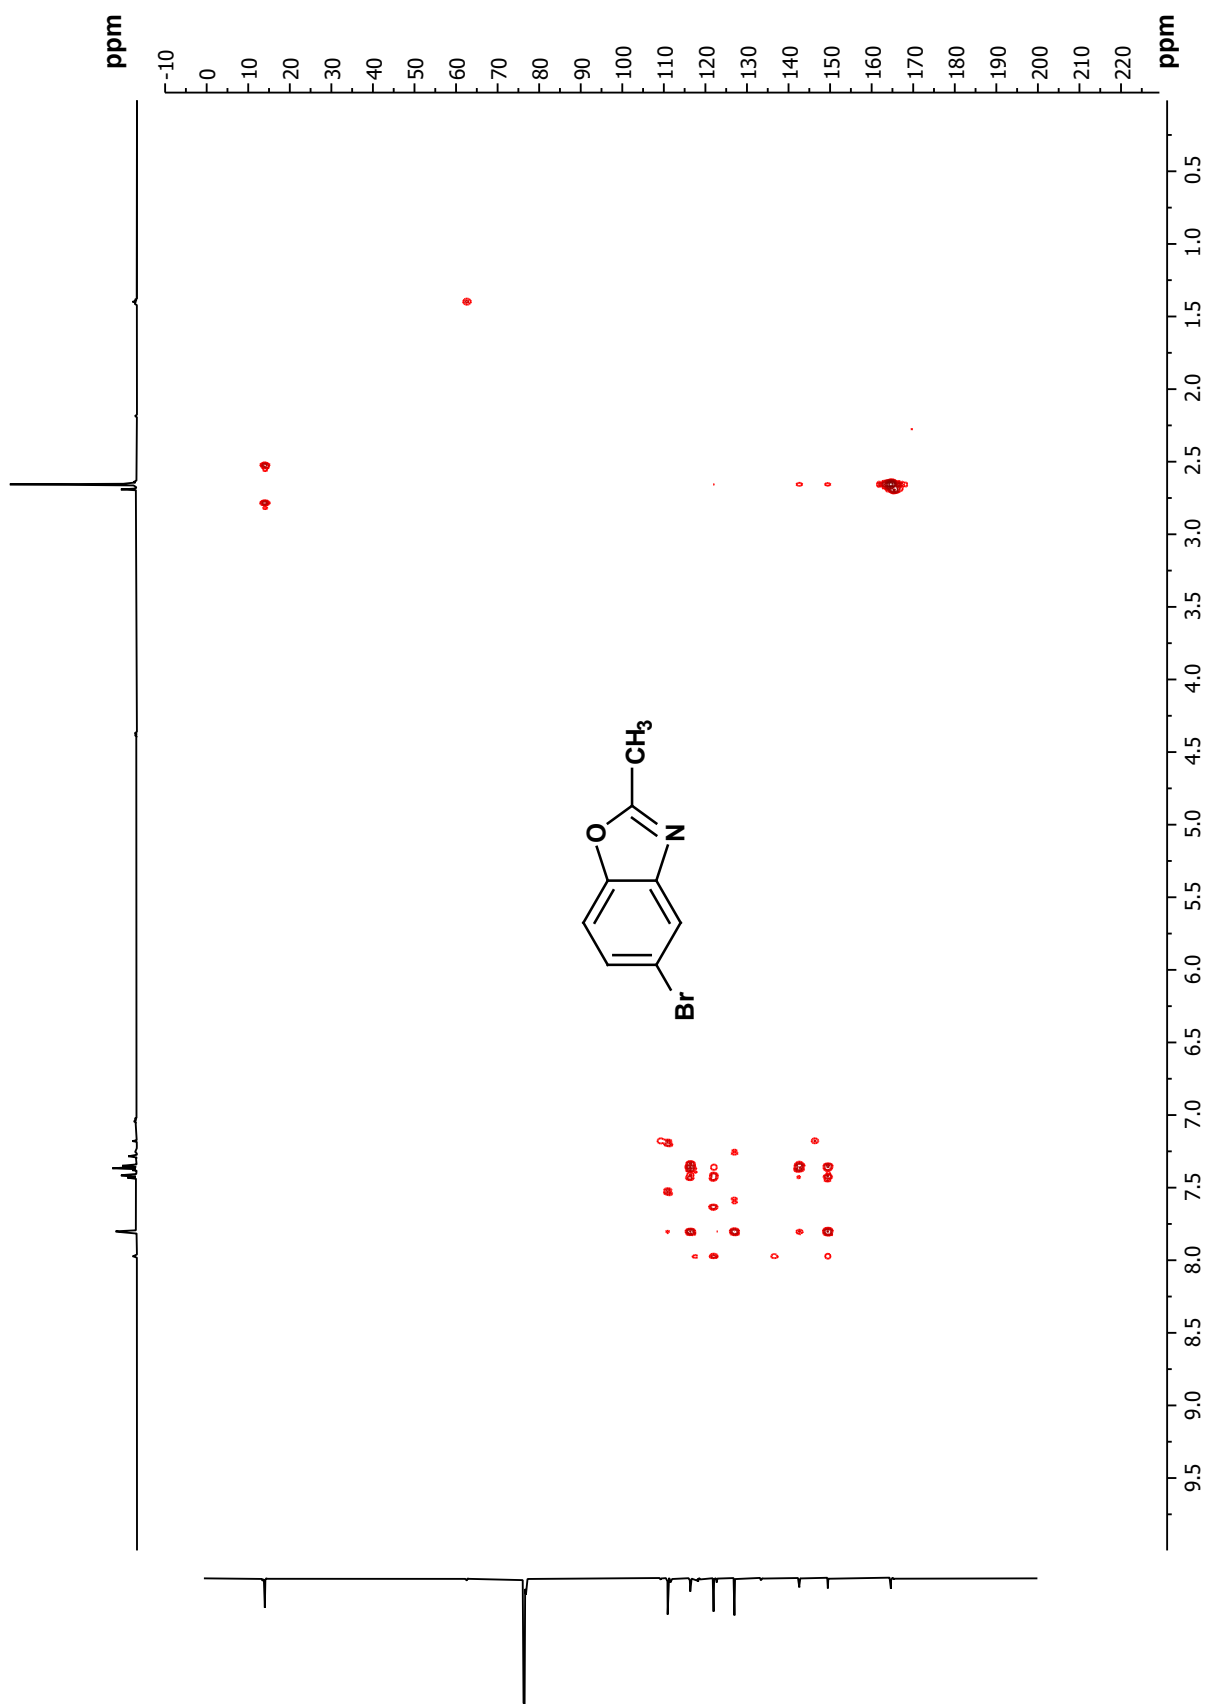

$^1\text{H}$  and  $^{13}\text{C}$  NMR *N*-phenylacetamide (**2k**)

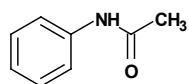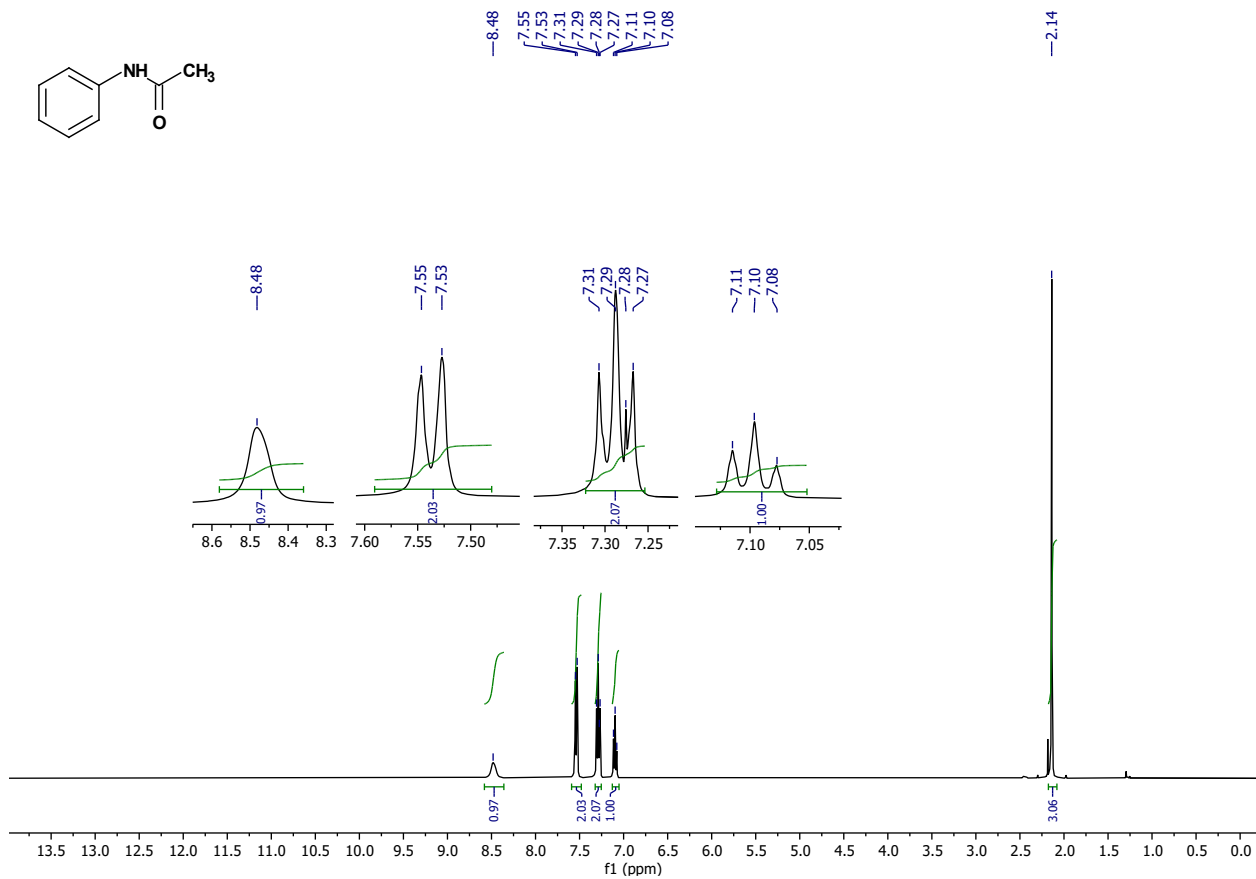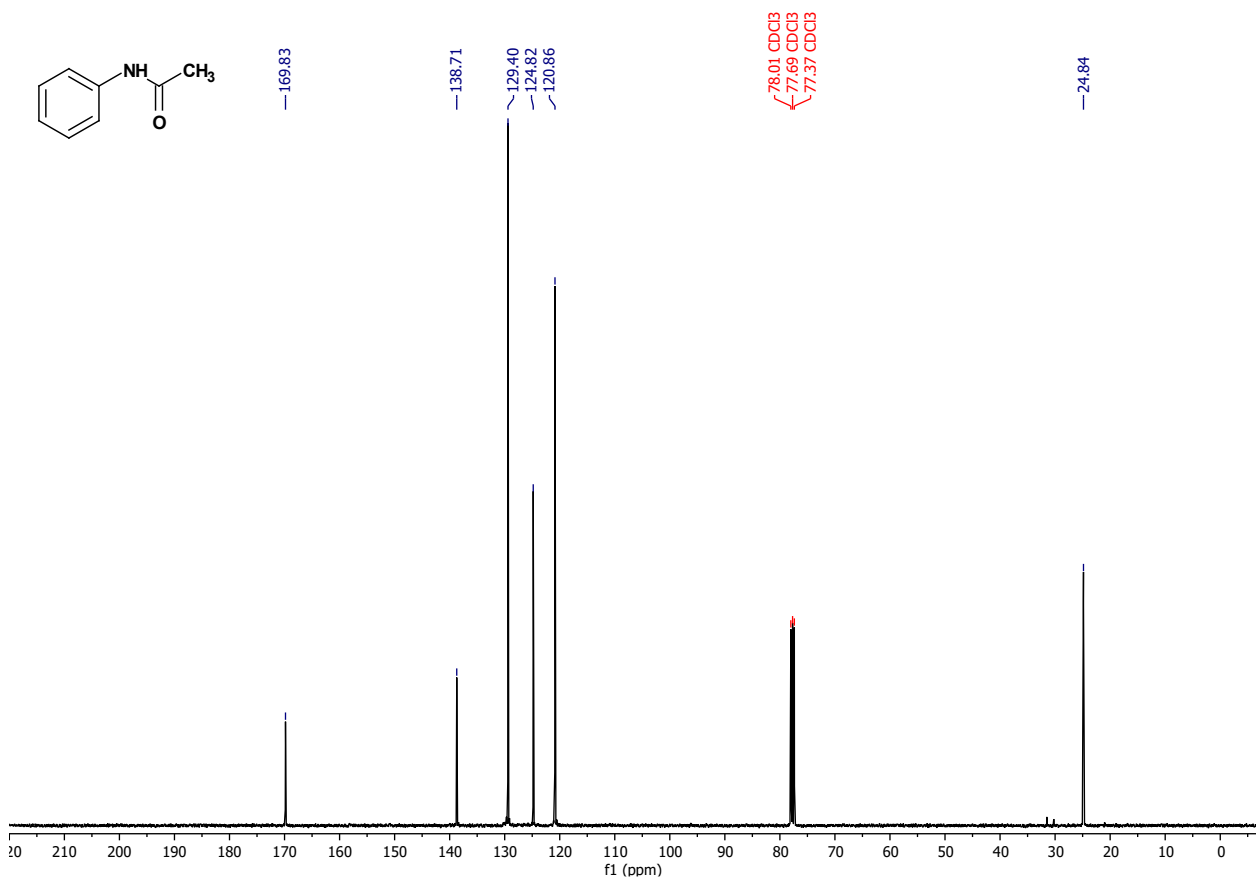



$^1\text{H}$  and  $^{13}\text{C}$  NMR *N*-(2-cyanophenyl)acetamide (**21-a**)

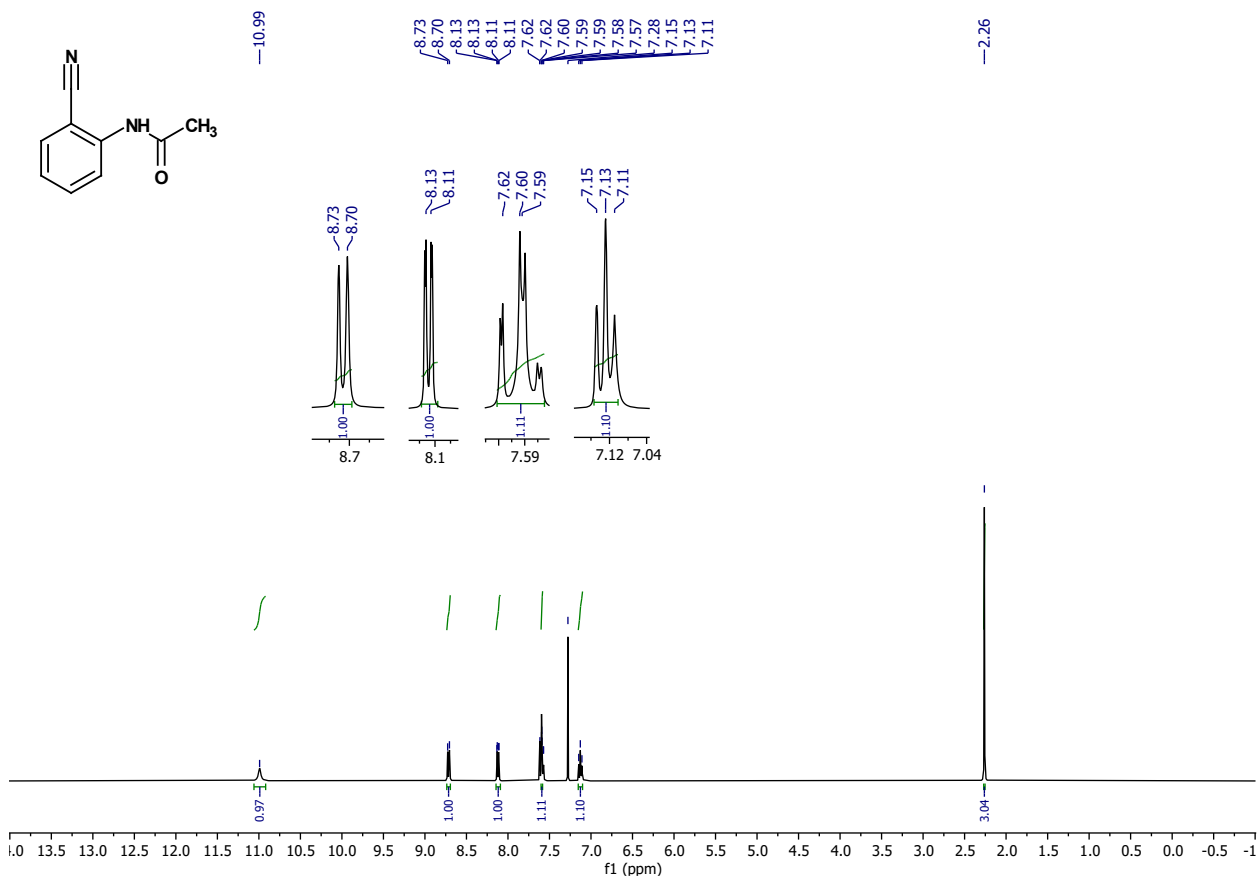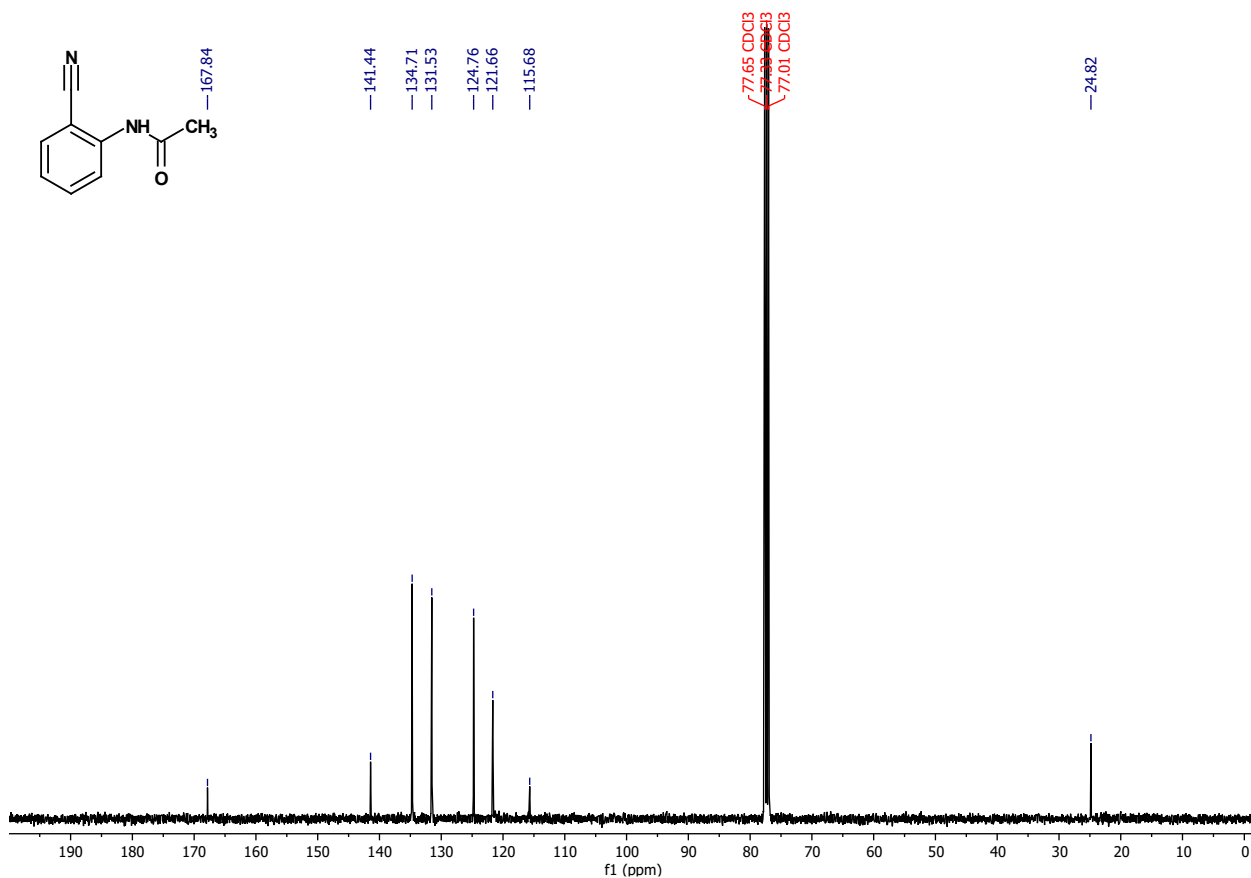

$^1\text{H}$  and  $^{13}\text{C}$  NMR *N*-(3-cyanophenyl)acetamide (**21-b**)

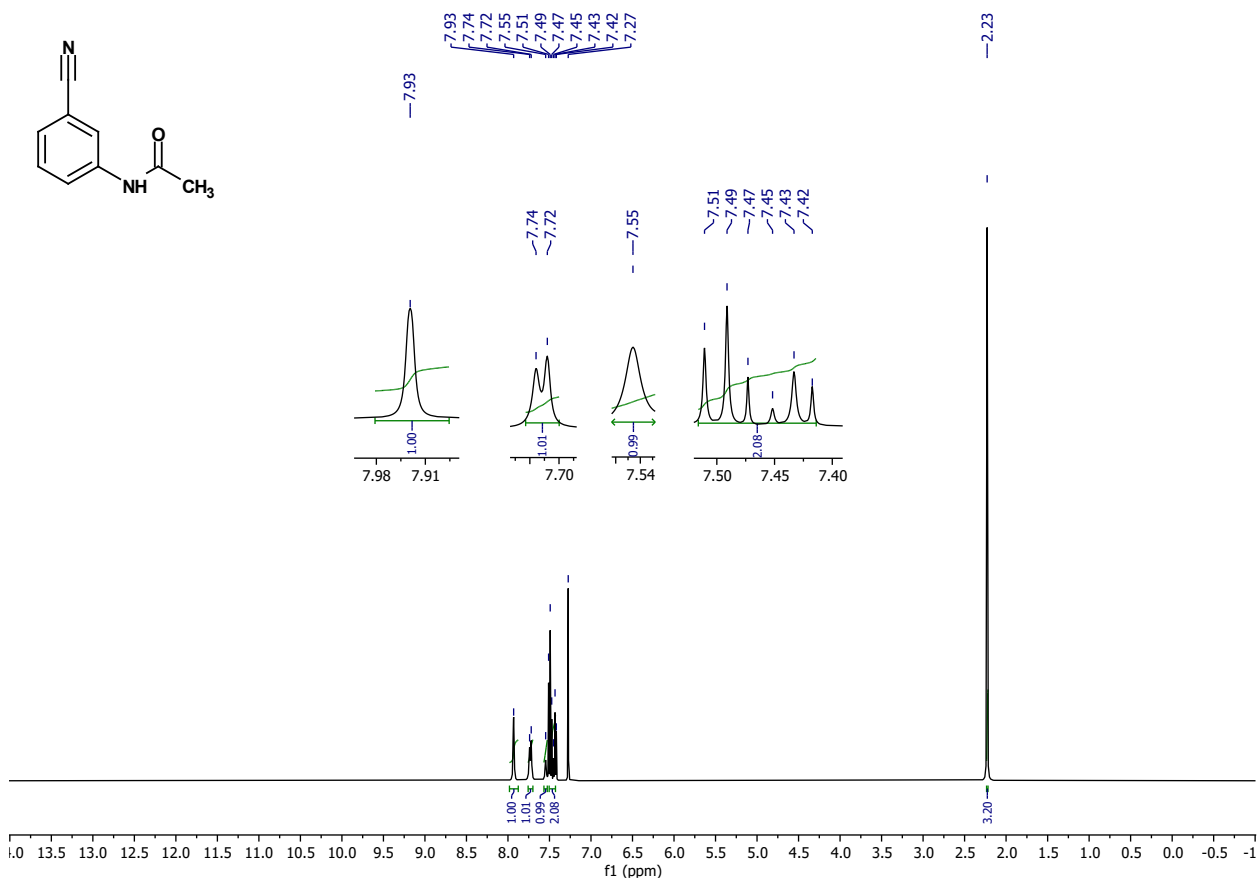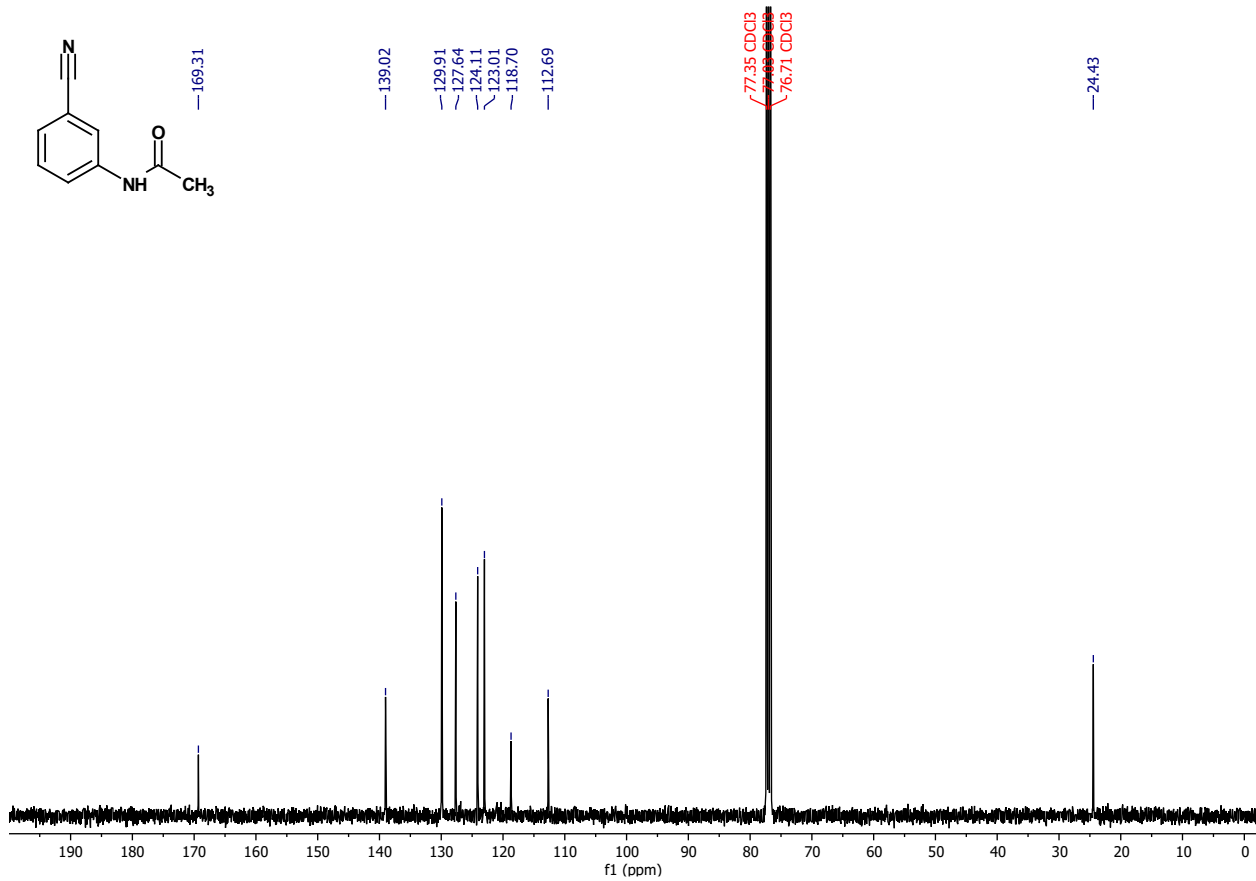

$^1\text{H}$  and  $^{13}\text{C}$  NMR *N*-(4-cyanophenyl)acetamide (**21-c**)

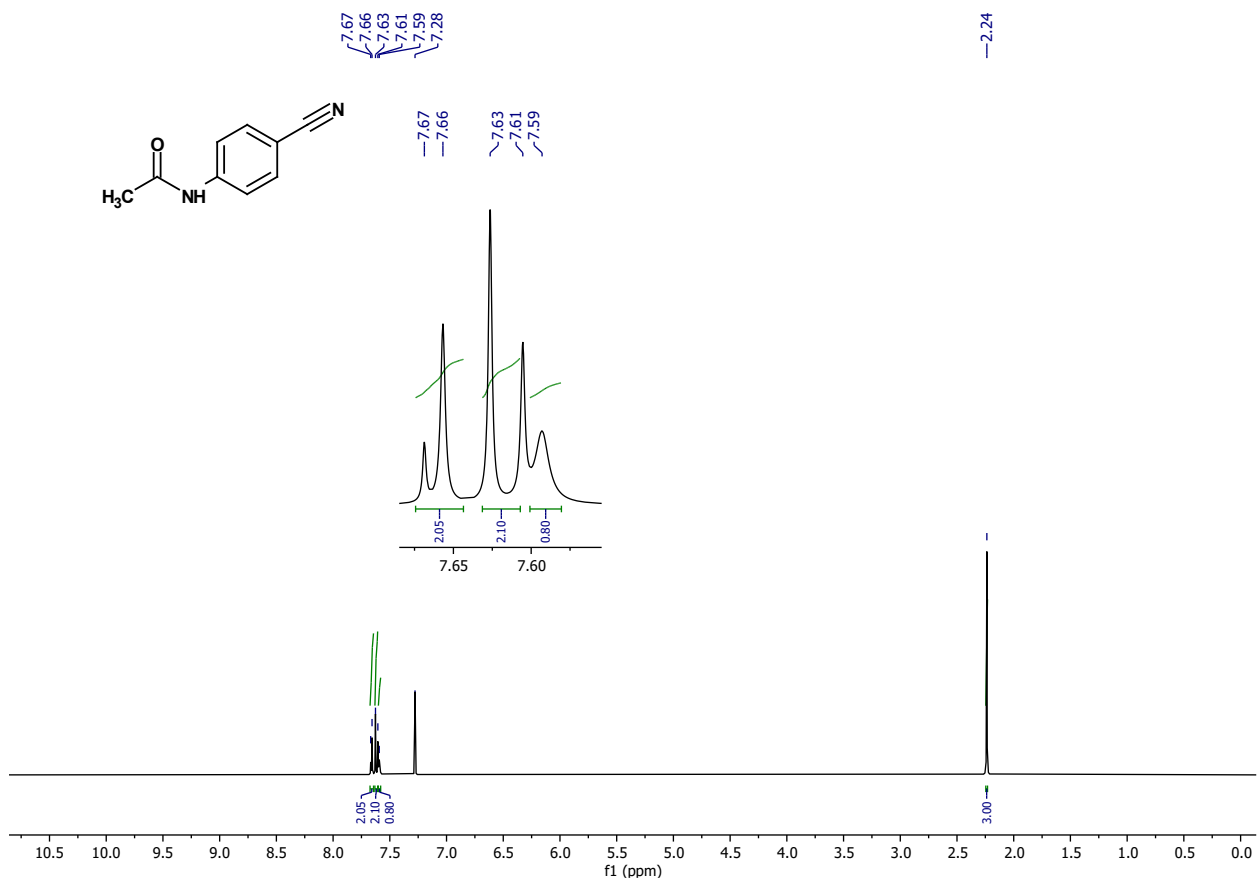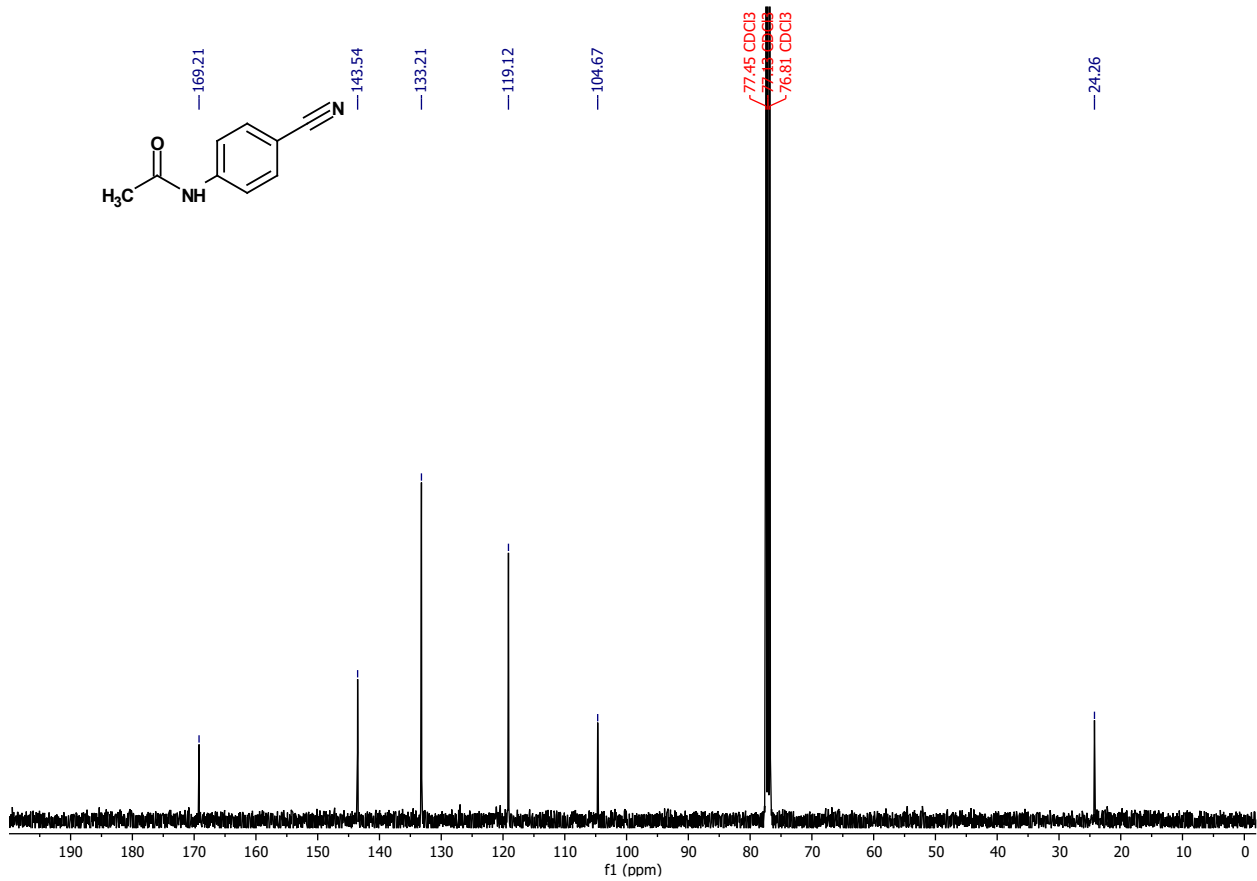

$^1\text{H}$  and  $^{13}\text{C}$  NMR *N*-(2-nitrophenyl)acetamide (**2m-a**)

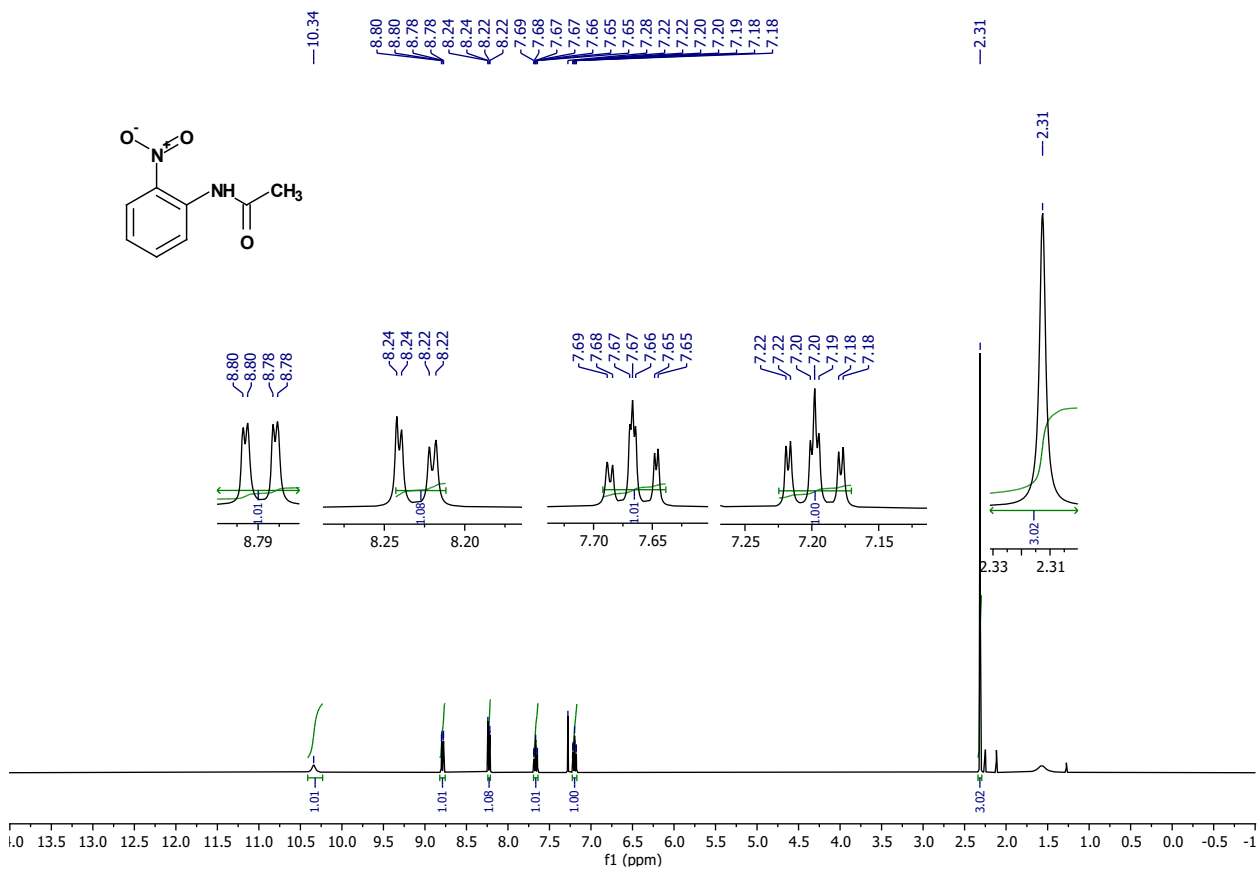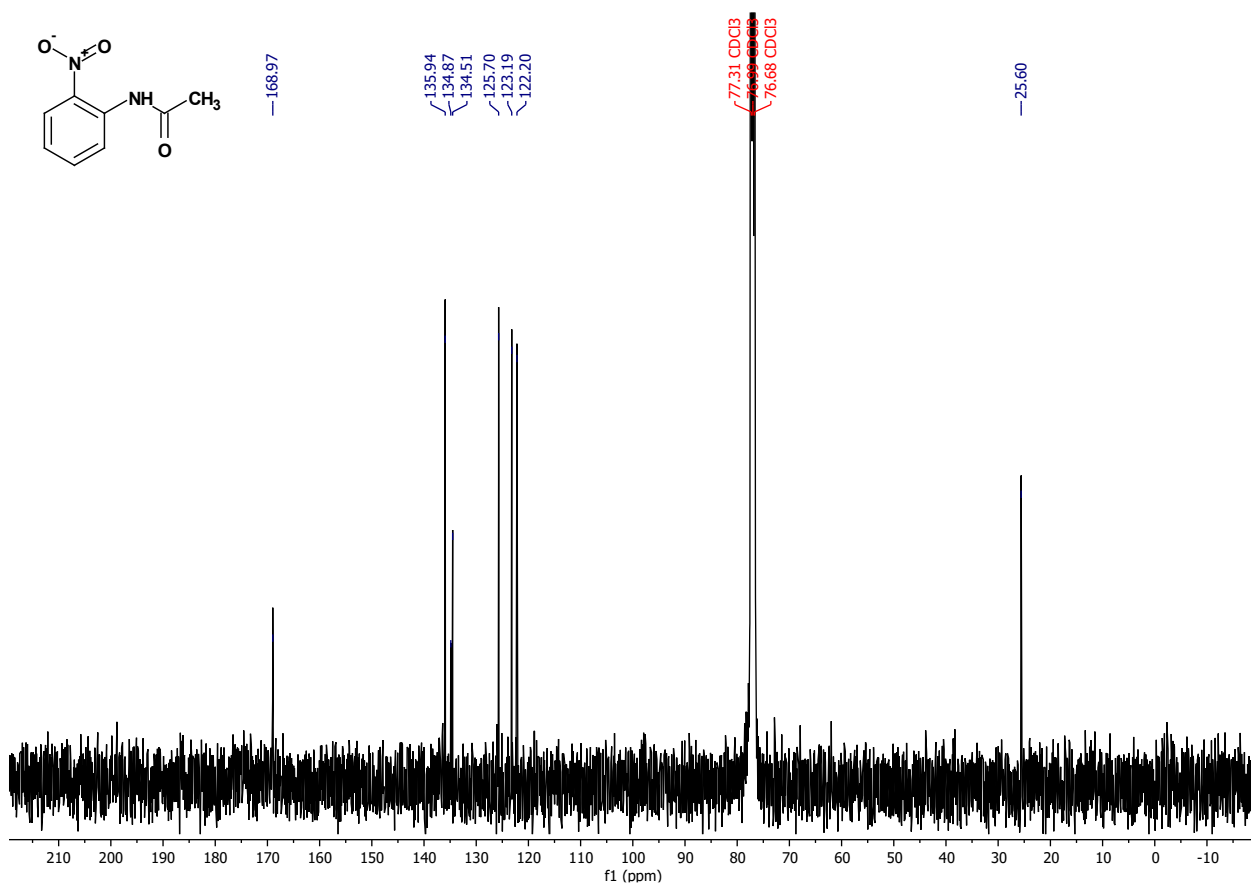

$^1\text{H}$  and  $^{13}\text{C}$  NMR *N*-(3-nitrophenyl)acetamide (**2m-b**)

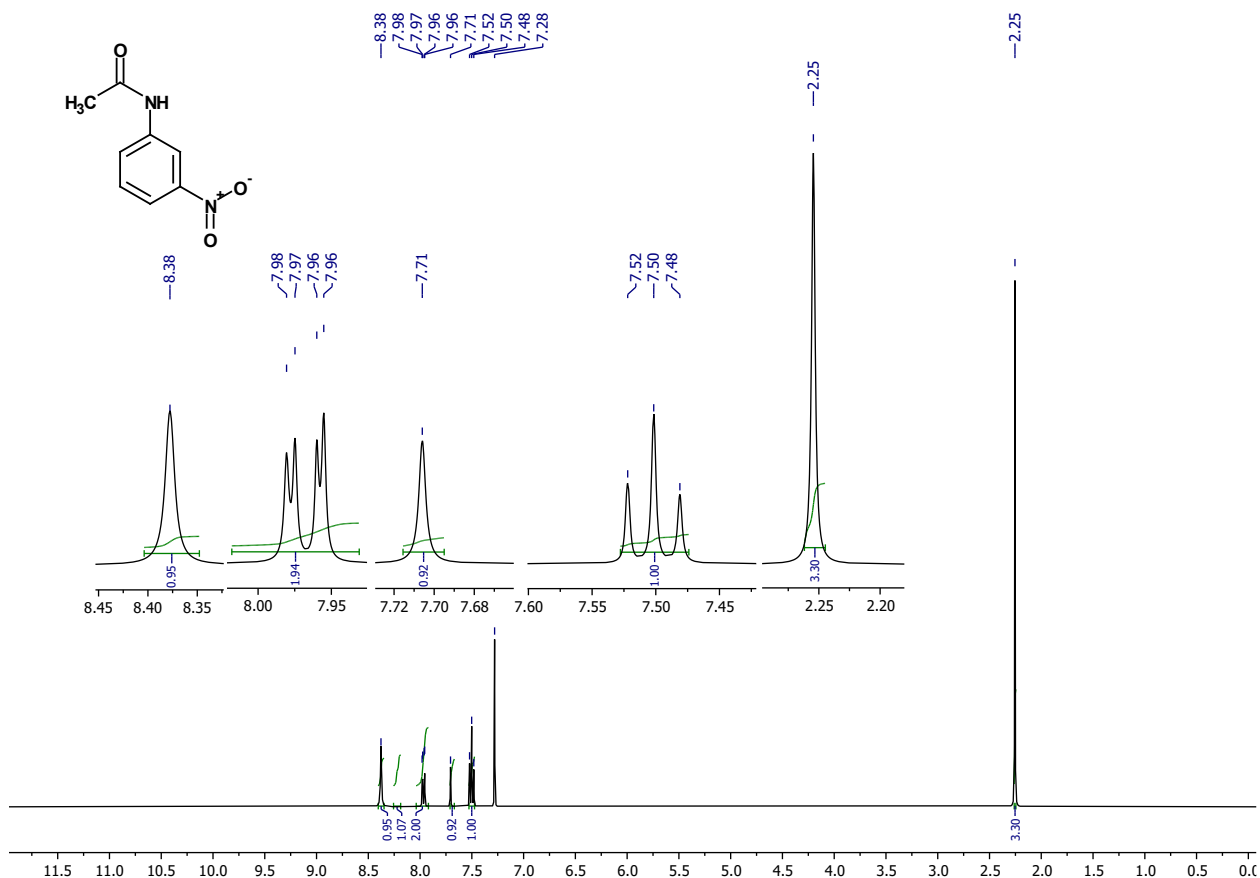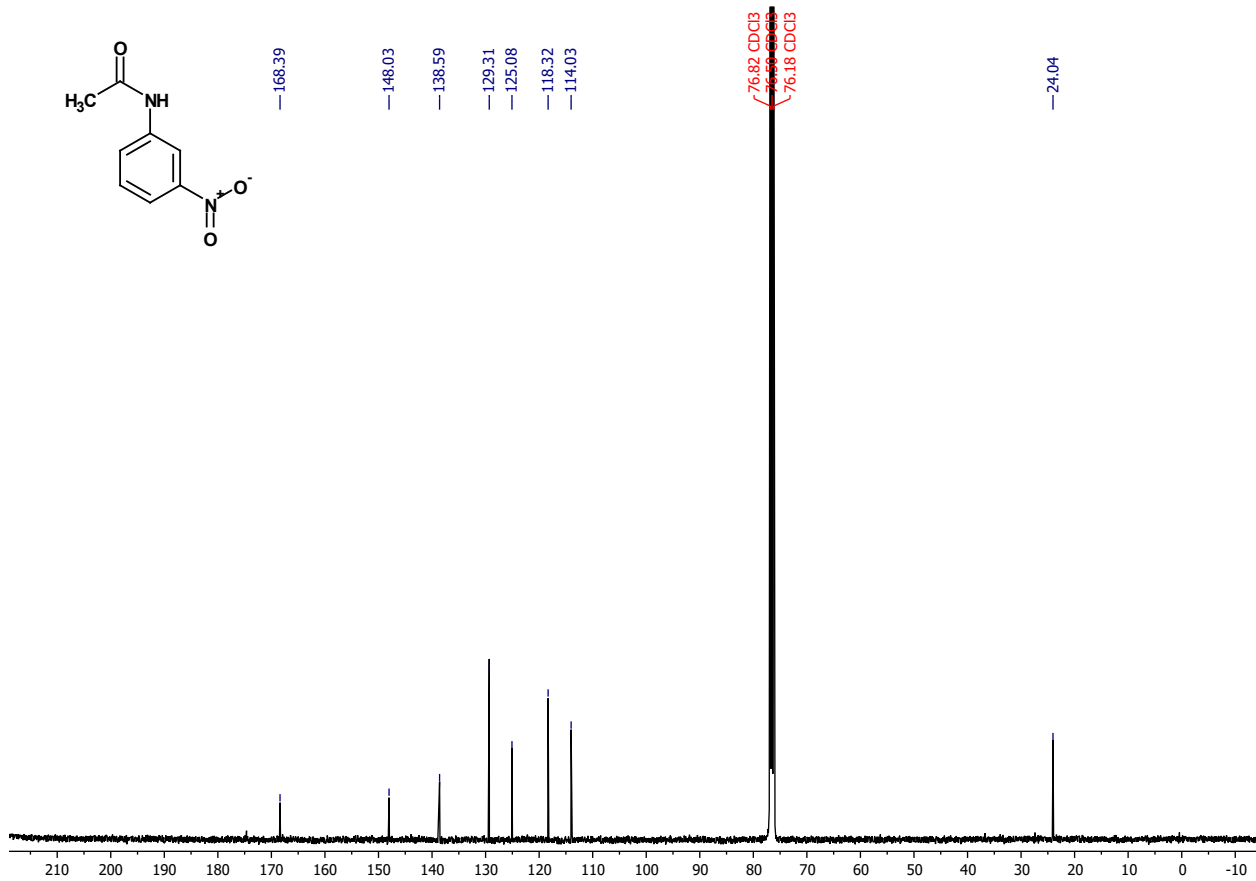

$^1\text{H}$  and  $^{13}\text{C}$  NMR *N*-(4-nitrophenyl)acetamide (**2m-c**)

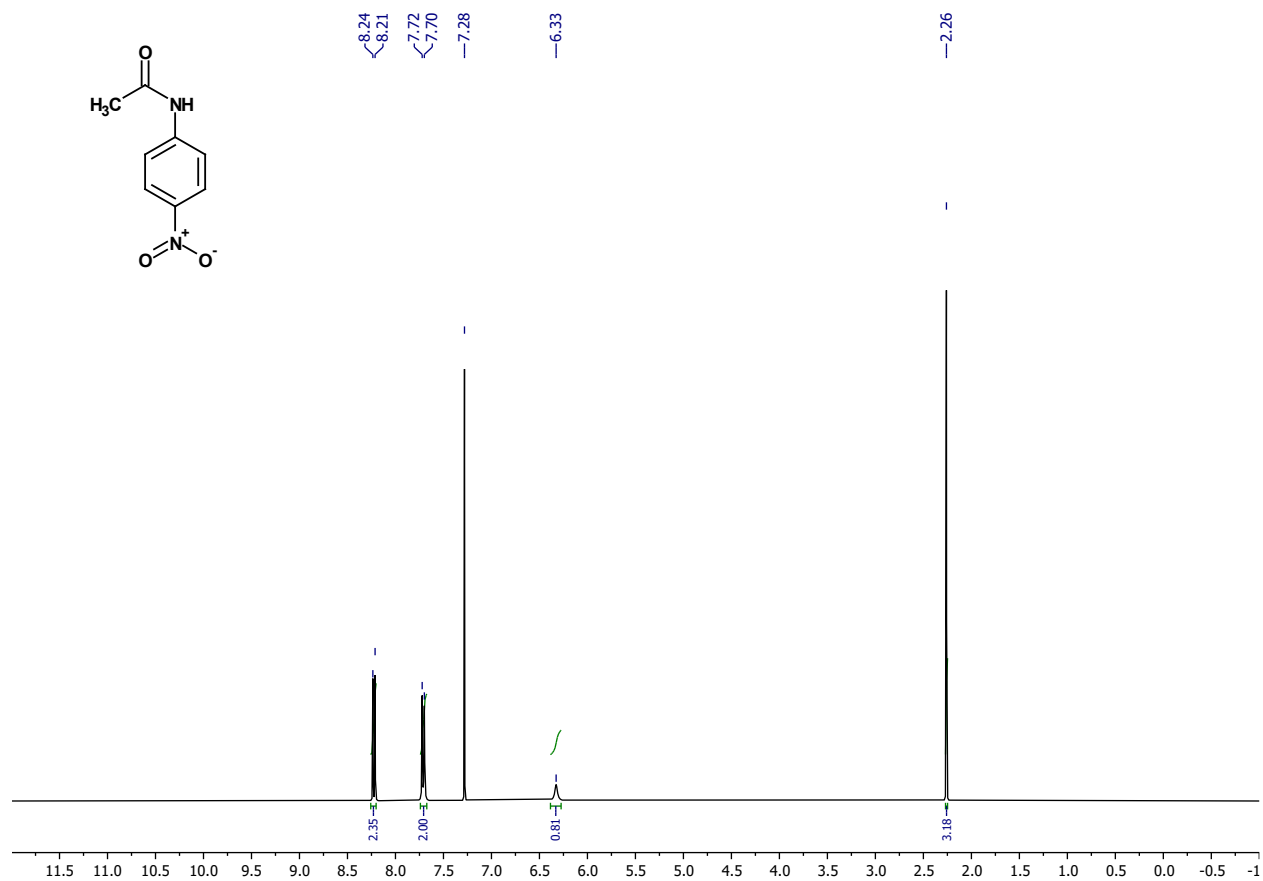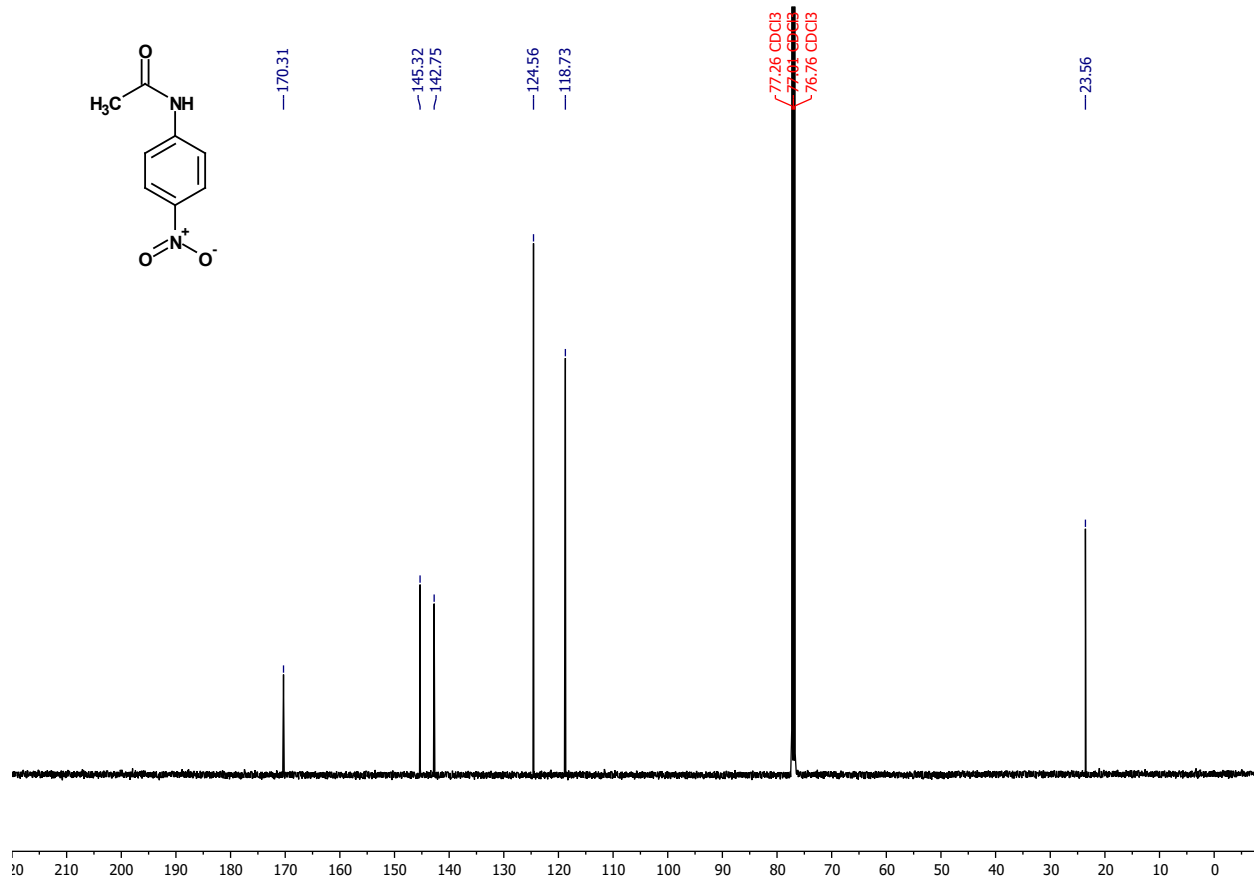

$^1\text{H}$  and  $^{13}\text{C}$  NMR *N*-(4-chloro-3-nitrophenyl)acetamide (**2n-a**) + *N*-(2-chloro-3-nitrophenyl)acetamide (**2n-b**)

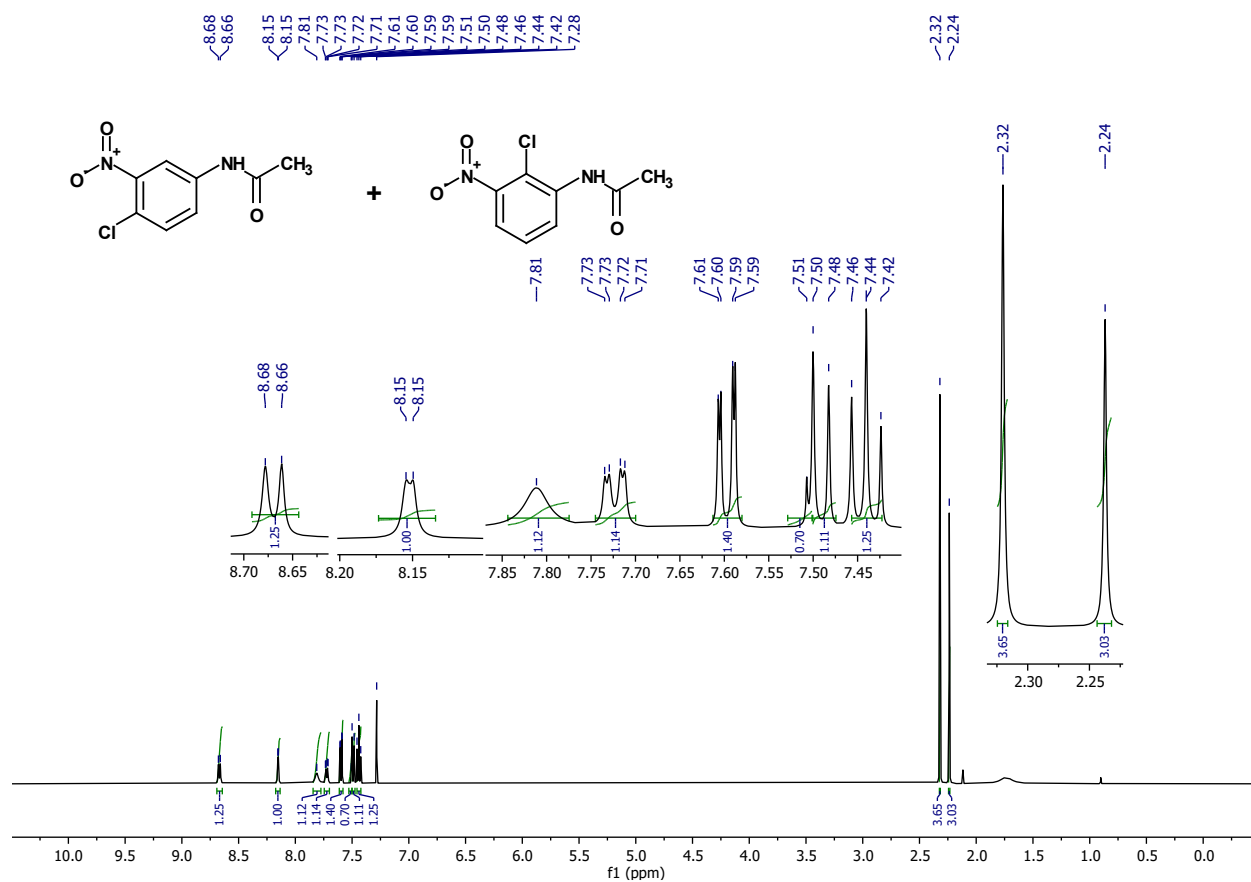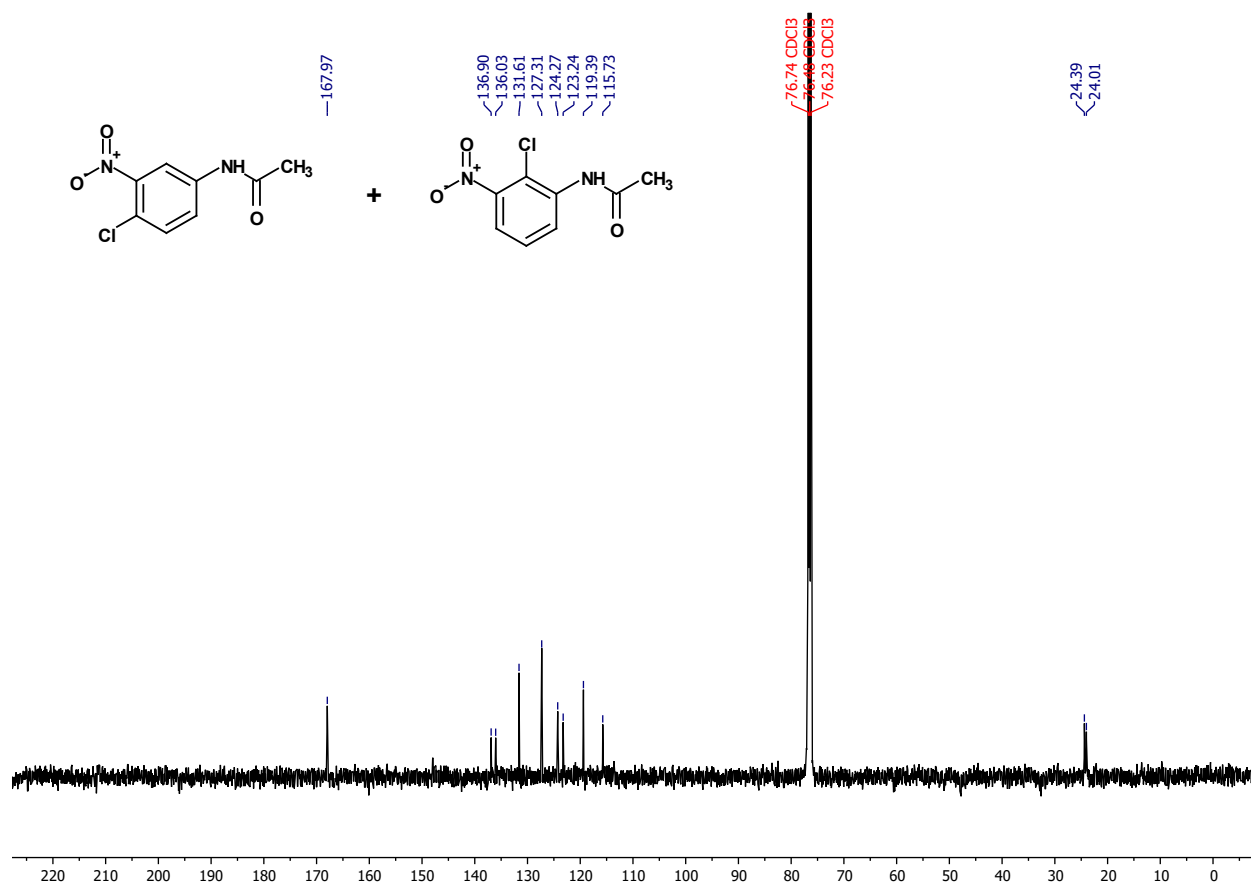

$^1\text{H}$  and  $^{13}\text{C}$  NMR *N*-(2-chloro-5-nitrophenyl)acetamide (**2o-a**)

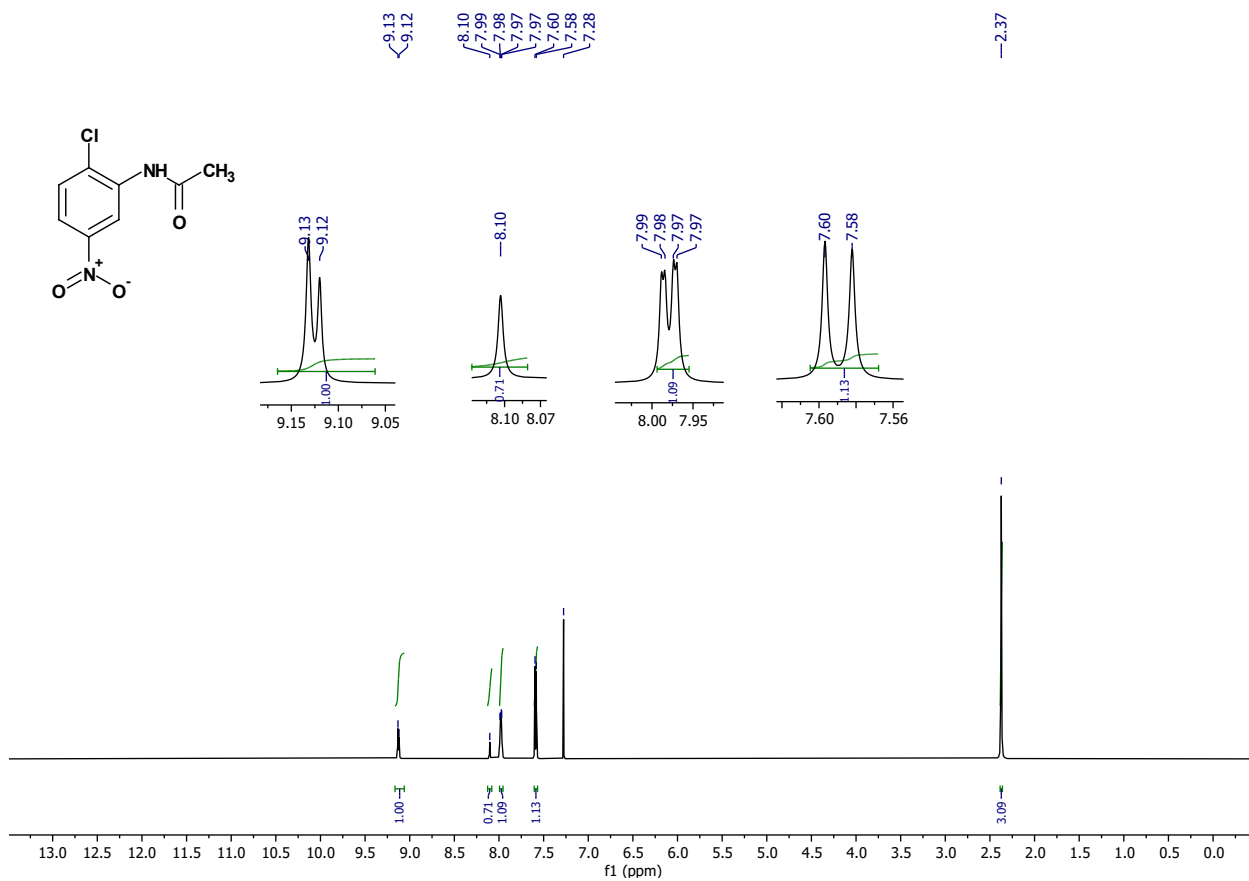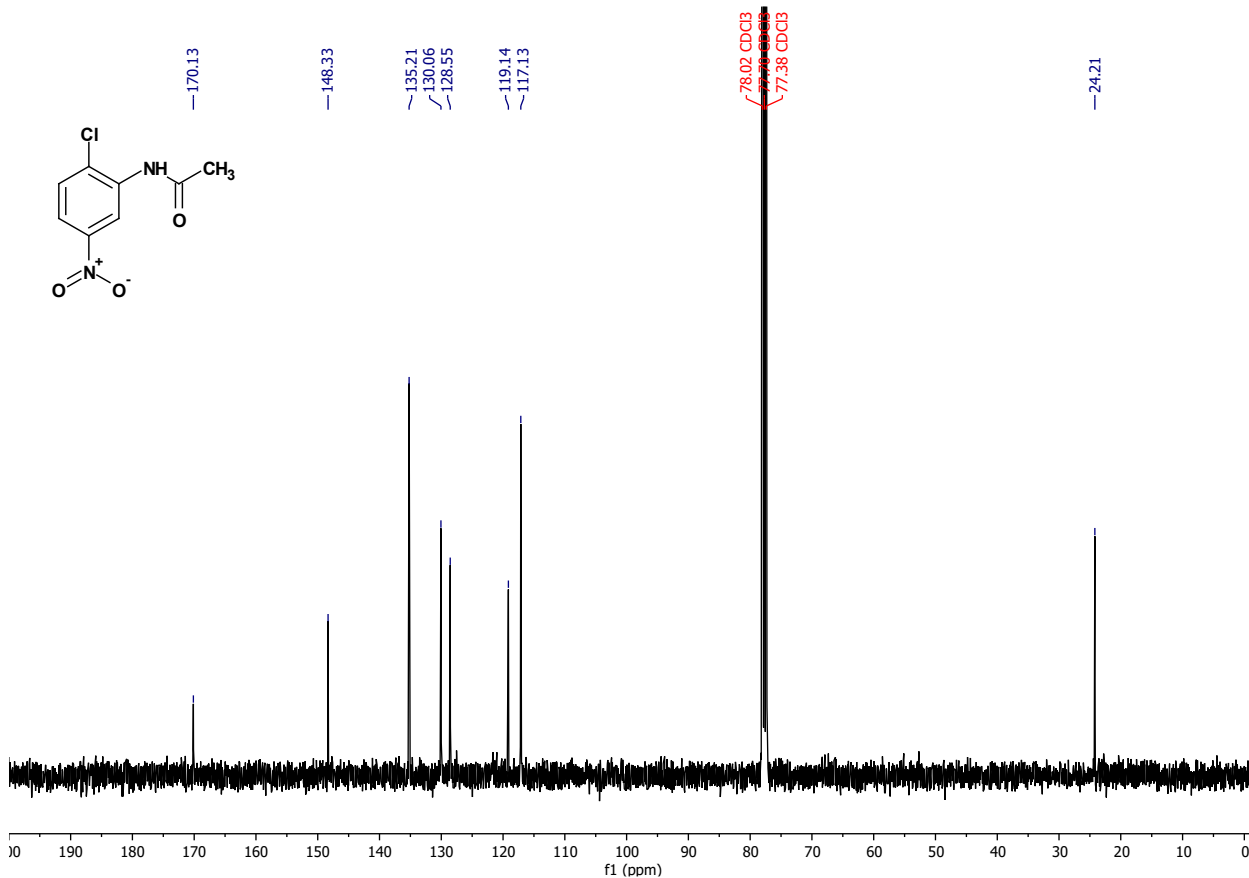



$^1\text{H}$  and  $^{13}\text{C}$  NMR *N*-(5-chloro-2-nitrophenyl)acetamide (**2o-b**)

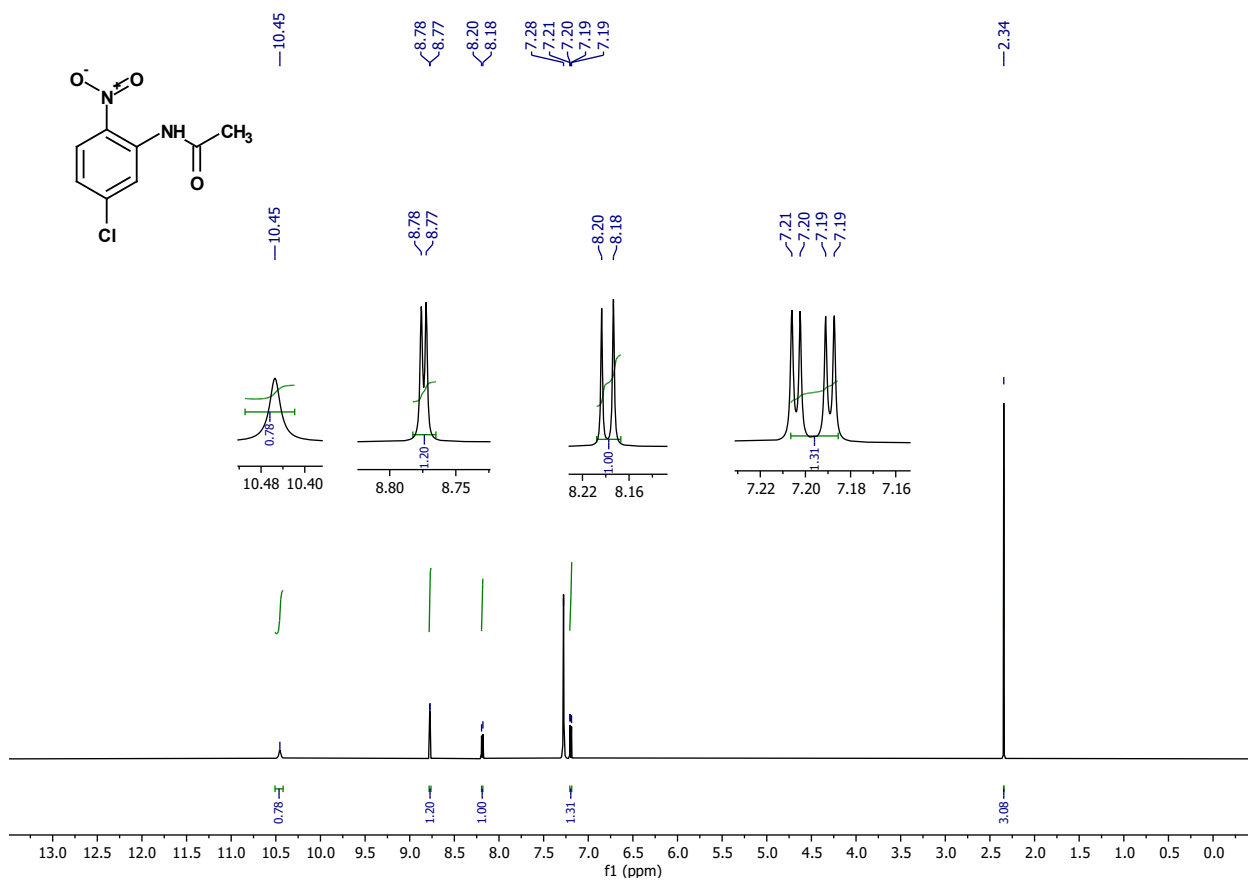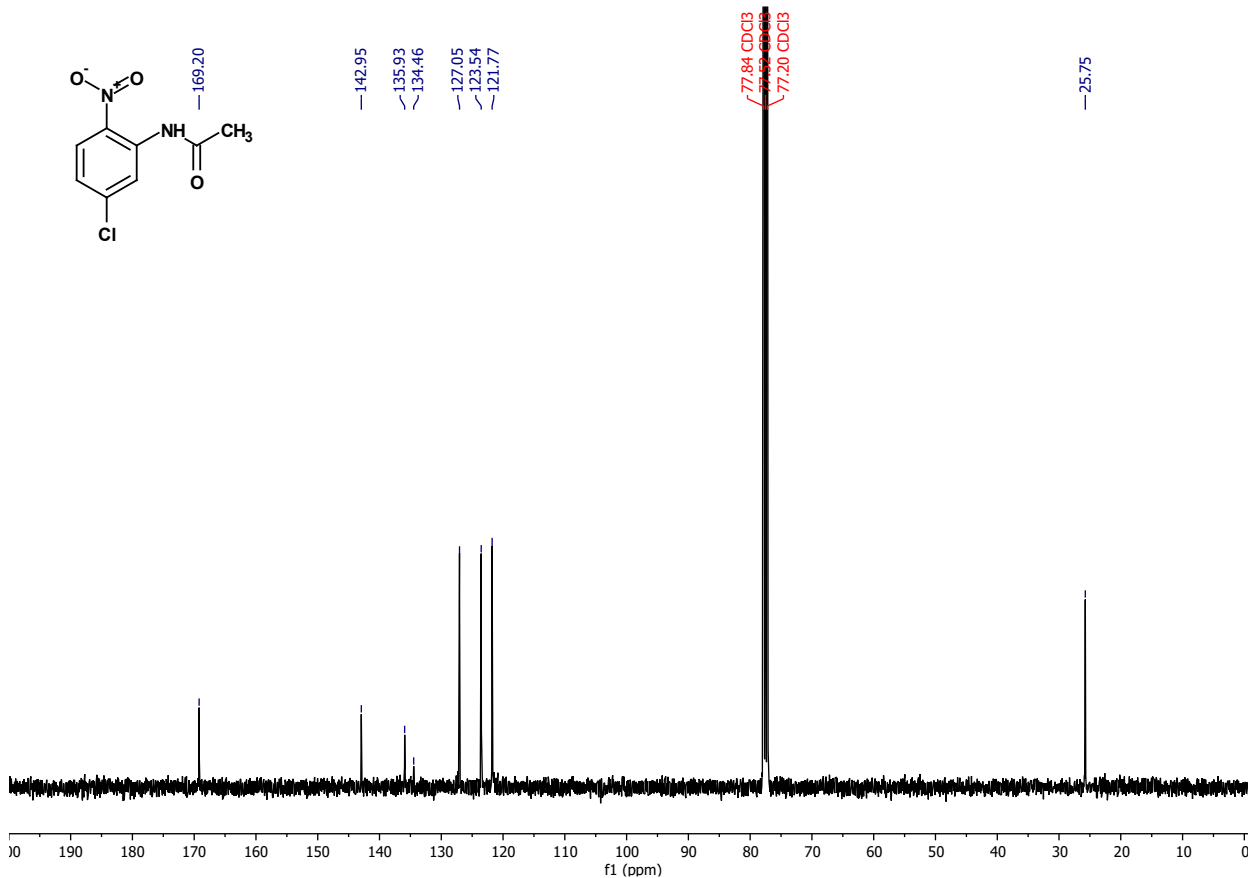

$^1\text{H}$  and  $^{13}\text{C}$  NMR *N*-(2-fluoro-5-nitrophenyl)acetamide (**2p**)

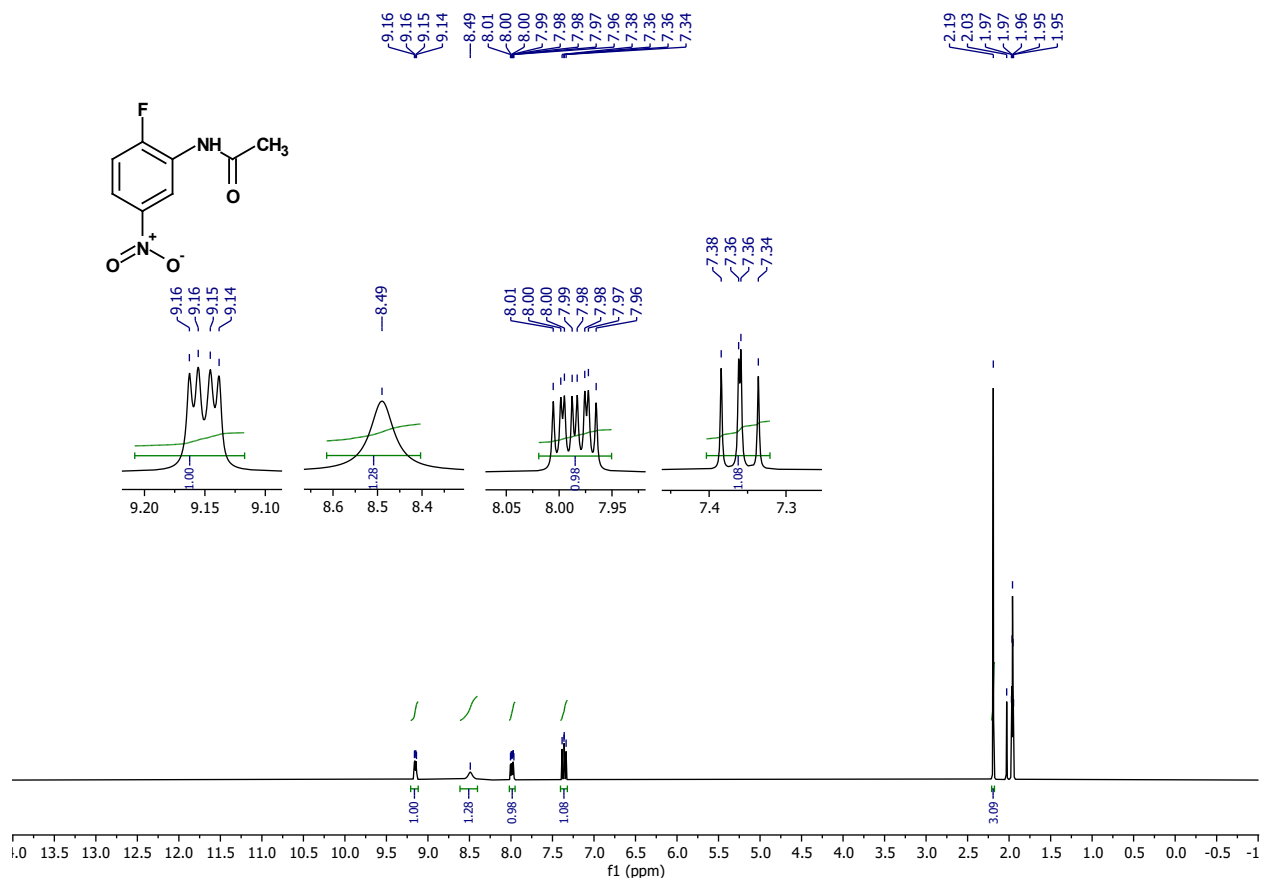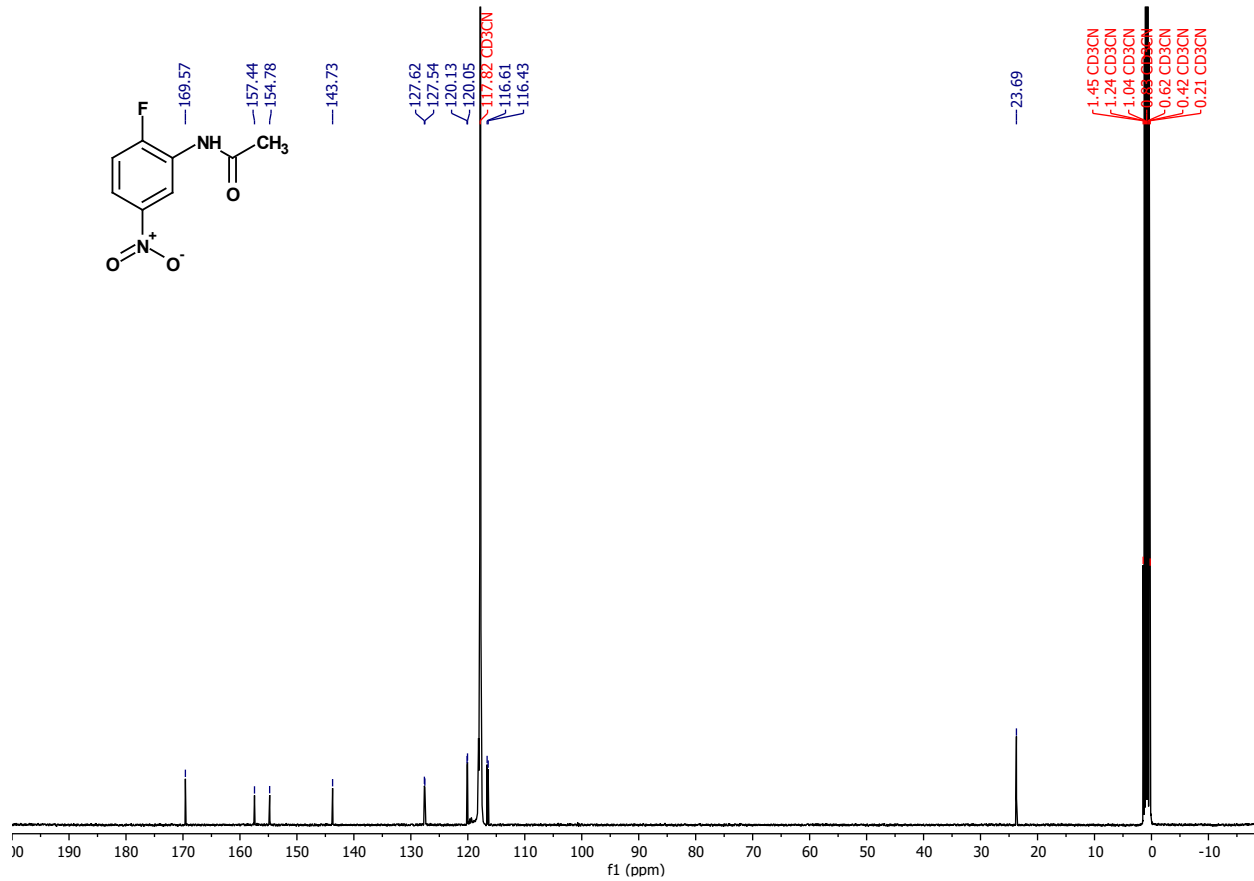

$^{19}\text{F}$  NMR *N*-(2-fluoro-5-nitrophenyl)acetamide (**2p**)

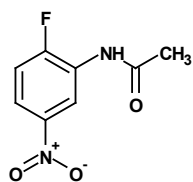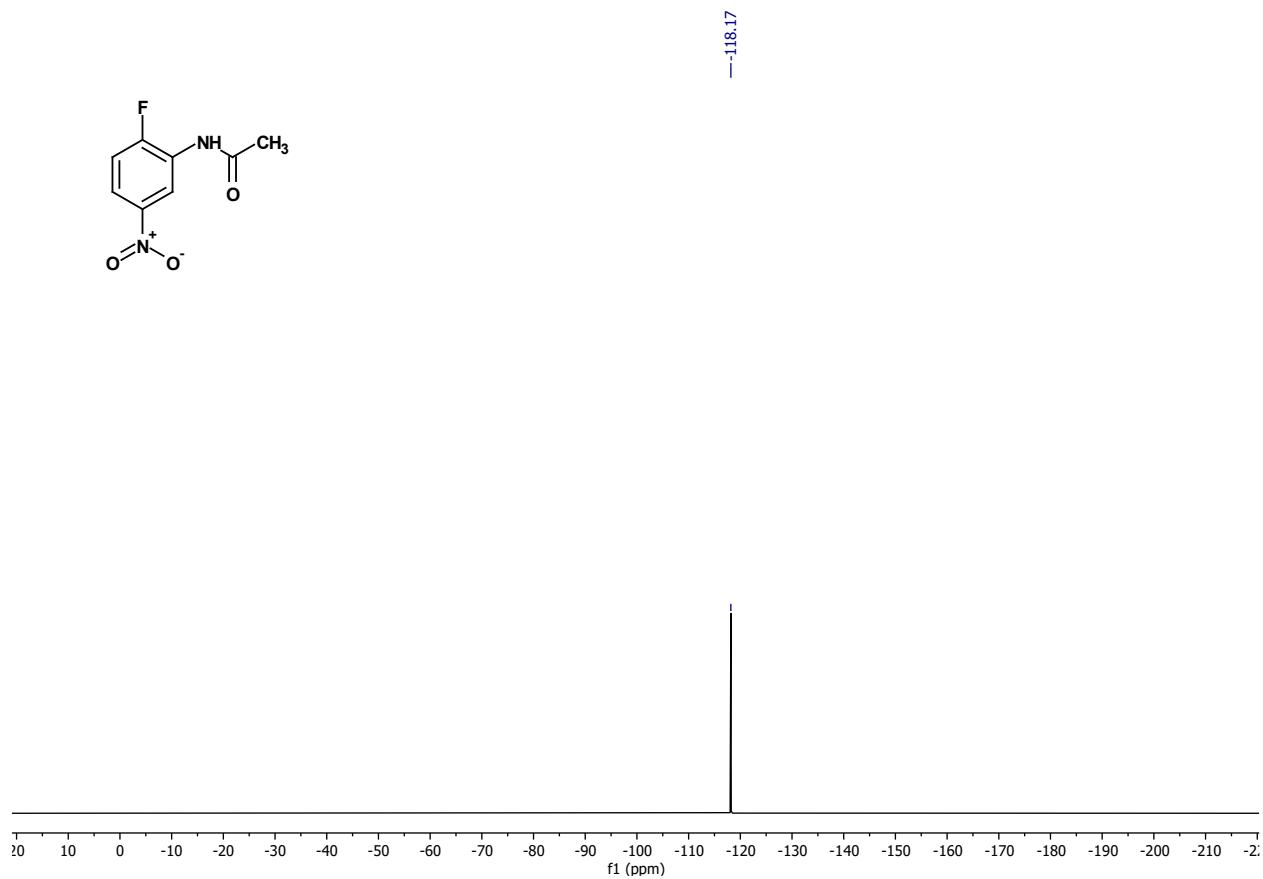

<sup>1</sup>H and <sup>13</sup>C NMR *N*-(2-bromo-5-nitrophenyl) acetamide (**2q**)

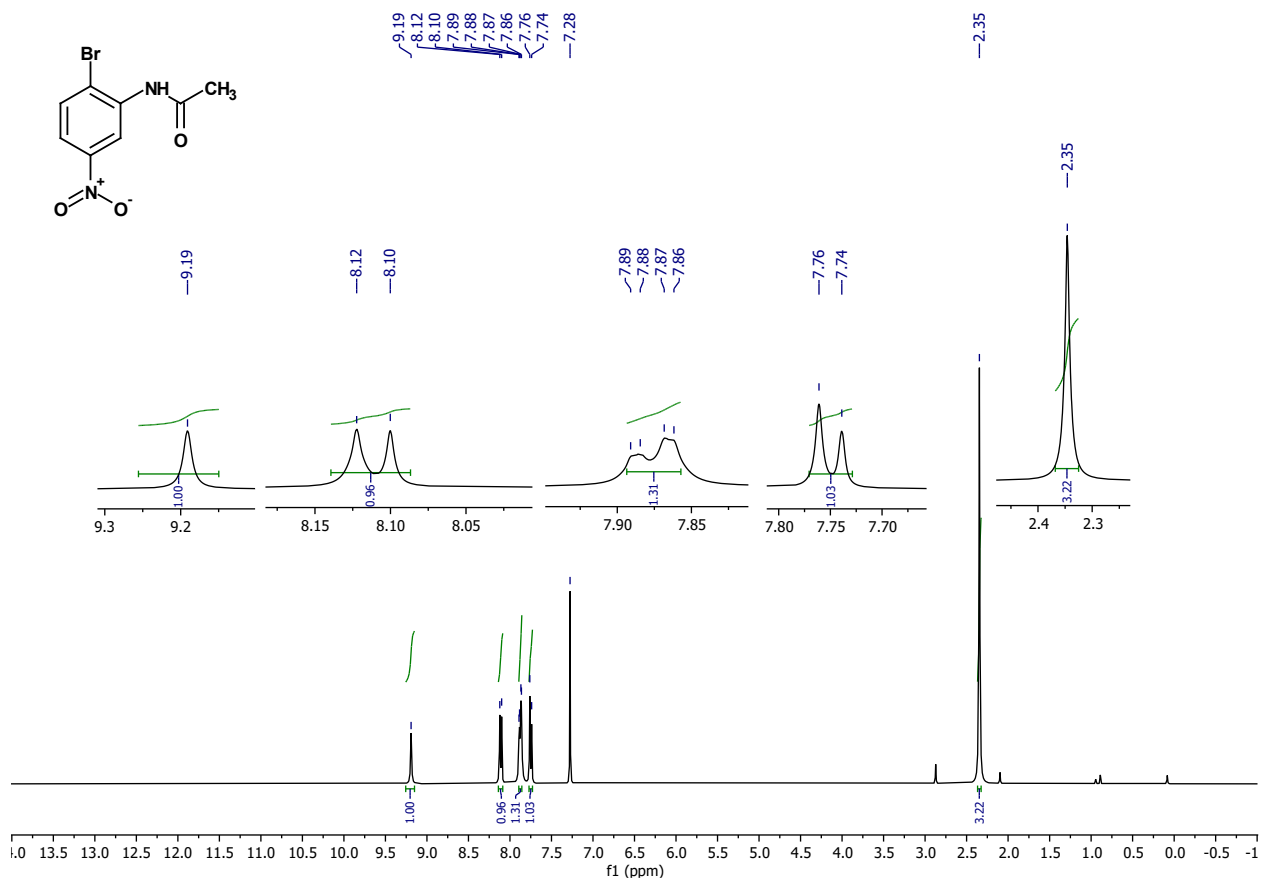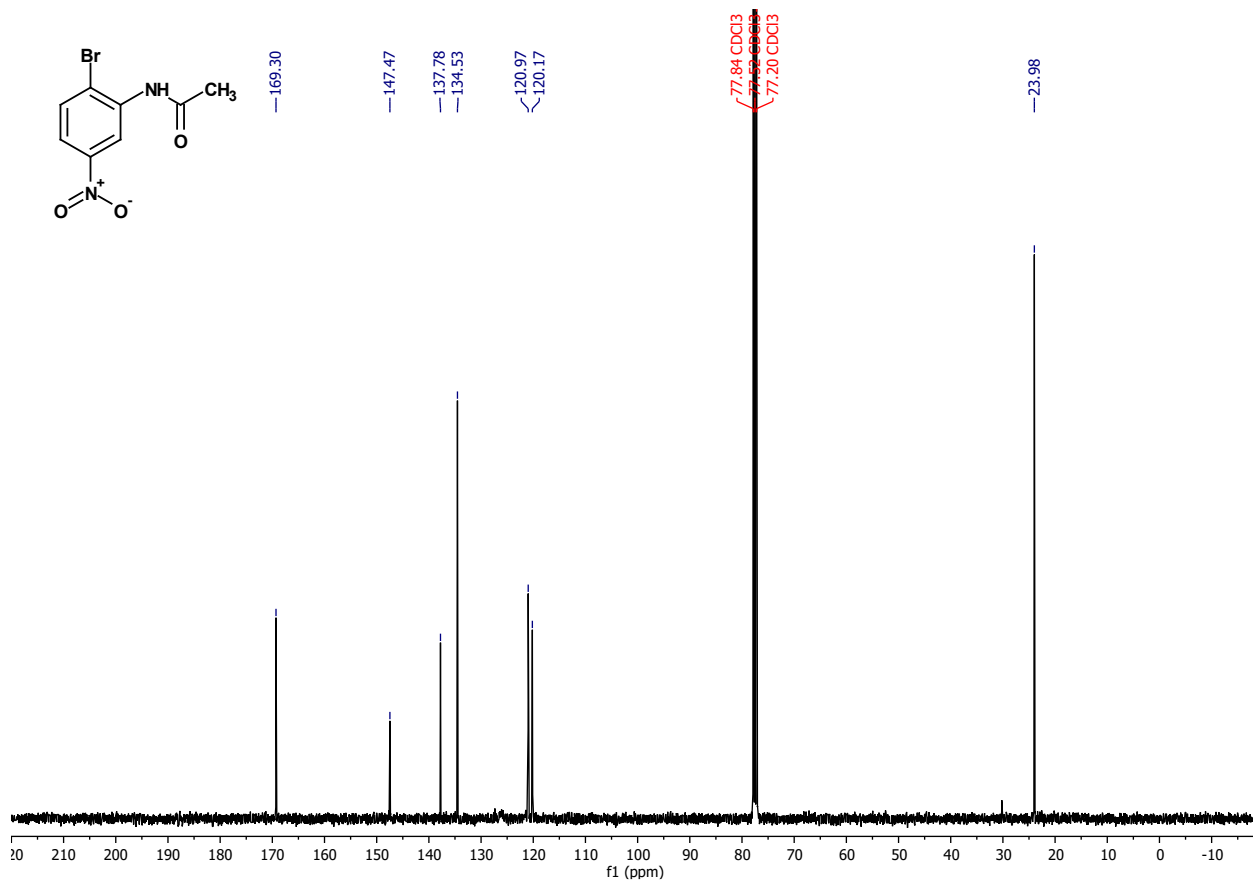

$^1\text{H}$  and  $^{13}\text{C}$  NMR Ethyl 2-acetamidobenzoate (**2r-a**)

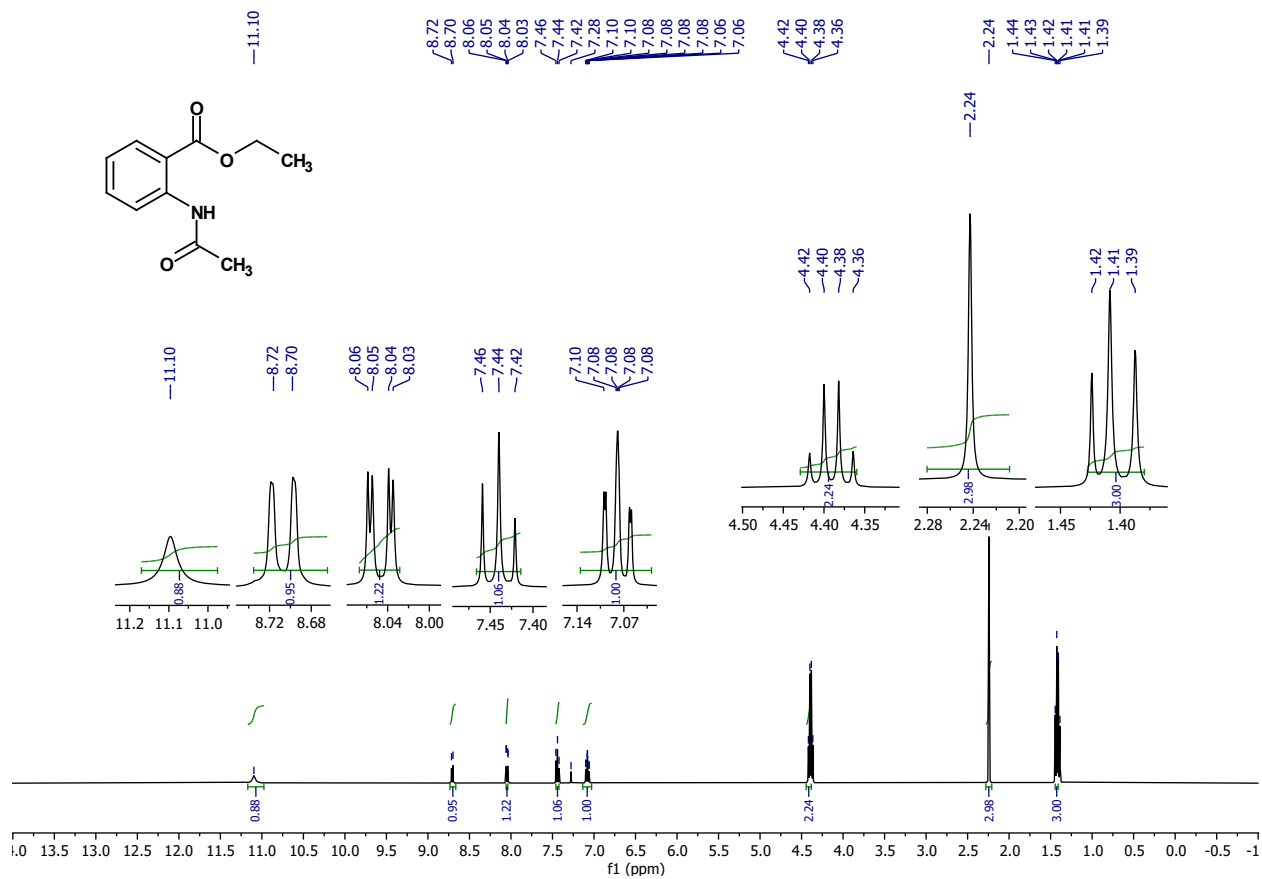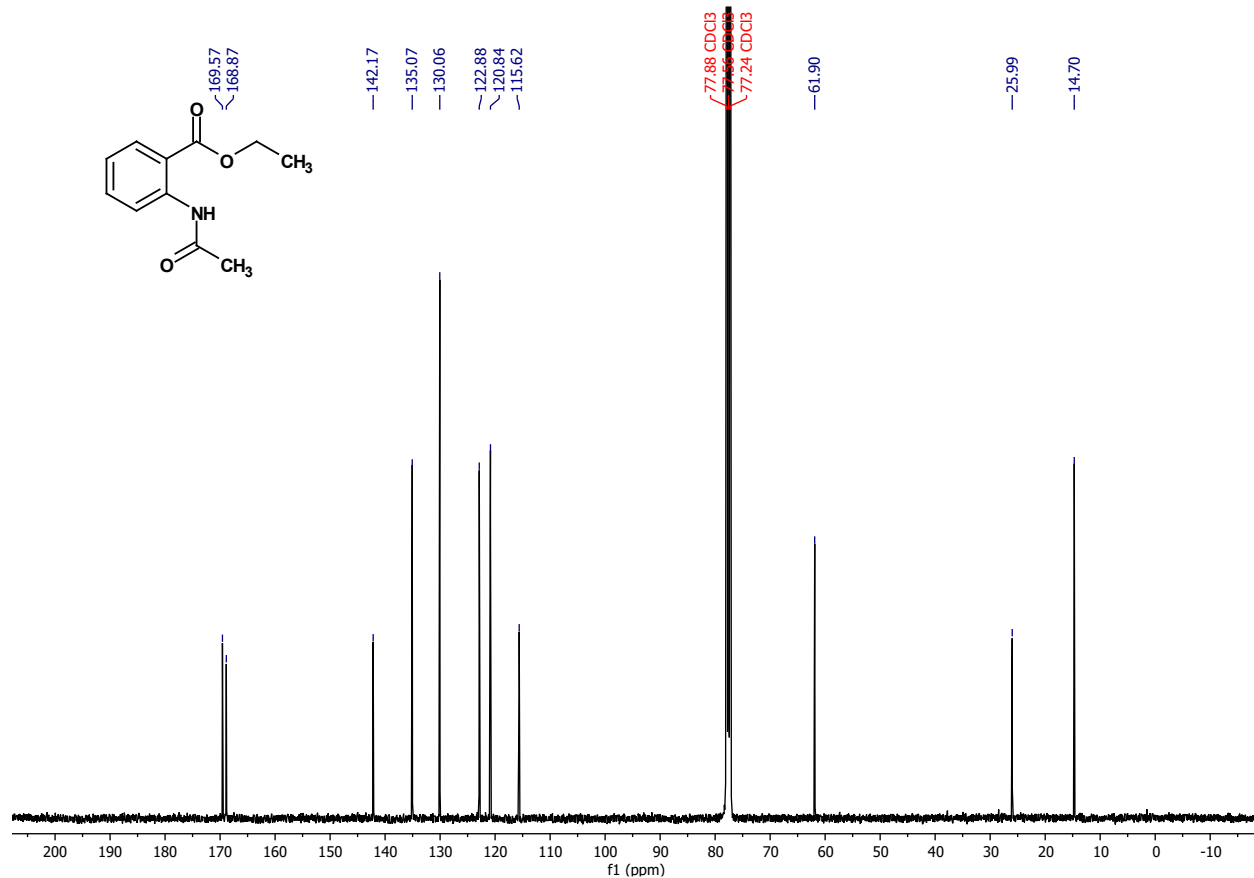

$^1\text{H}$  and  $^{13}\text{C}$  NMR Ethyl 3-acetamidobenzoate (**2r-b**) + Ethyl 4-((methoxycarbonyl)amino)benzoate (**2r-c**)

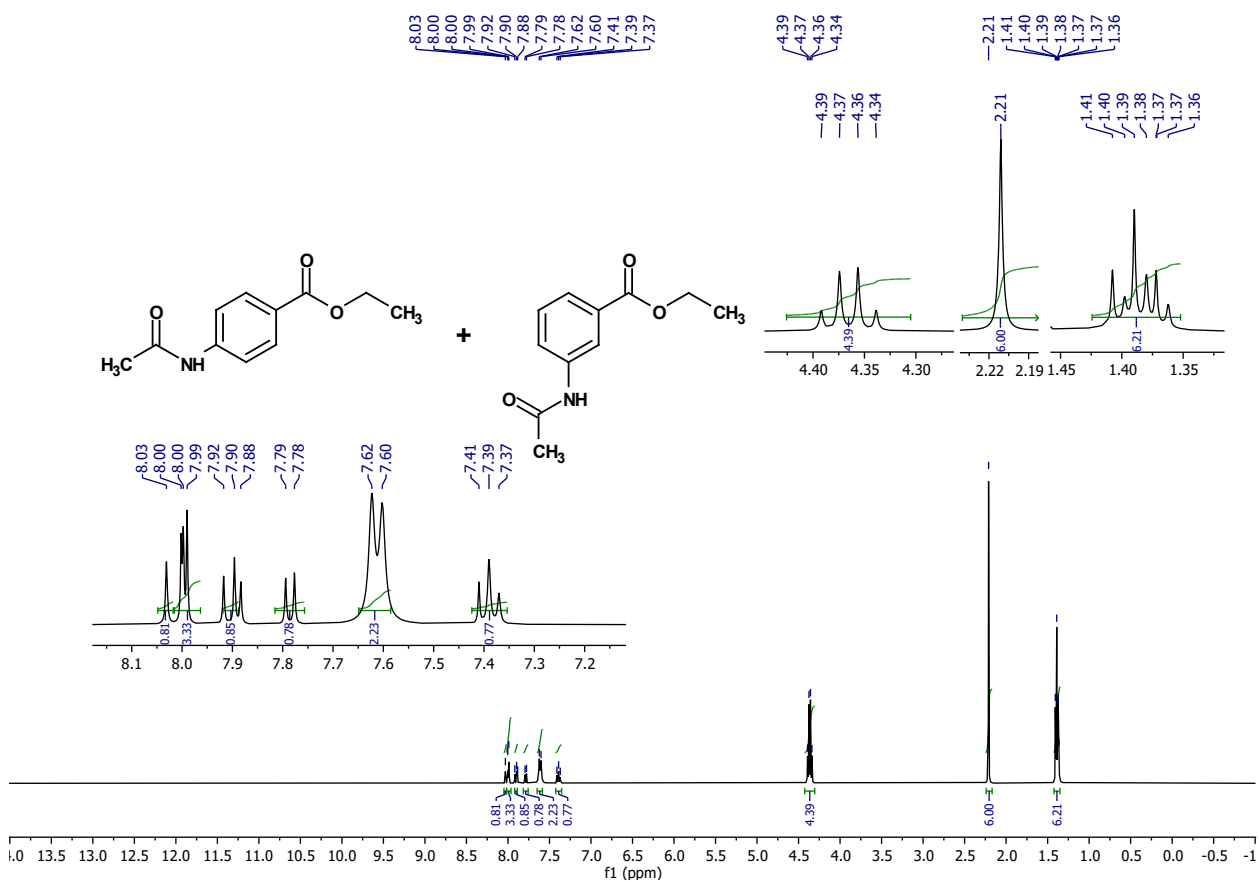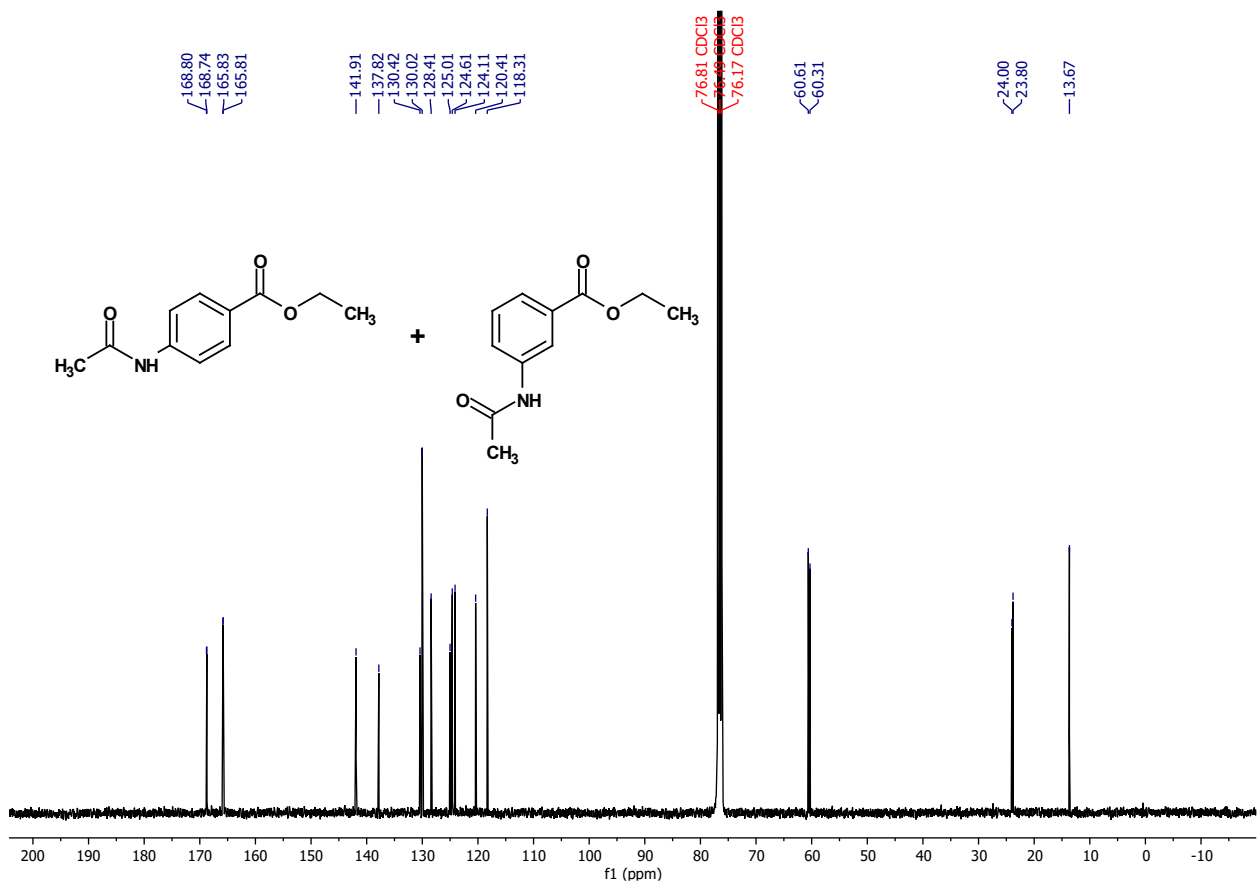

$^1\text{H}$  and  $^{13}\text{C}$  NMR Dimethyl 4-acetamidophthalate (**2s-a**)

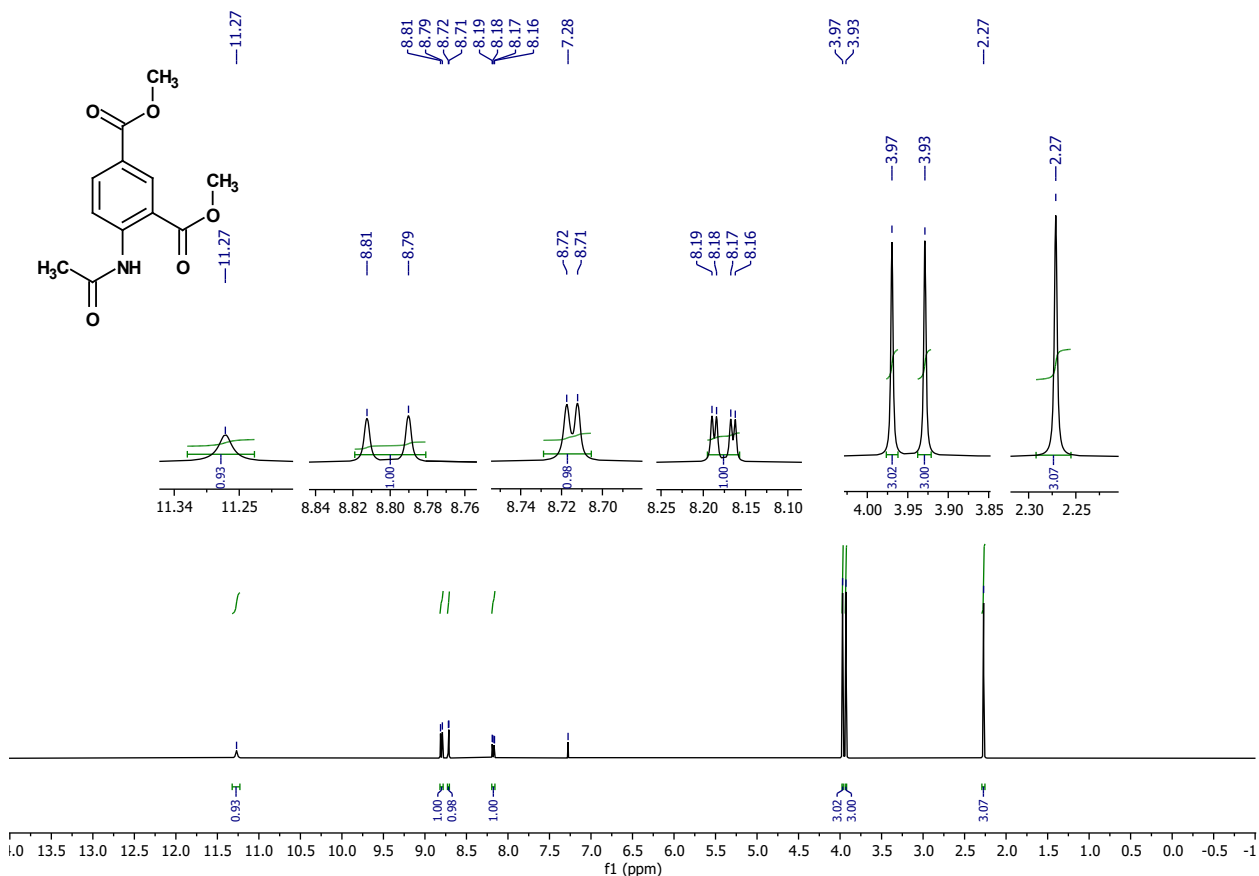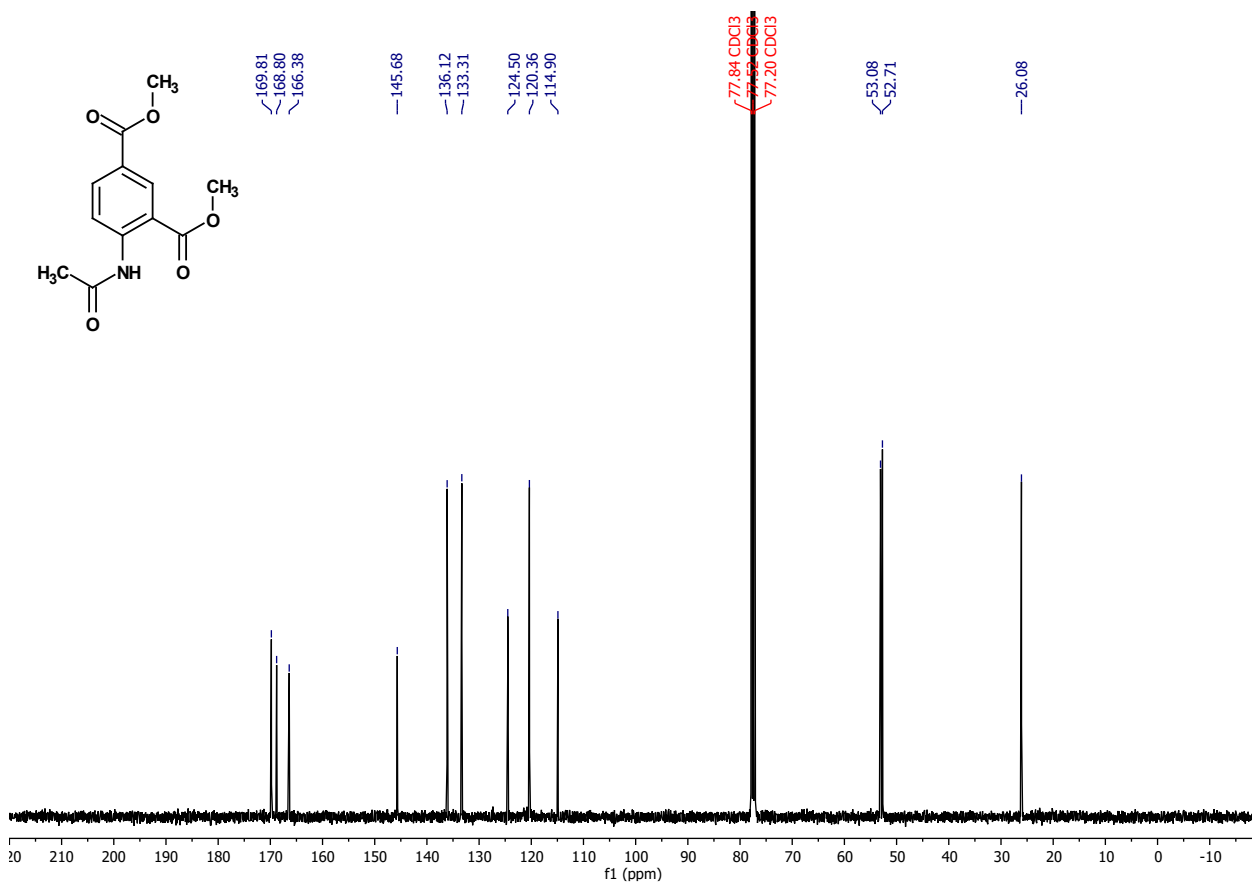

# $^1\text{H}$ and $^{13}\text{C}$ NMR Dimethyl 2-acetamidophthalate (**2s-b**)

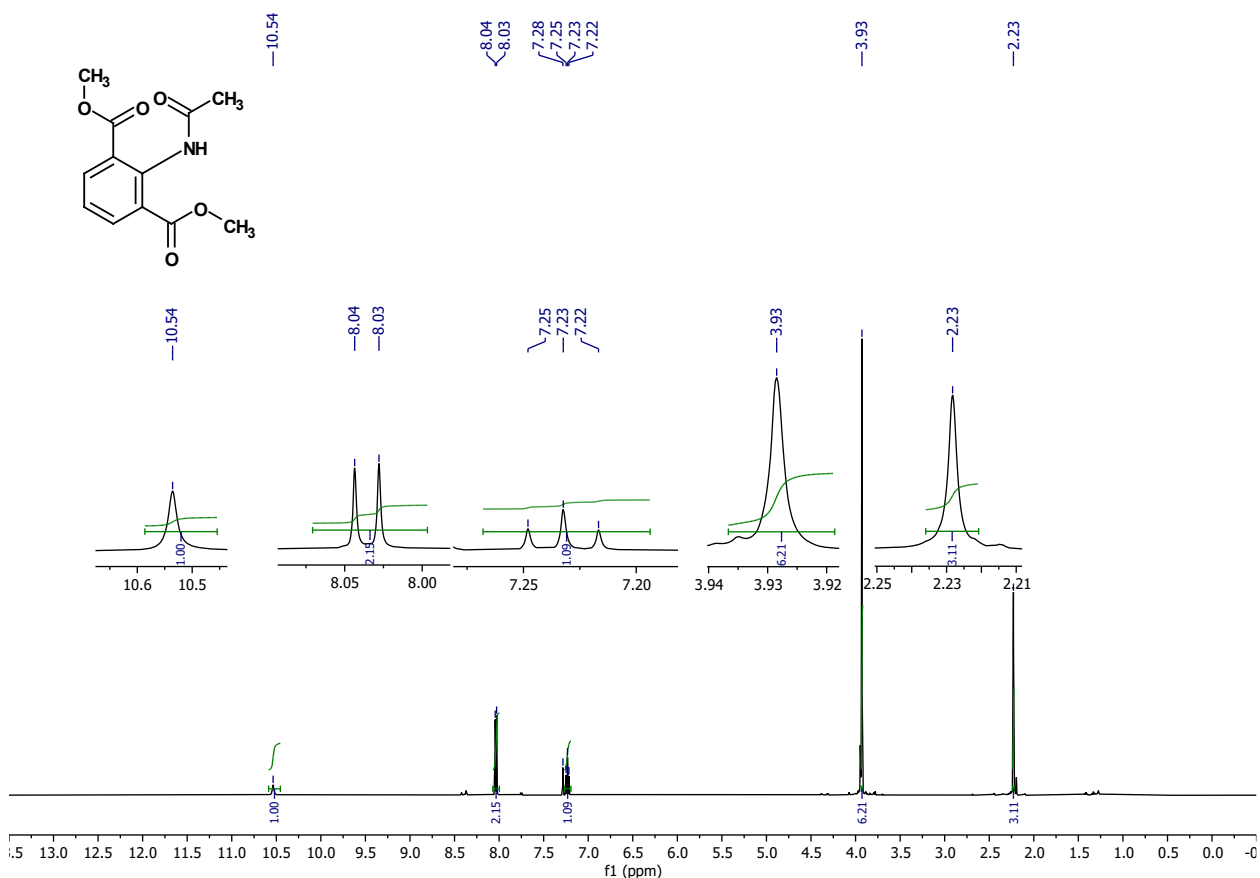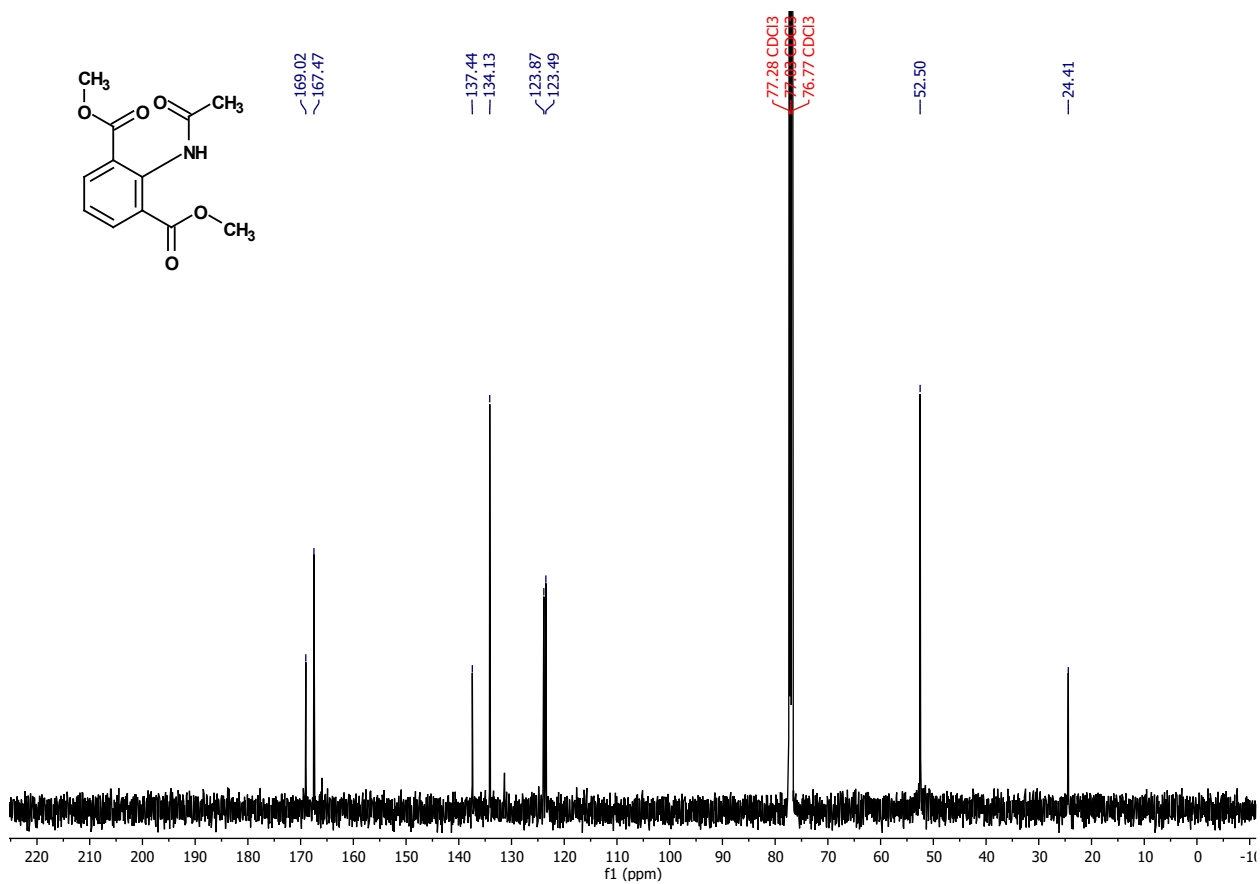



$^1\text{H}$  and  $^{13}\text{C}$  NMR *N*-(4-hydroxyphenyl)acetamide (**2t**)

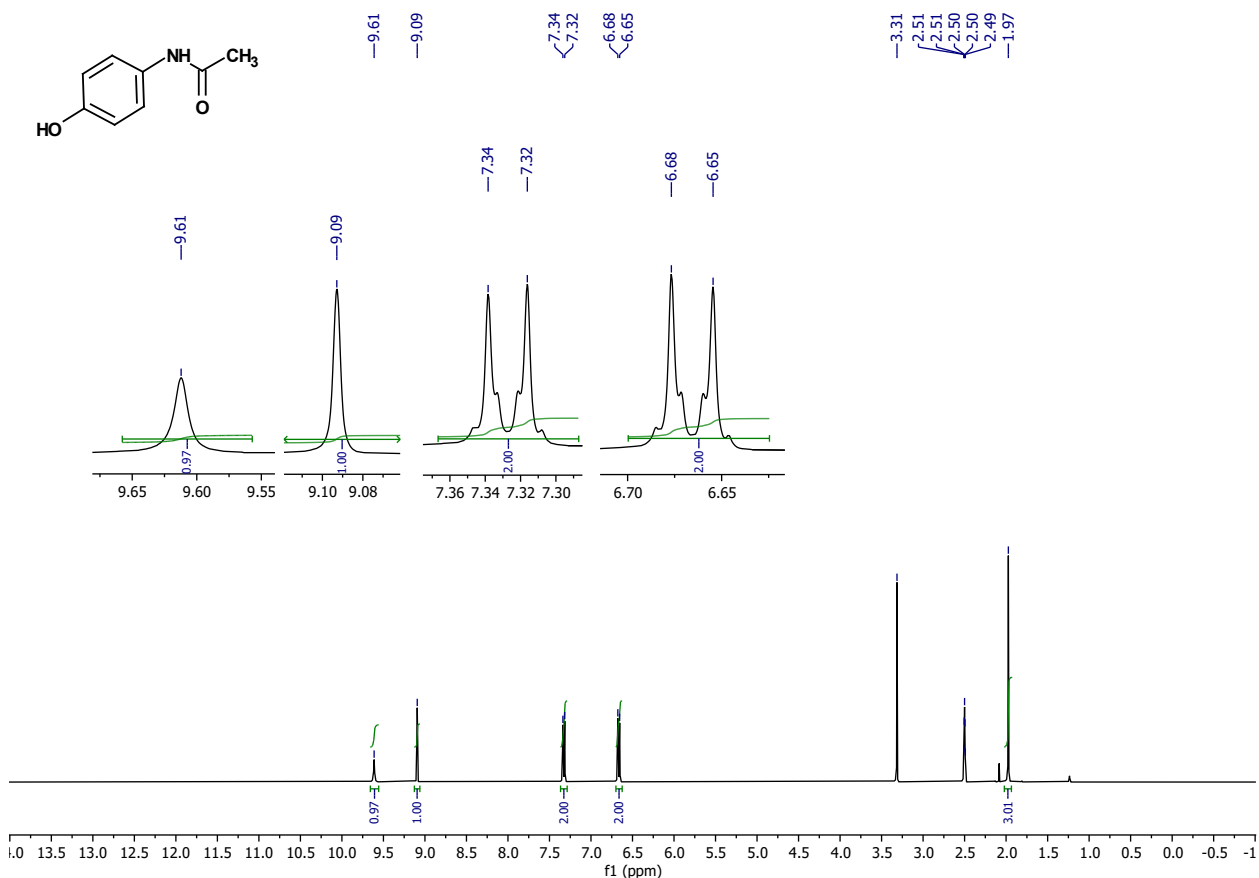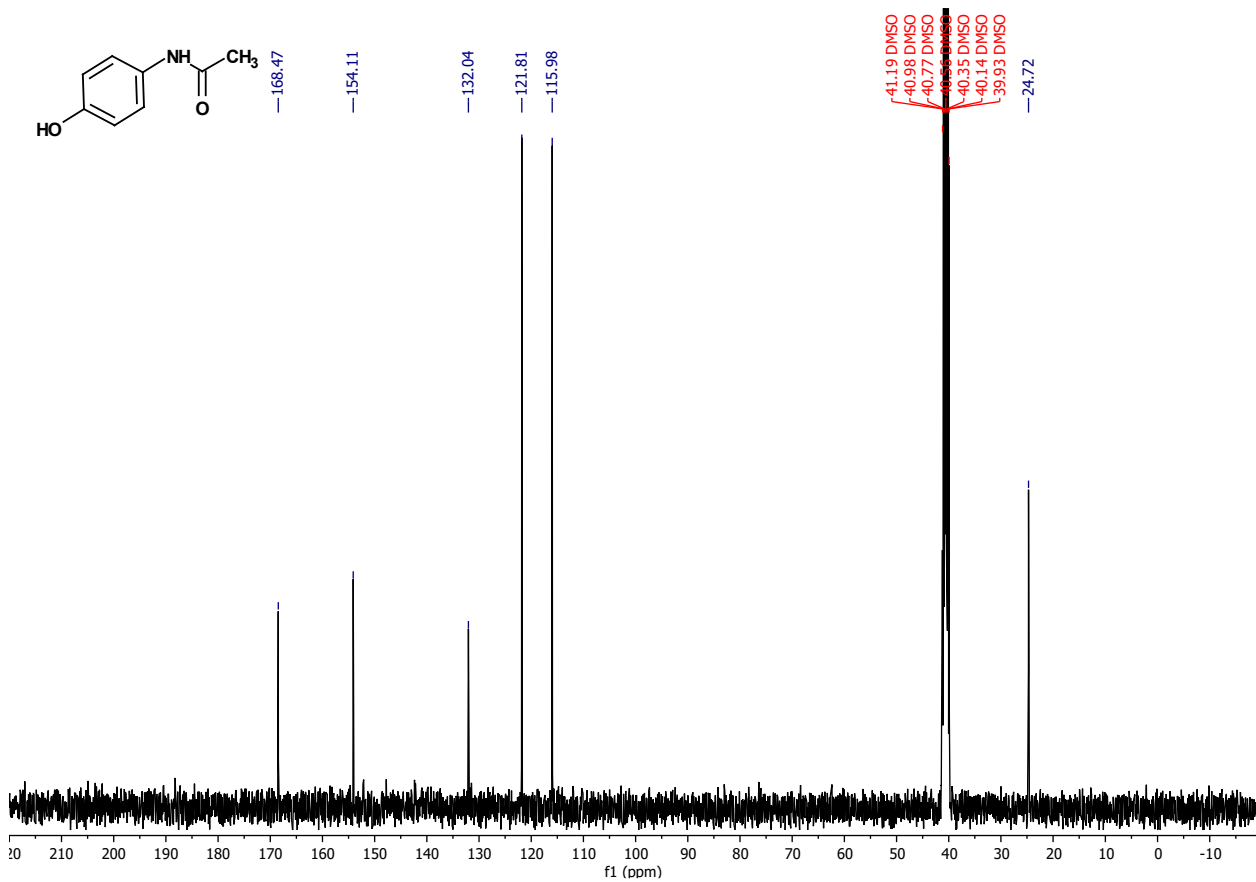

$^1\text{H}$  and  $^{13}\text{C}$  NMR *N*-(4-hydroxy-3,5-dimethylphenyl)acetamide (**2u**)

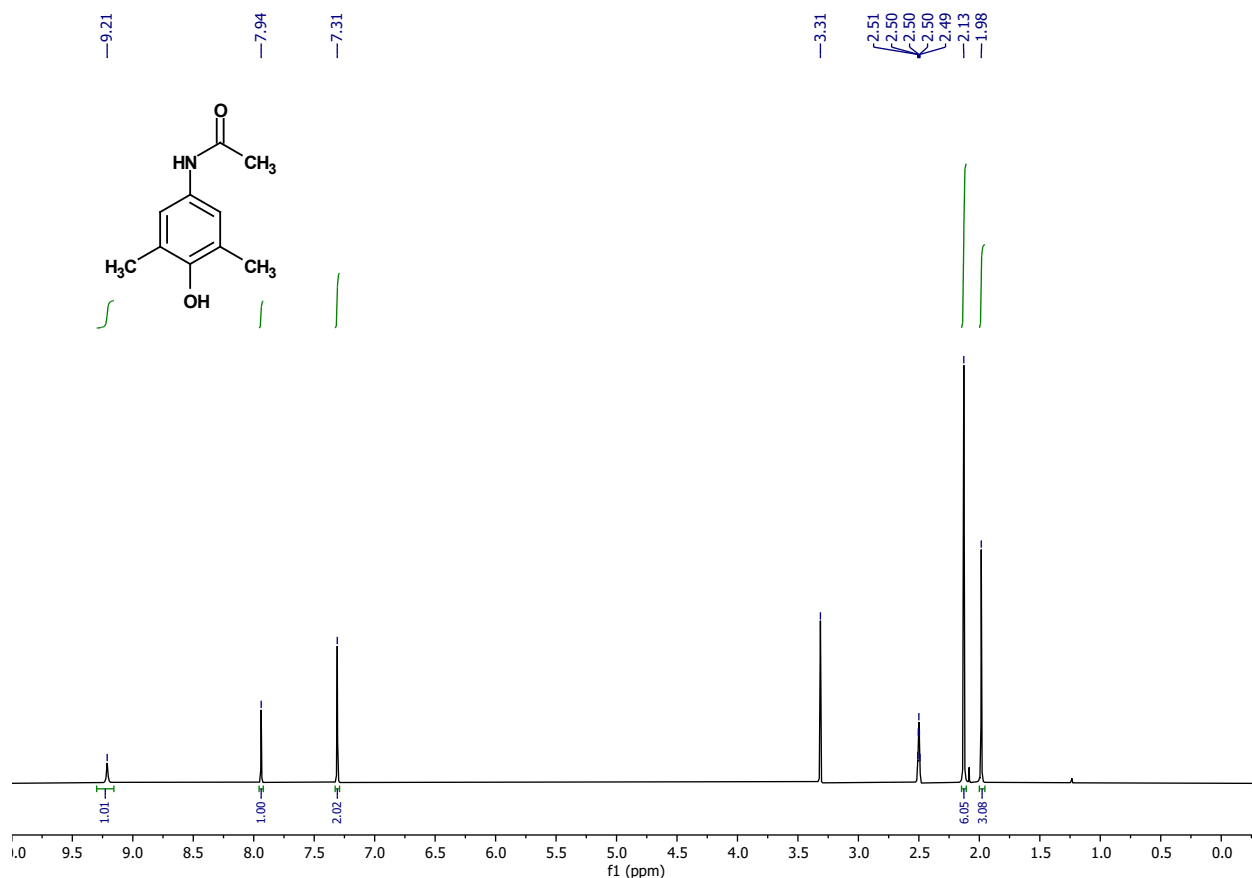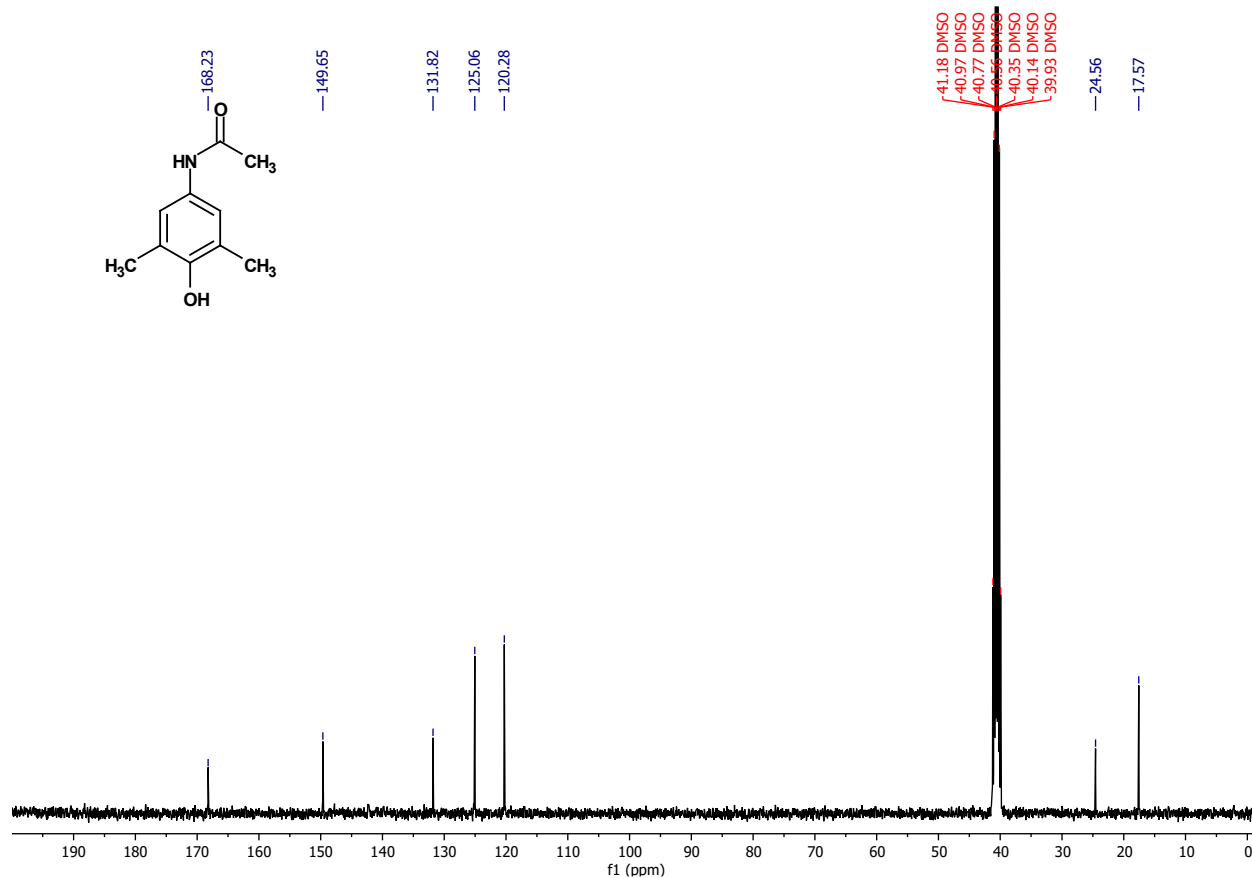

$^1\text{H}$  and  $^{13}\text{C}$  NMR *N*-(4-hydroxy-3-methylphenyl)acetamide (**2v**)

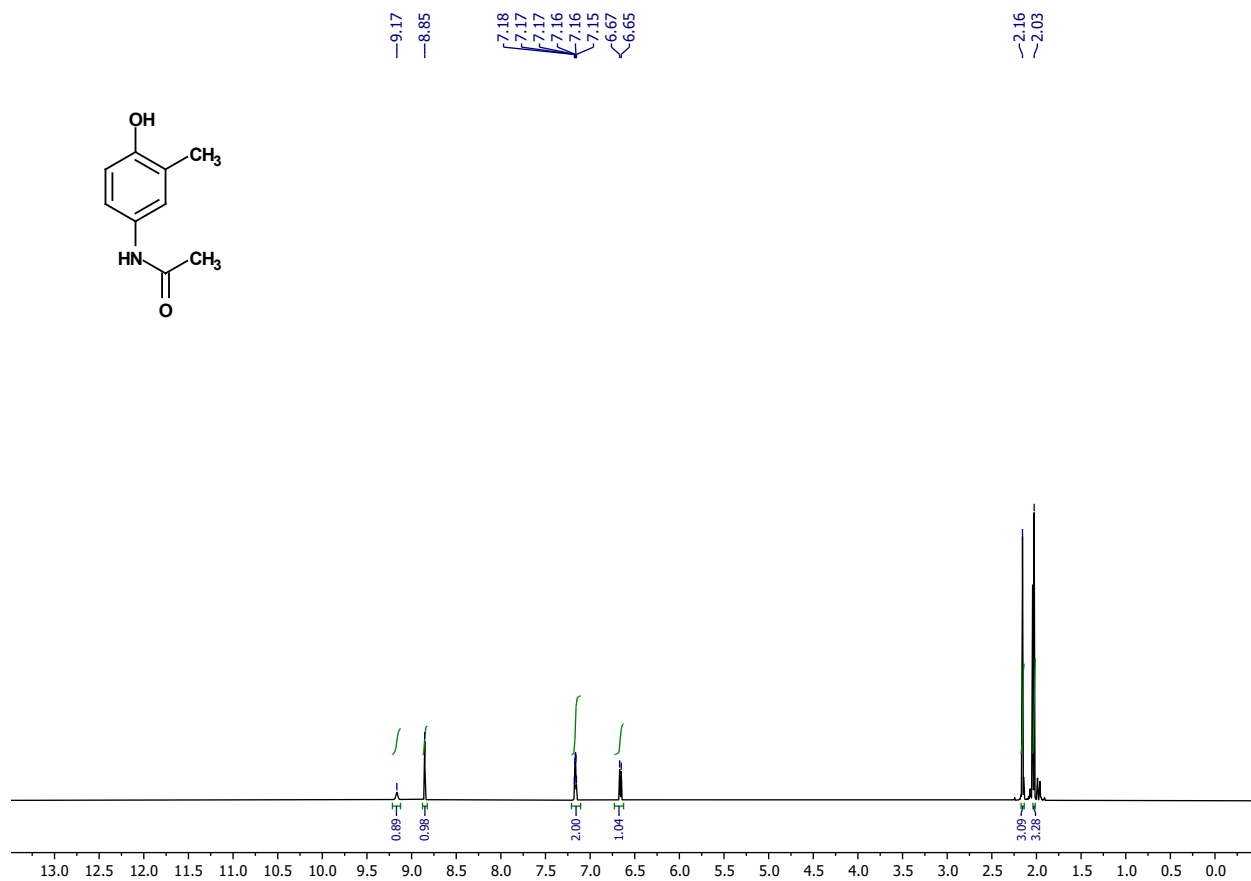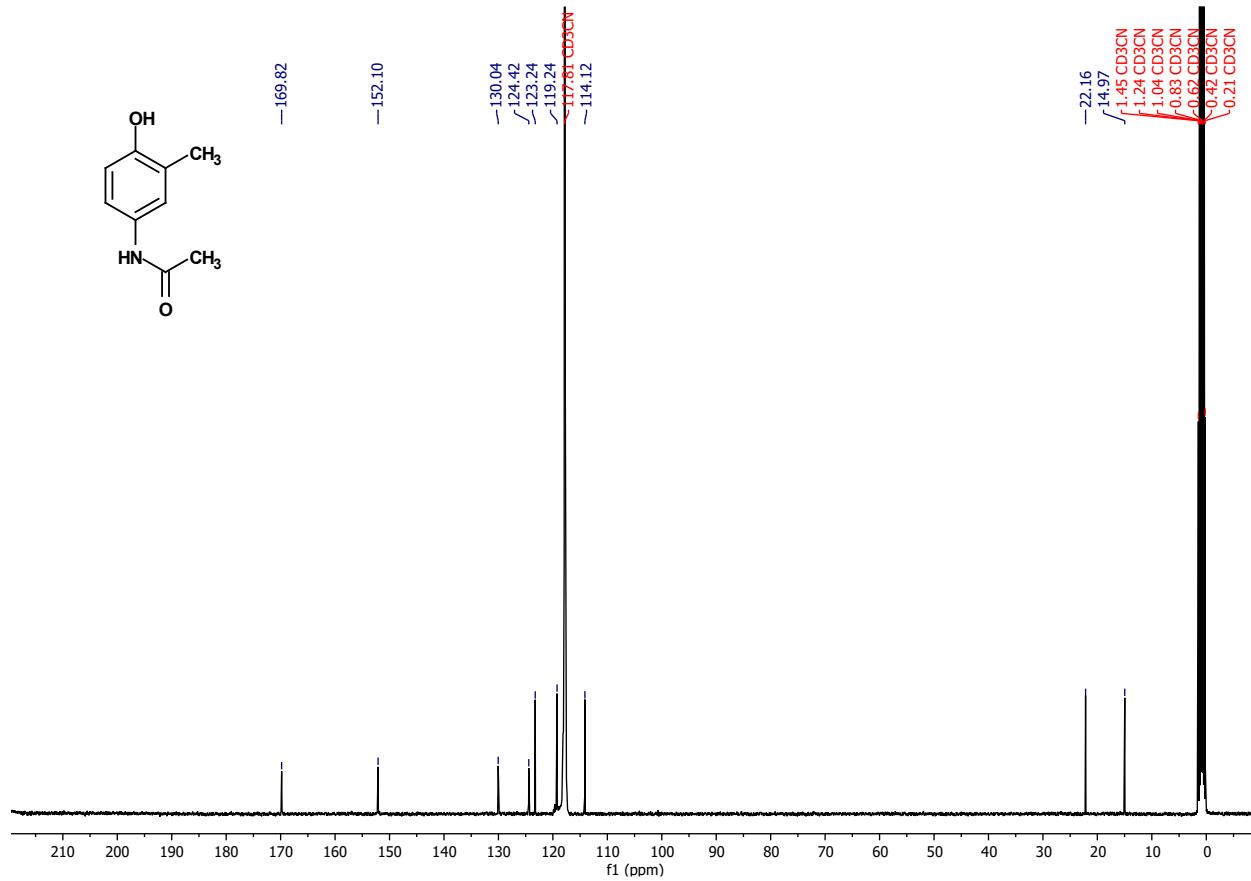

<sup>1</sup>H and <sup>13</sup>C NMR Methyl 5-acetamido-2-hydroxybenzoate (**2w**)

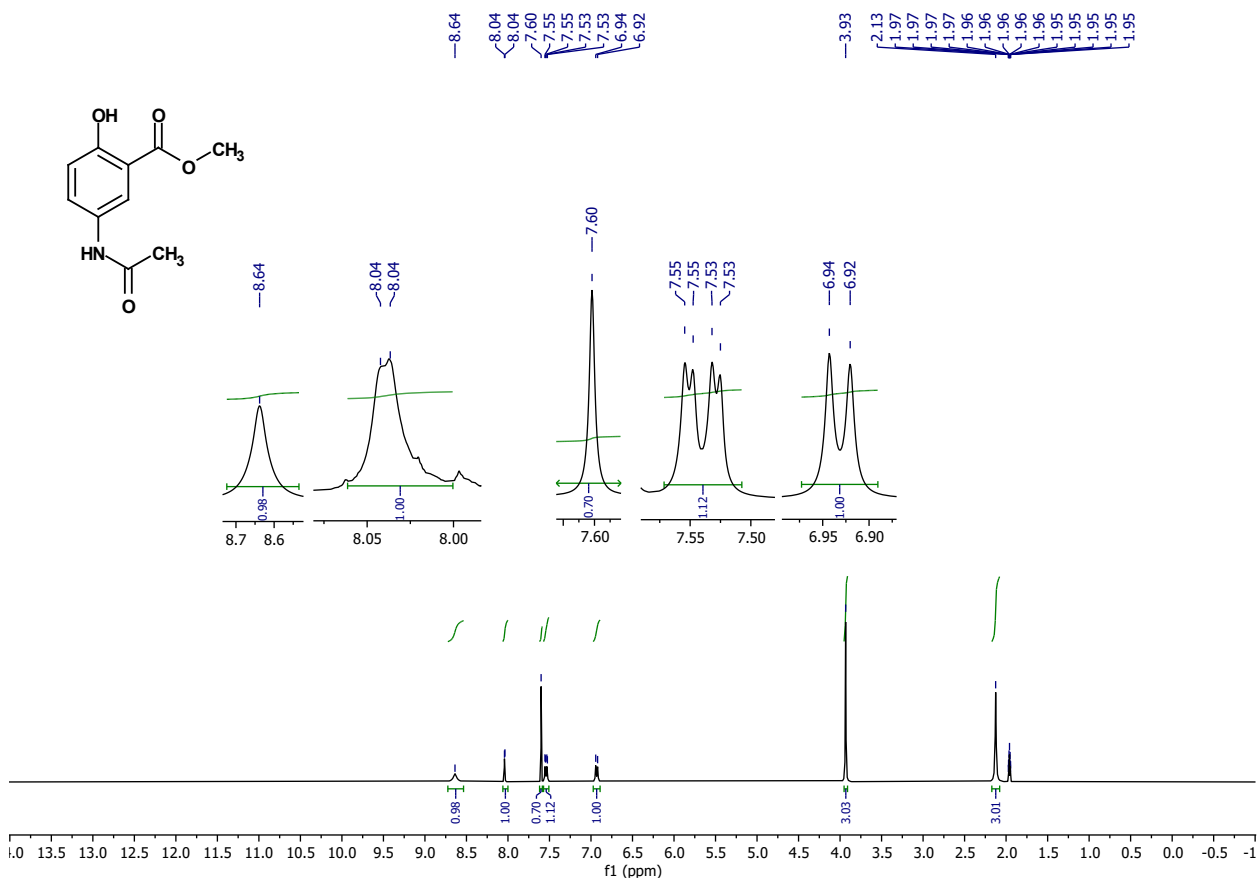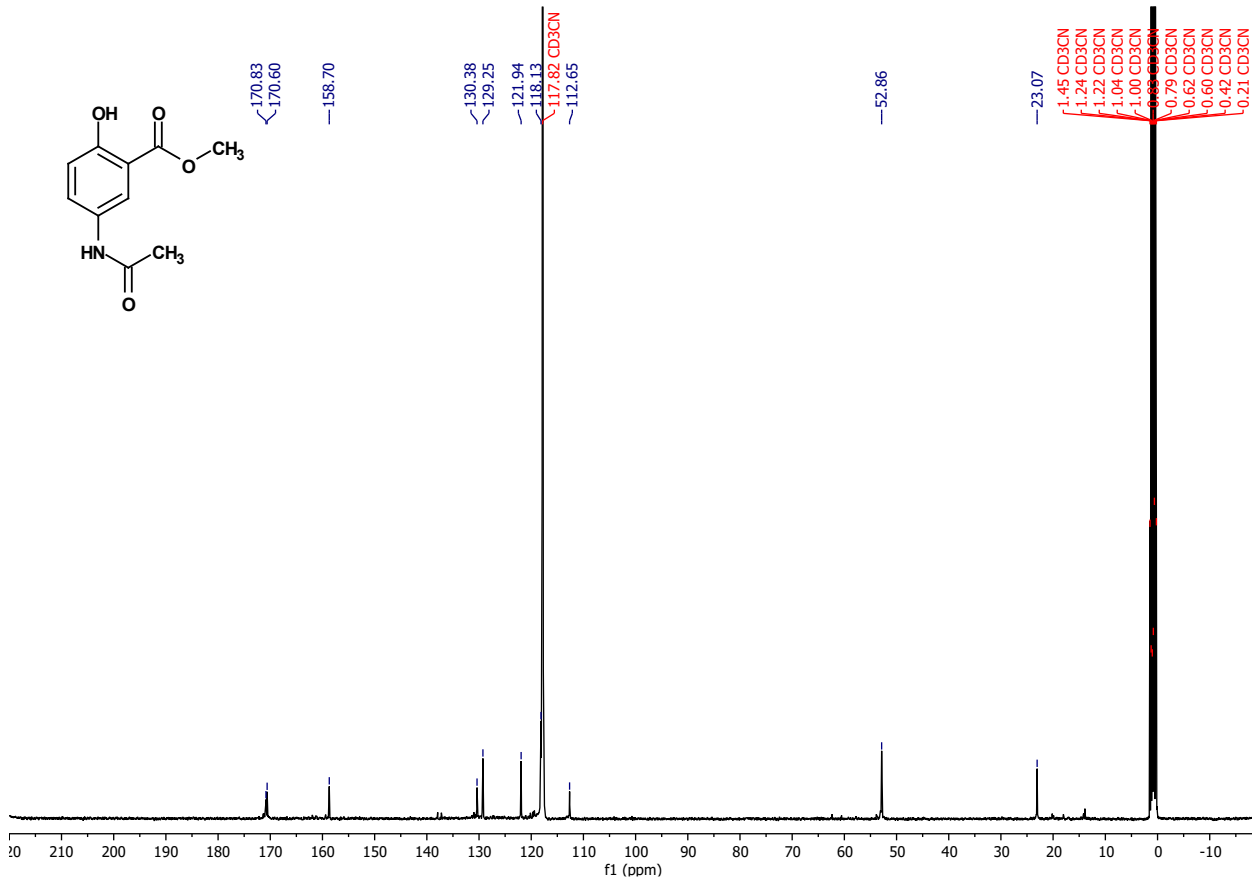

# $^1\text{H}$ and $^{13}\text{C}$ NMR Methyl 2-methylbenzo[d]oxazole-7-carboxylate (**2ww**)

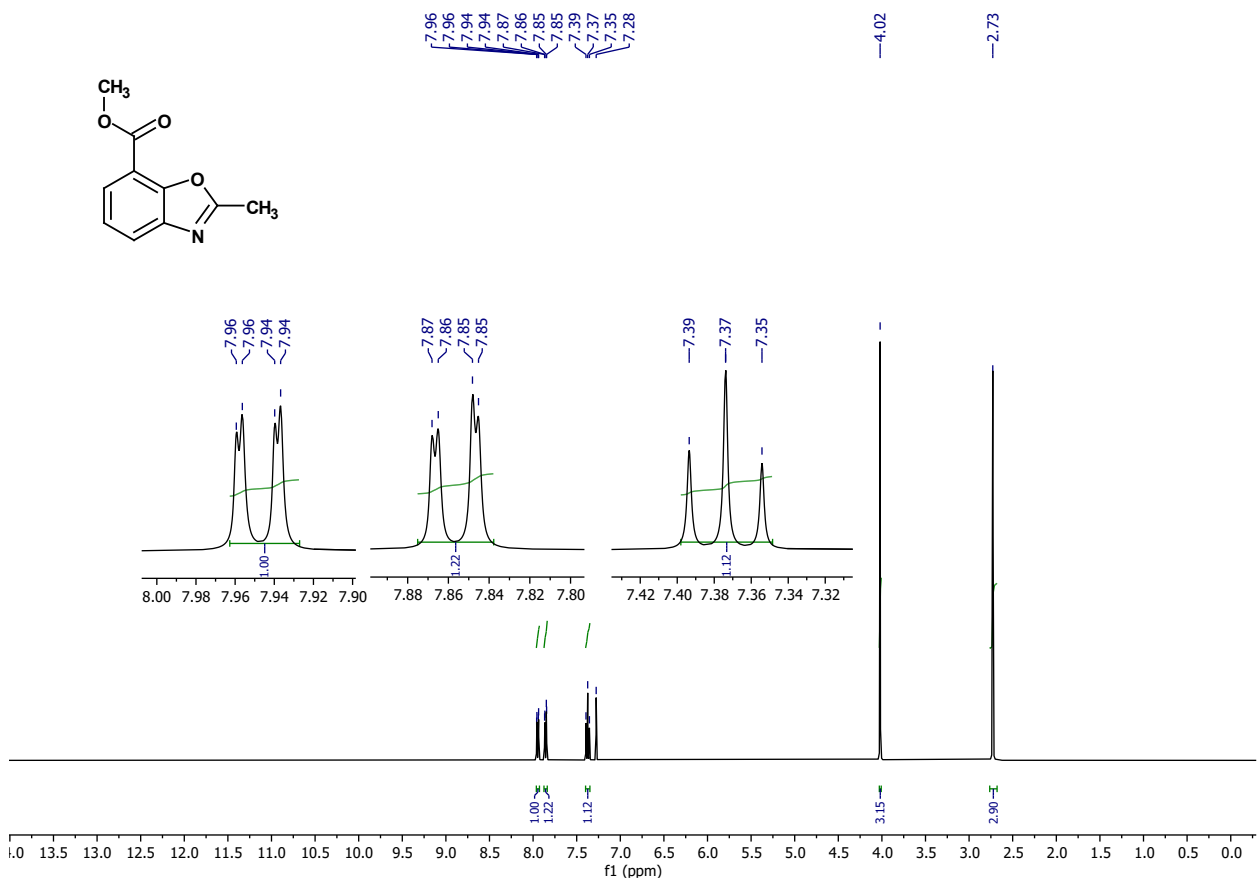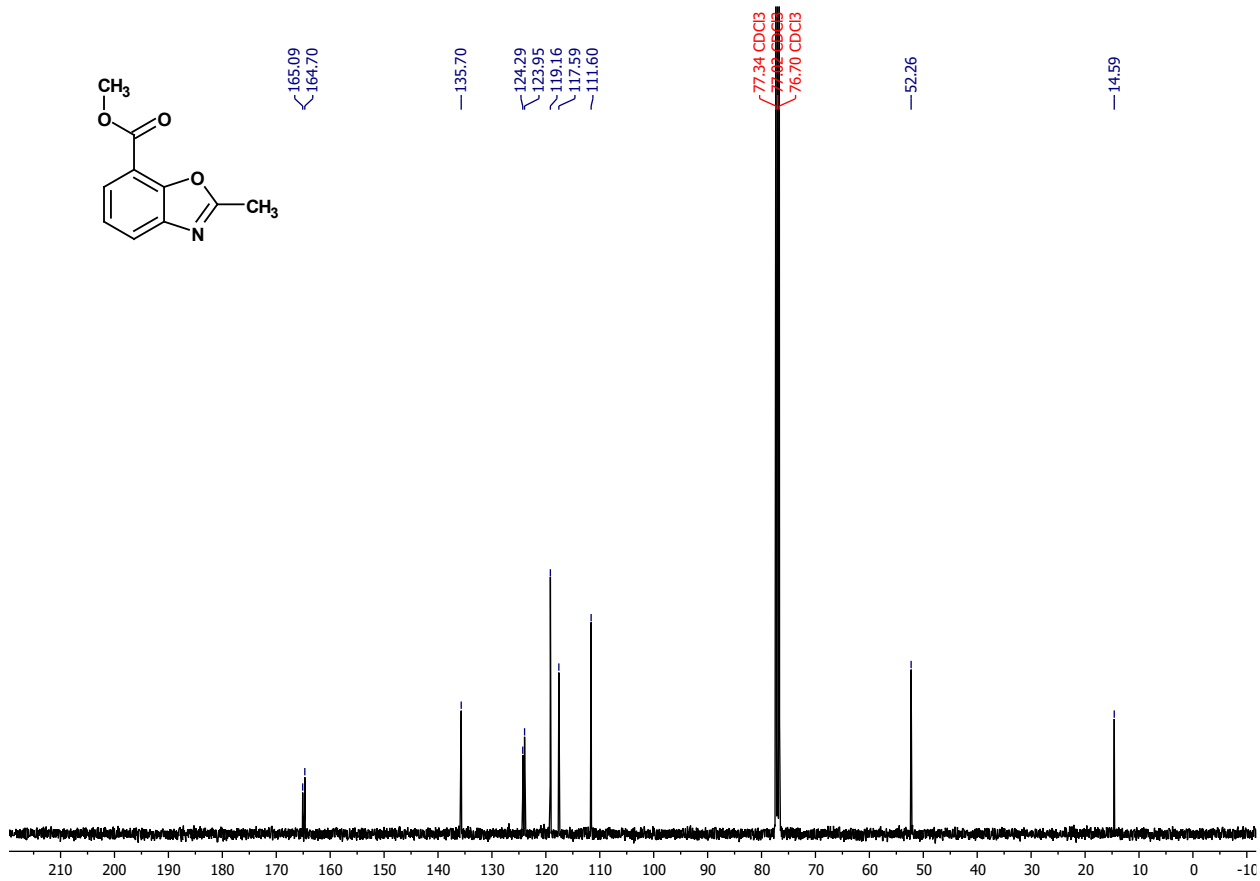

# <sup>1</sup>H and <sup>13</sup>C NMR Ethyl 5-acetamido-2-hydroxybenzoate (2x)

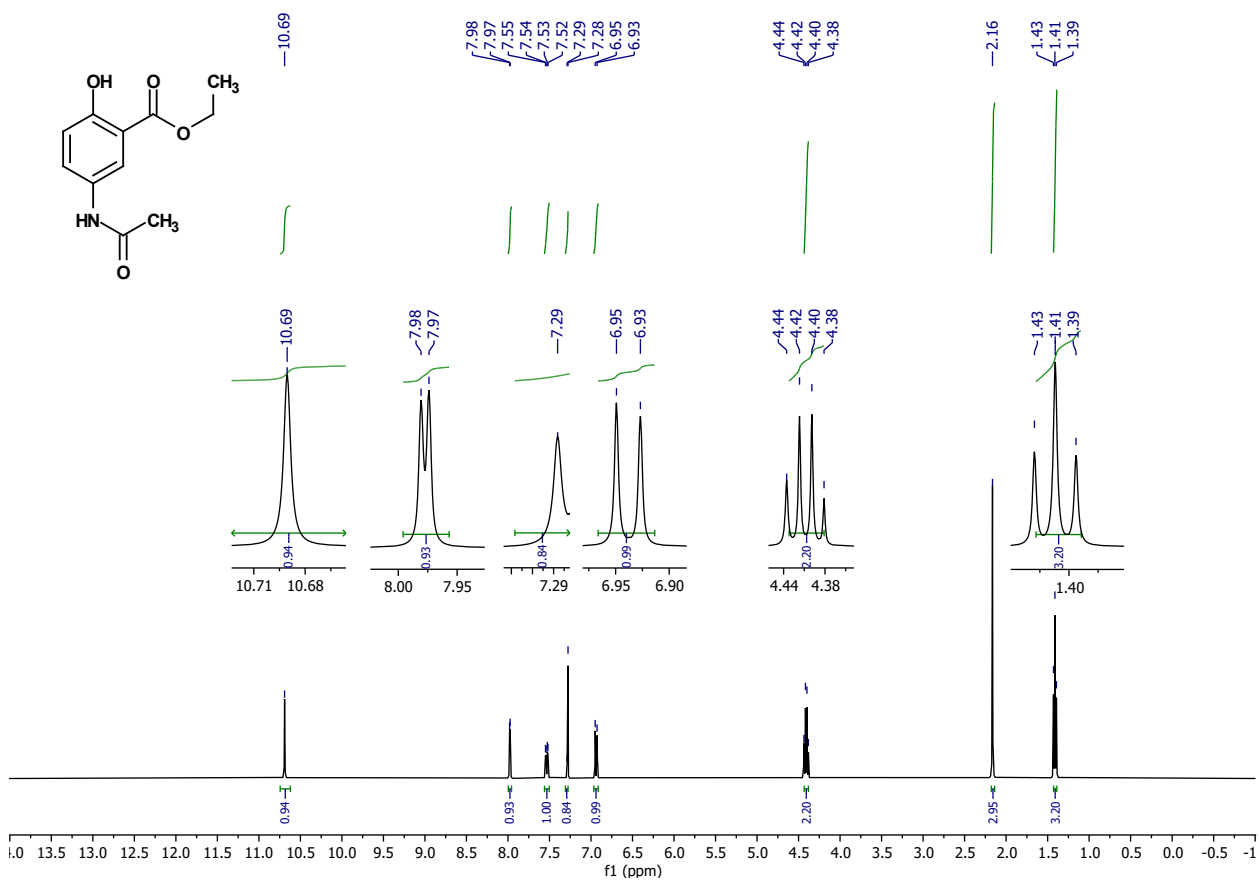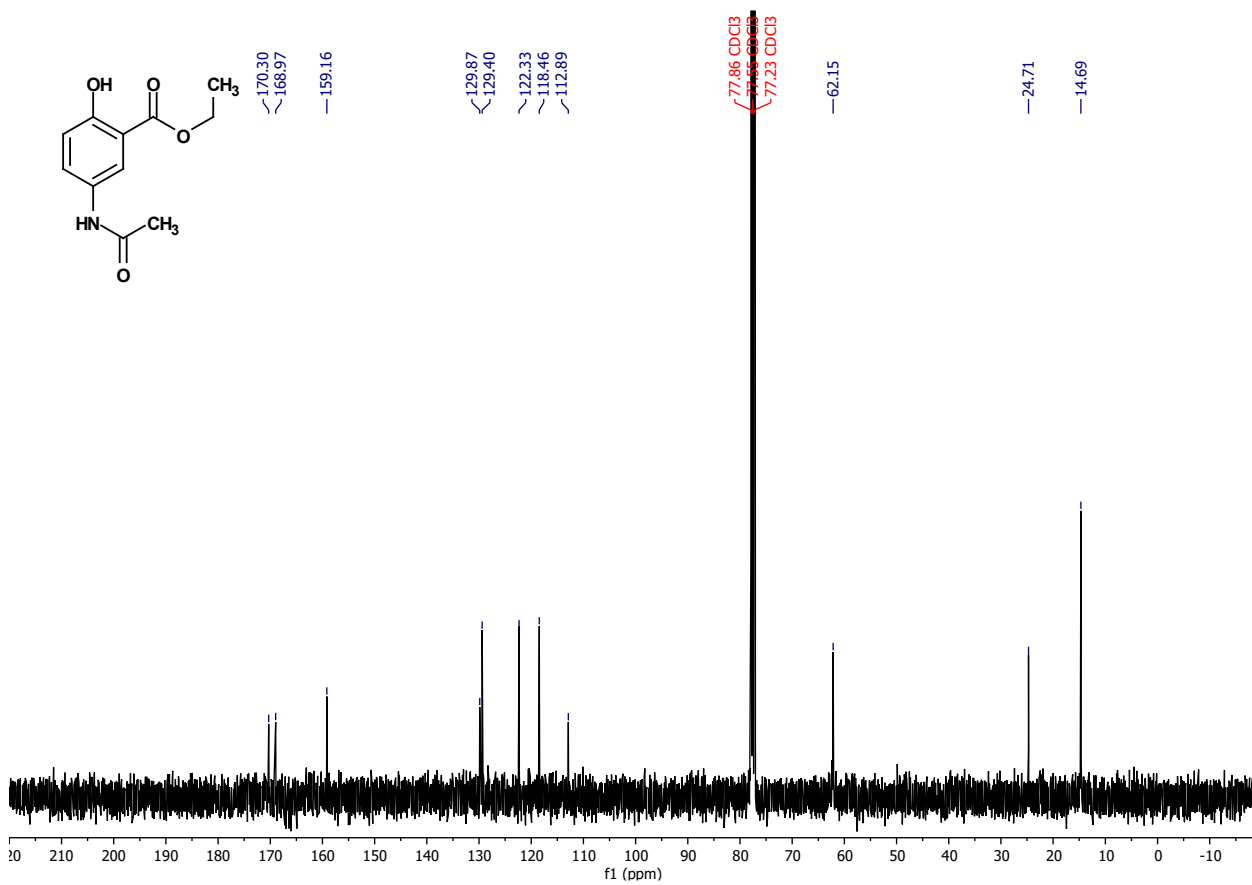

<sup>1</sup>H and <sup>13</sup>C NMR Ethyl 2-methylbenzo[d]oxazole-7-carboxylate (**2xx**)

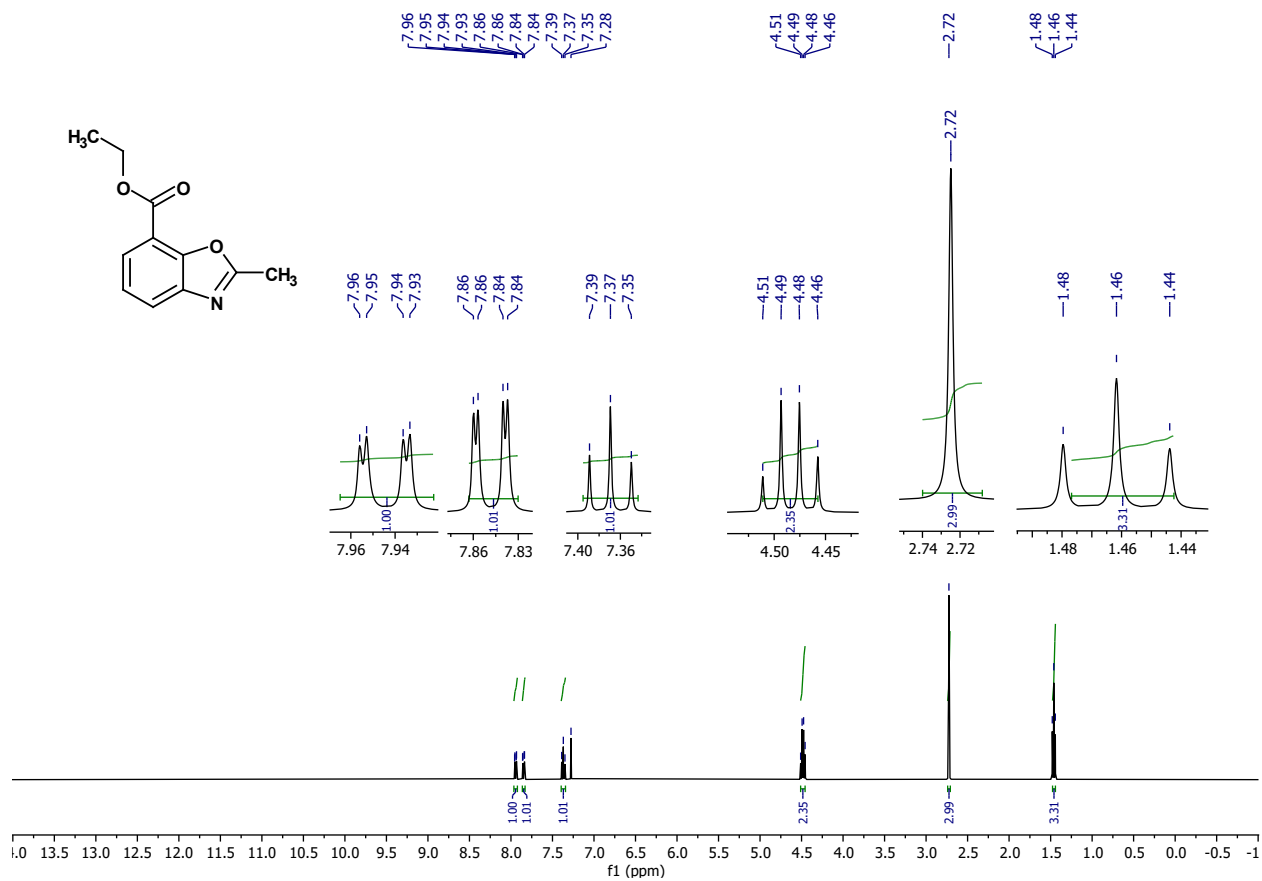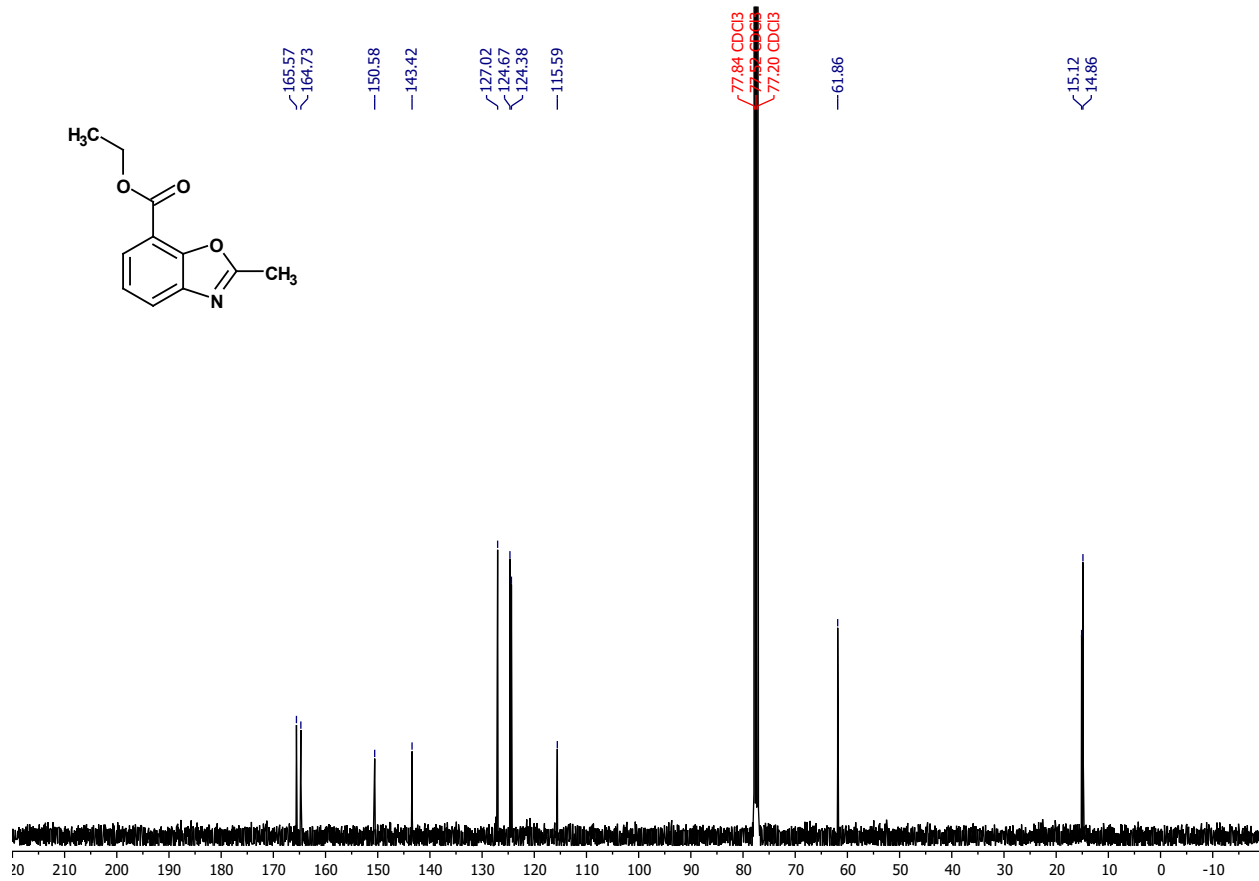

$^1\text{H}$  and  $^{13}\text{C}$  NMR *N*-(2,5-bis(trifluoromethyl)phenyl)propionamide (**3a**)

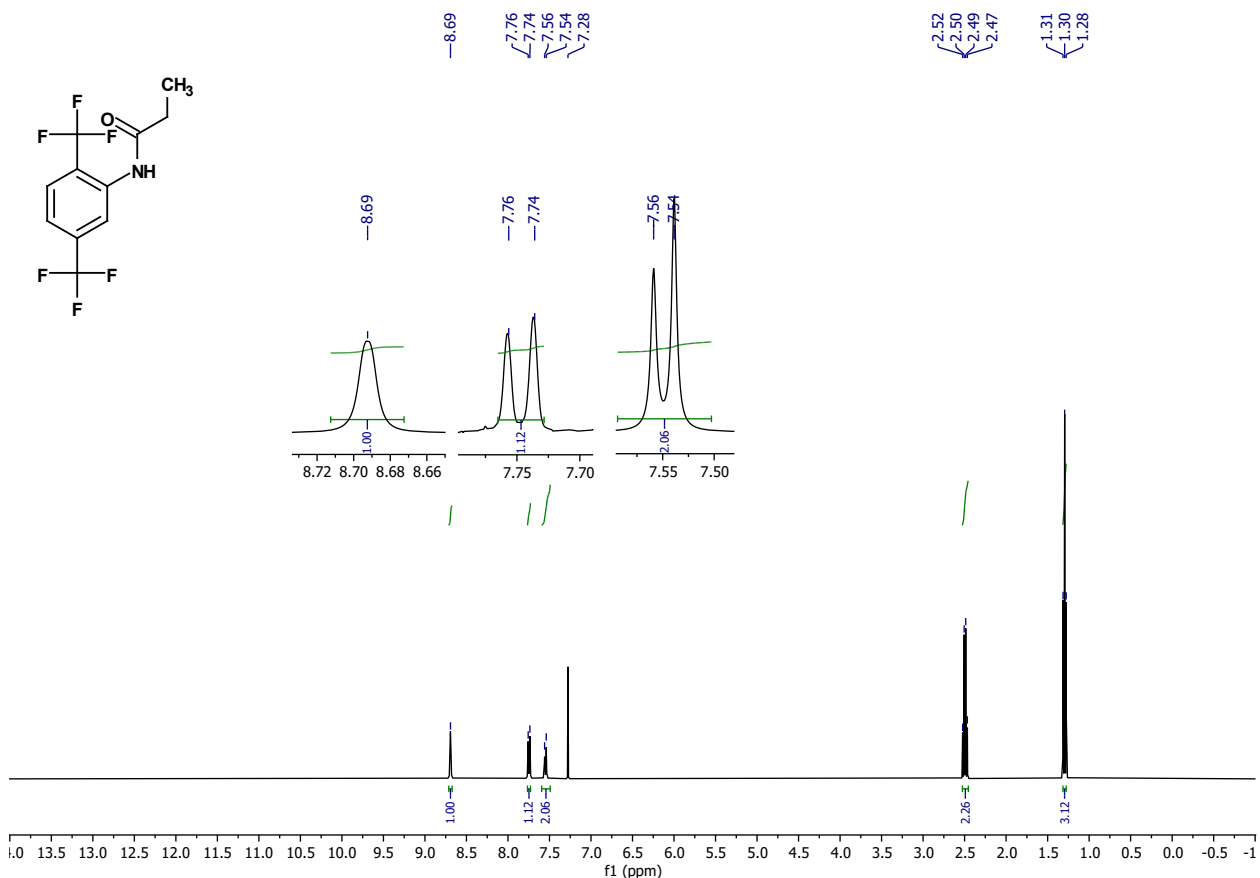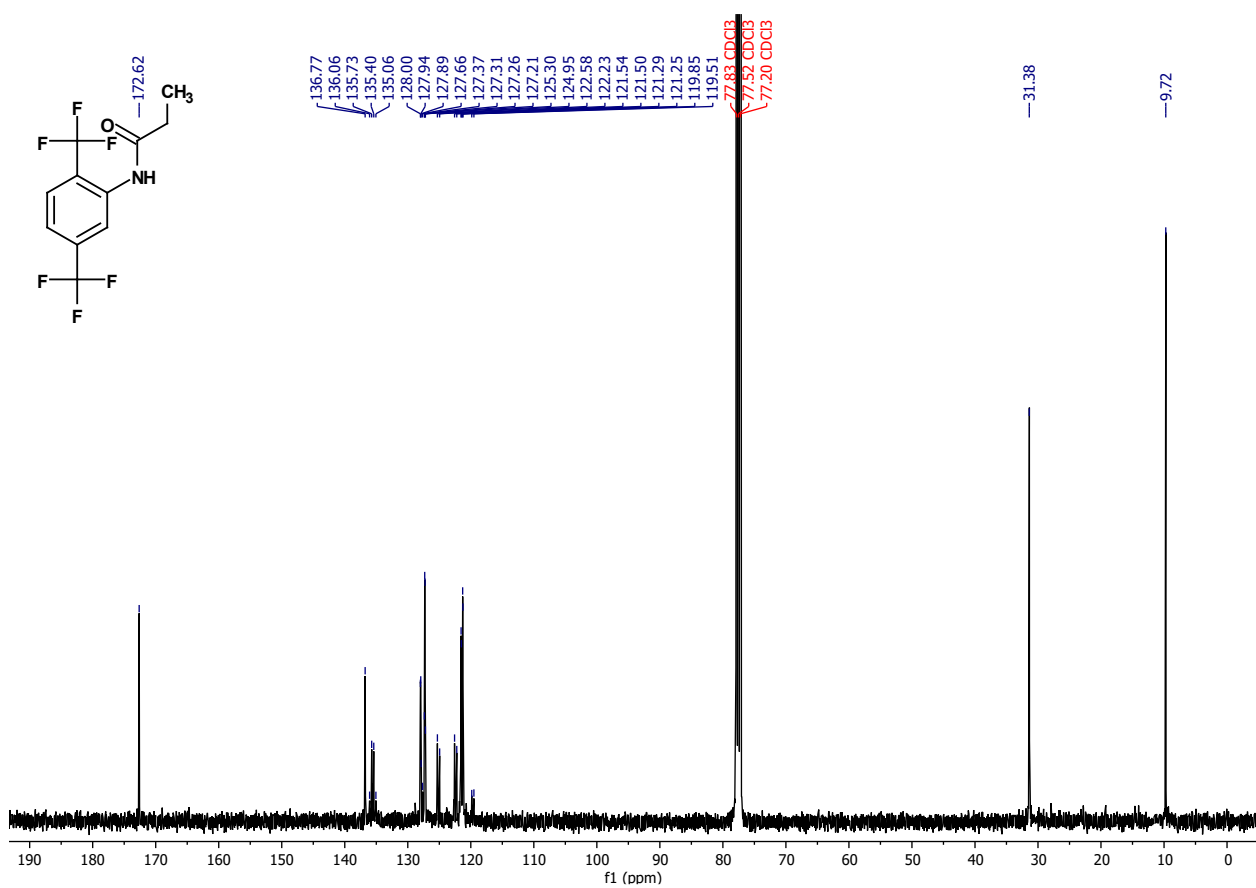



$^{19}\text{F}$  NMR *N*-(2,5-bis(trifluoromethyl)phenyl)propionamide (**3a**)

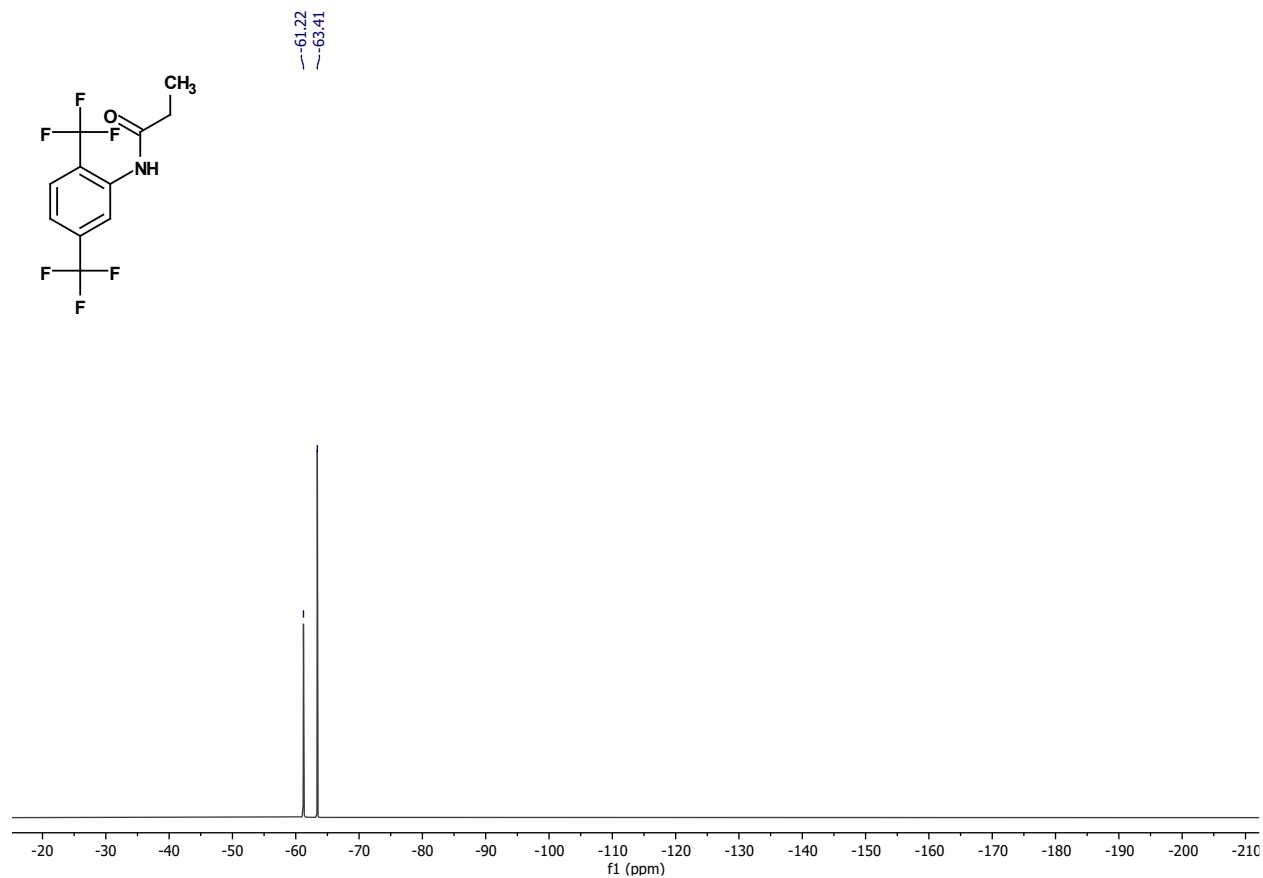

$^1\text{H}$  and  $^{13}\text{C}$  NMR *N*-(2,6-bis(trifluoromethyl)phenyl)propionamide (**3b**)

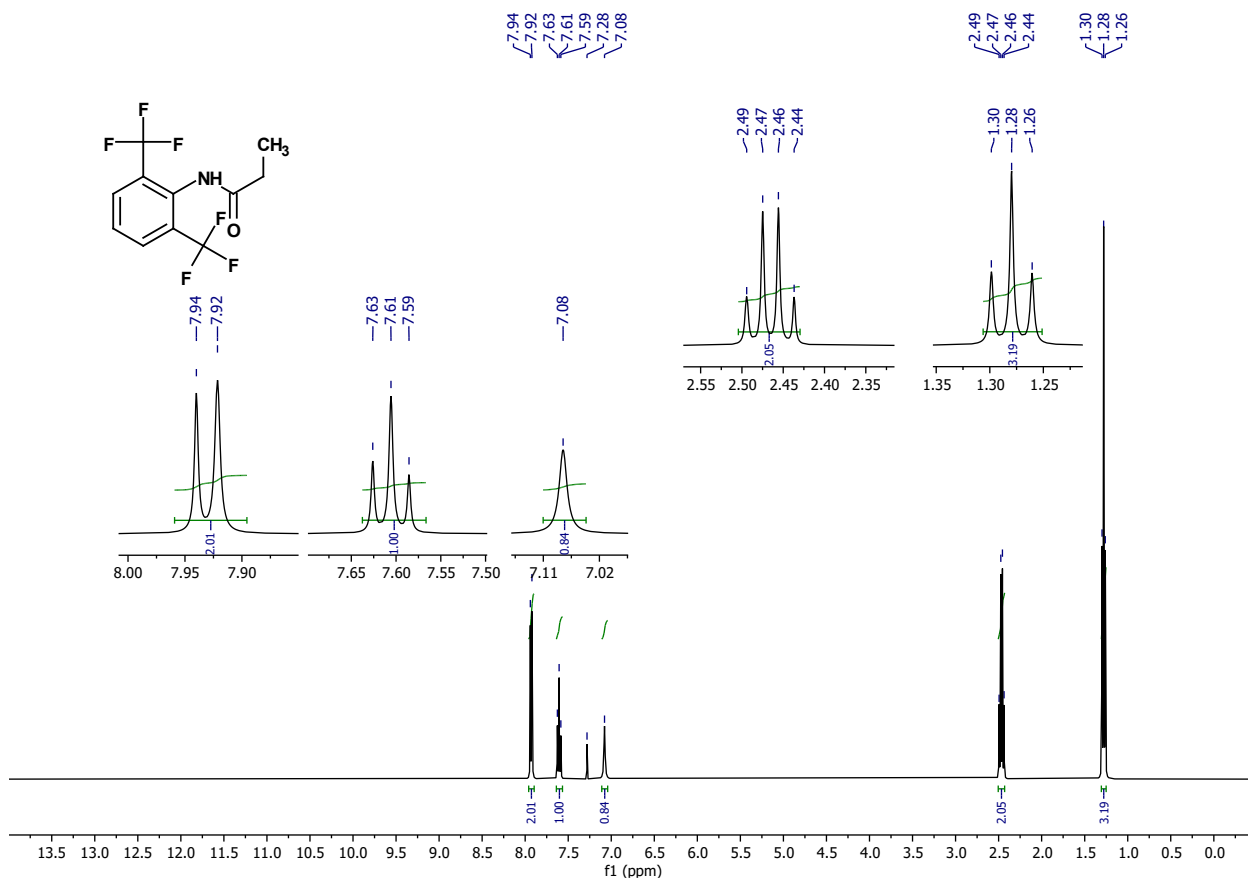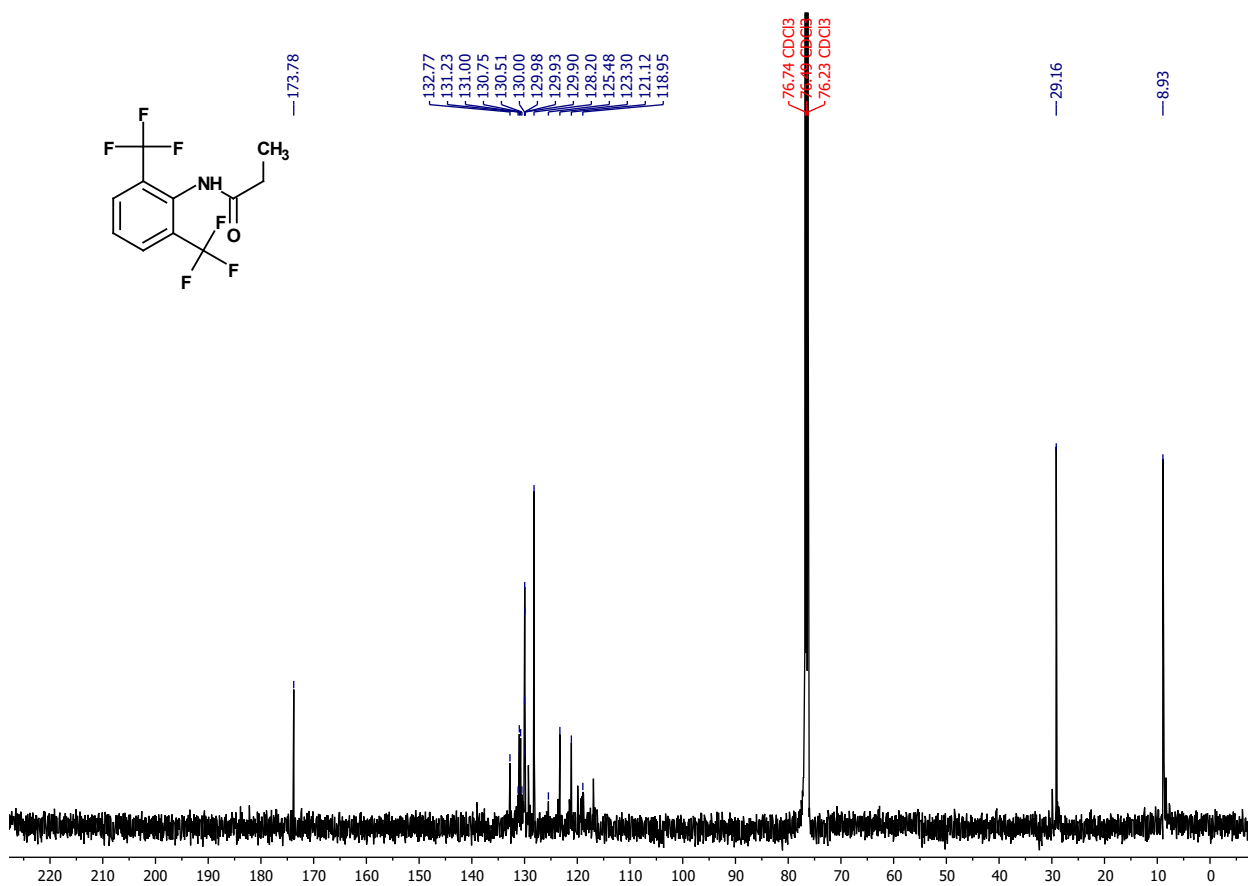

$^{19}\text{F}$  NMR *N*-(2,6-bis(trifluoromethyl)phenyl)propionamide (**3b**)

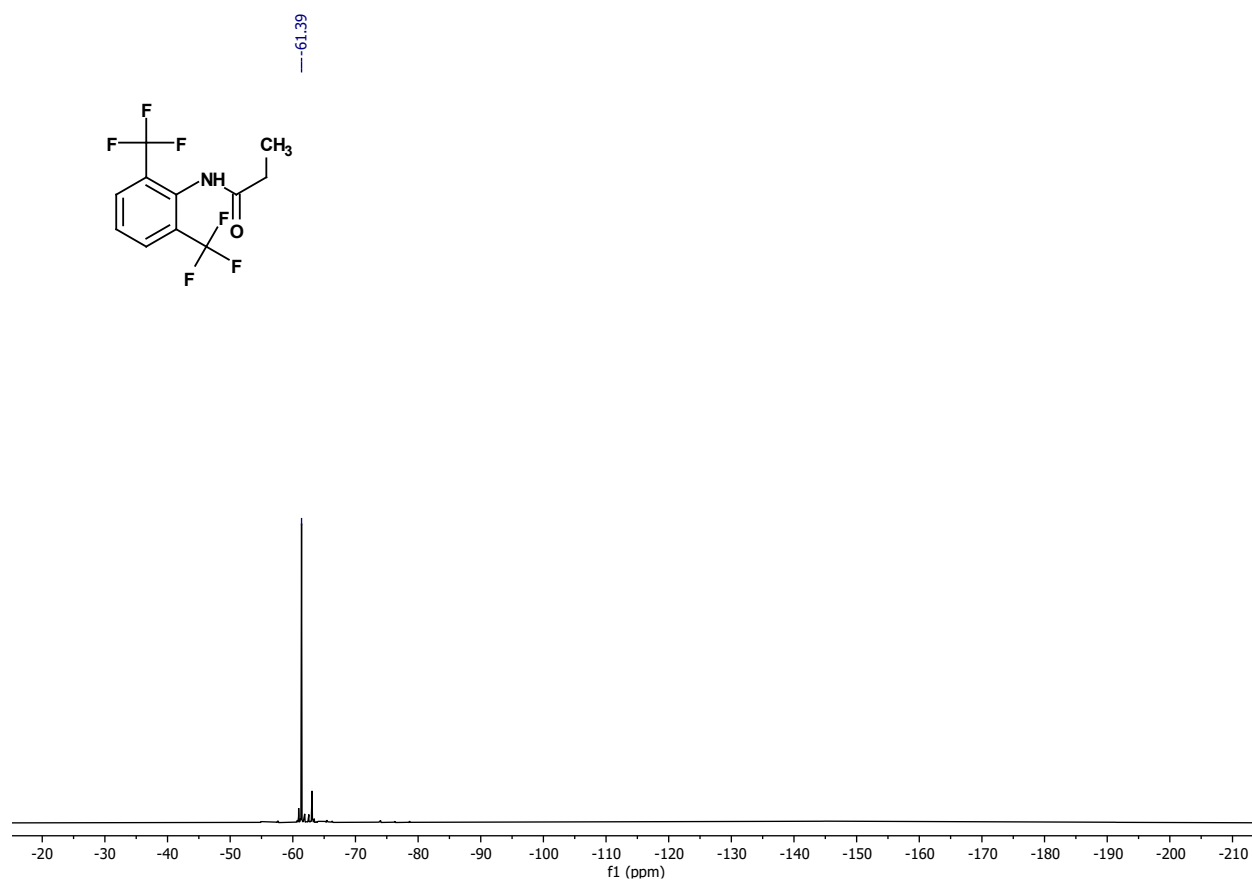

**COSY** NMR *N*-(2,6-bis(trifluoromethyl)phenyl)propionamide (**3b**)

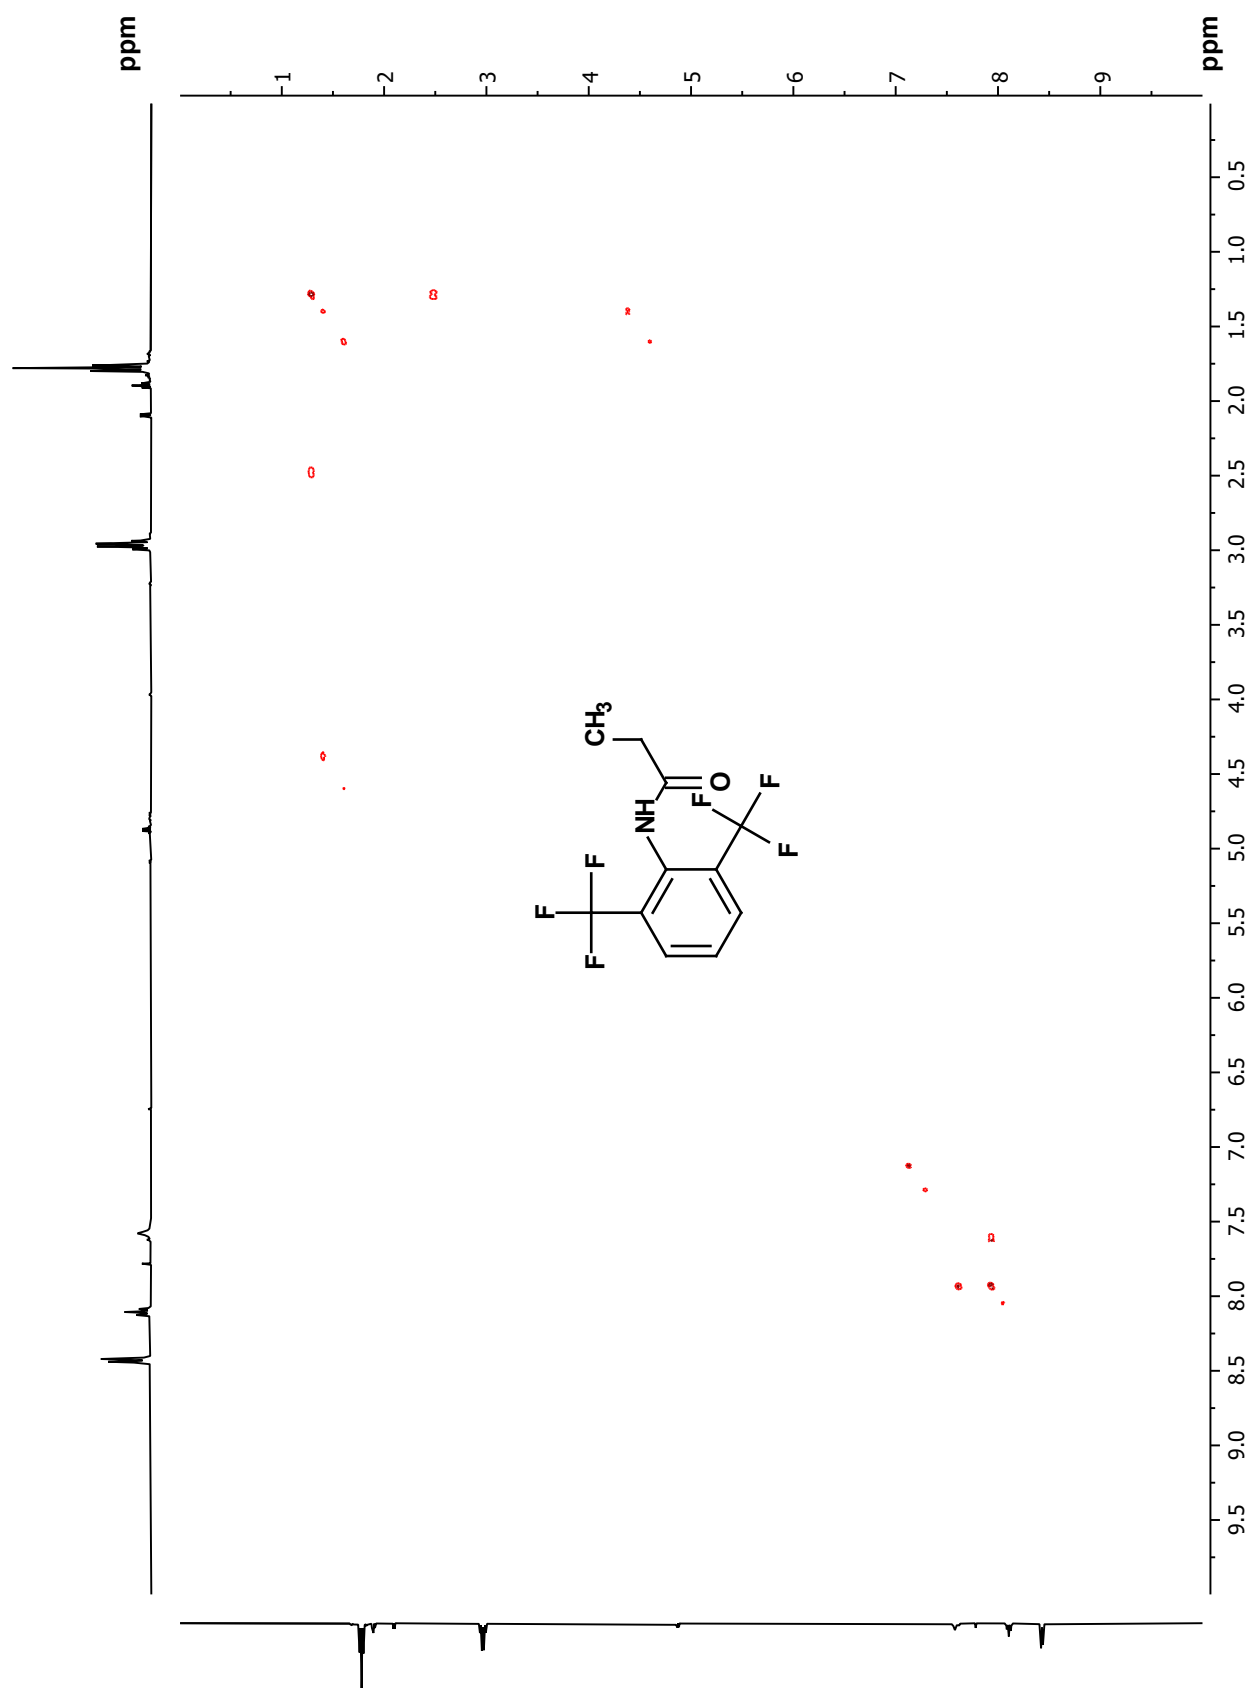

HSQC NMR *N*-(2,6-bis(trifluoromethyl)phenyl)propionamide (**3b**)

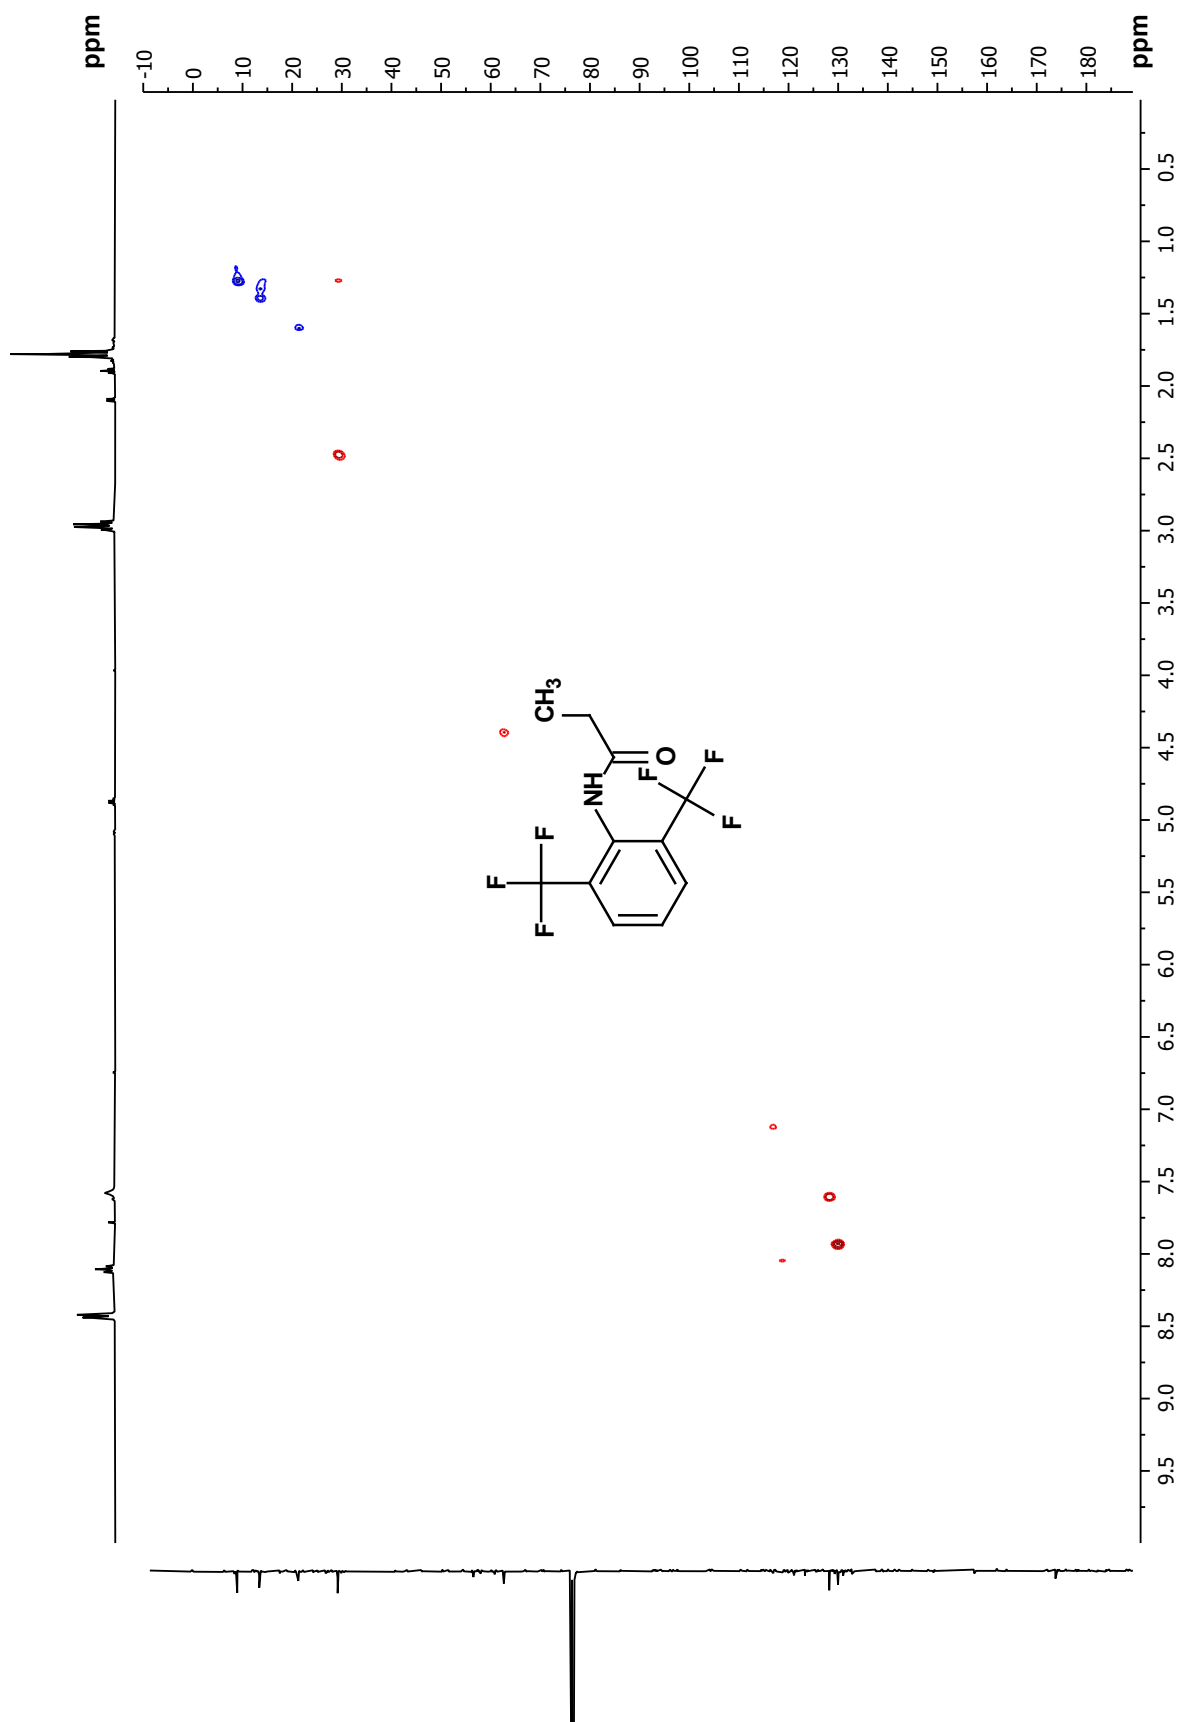

**HMBC** NMR *N*-(2,6-bis(trifluoromethyl)phenyl)propionamide (**3b**)

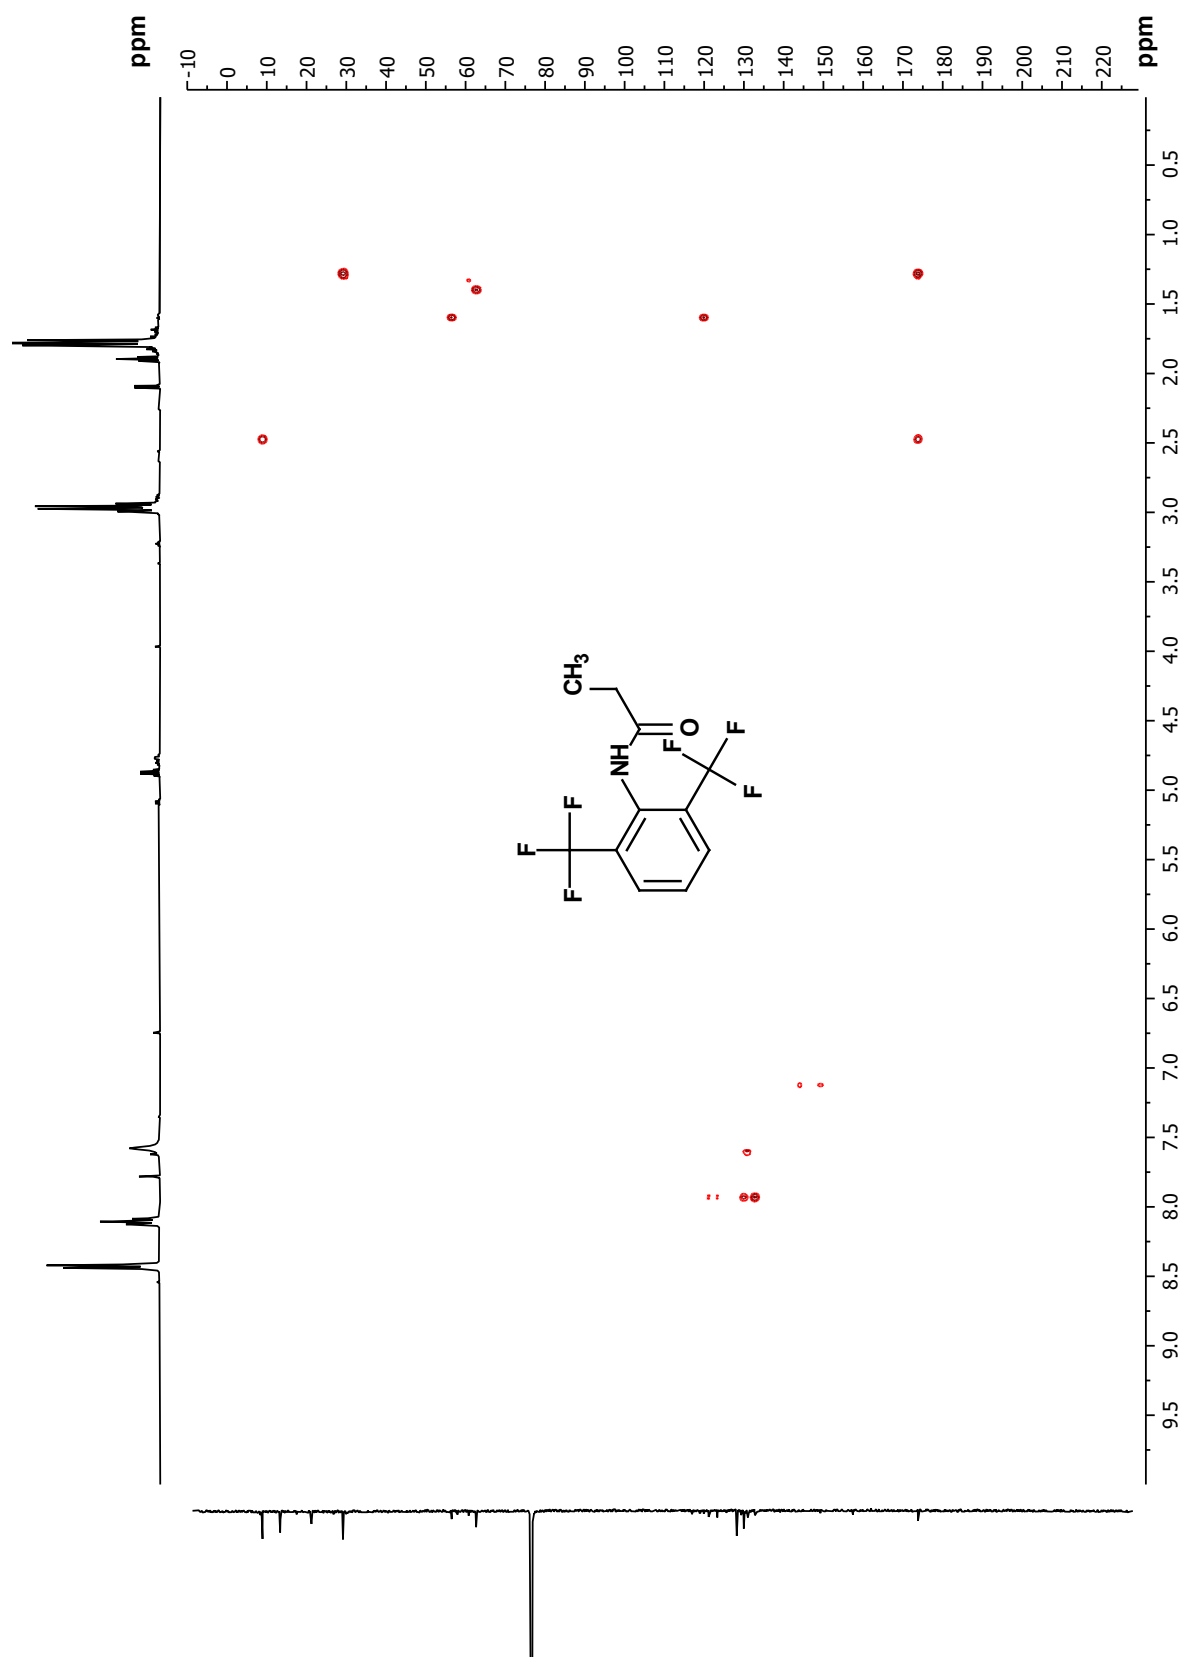

$^1\text{H}$  and  $^{13}\text{C}$  NMR *N*-(2,4,6-tris(trifluoromethyl)phenyl)propionamide (**3c**)

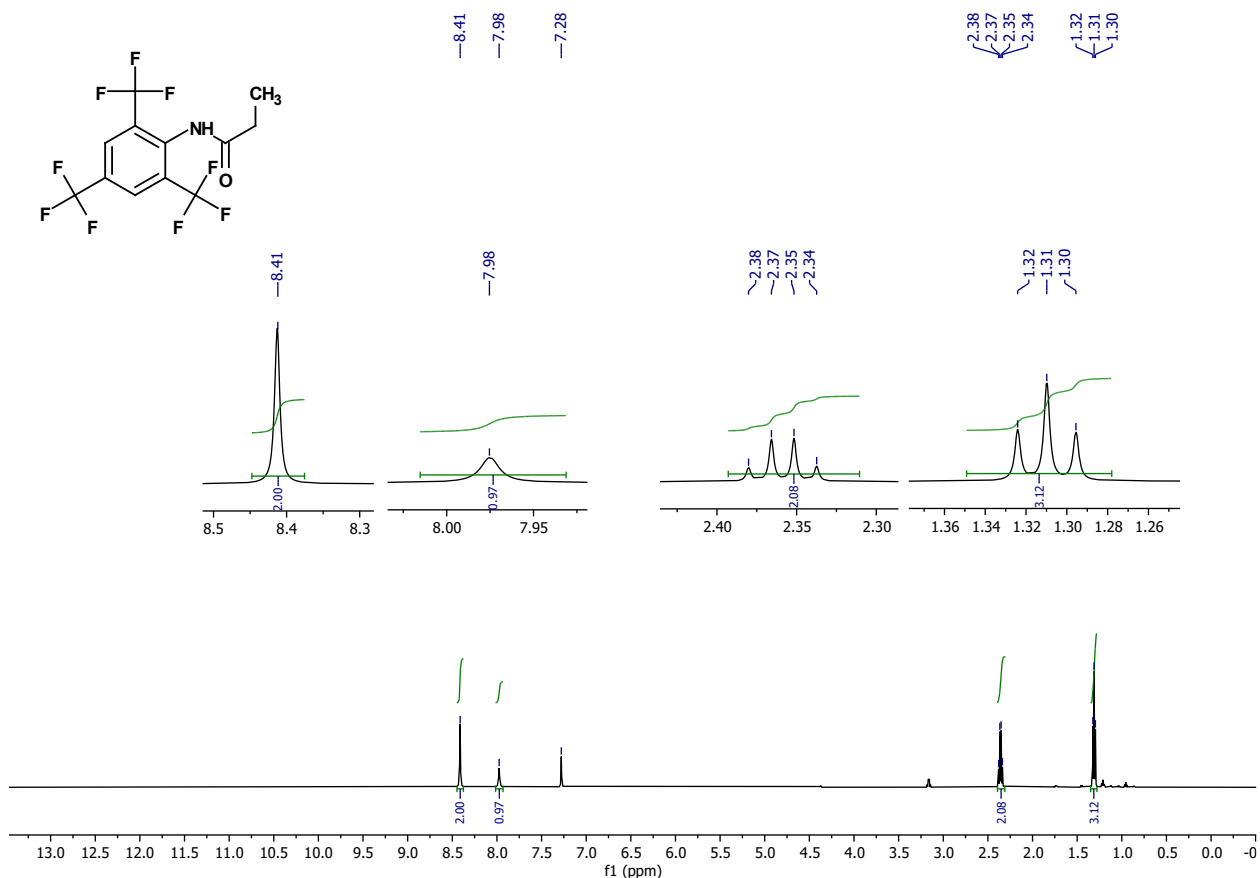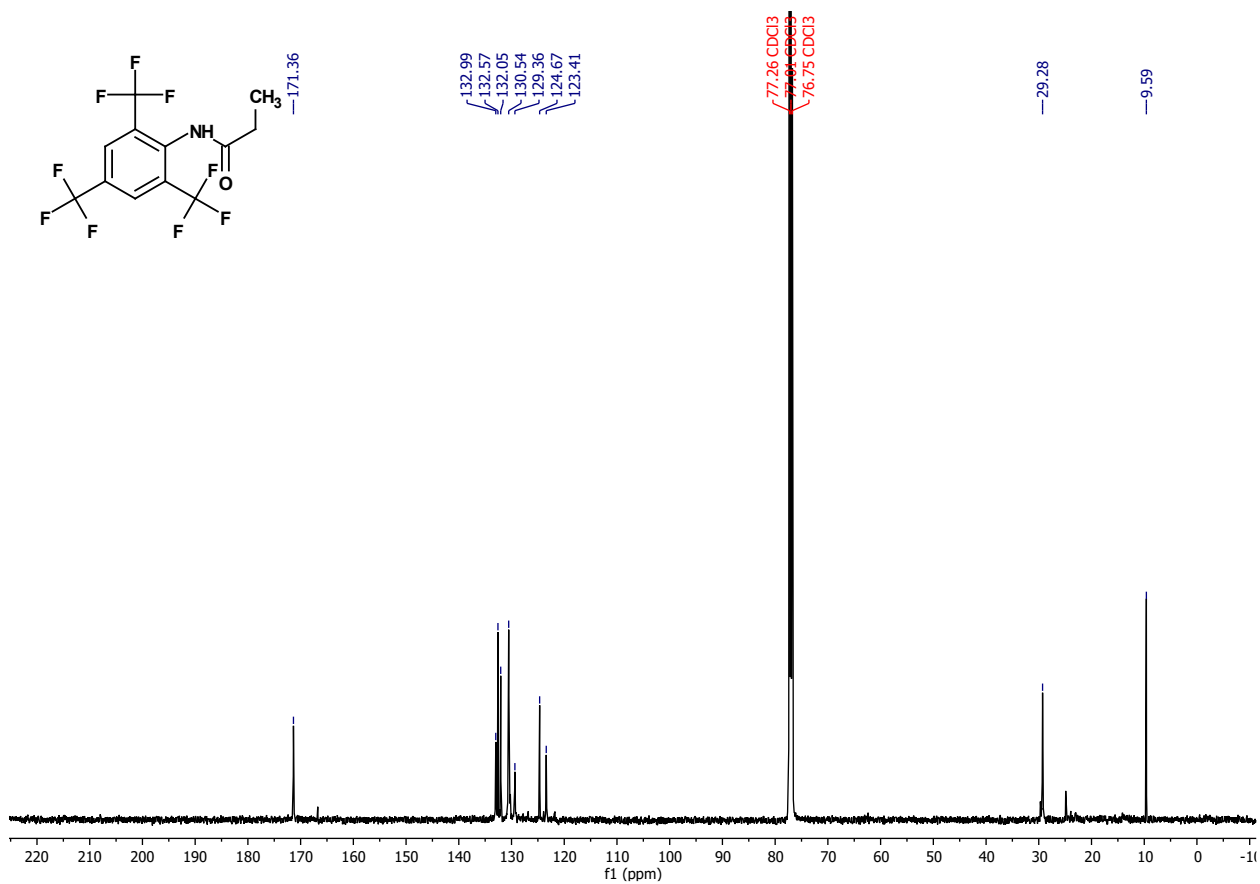

$^{19}\text{F}$  NMR *N*-(2,4,6-tris(trifluoromethyl)phenyl)propionamide (**3c**)

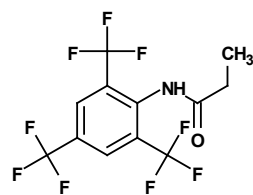

60.77  
62.41

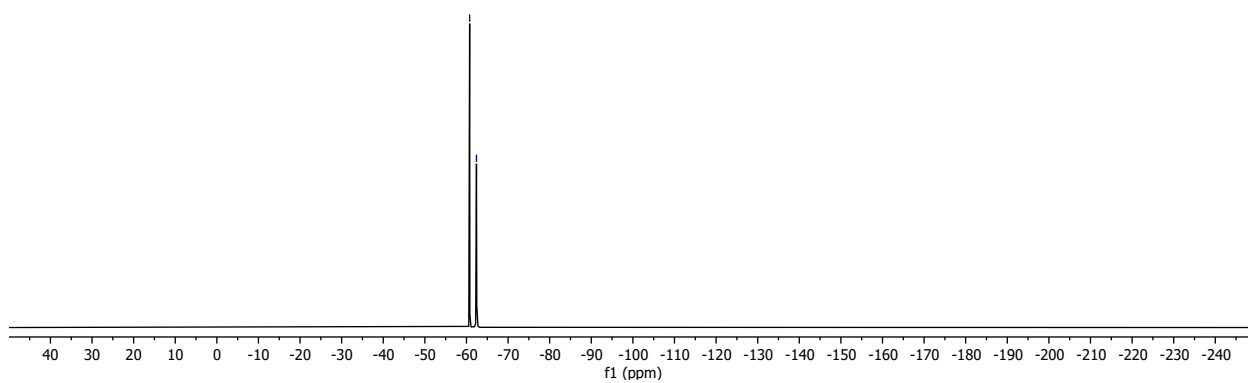



$^1\text{H}$  and  $^{13}\text{C}$  NMR *N*-(2-(trifluoromethyl)phenyl)propionamide (**3d-a**)

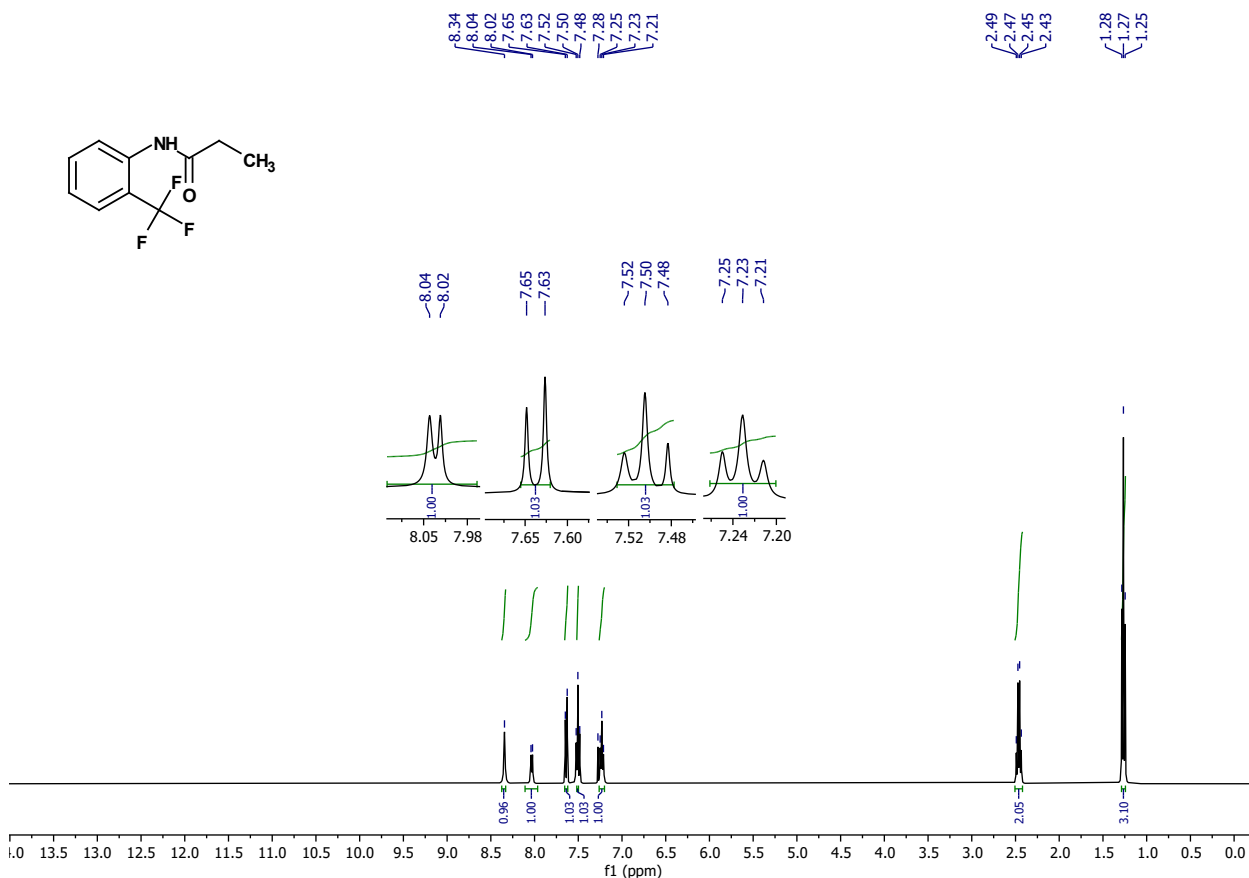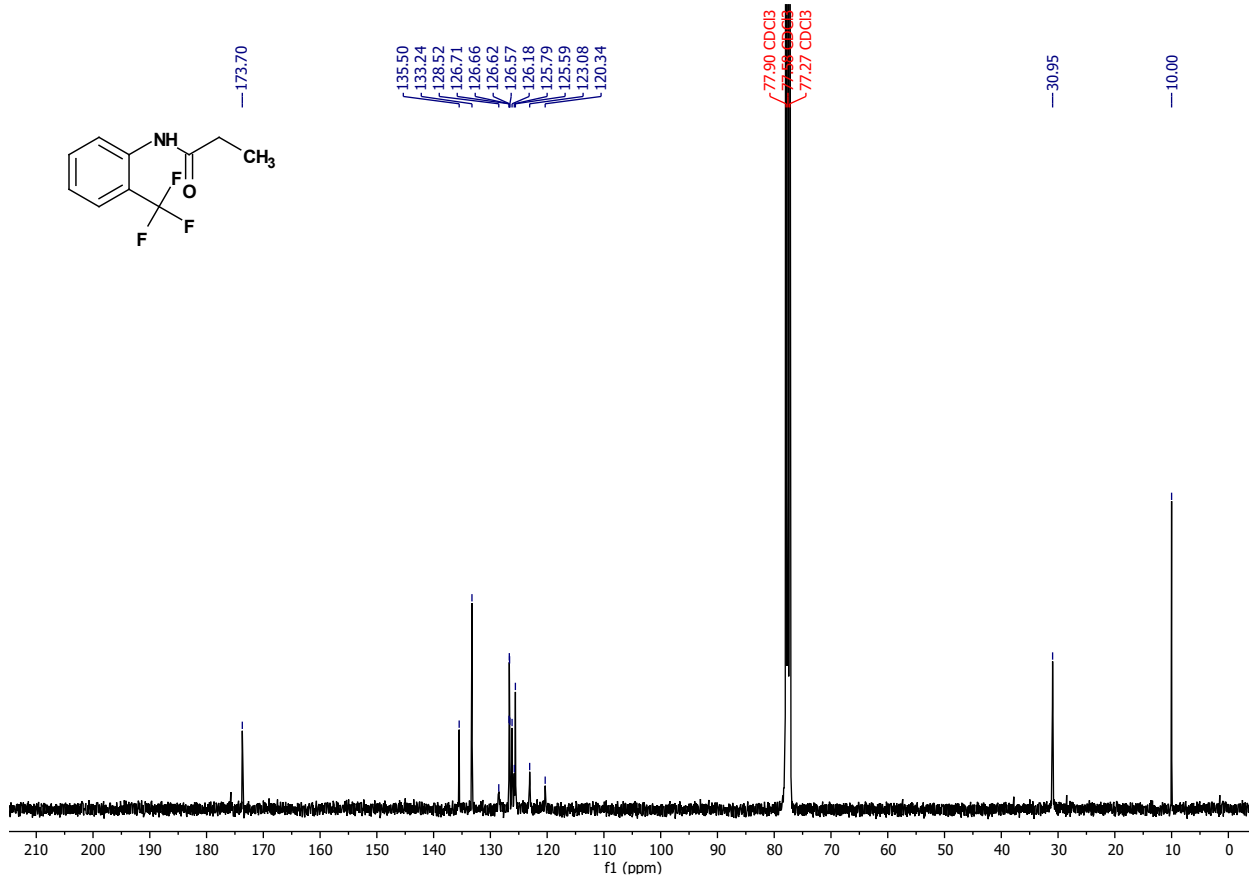

$^{19}\text{F}$  NMR *N*-(2-(trifluoromethyl)phenyl)propionamide (**3d-a**)

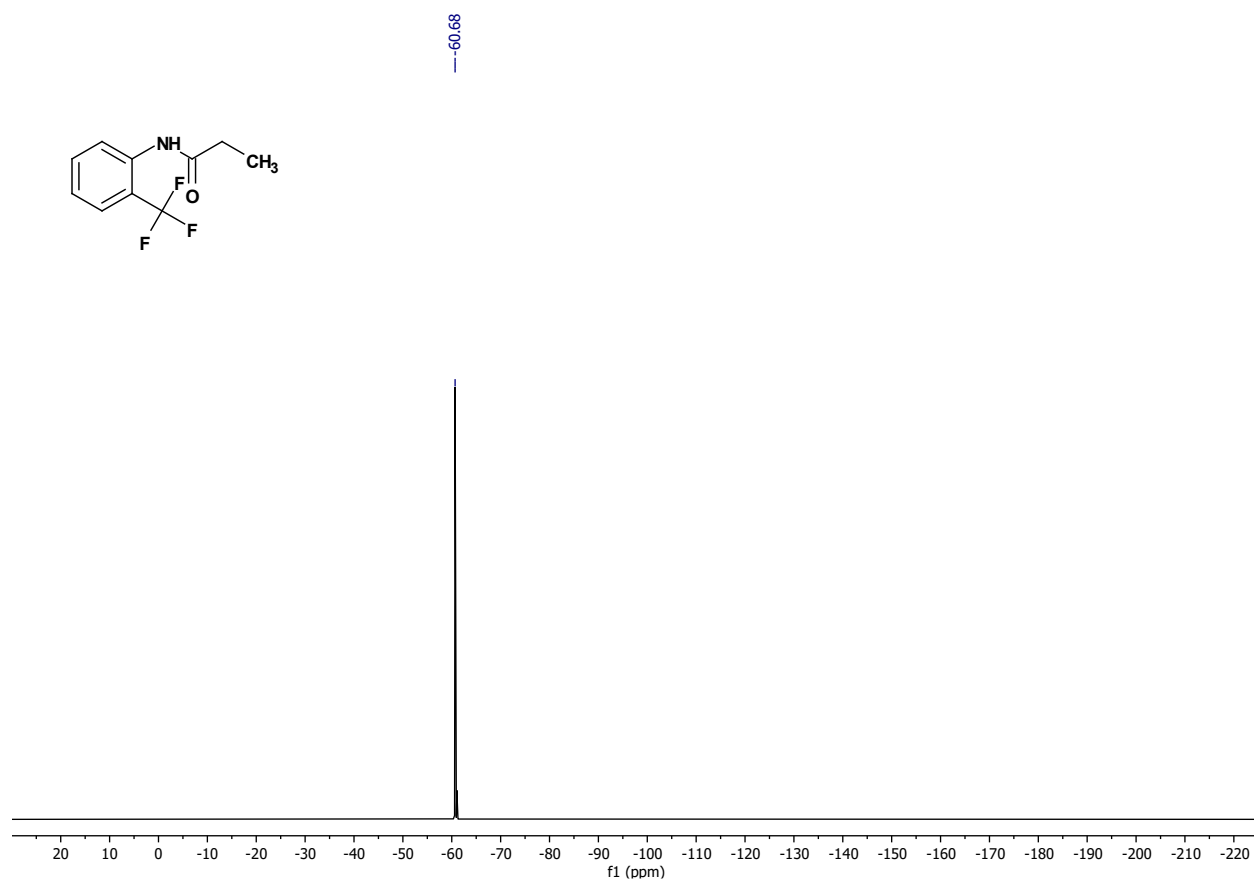

$^1\text{H}$  and  $^{13}\text{C}$  NMR *N*-(3-(trifluoromethyl)phenyl)propionamide (**3d-b**)

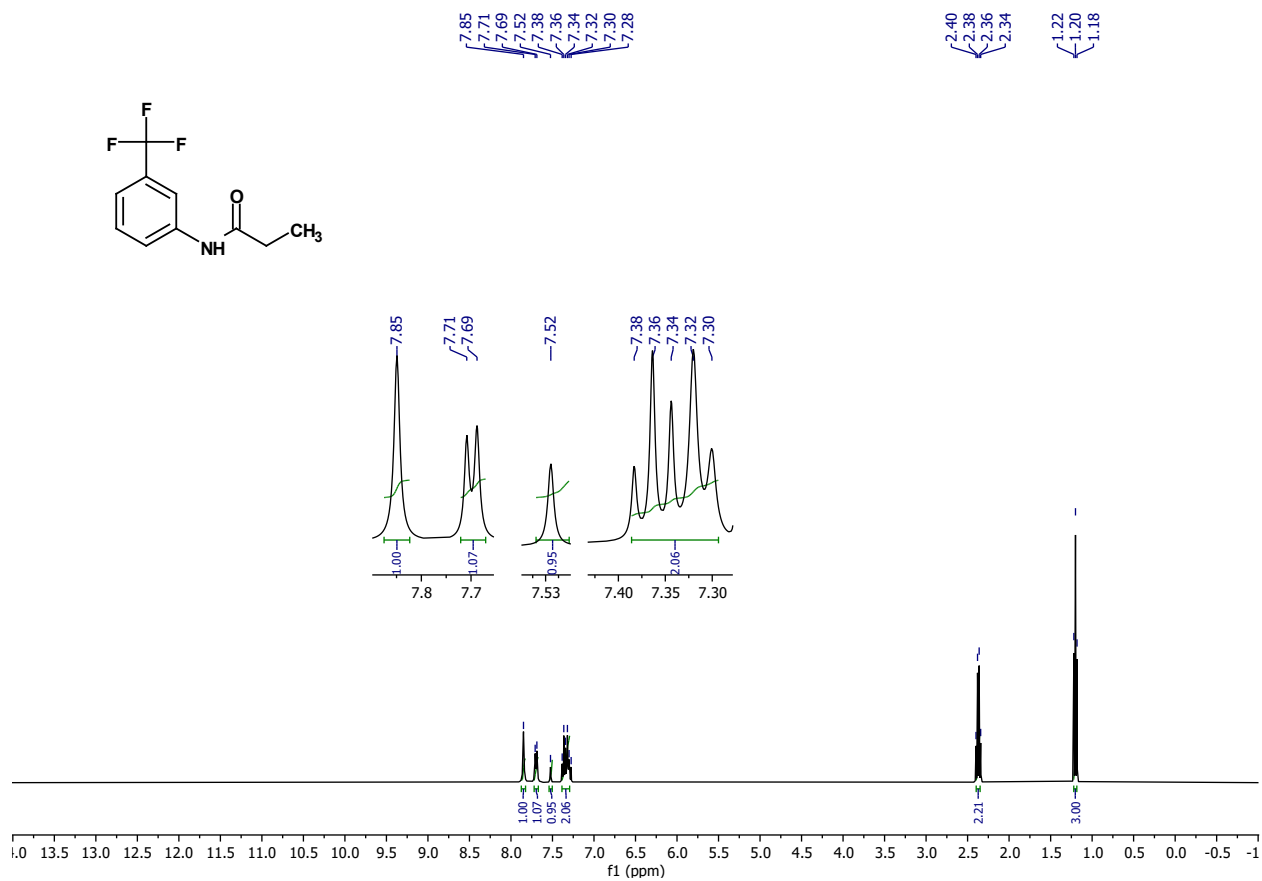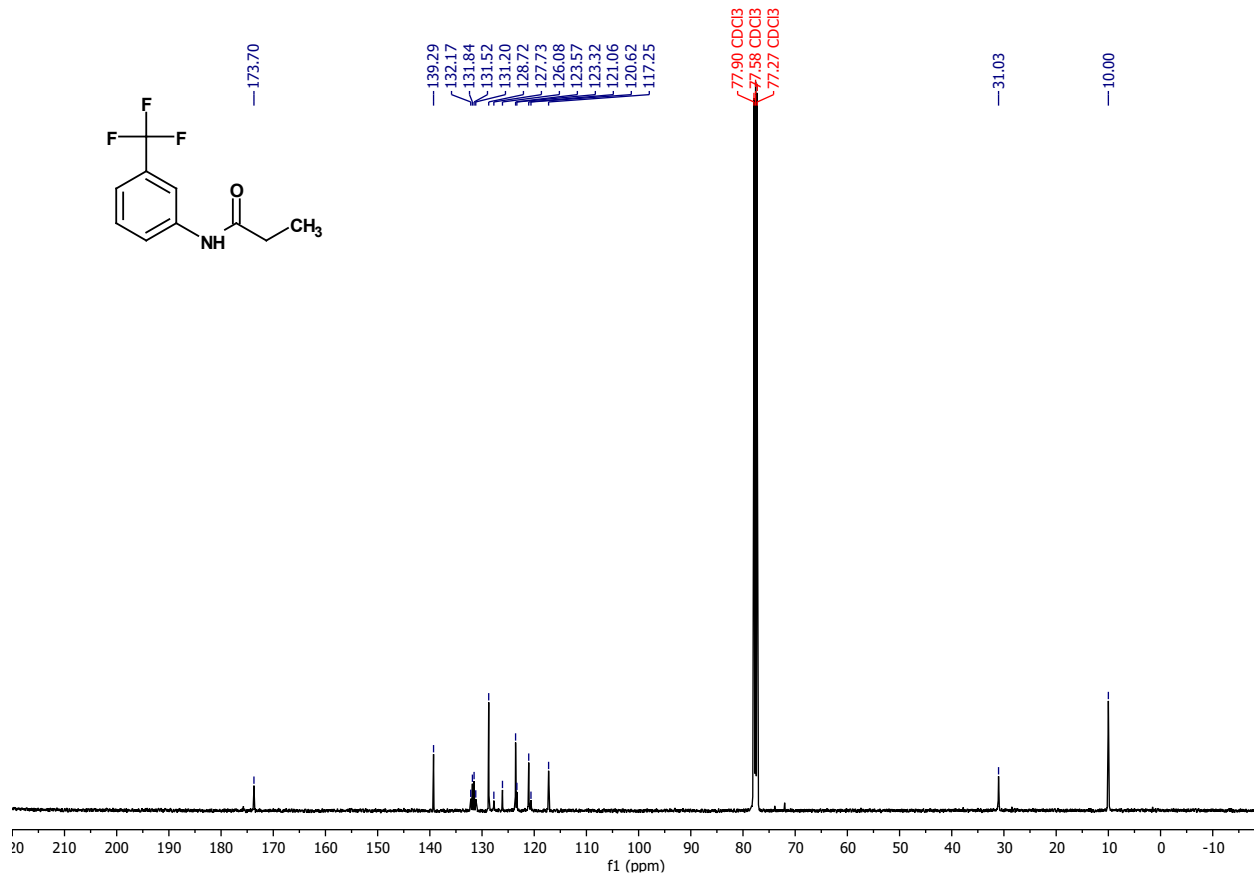

$^{19}\text{F}$  NMR *N*-(3-(trifluoromethyl)phenyl)propionamide (**3d-b**)

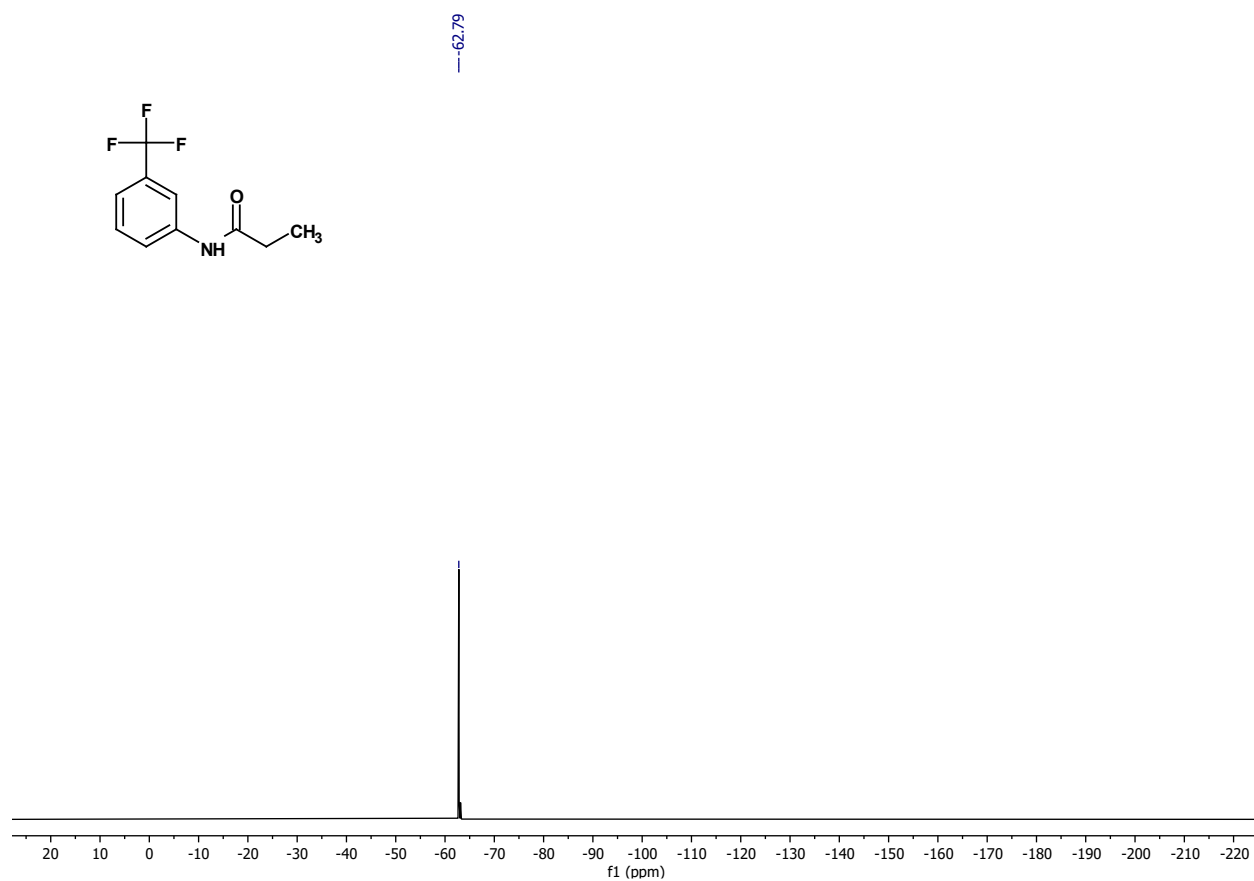

$^1\text{H}$  and  $^{13}\text{C}$  NMR *N*-(4-(trifluoromethyl)phenyl)propionamide (**3d-c**)

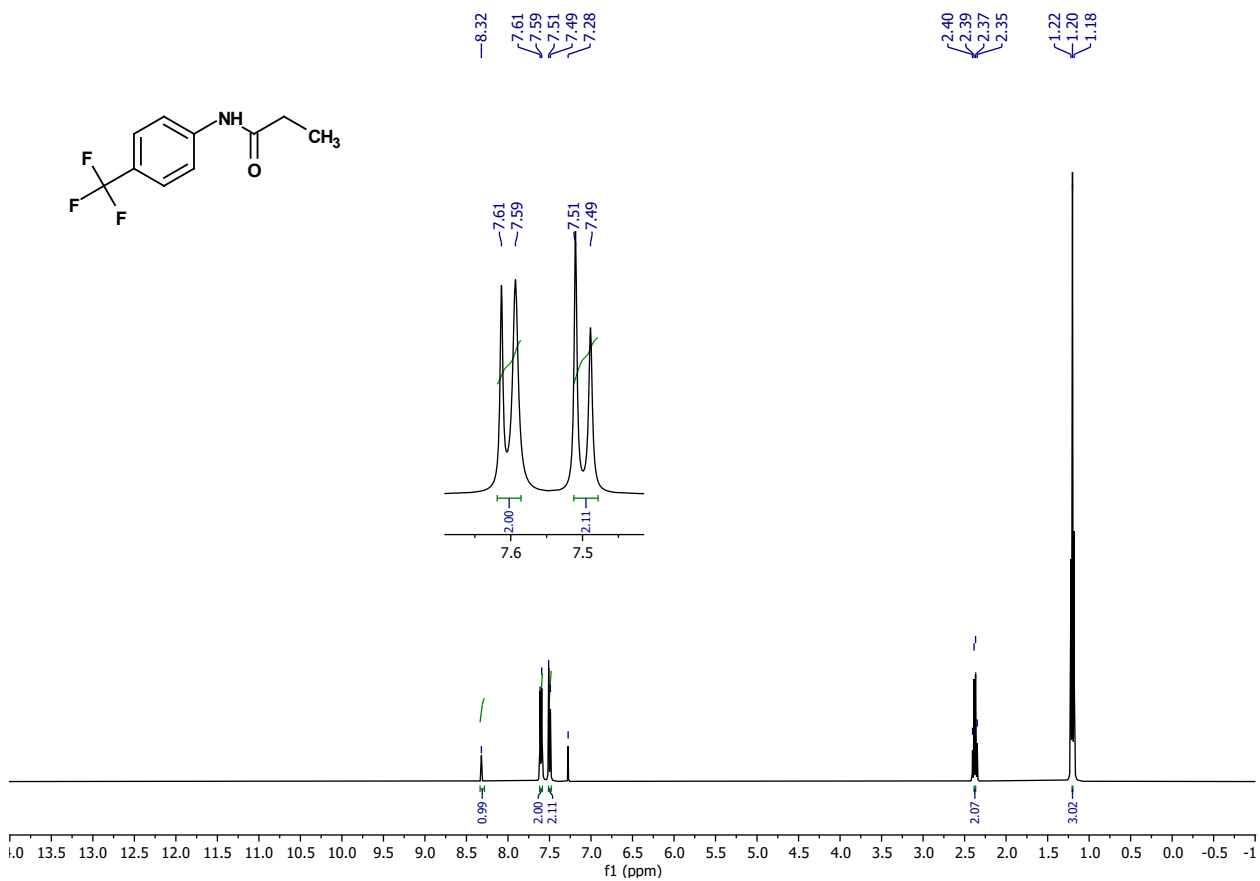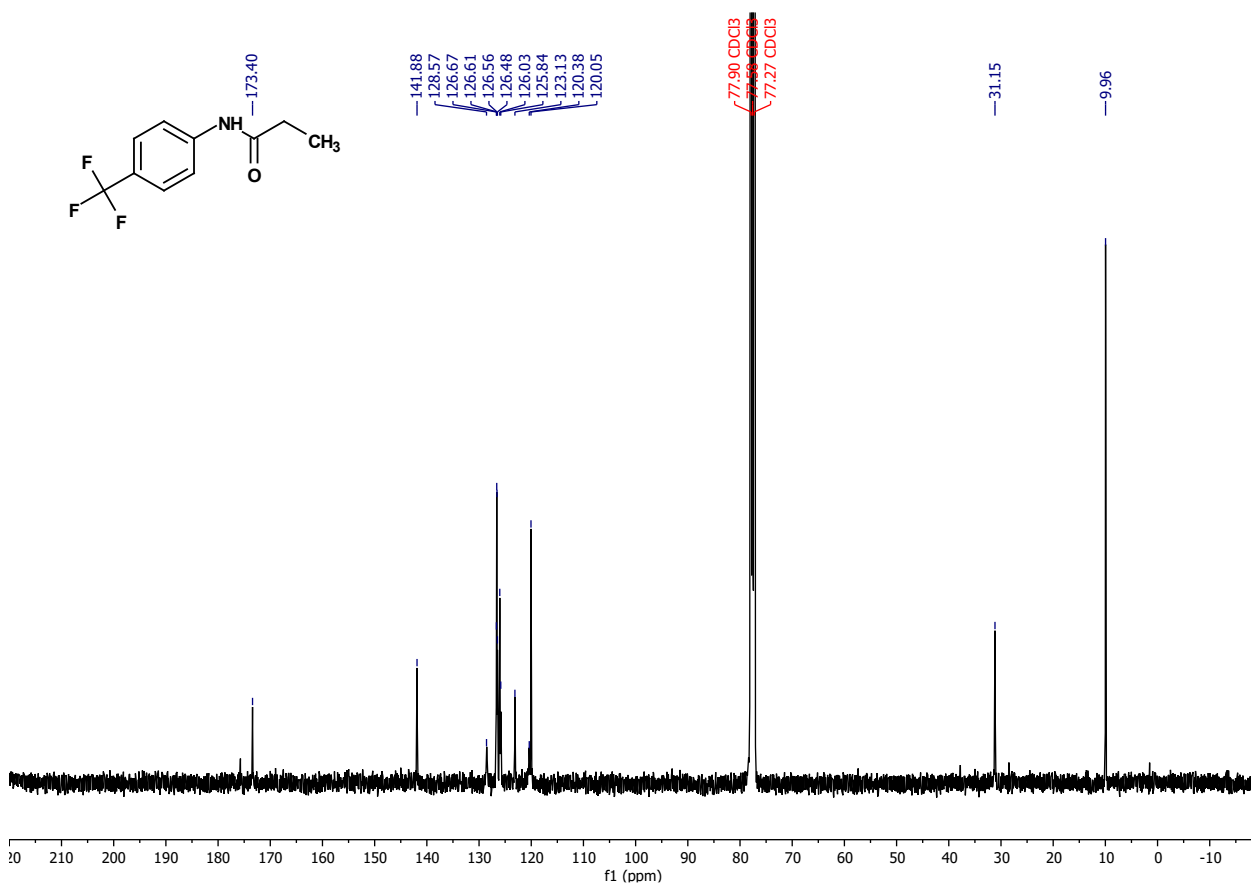

$^{19}\text{F}$  NMR *N*-(4-(trifluoromethyl)phenyl)propionamide (**3d-c**)

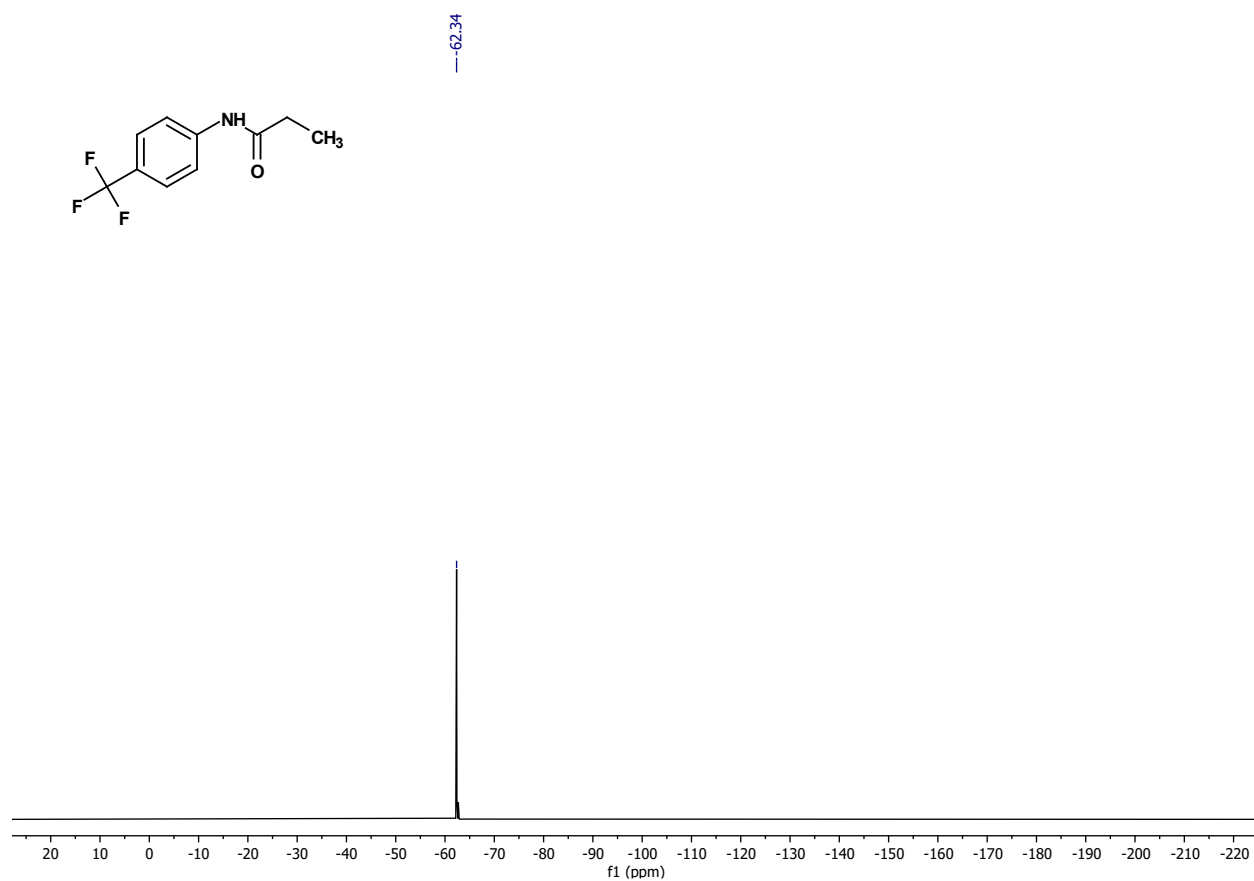

$^1\text{H}$  and  $^{13}\text{C}$  NMR *N*-(2-chloro-5-(trifluoromethyl)phenyl)propionamide (**3e**)

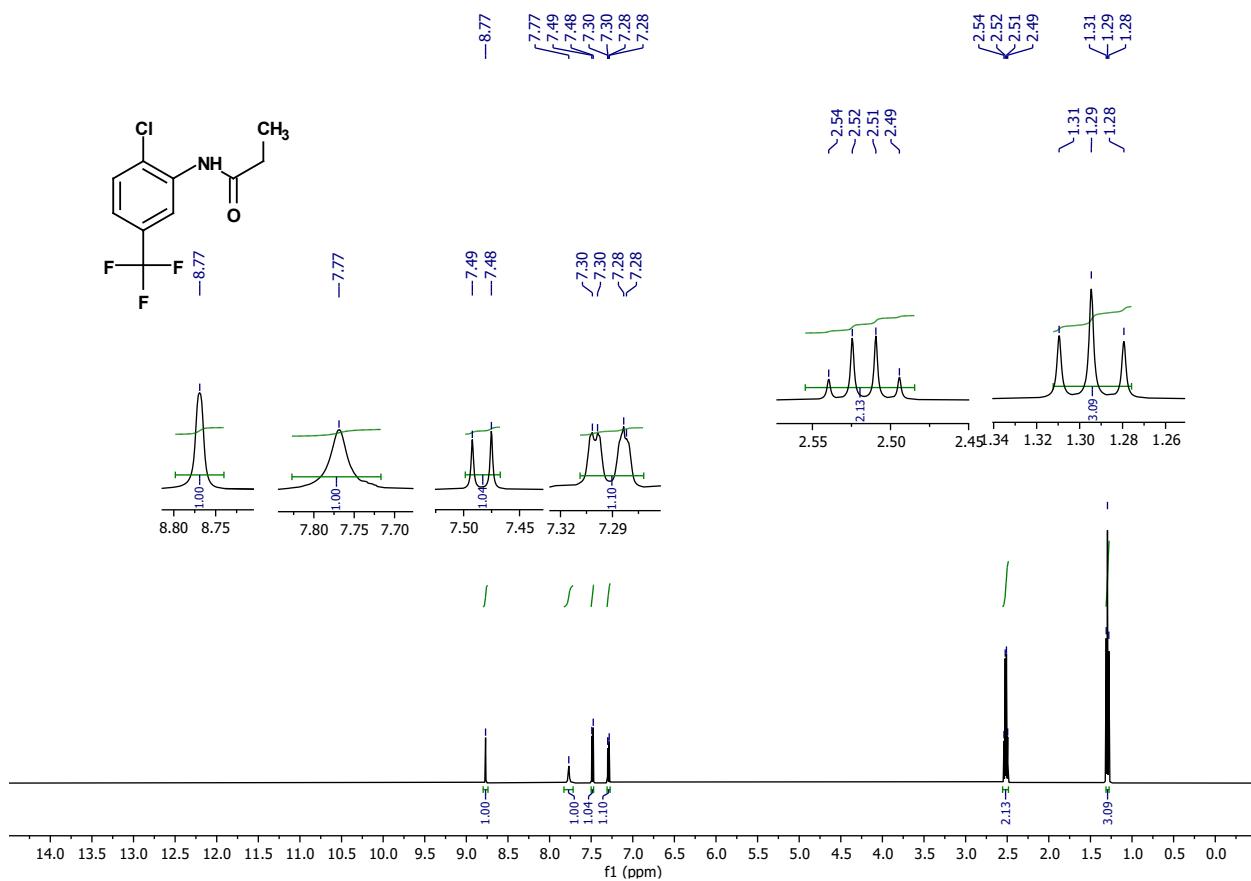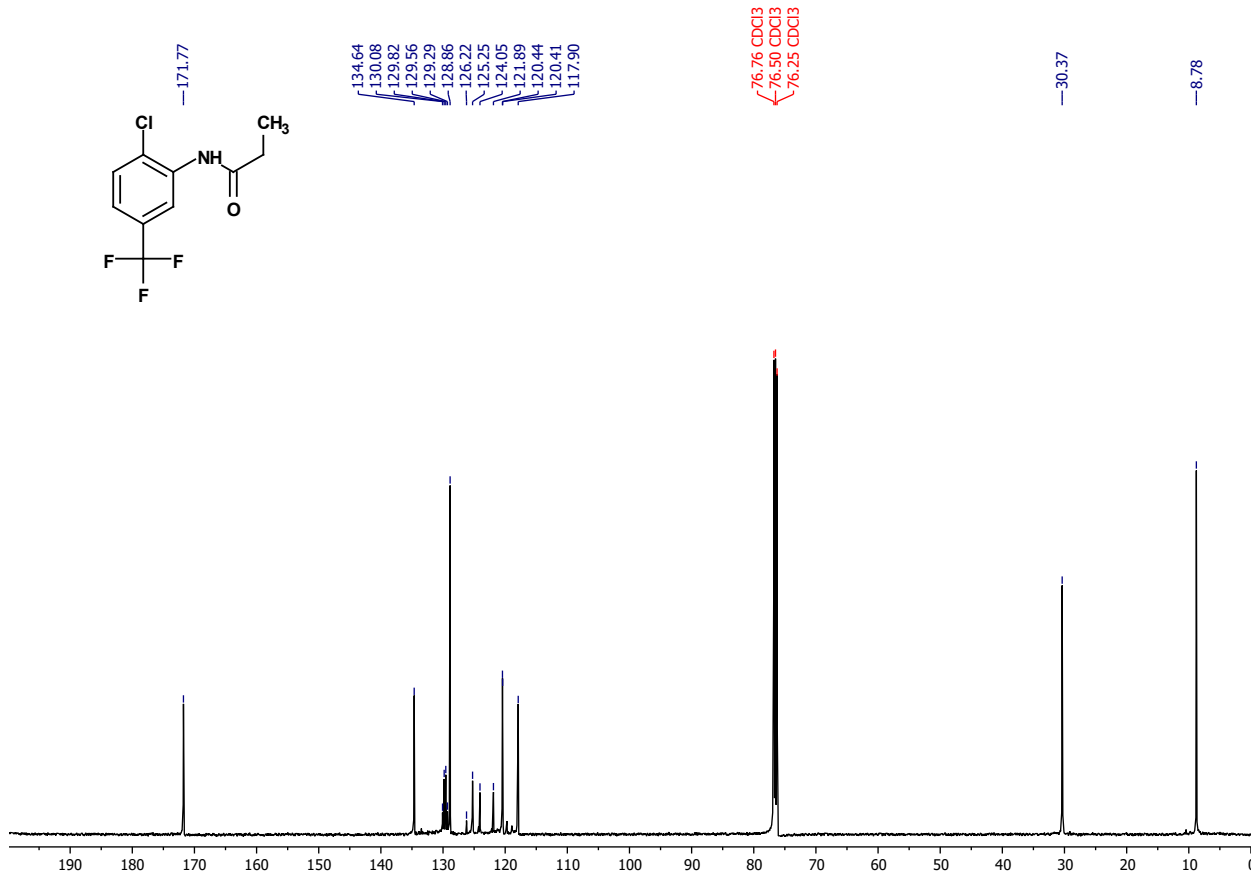

$^{19}\text{F}$  NMR *N*-(2-chloro-5-(trifluoromethyl)phenyl)propionamide (**3e**)

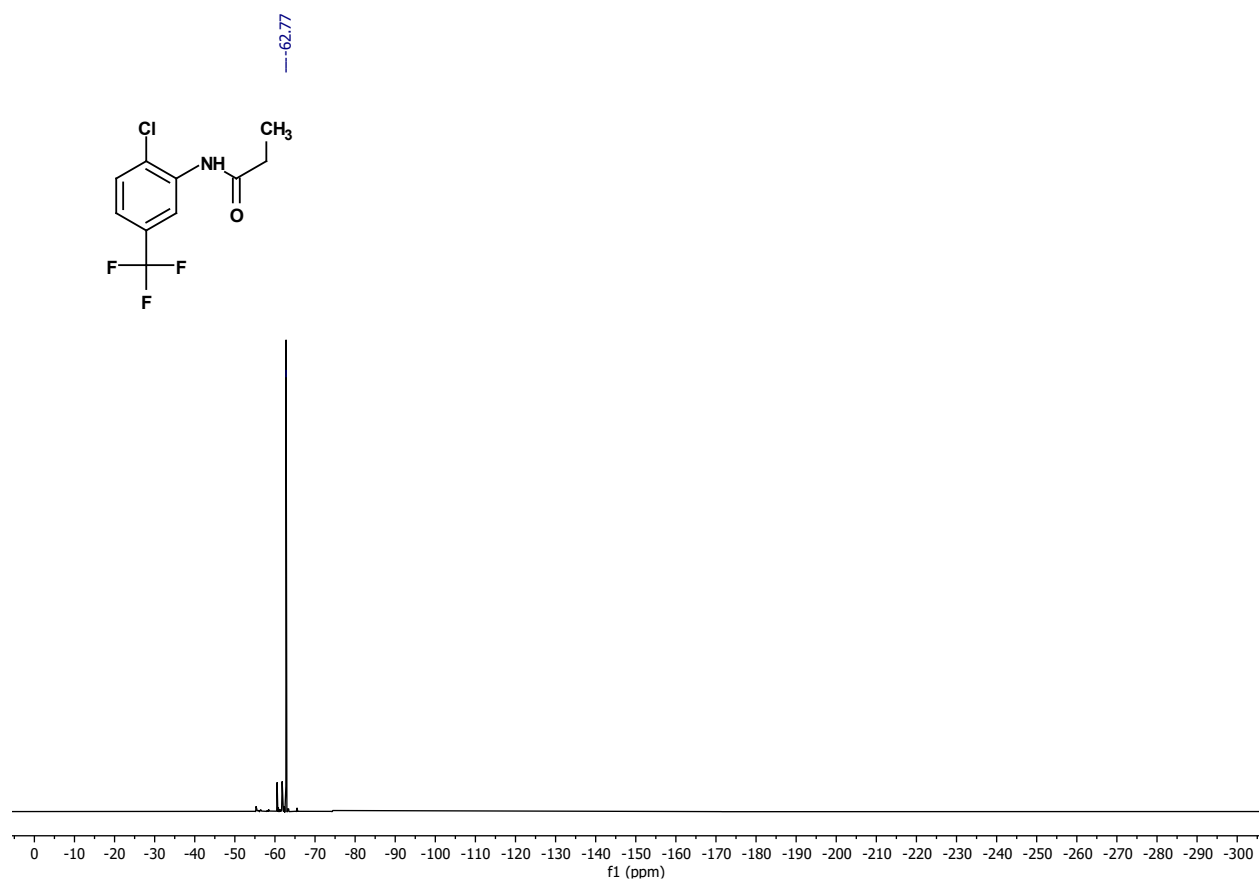



**COSY** NMR *N*-(2-chloro-5-(trifluoromethyl)phenyl)propionamide (**3e**)

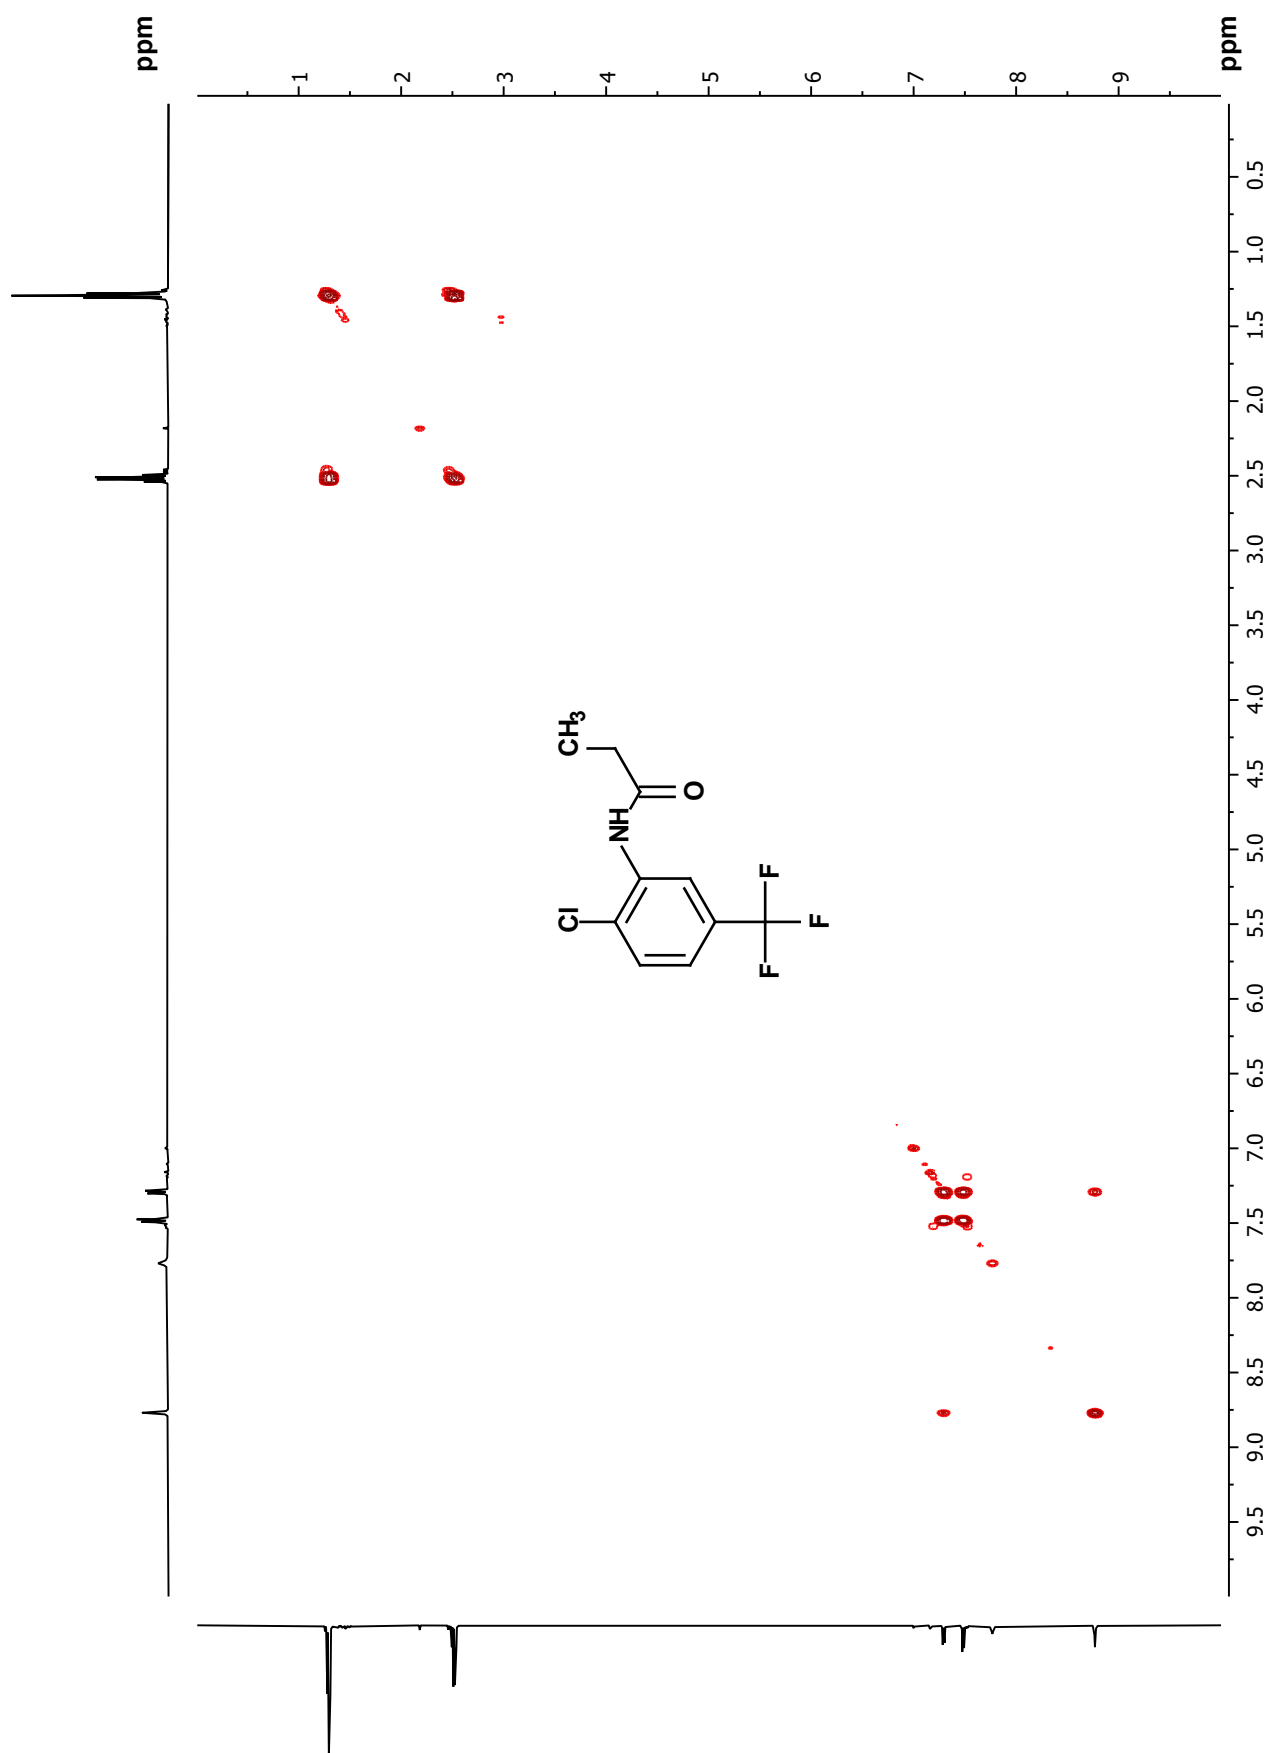

HSQC NMR *N*-(2-chloro-5-(trifluoromethyl)phenyl)propionamide (**3e**)

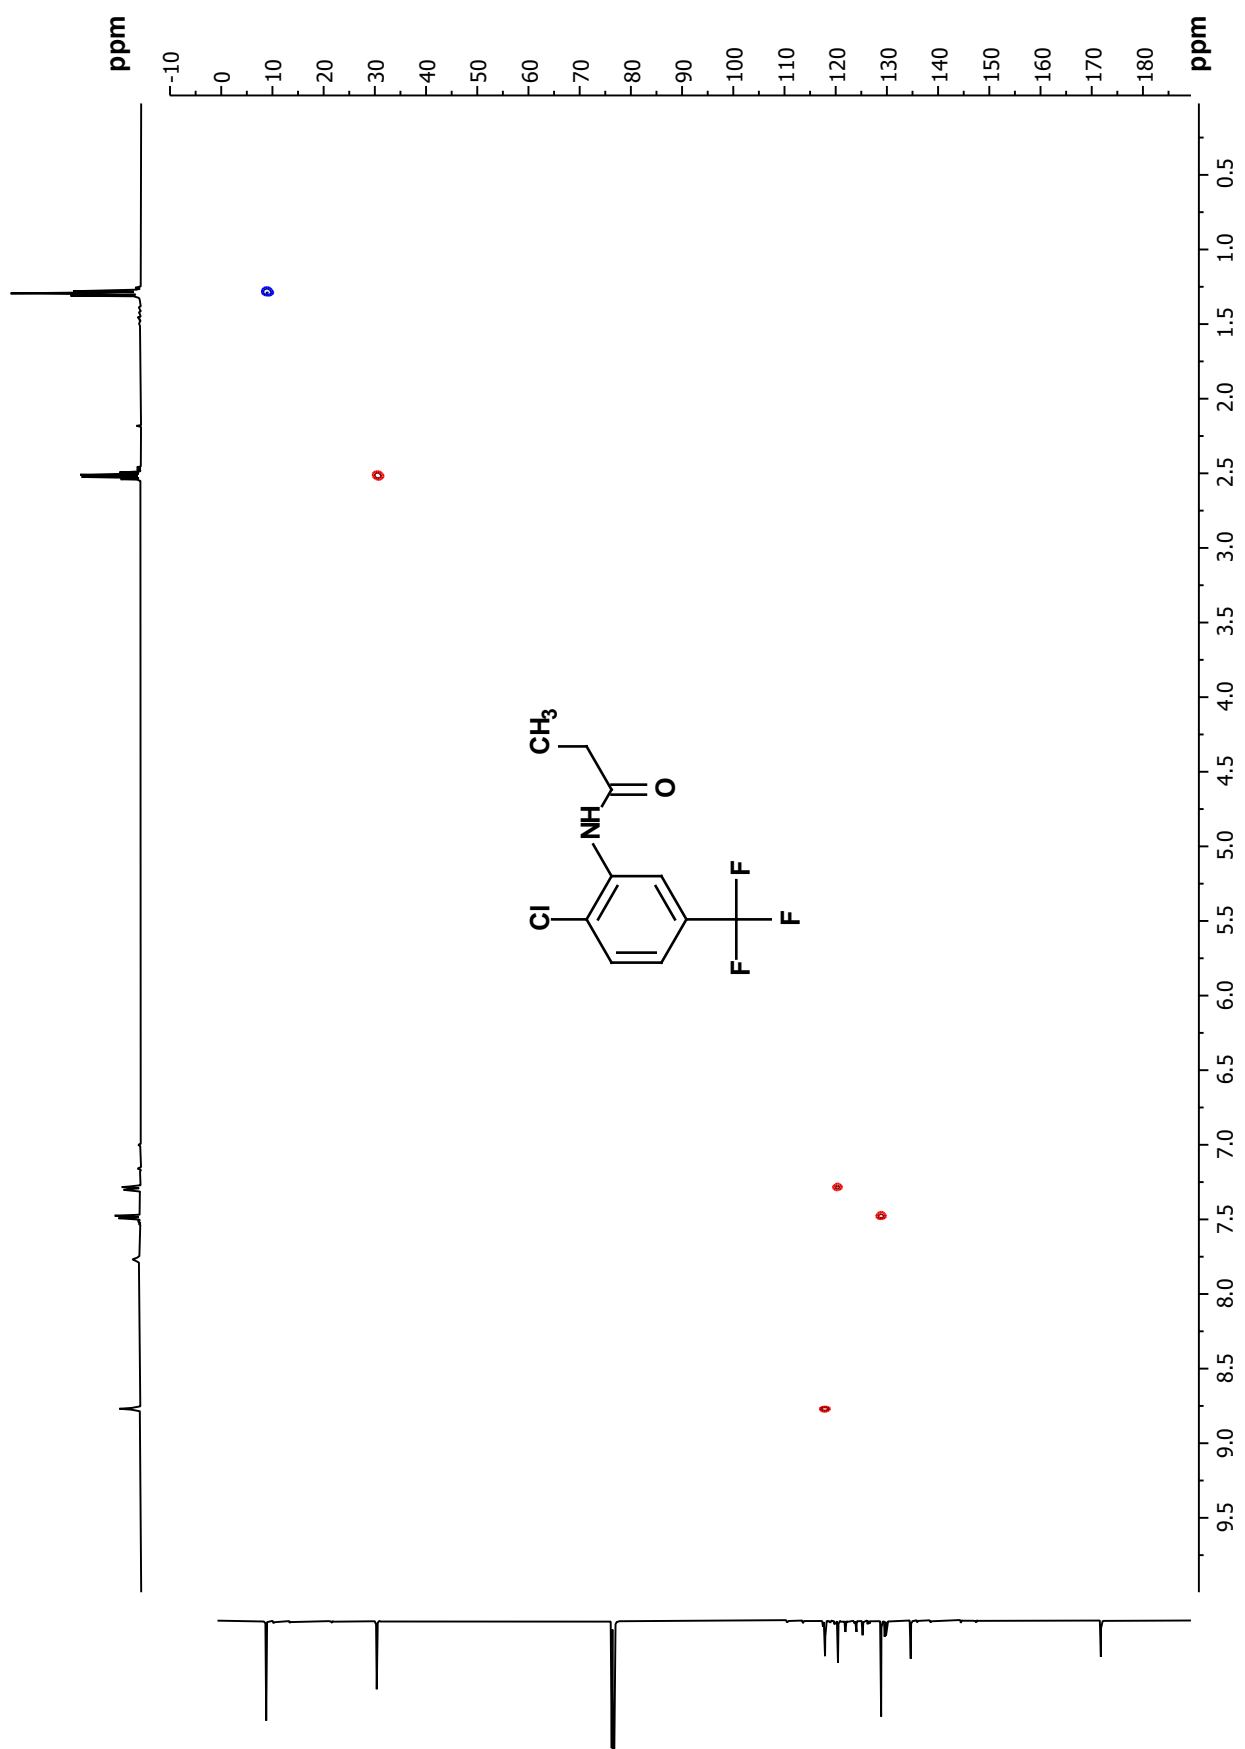

**HMBC** NMR *N*-(2-chloro-5-(trifluoromethyl)phenyl)propionamide (**3e**)

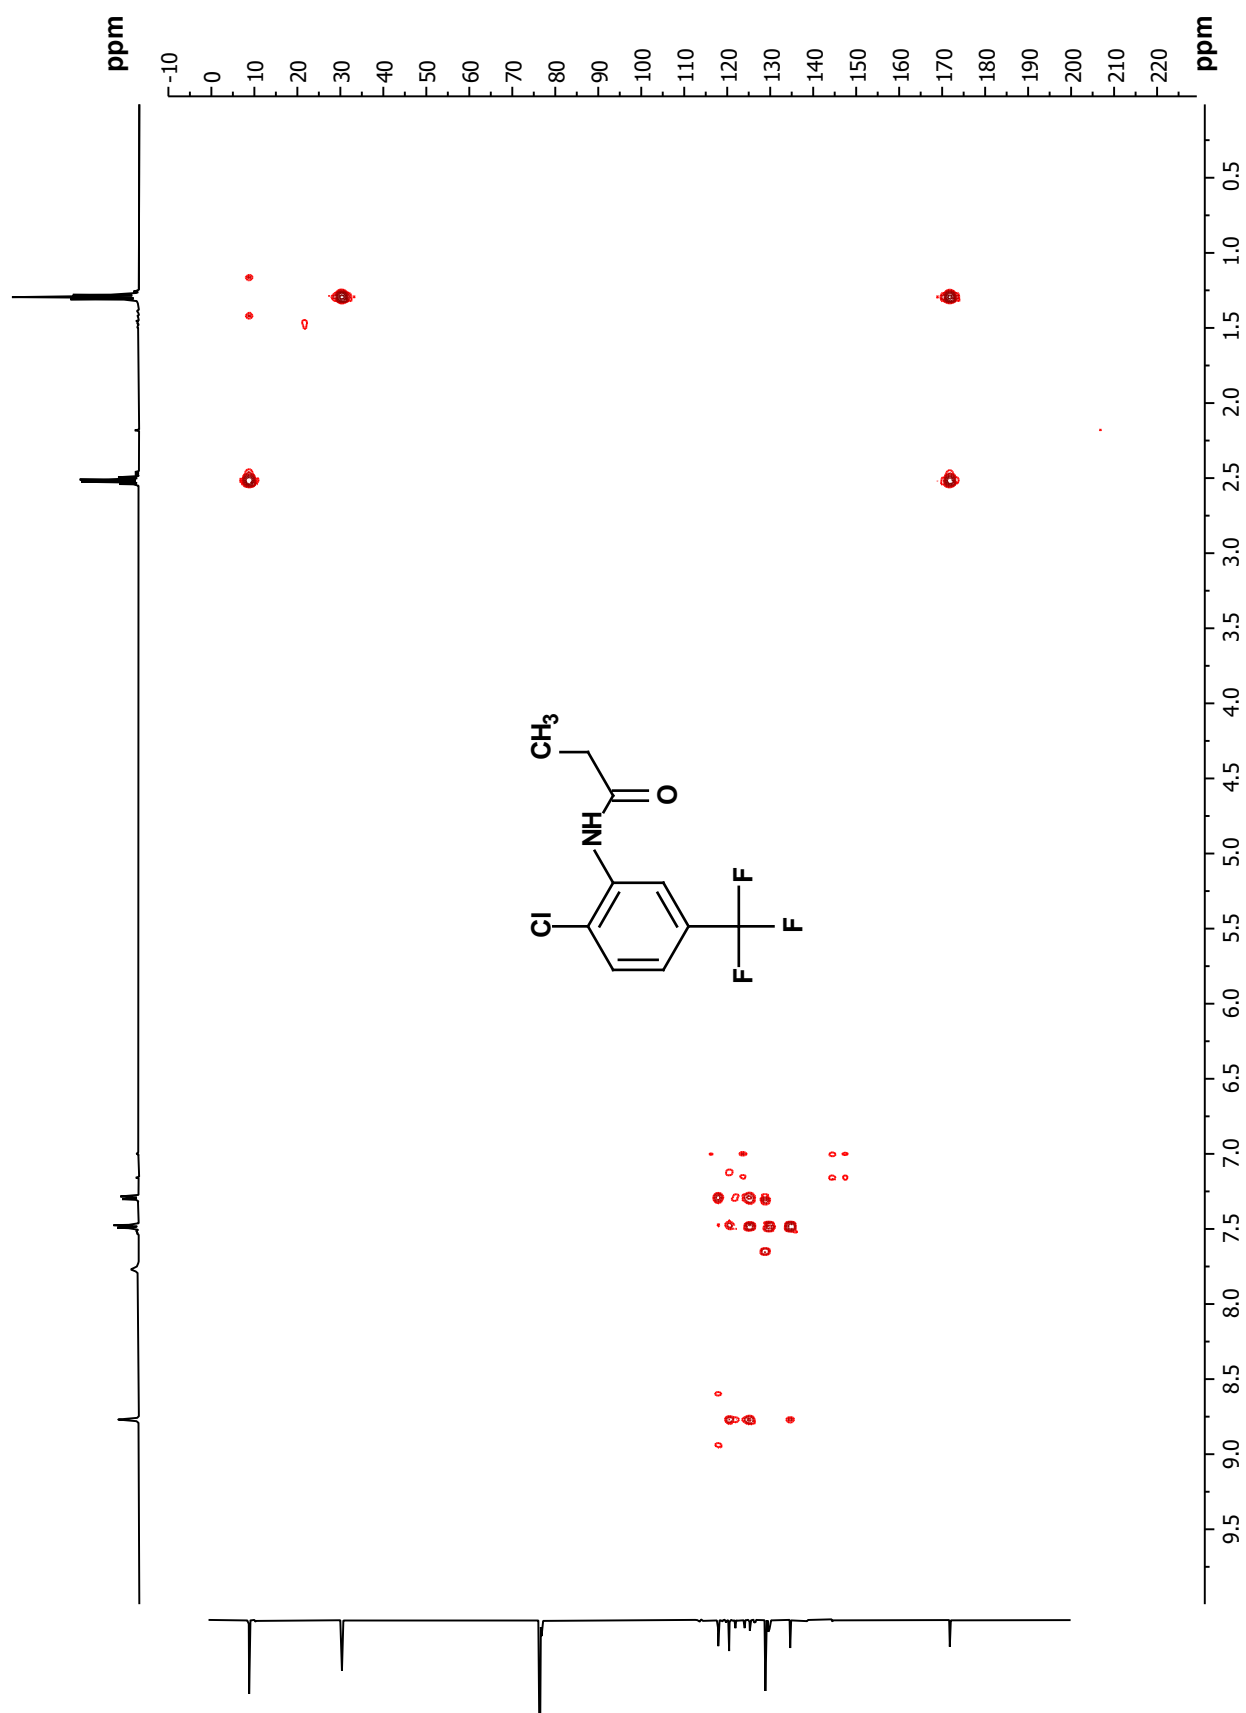

$^1\text{H}$  and  $^{13}\text{C}$  NMR *N*-(4-fluorophenyl)propionamide (**3f**)

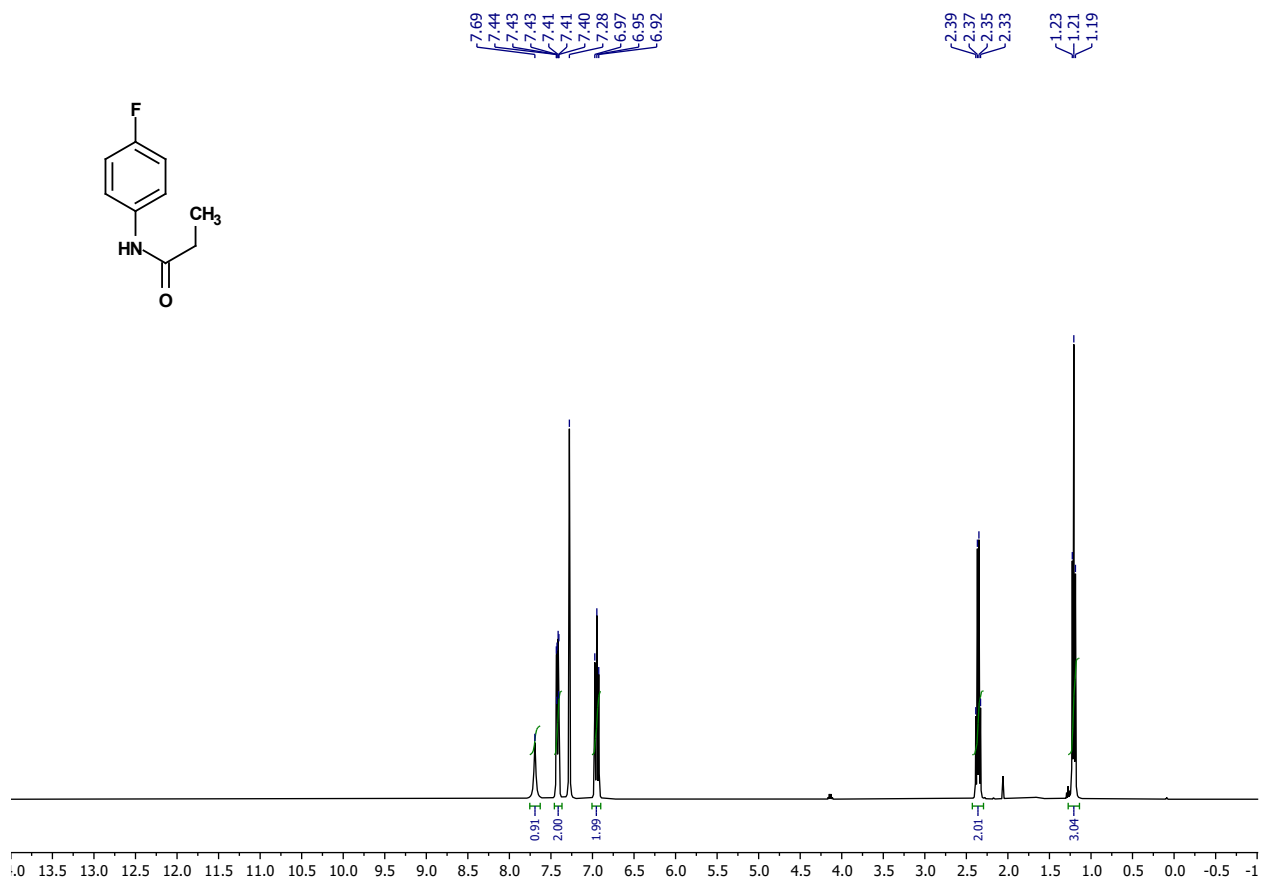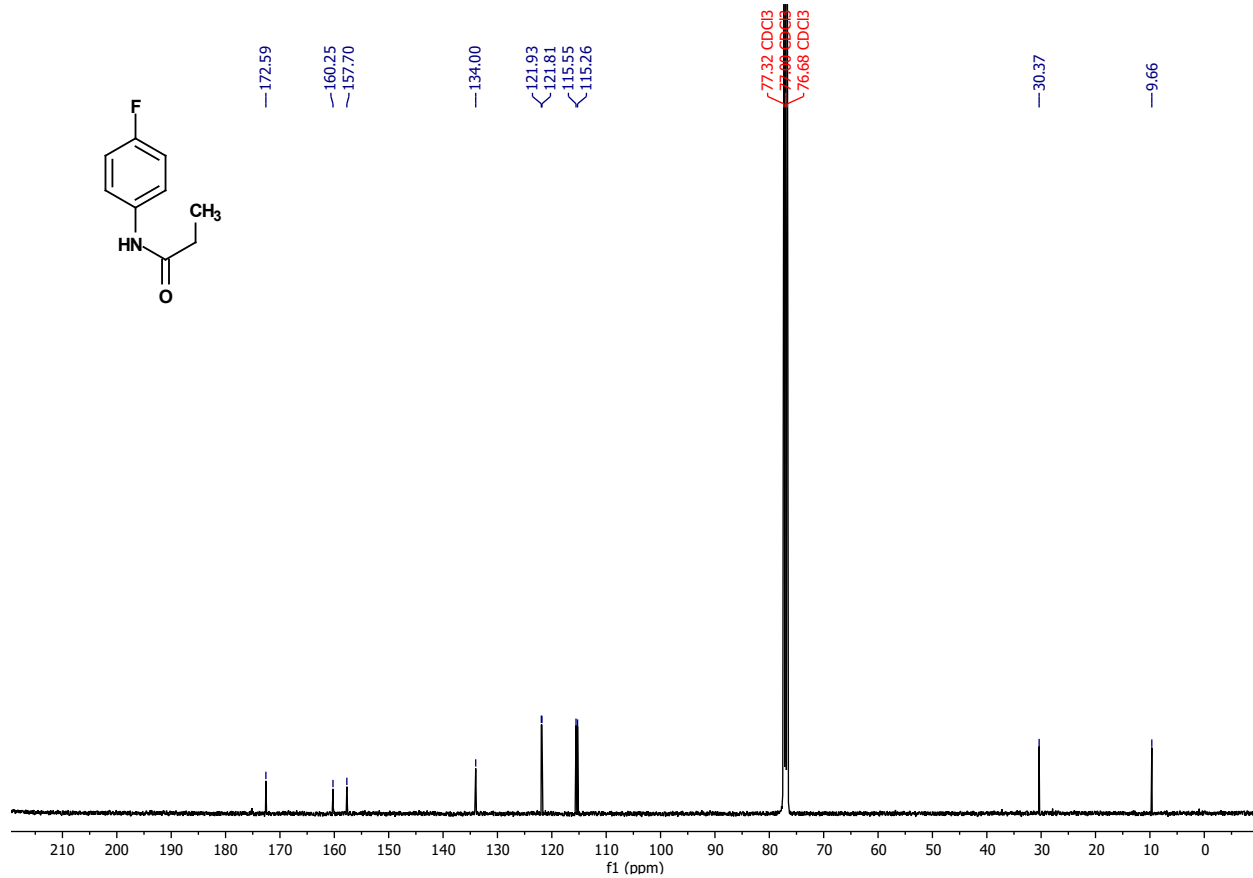

$^{19}\text{F}$  NMR *N*-(4-fluorophenyl)propionamide (**3f**)

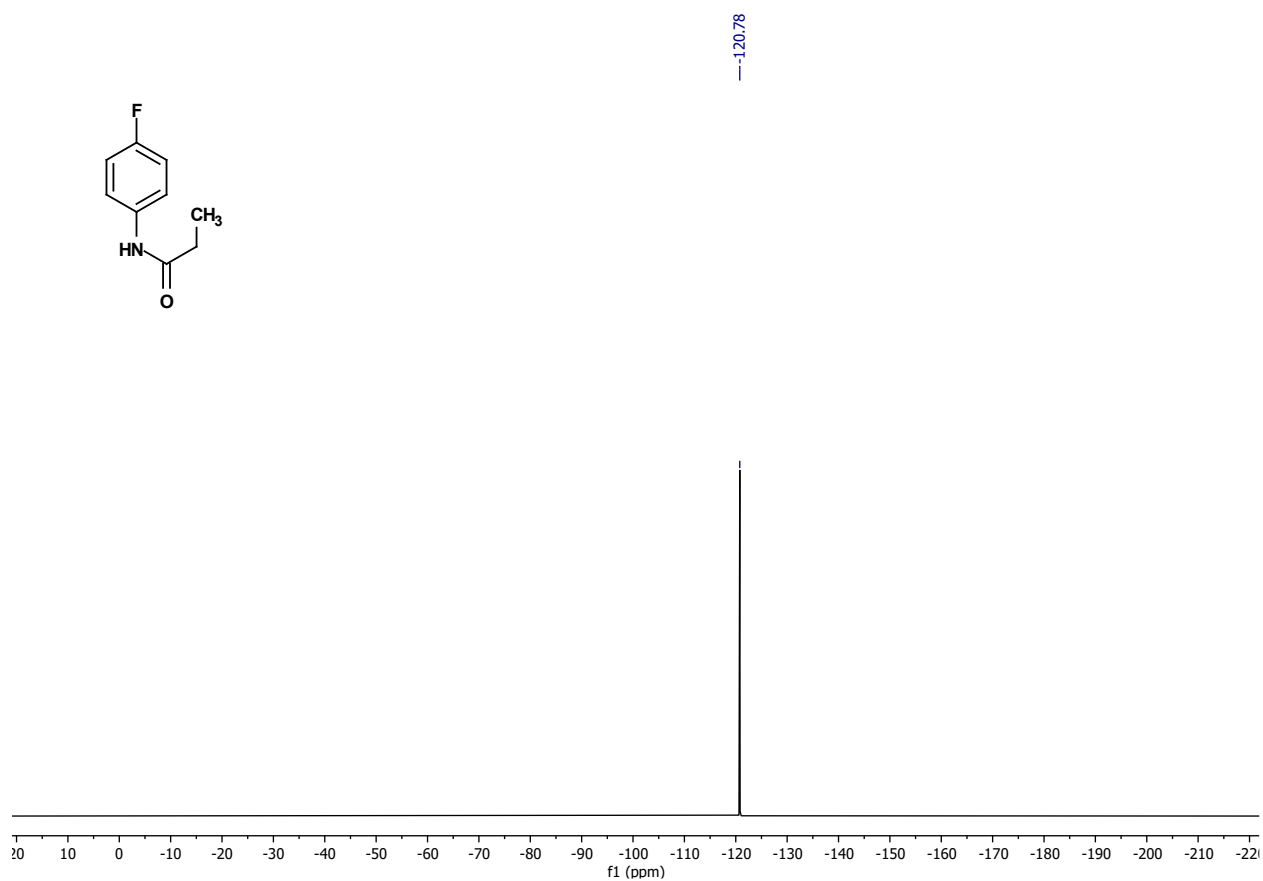

$^1\text{H}$  and  $^{13}\text{C}$  NMR *N*-(4-chlorophenyl)propionamide (**3g**)

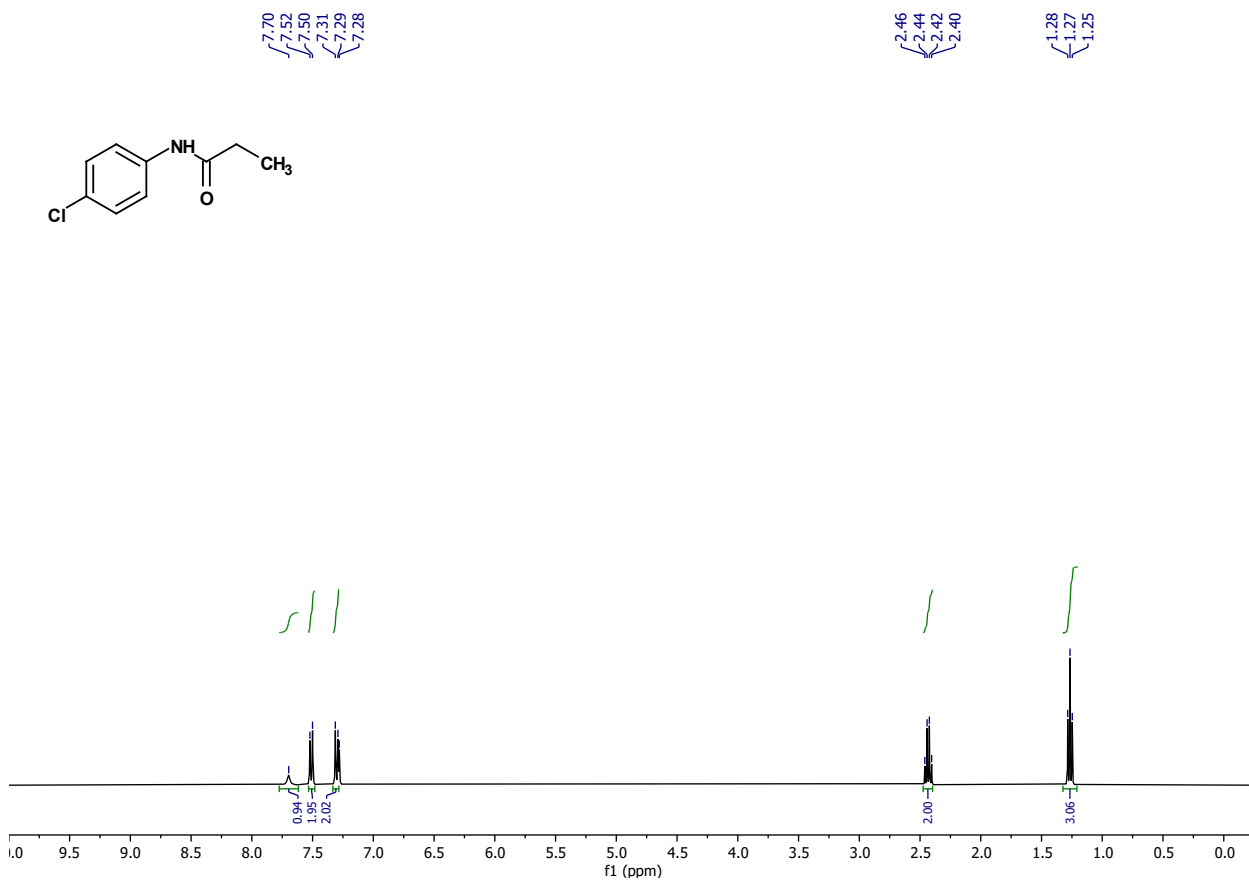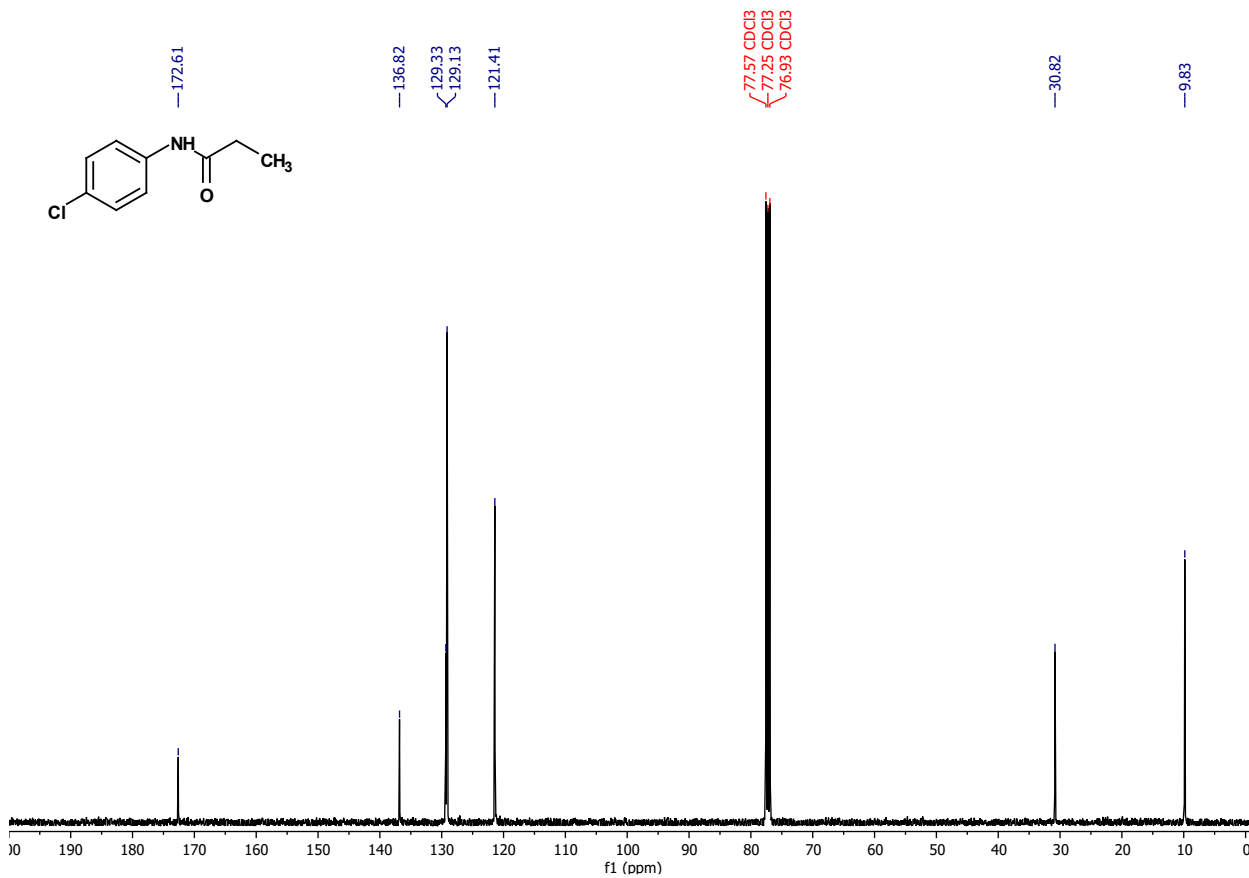

$^1\text{H}$  and  $^{13}\text{C}$  NMR *N*-(3,4-dichlorophenyl)propionamide (**3h-a**)

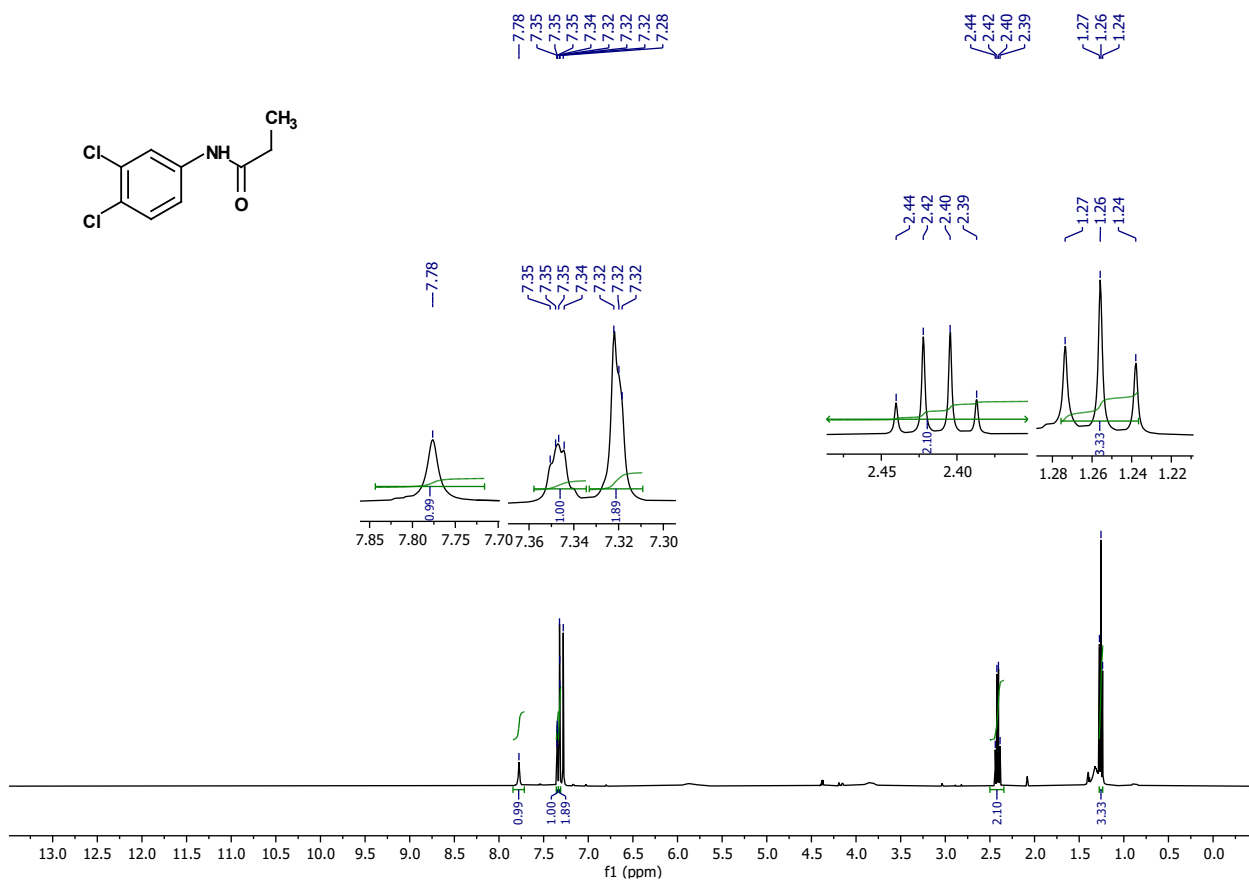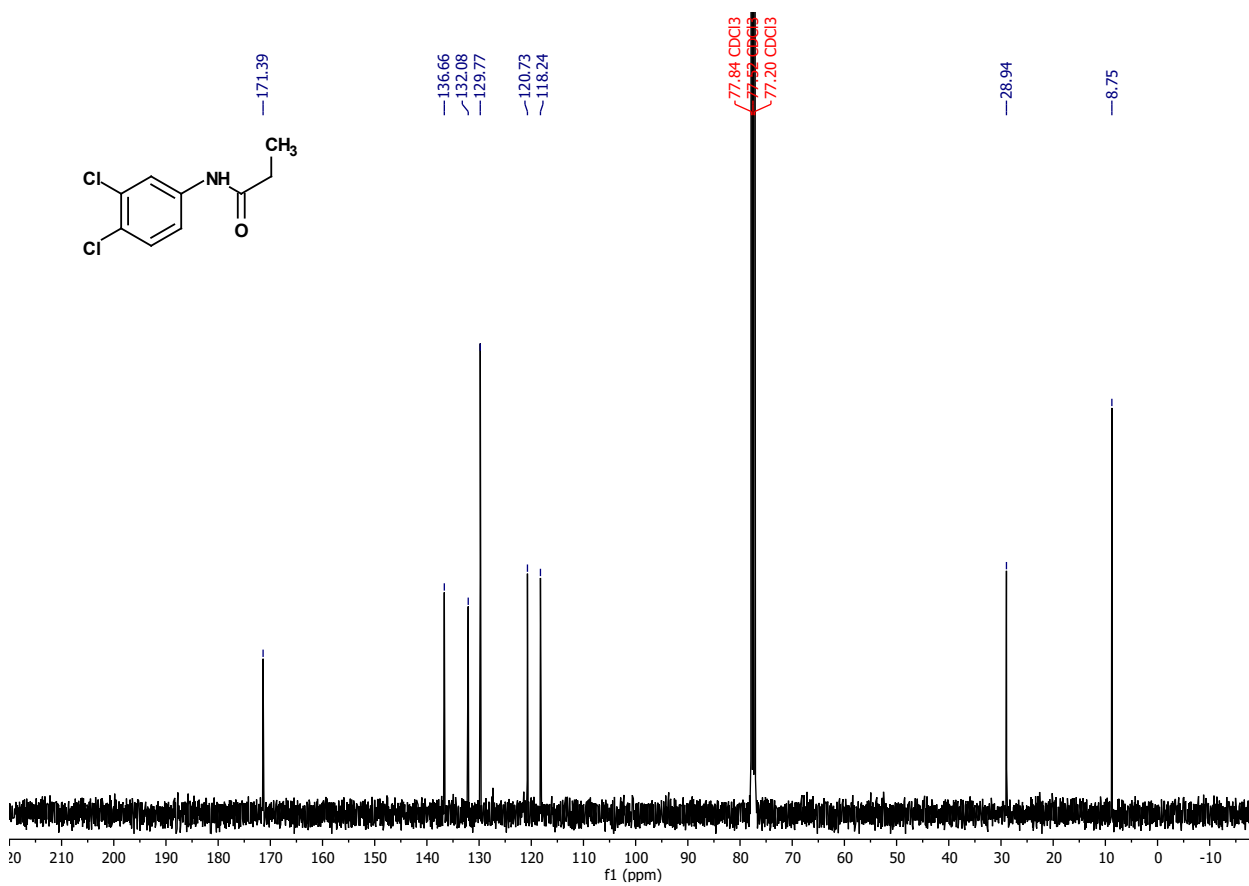

$^1\text{H}$  and  $^{13}\text{C}$  NMR *N*-(3,4-dichlorophenyl)propionamide (**3h-b**)

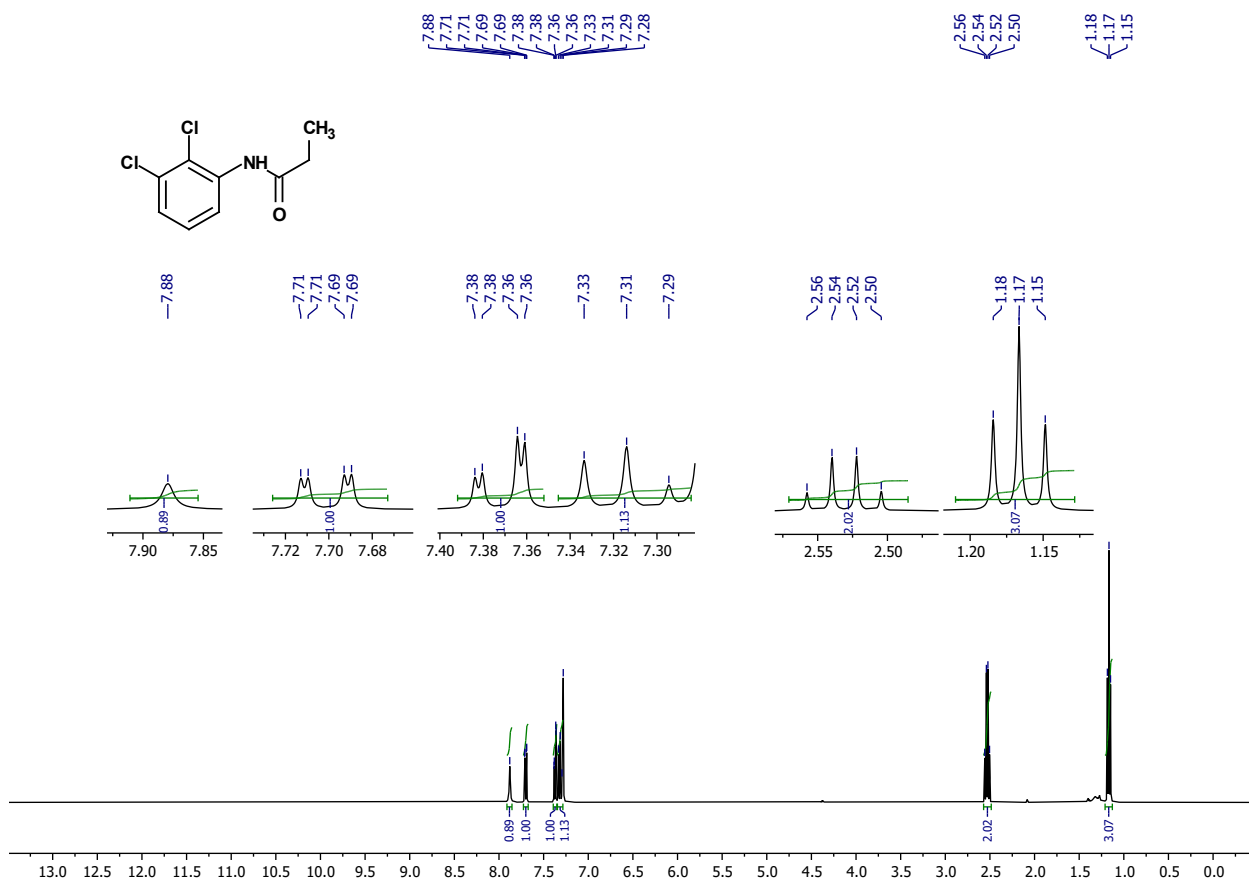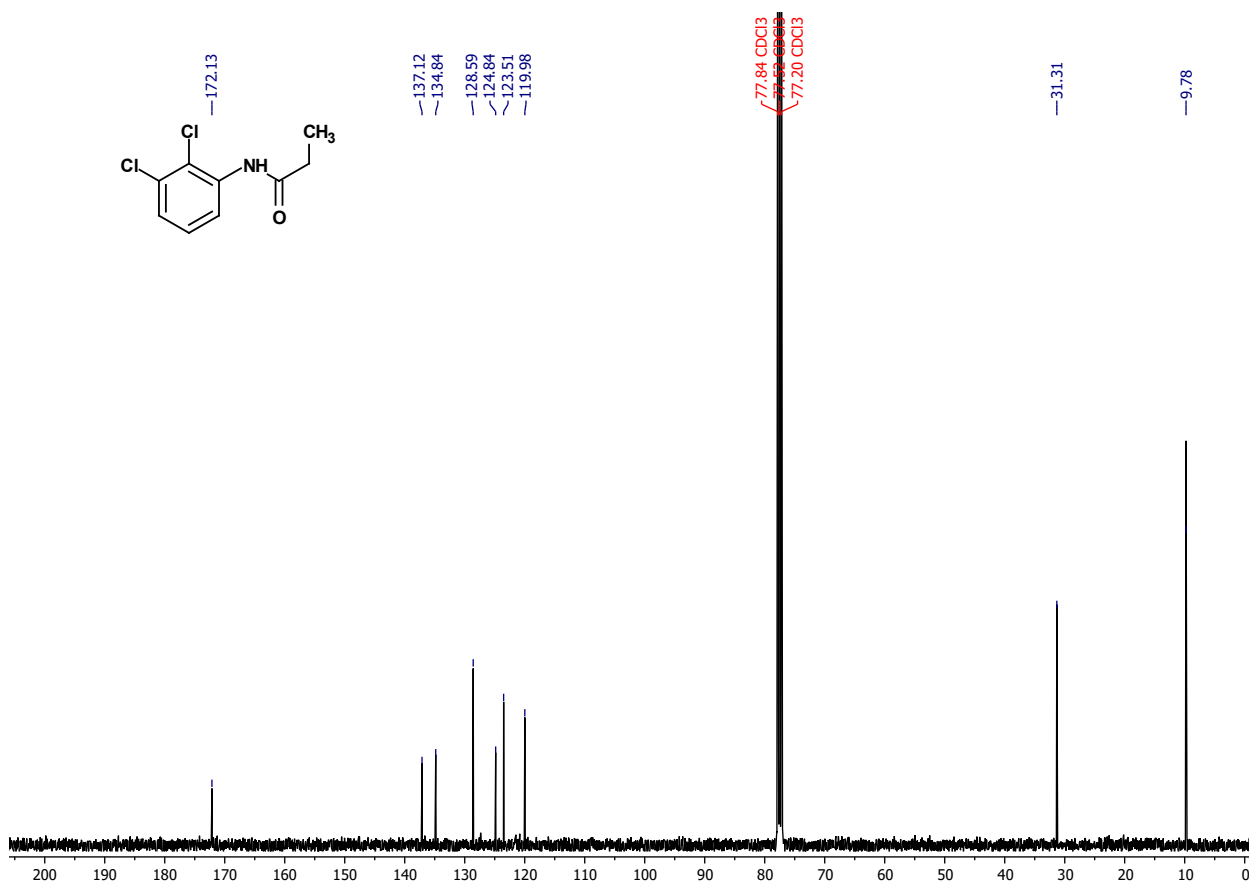



$^1\text{H}$  and  $^{13}\text{C}$  NMR *N*-(5-chloro-2-hydroxyphenyl)propionamide (**3i**)

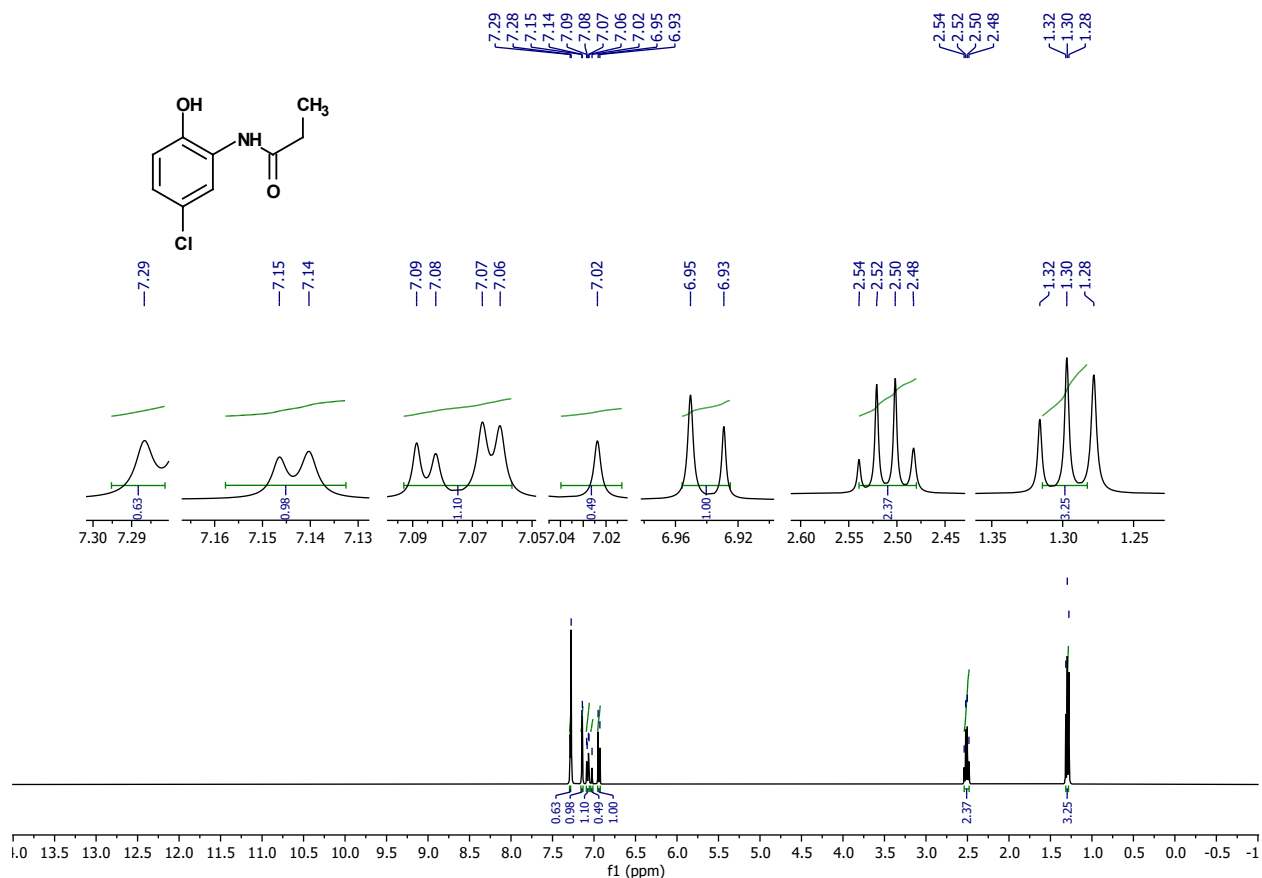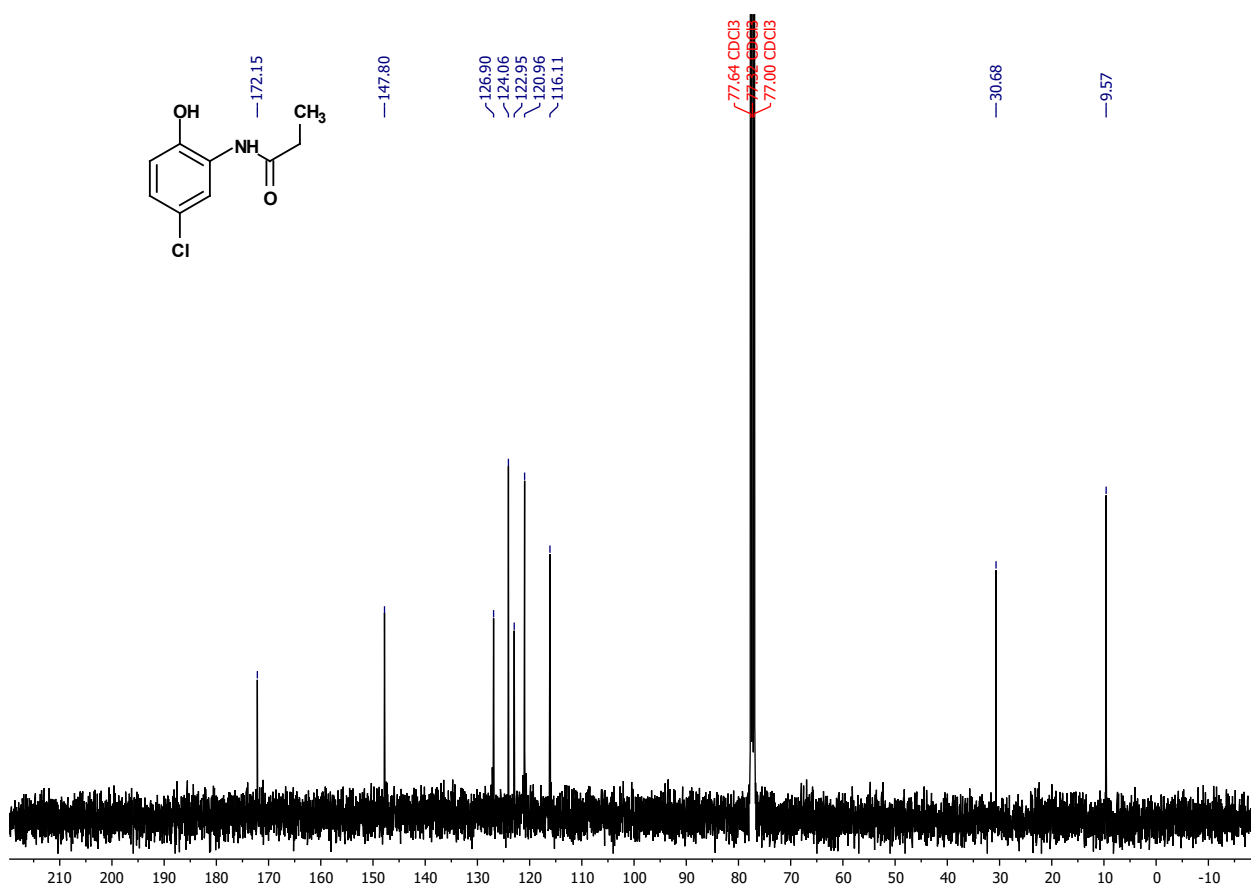

$^1\text{H}$  and  $^{13}\text{C}$  NMR 5-chloro-2-ethylbenzo[d]oxazole (**3ii**)

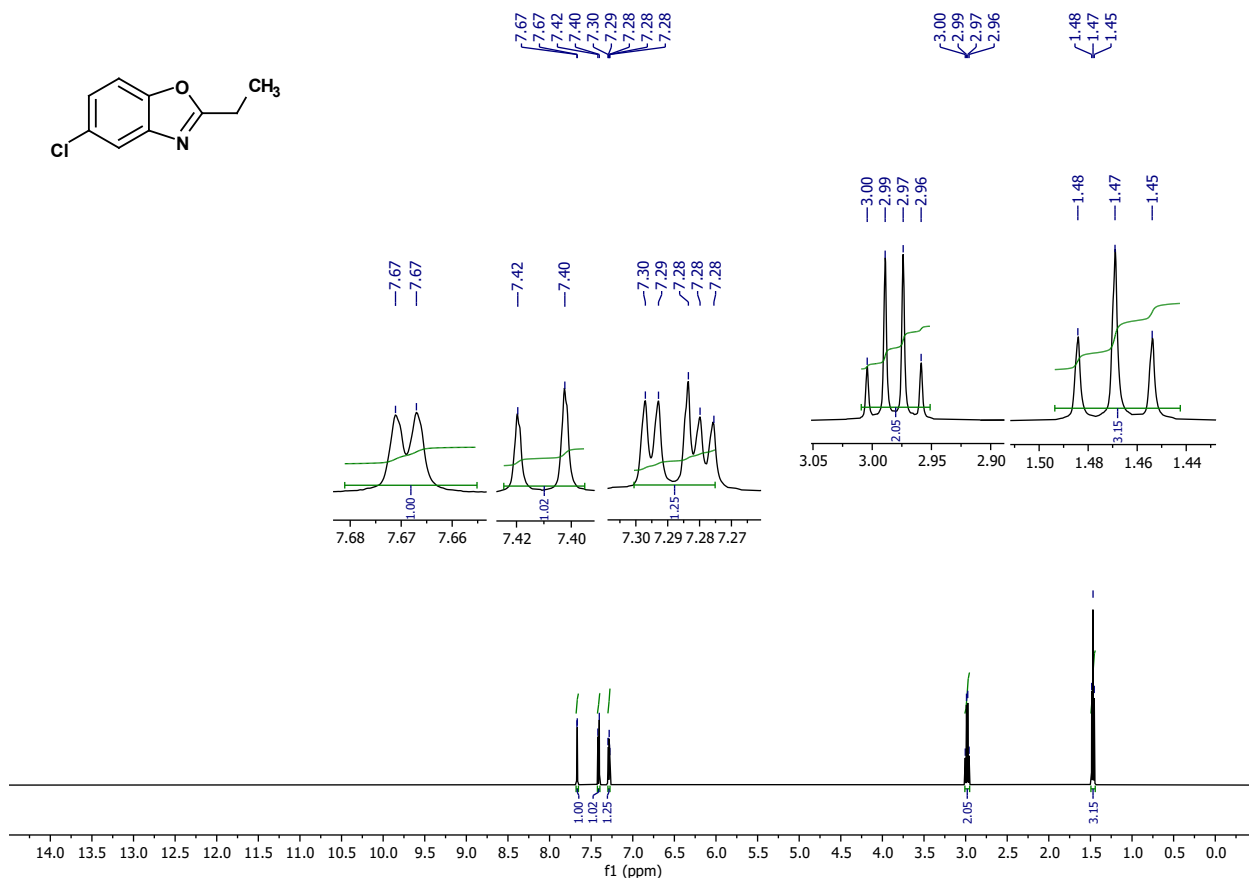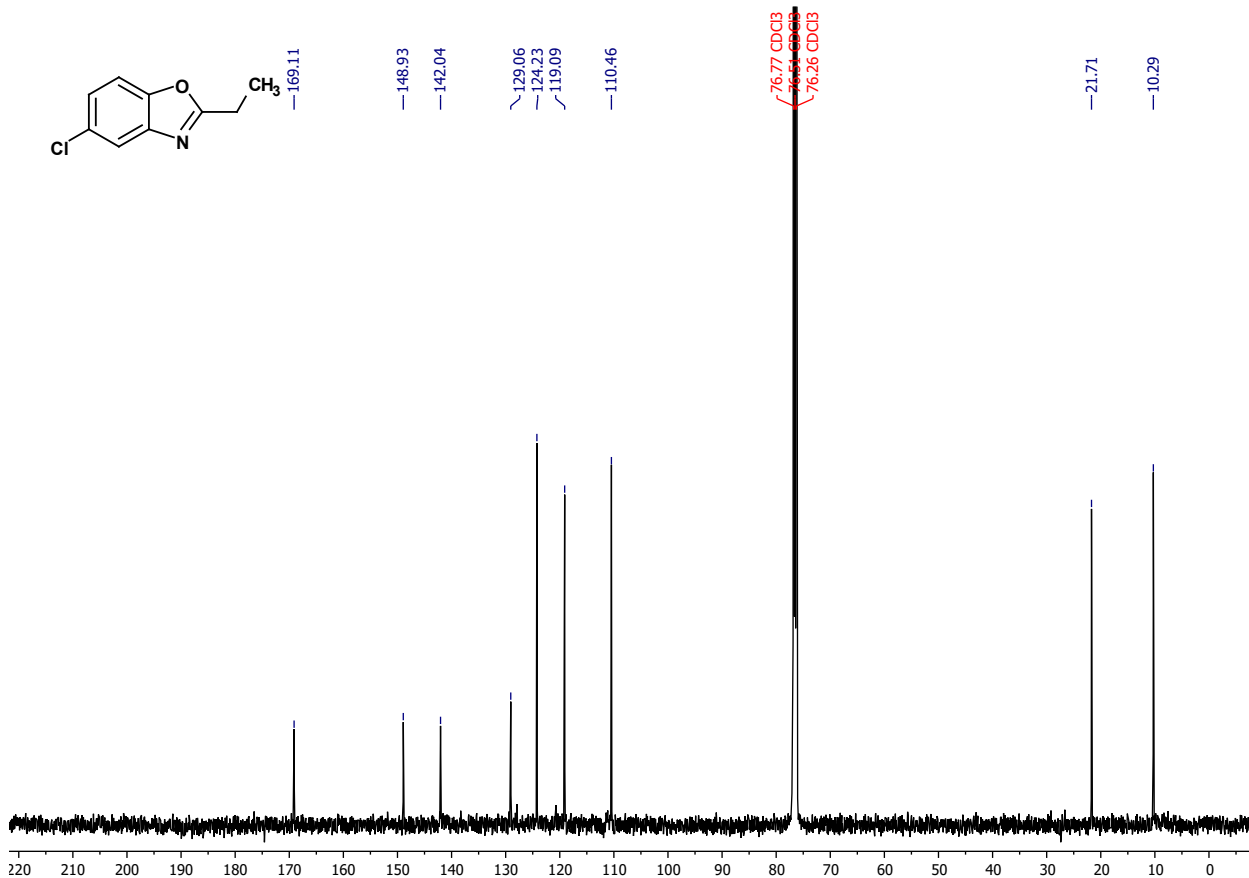

**COSY** NMR 5-chloro-2-ethylbenzo[d]oxazole (**3ii**)

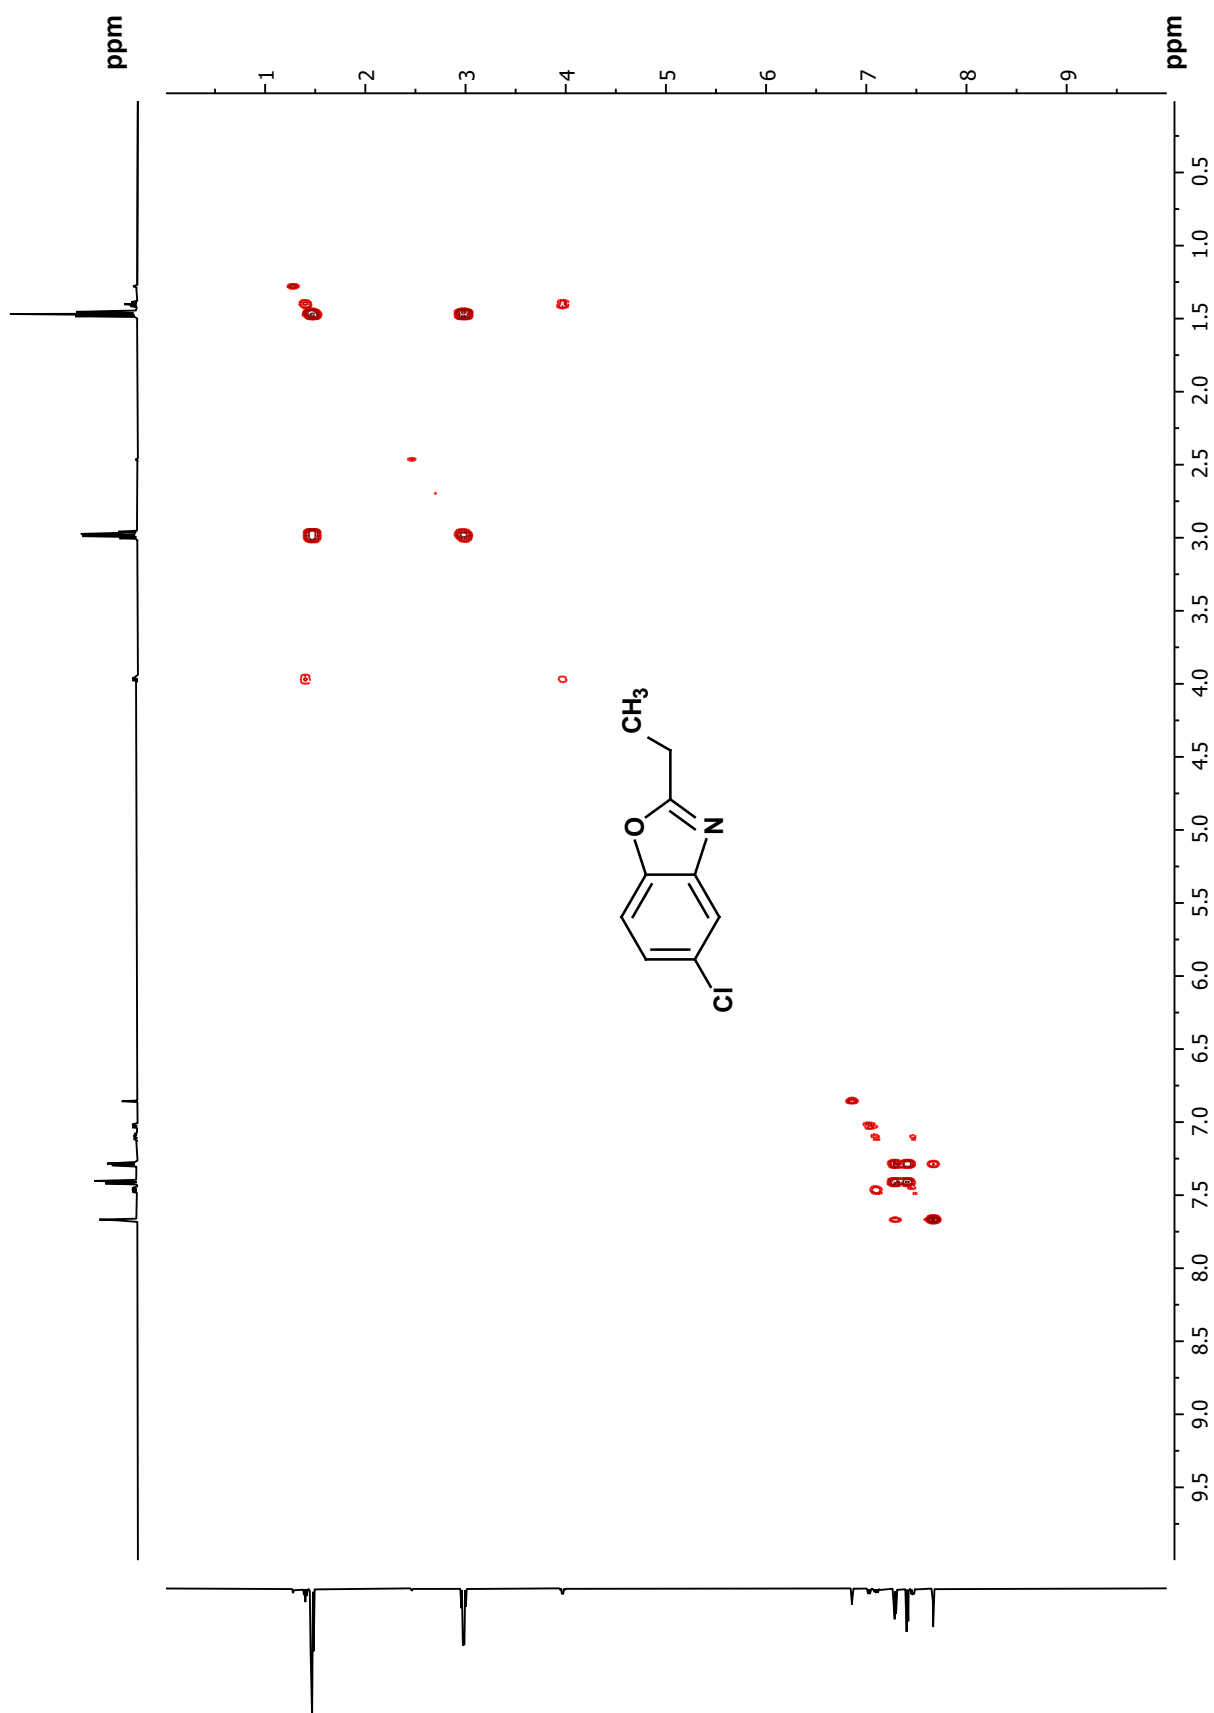

HSQC NMR 5-chloro-2-ethylbenzo[d]oxazole (3ii)

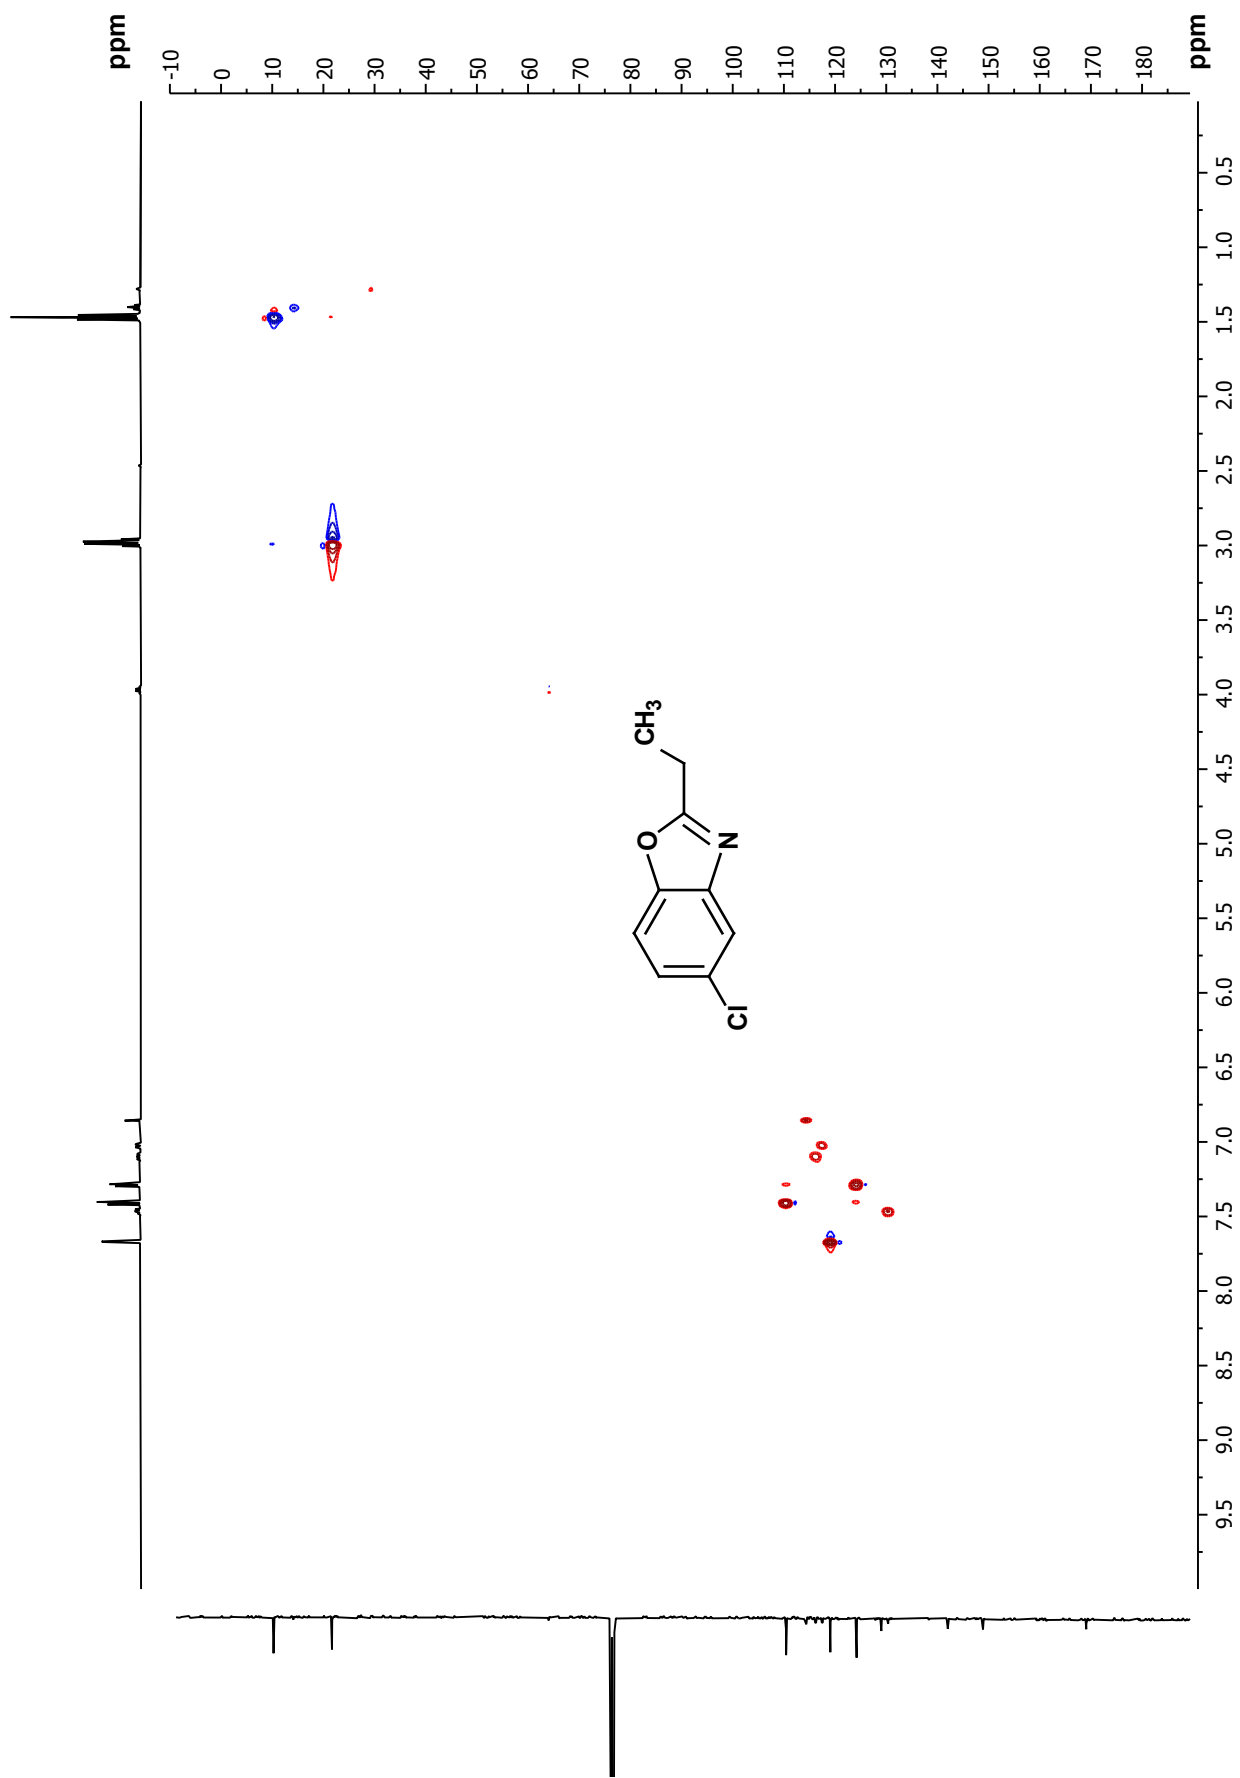

HMBC NMR 5-chloro-2-ethylbenzo[d]oxazole (3ii)

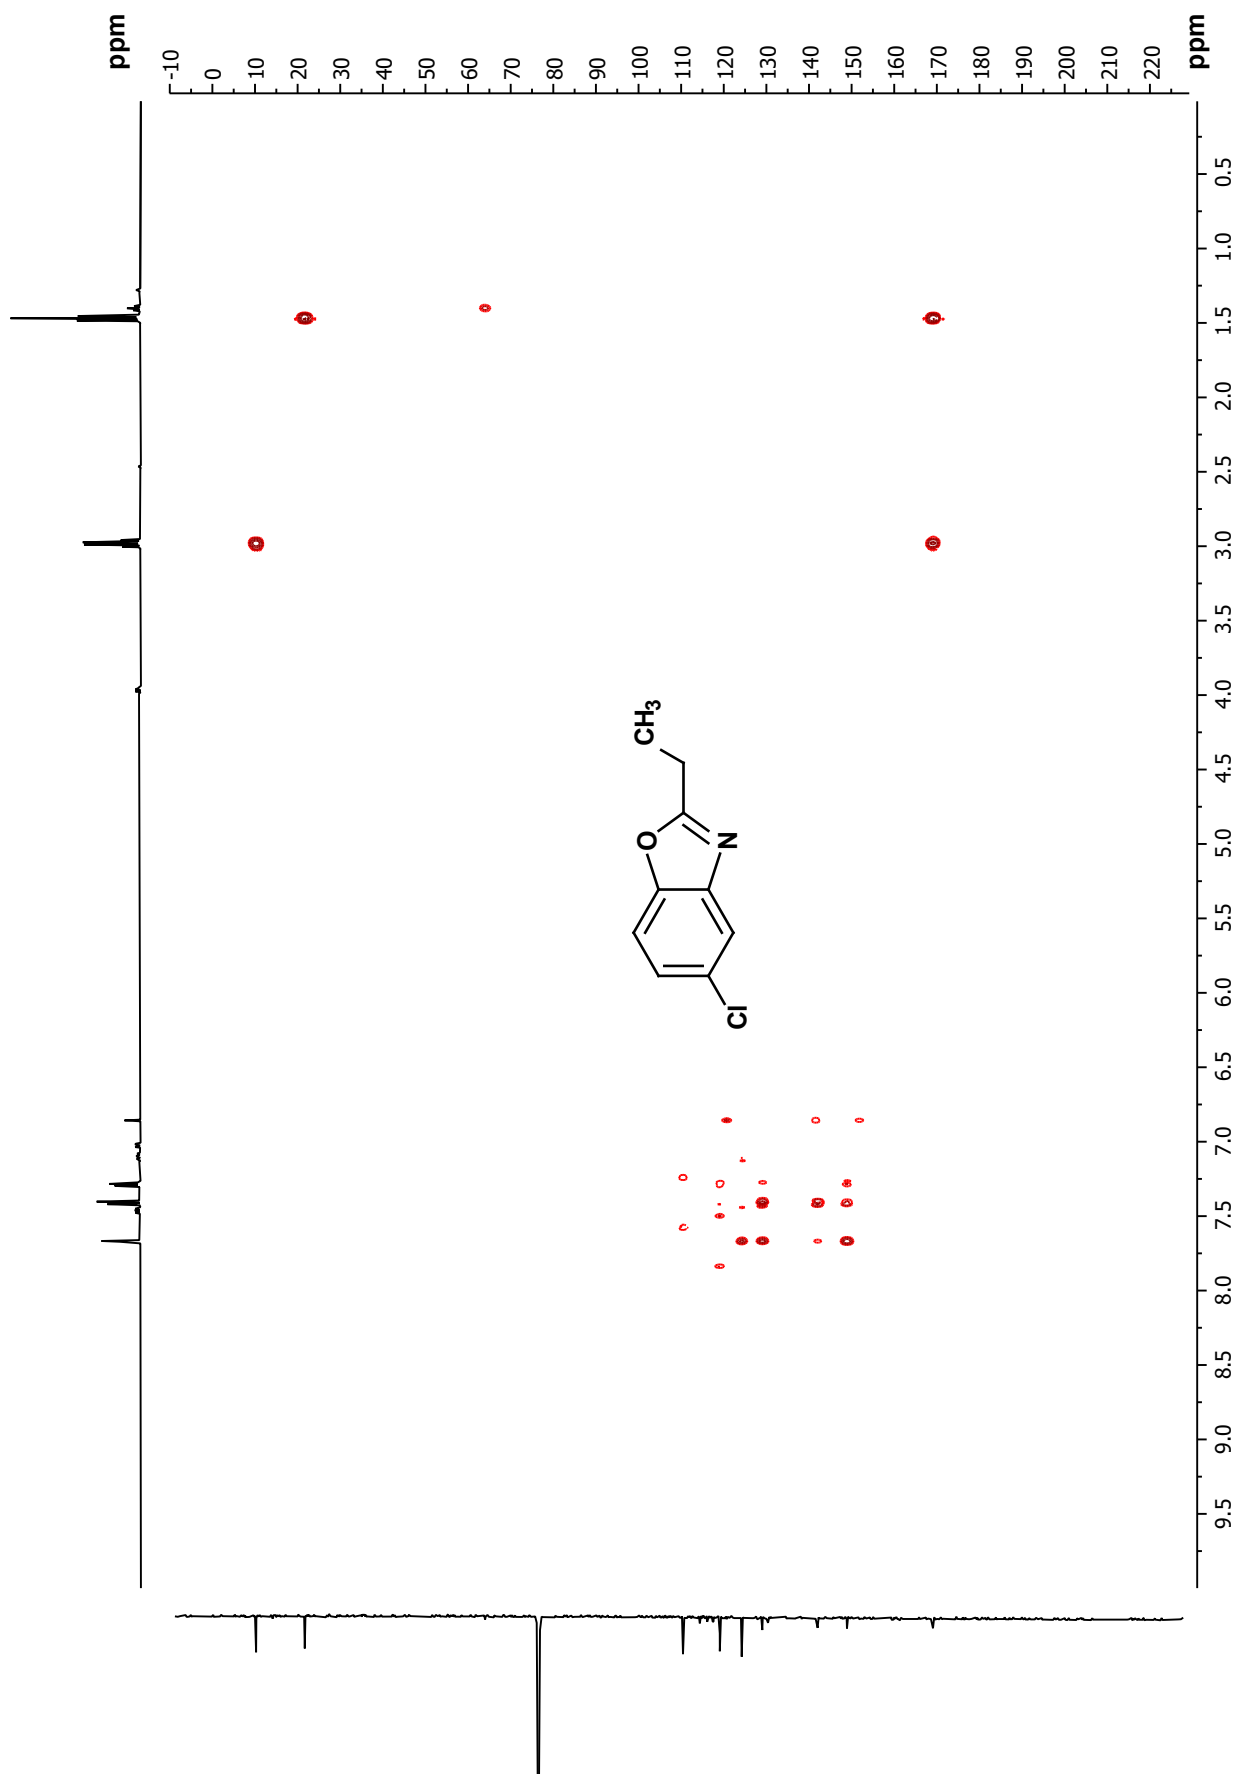

$^1\text{H}$  and  $^{13}\text{C}$  NMR *N*-(5-bromo-5-hydroxyphenyl)propionamide (**3j**)

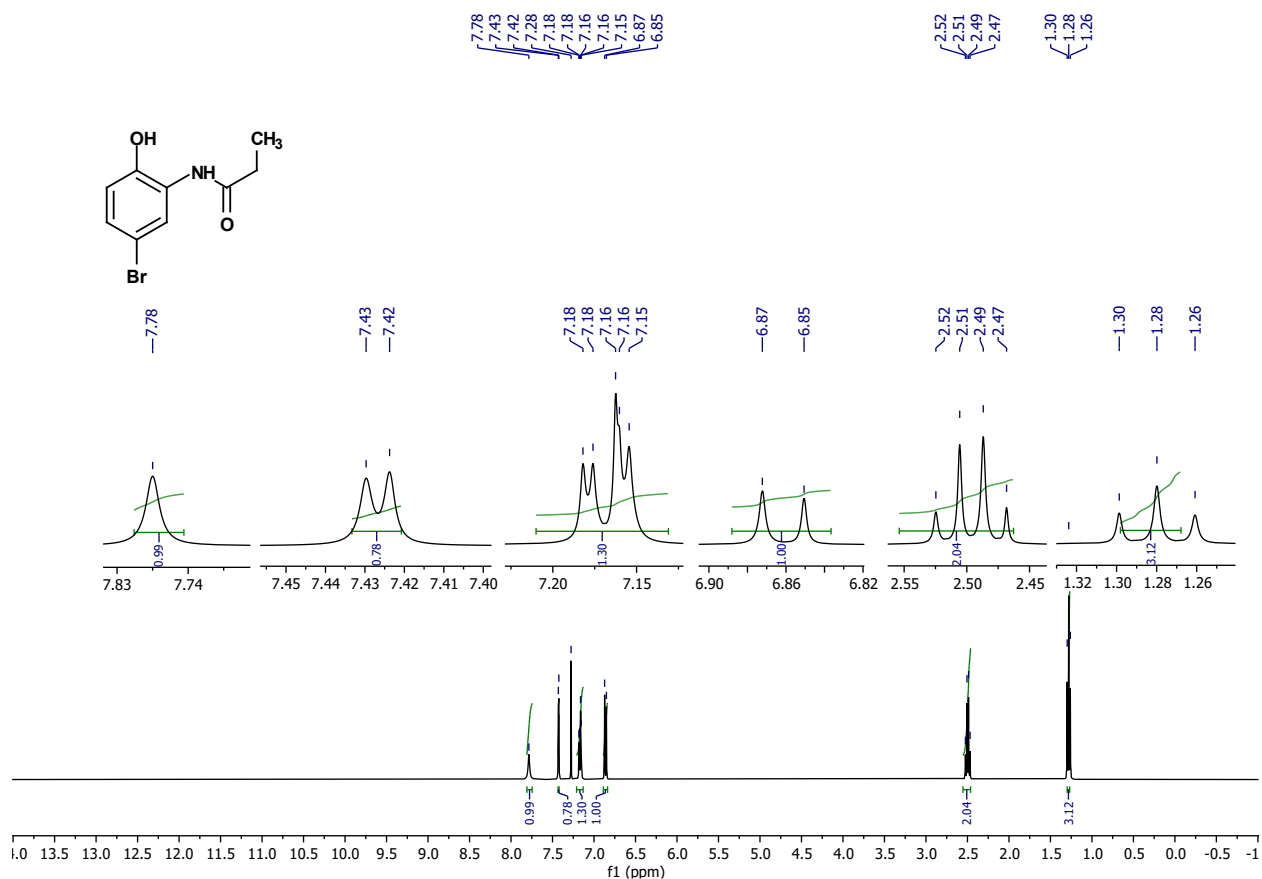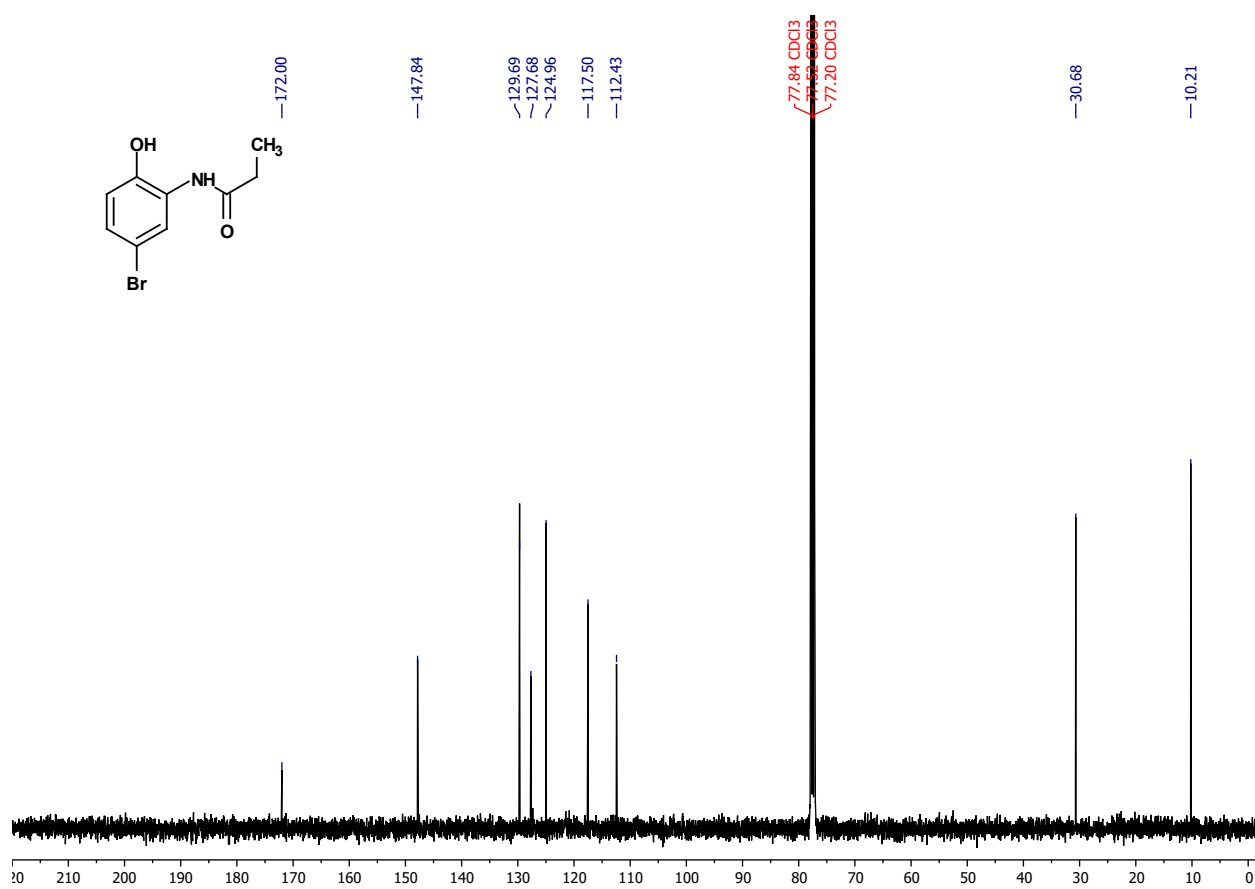

$^1\text{H}$  and  $^{13}\text{C}$  NMR 5-bromo-2-ethylbenzo[d]oxazole (**3jj**)

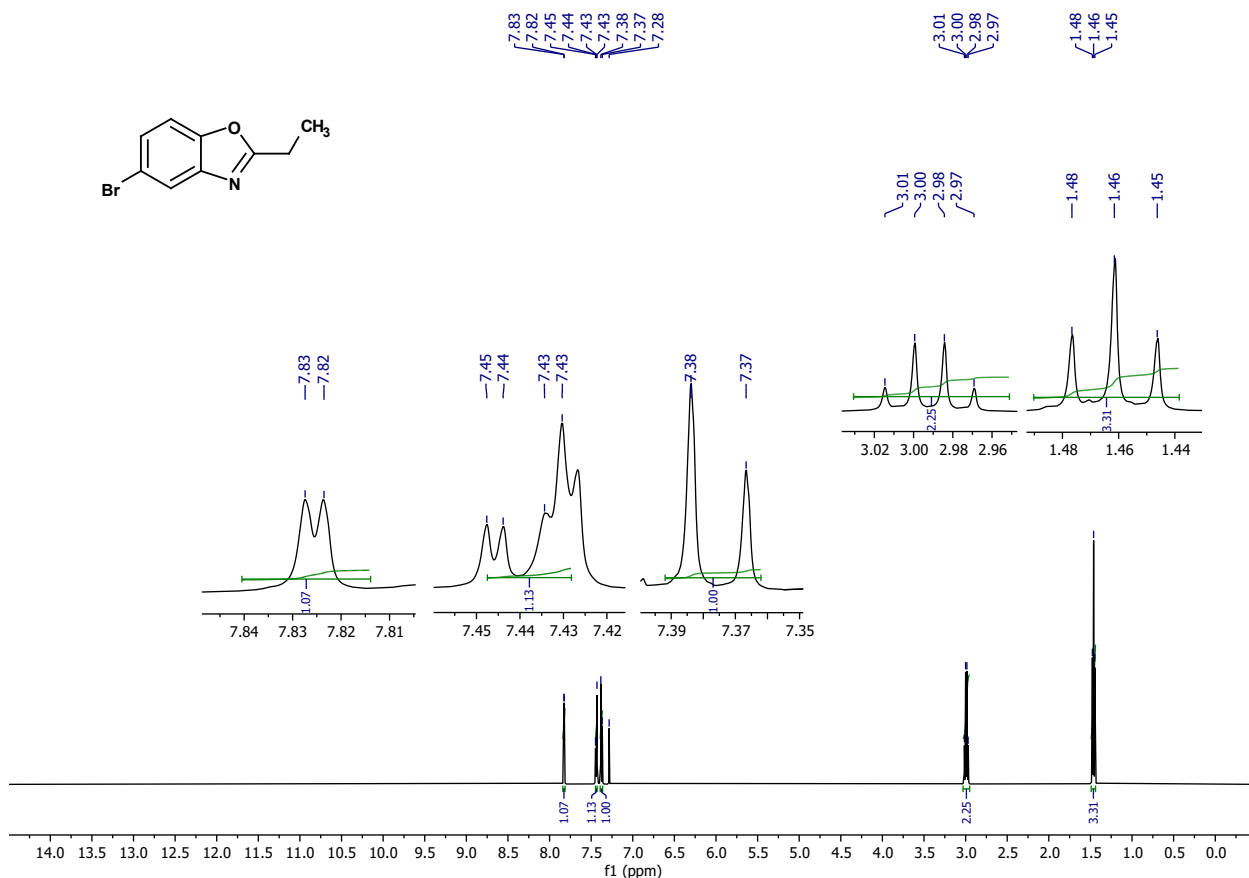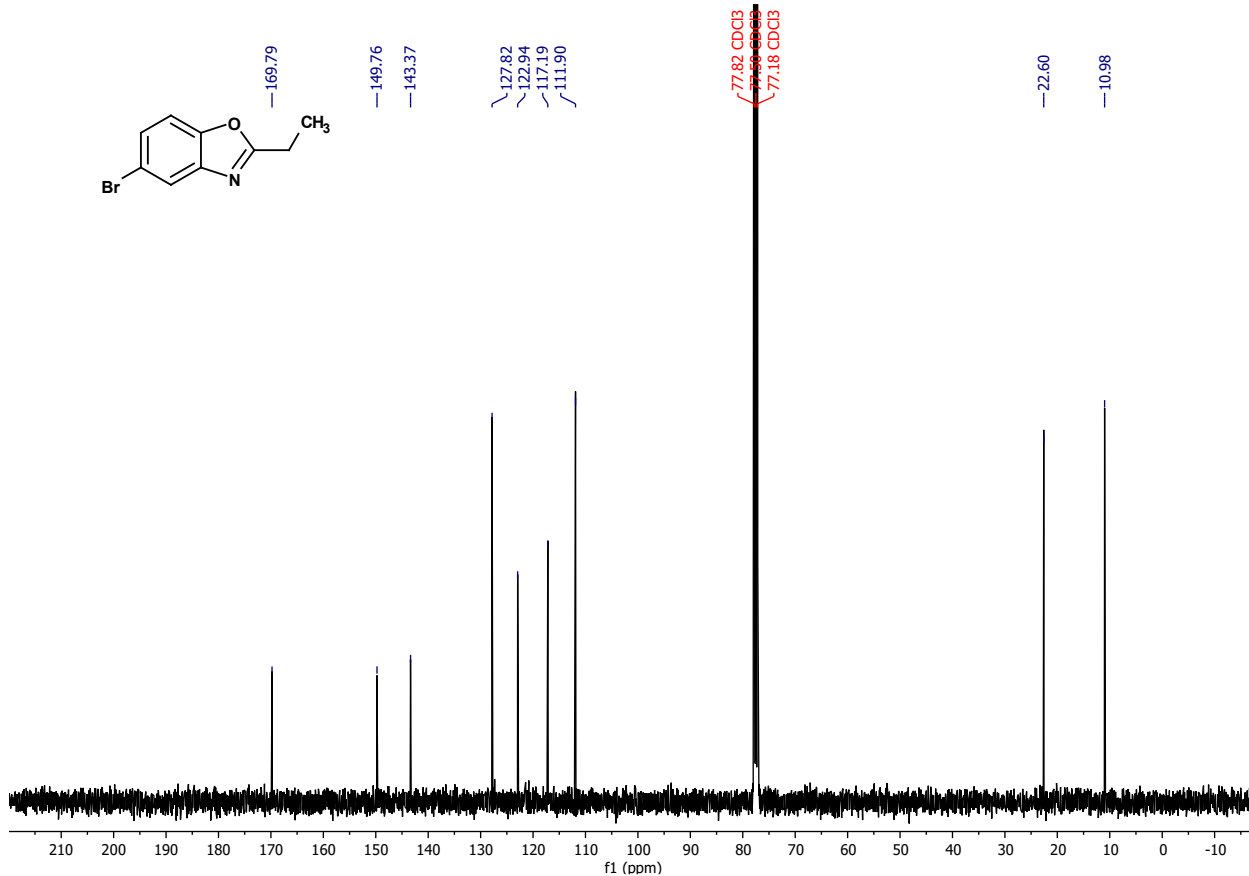

$^1\text{H}$  and  $^{13}\text{C}$  NMR *N*-phenylpropionamide (**3k**)

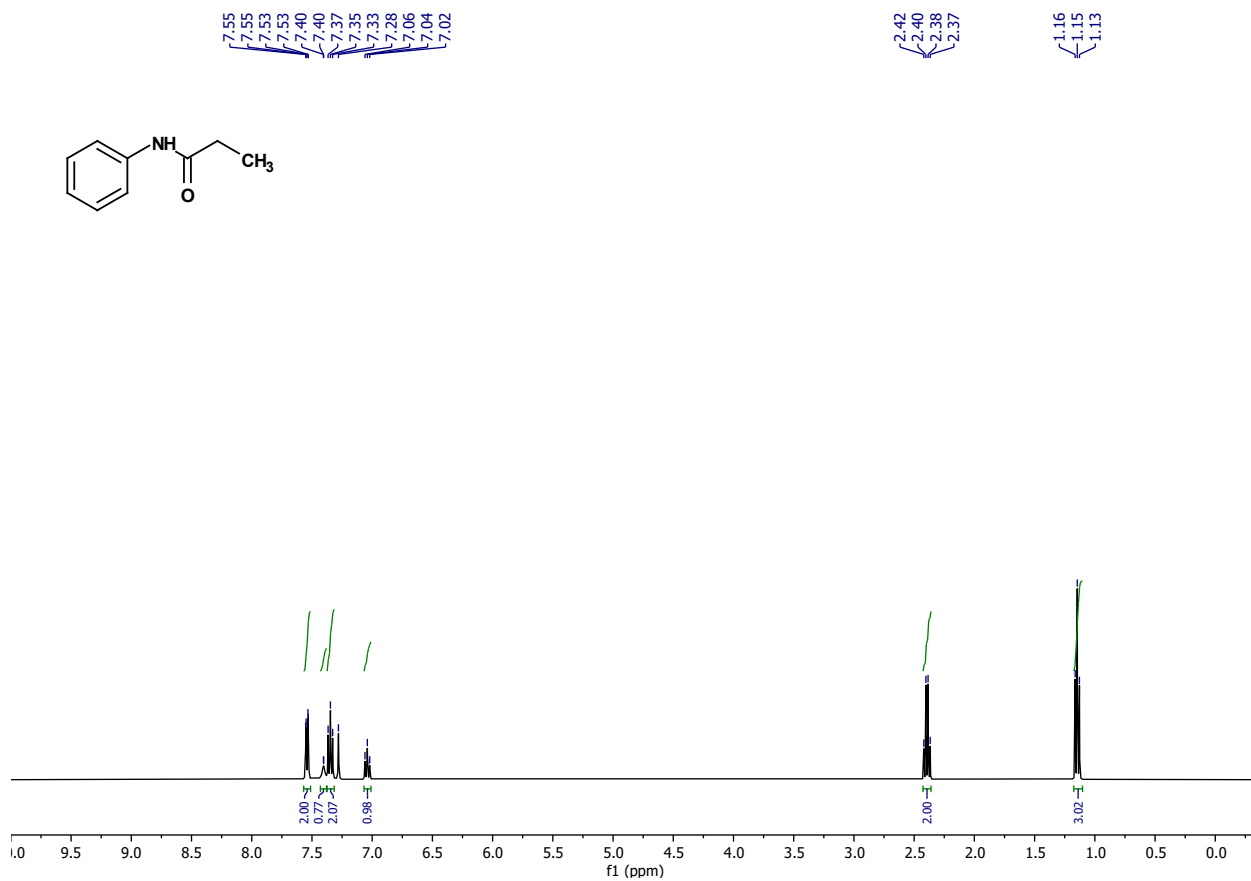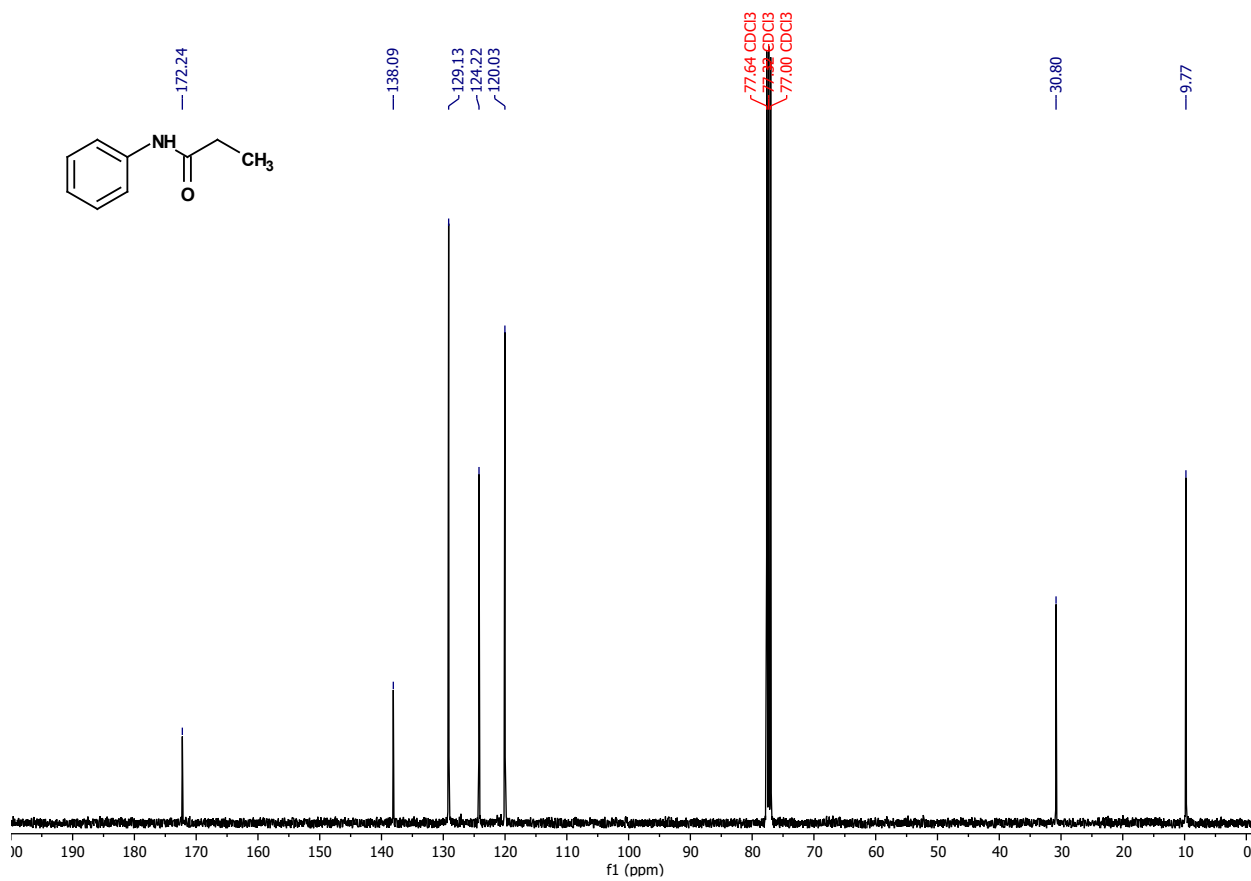



$^1\text{H}$  and  $^{13}\text{C}$  NMR *N*-(2-cyanophenyl)propionamide (**31-a**)

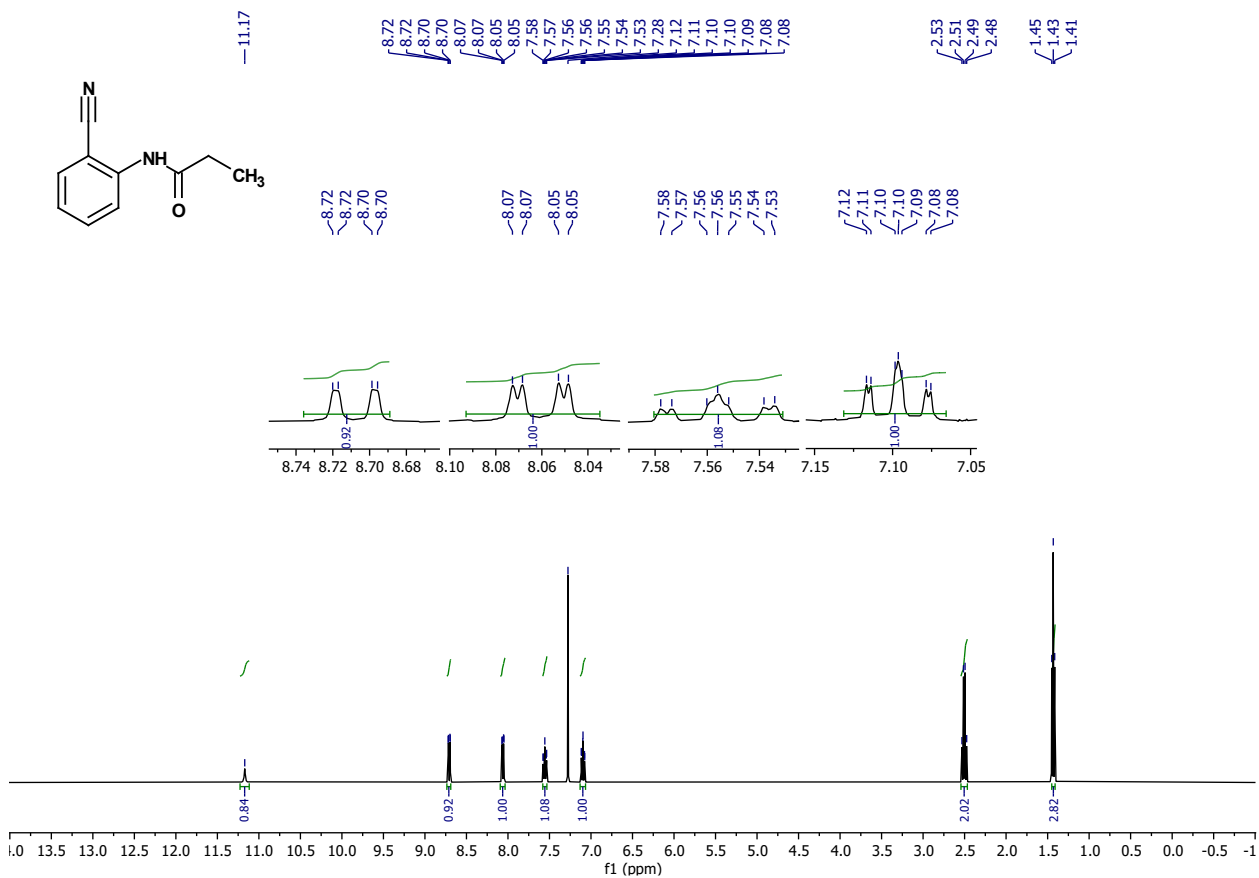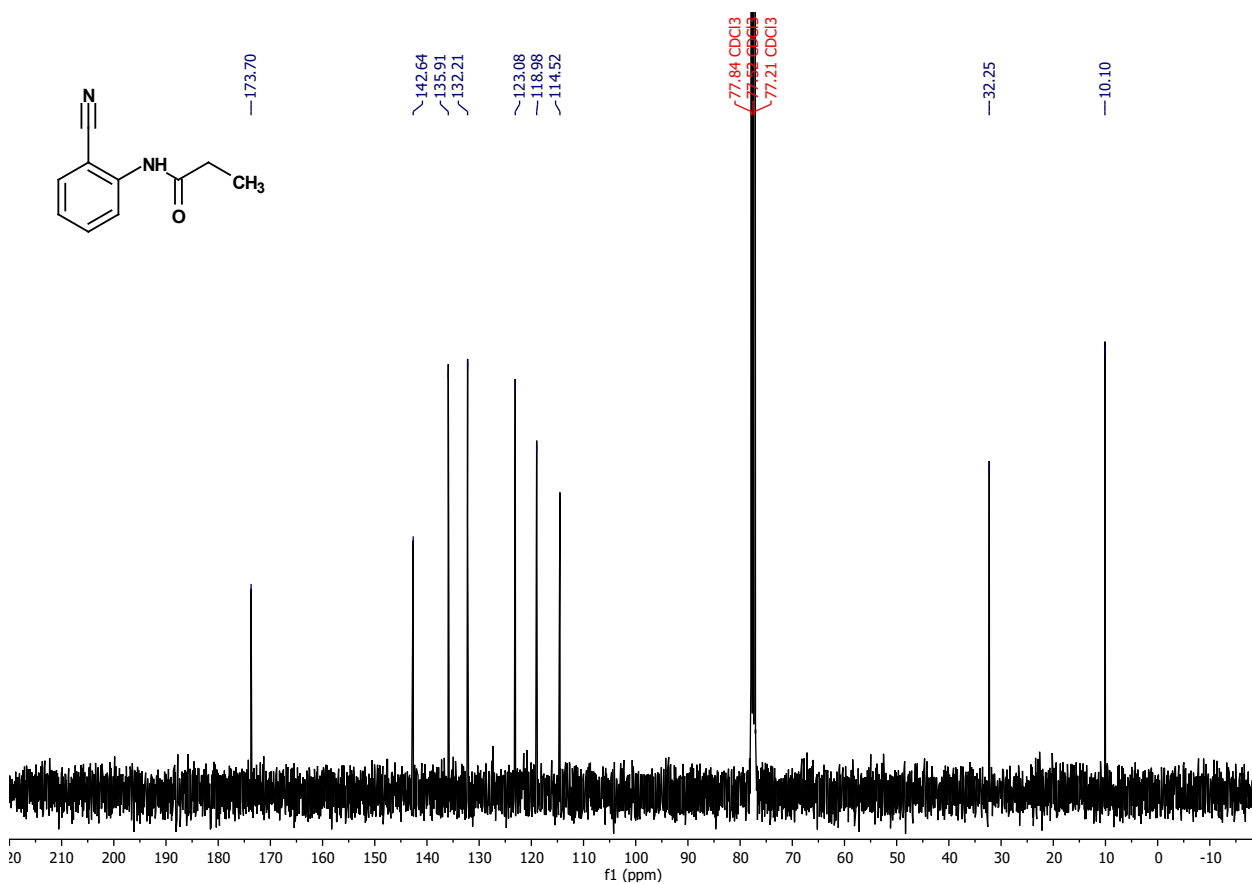

$^1\text{H}$  and  $^{13}\text{C}$  NMR *N*-(3-cyanophenyl)propionamide (**31-b**)

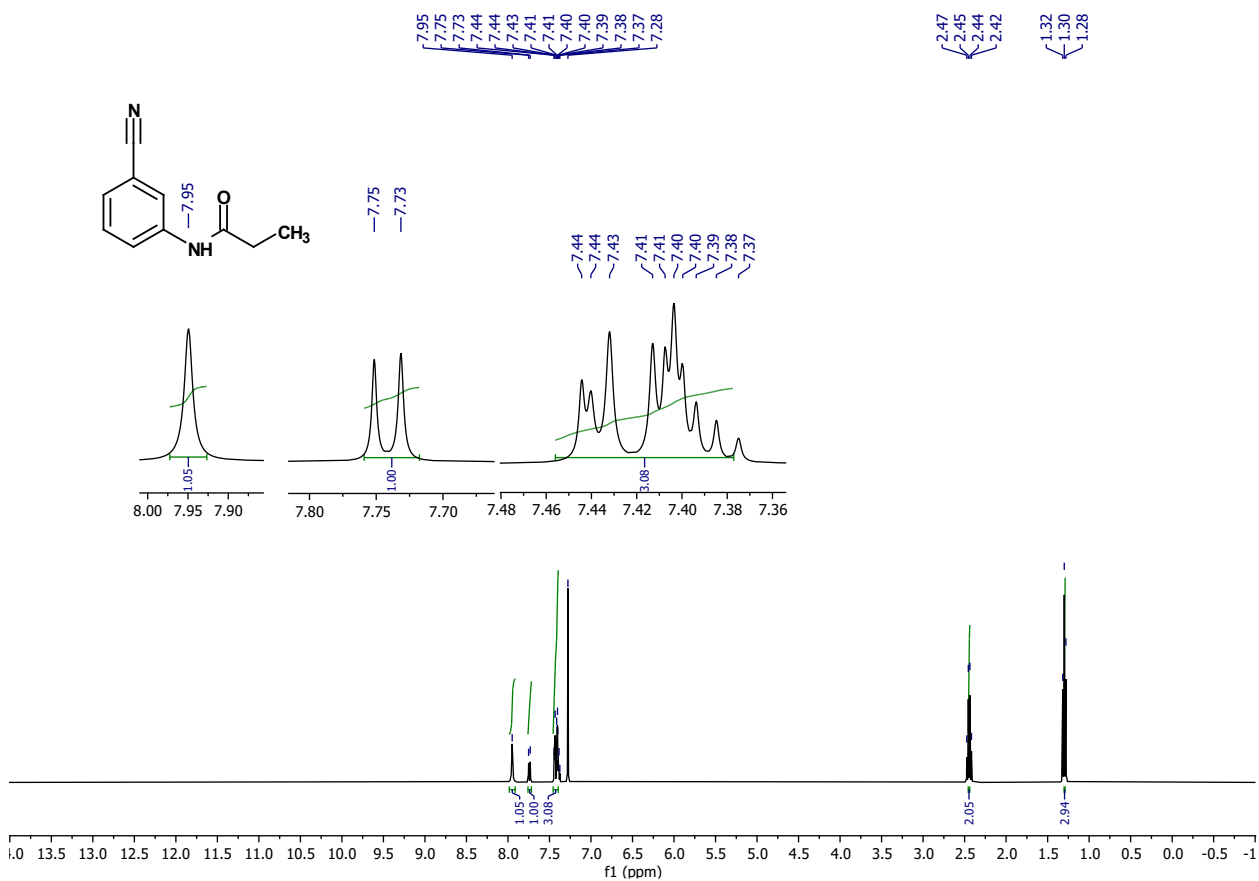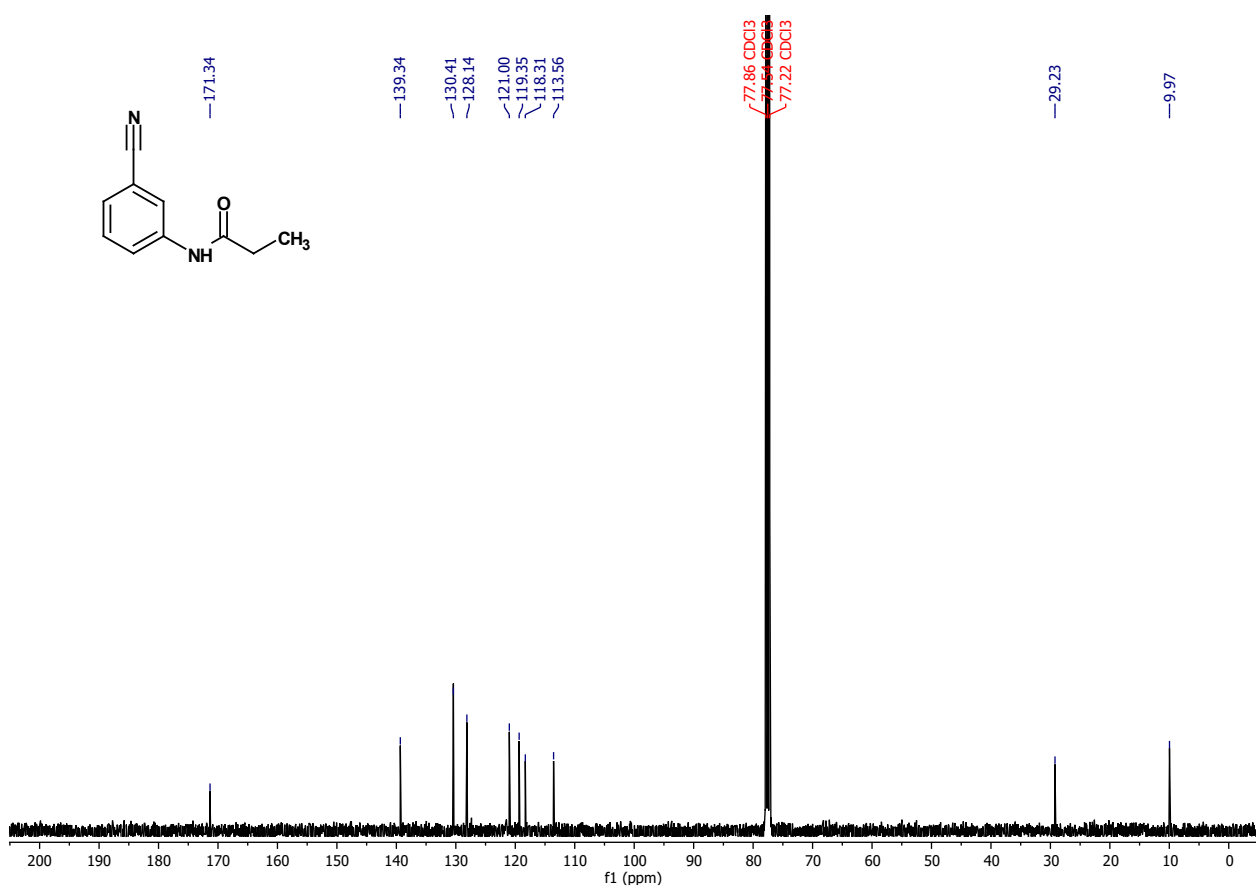

$^1\text{H}$  and  $^{13}\text{C}$  NMR *N*-(4-cyanophenyl)propionamide (**31-c**)

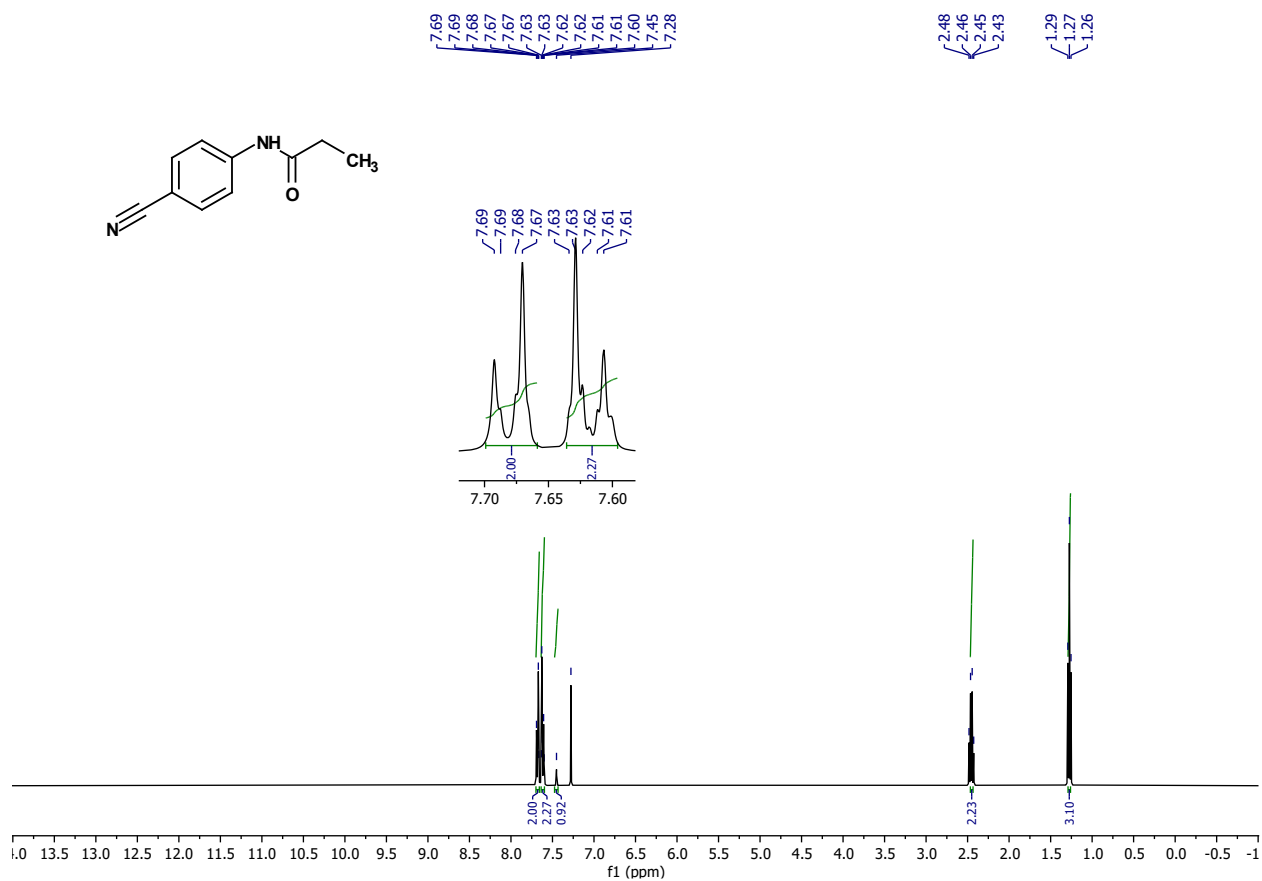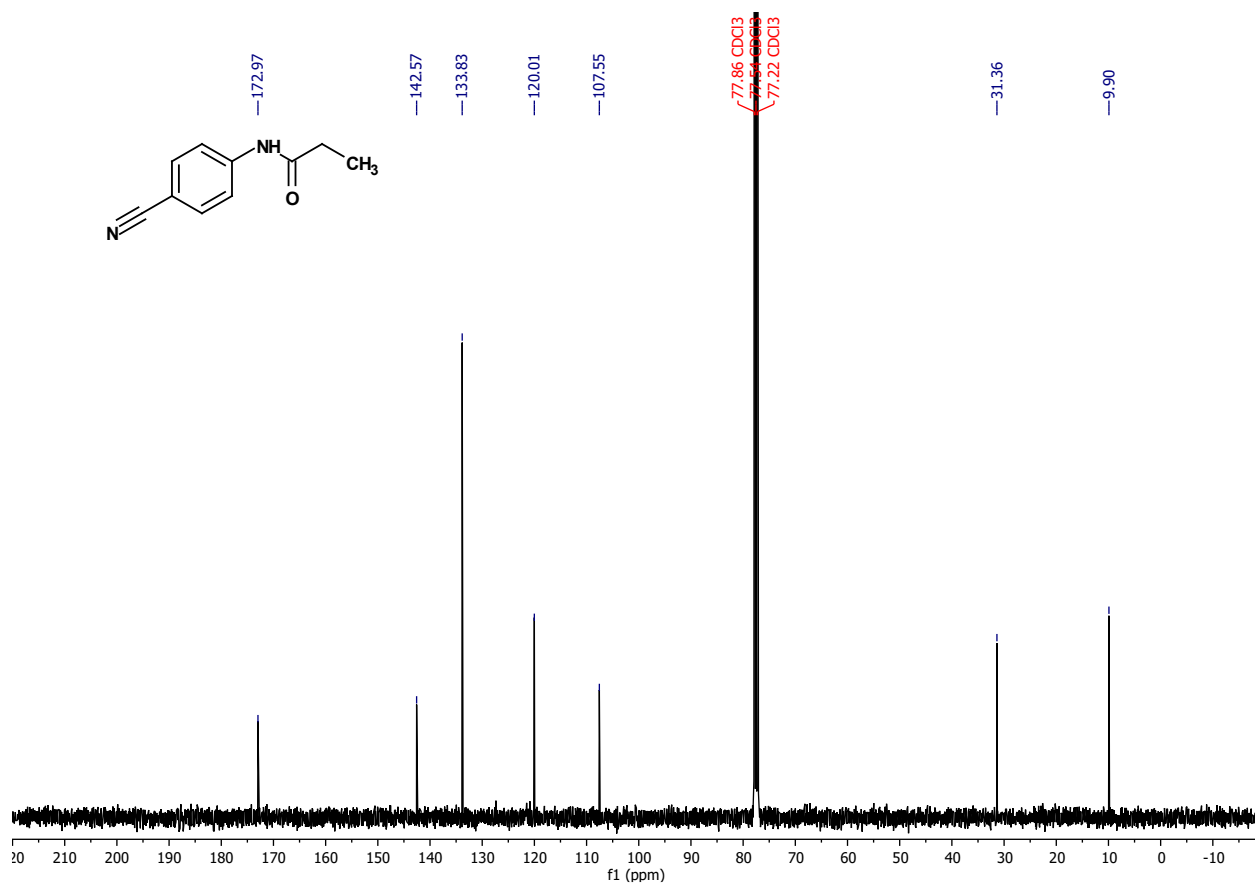

$^1\text{H}$  and  $^{13}\text{C}$  NMR *N*-(2-nitrophenyl)propionamide (**3m-a**)

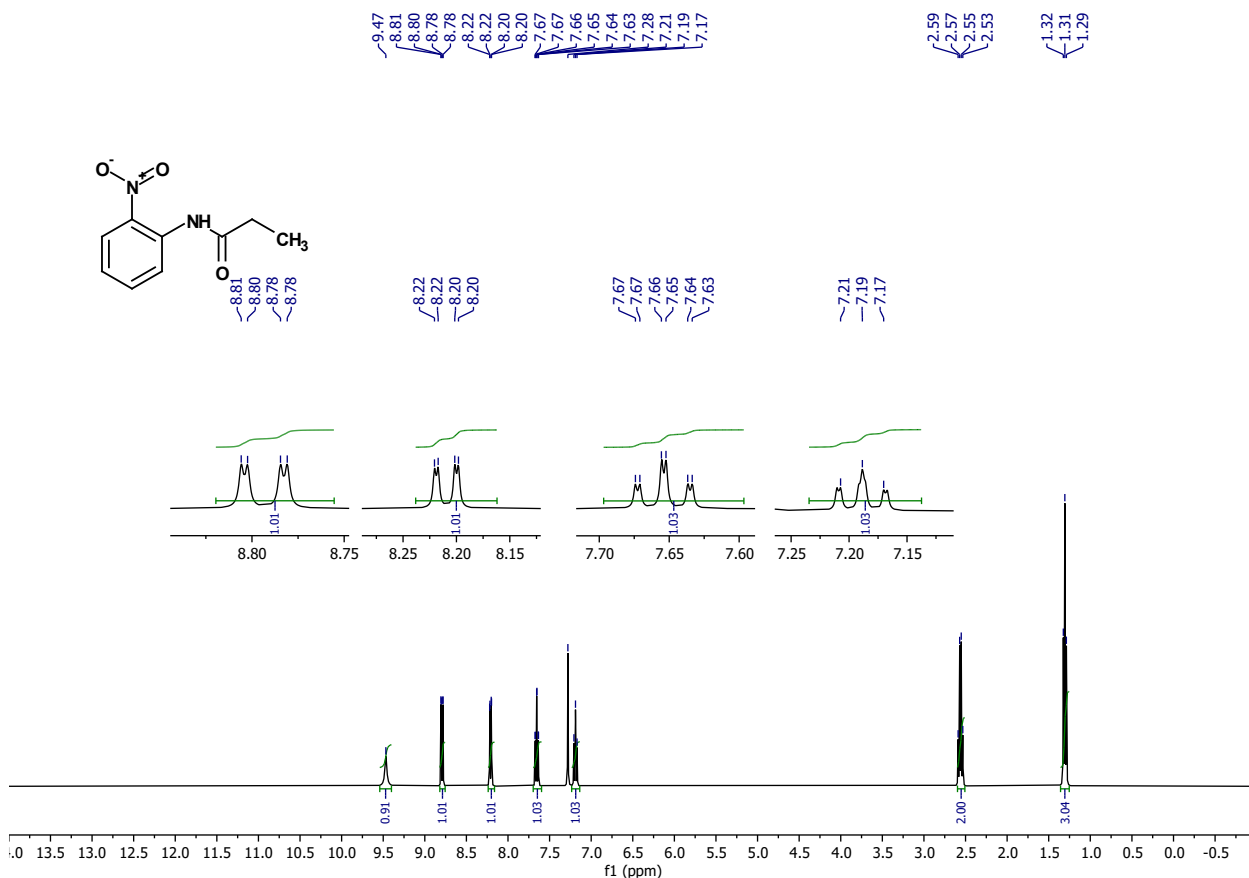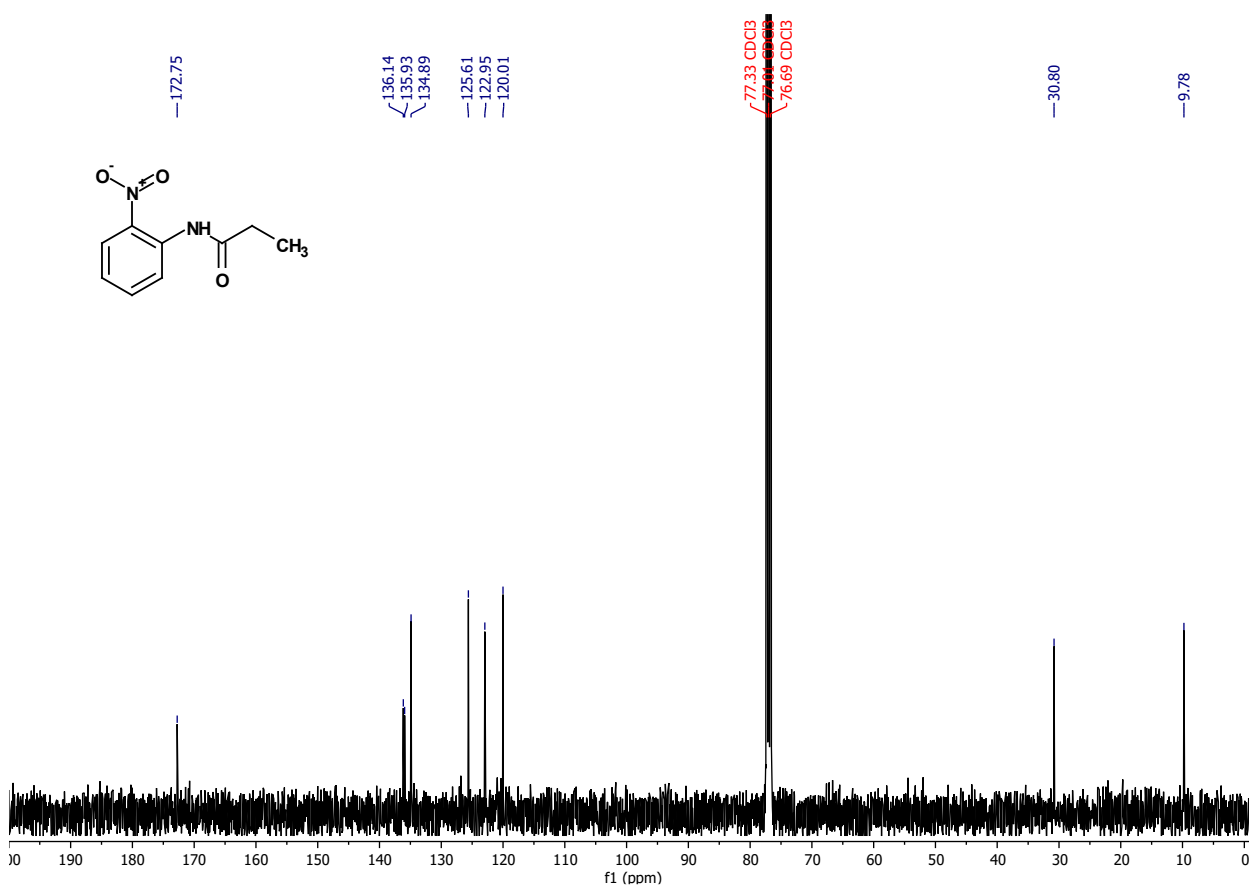

$^1\text{H}$  and  $^{13}\text{C}$  NMR *N*-(3-nitrophenyl)propionamide (**3m-b**)

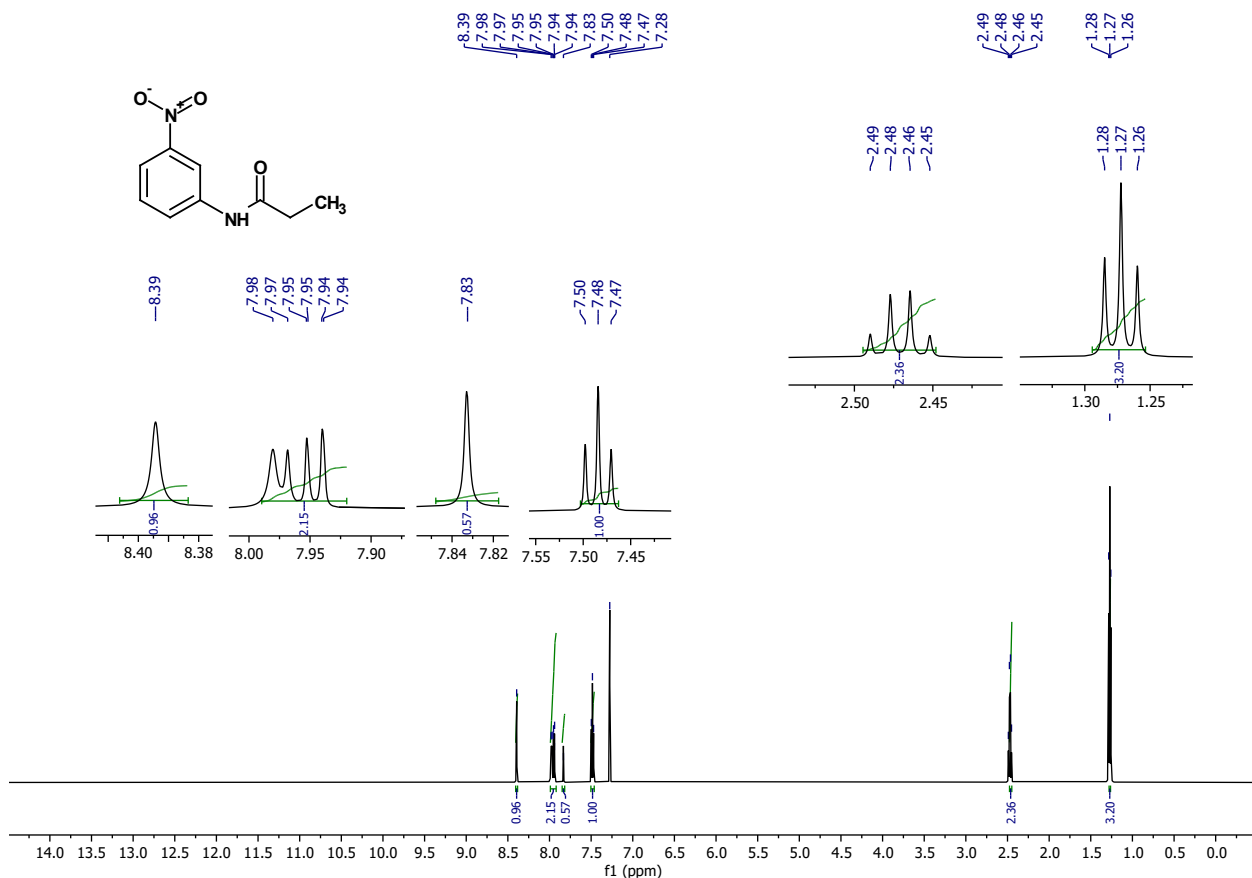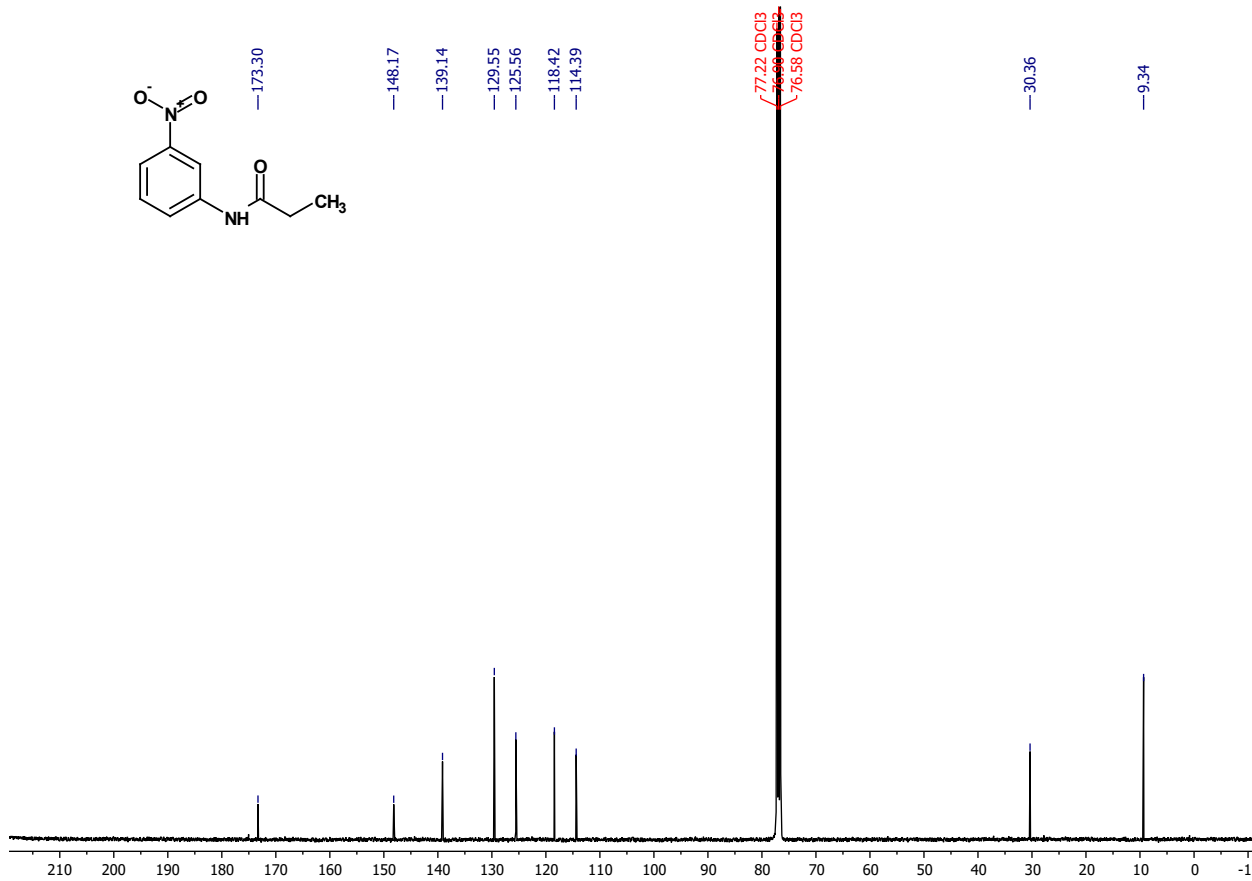

$^1\text{H}$  and  $^{13}\text{C}$  NMR *N*-(4-nitrophenyl)propionamide (**3m-c**)

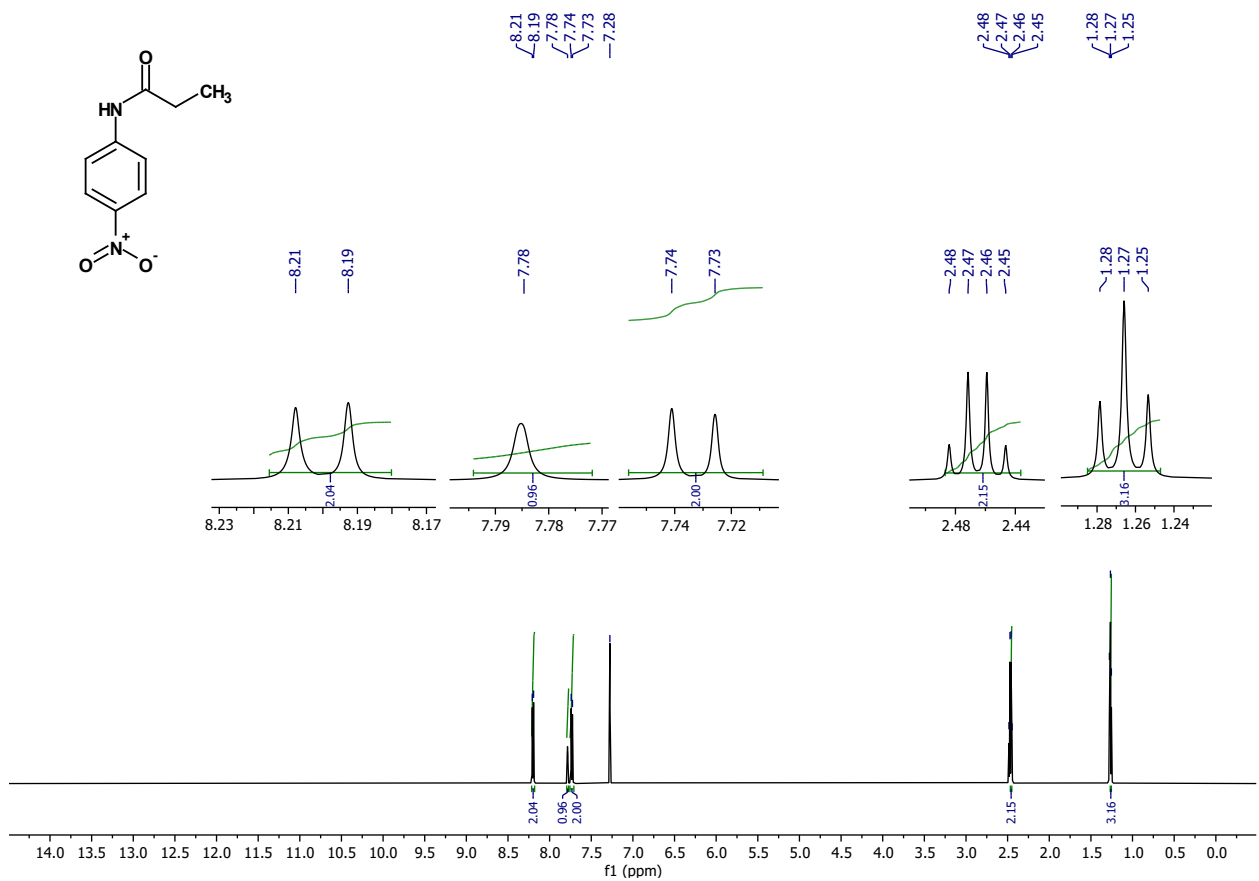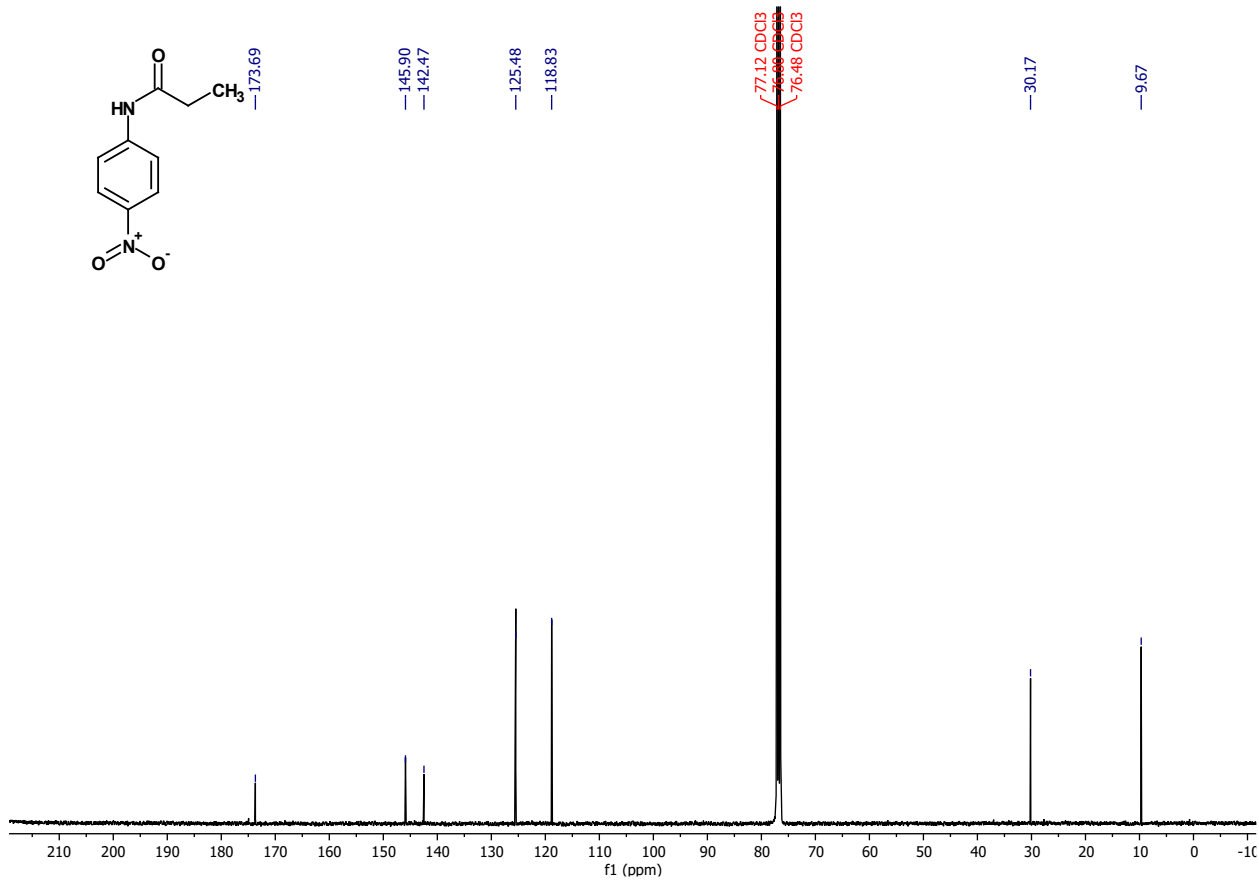

$^1\text{H}$  and  $^{13}\text{C}$  NMR *N*-(4-chloro-3-nitrophenyl)propionamide (**3n-a**) + *N*-(2-chloro-3-nitrophenyl)propionamide (**3n-b**)

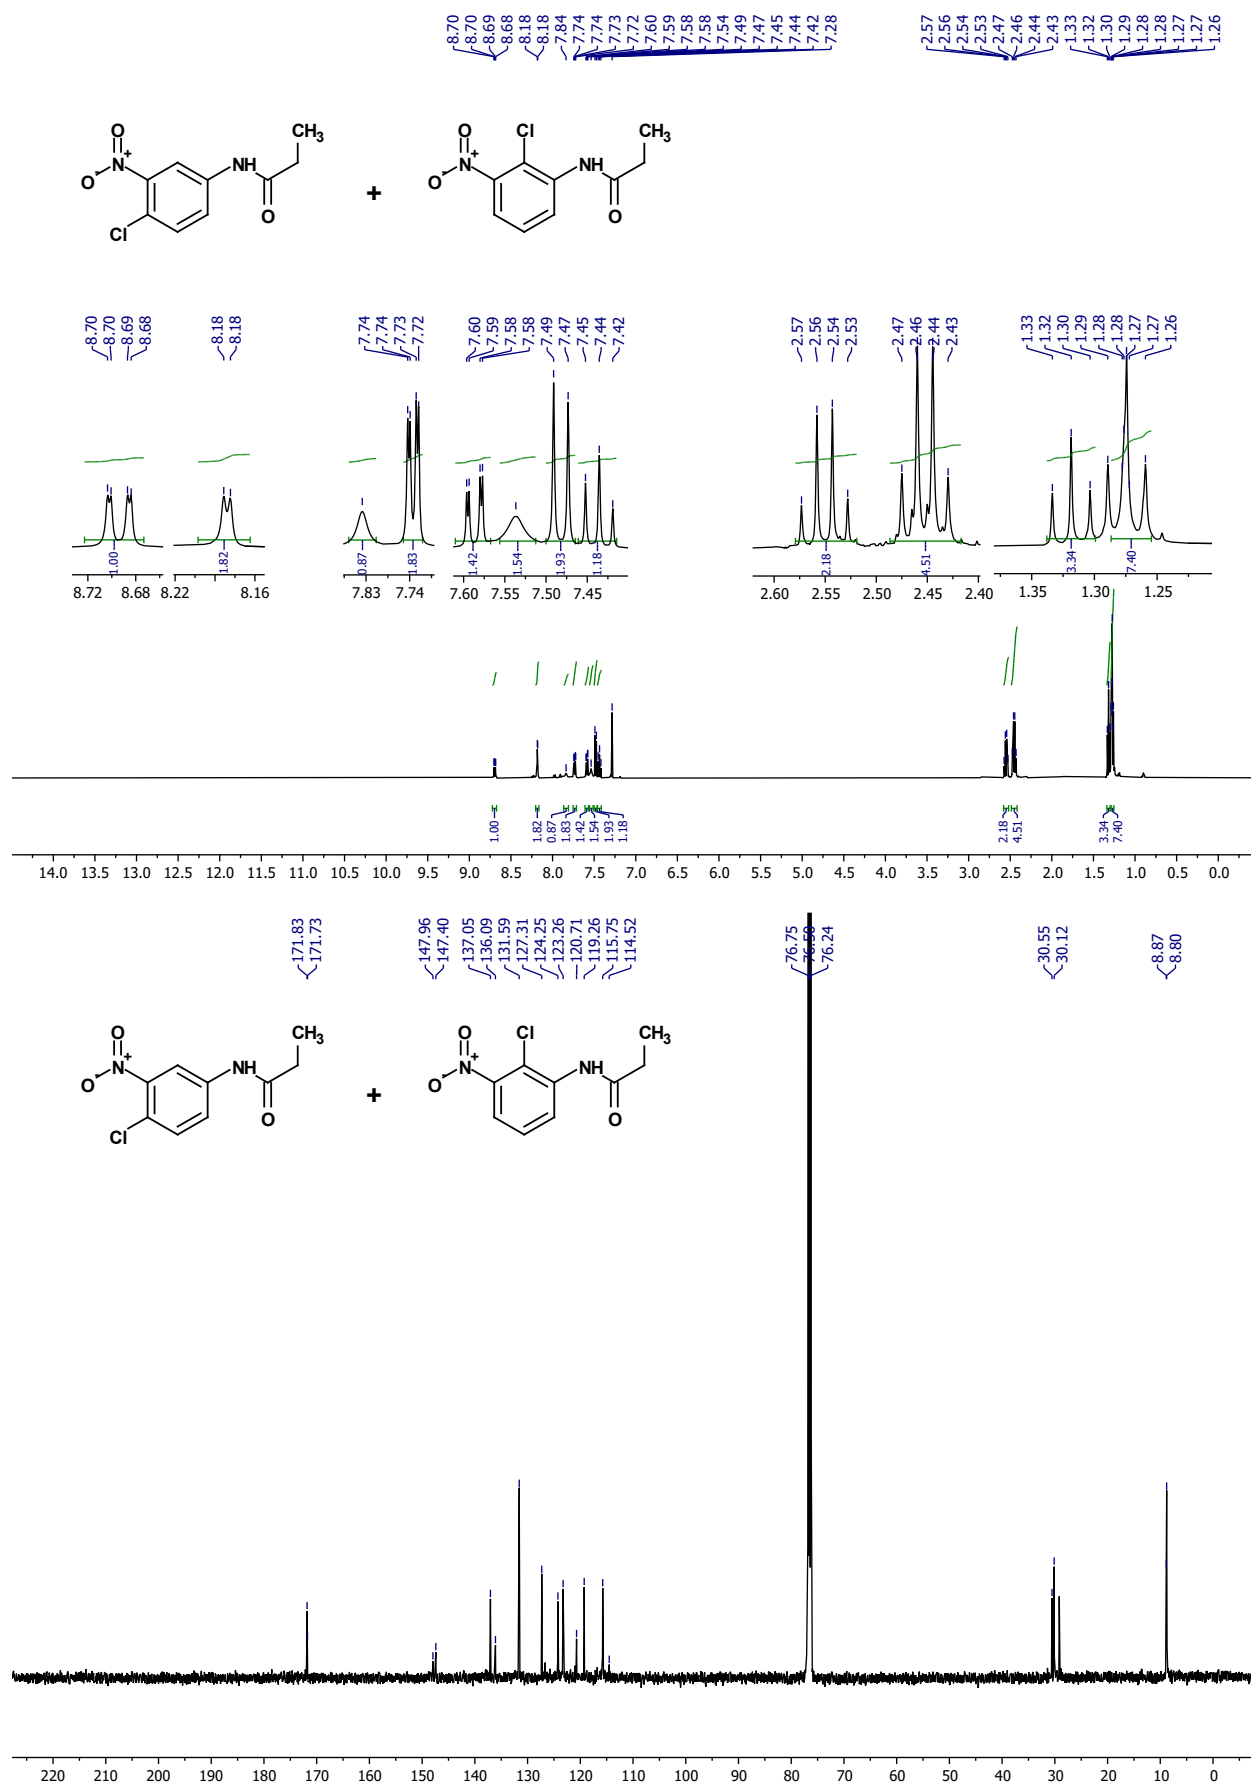

**COSY** NMR *N*-(4-chloro-3-nitrophenyl)propionamide (**3n-a**) + *N*-(2-chloro-3-nitrophenyl)propionamide (**3n-b**)

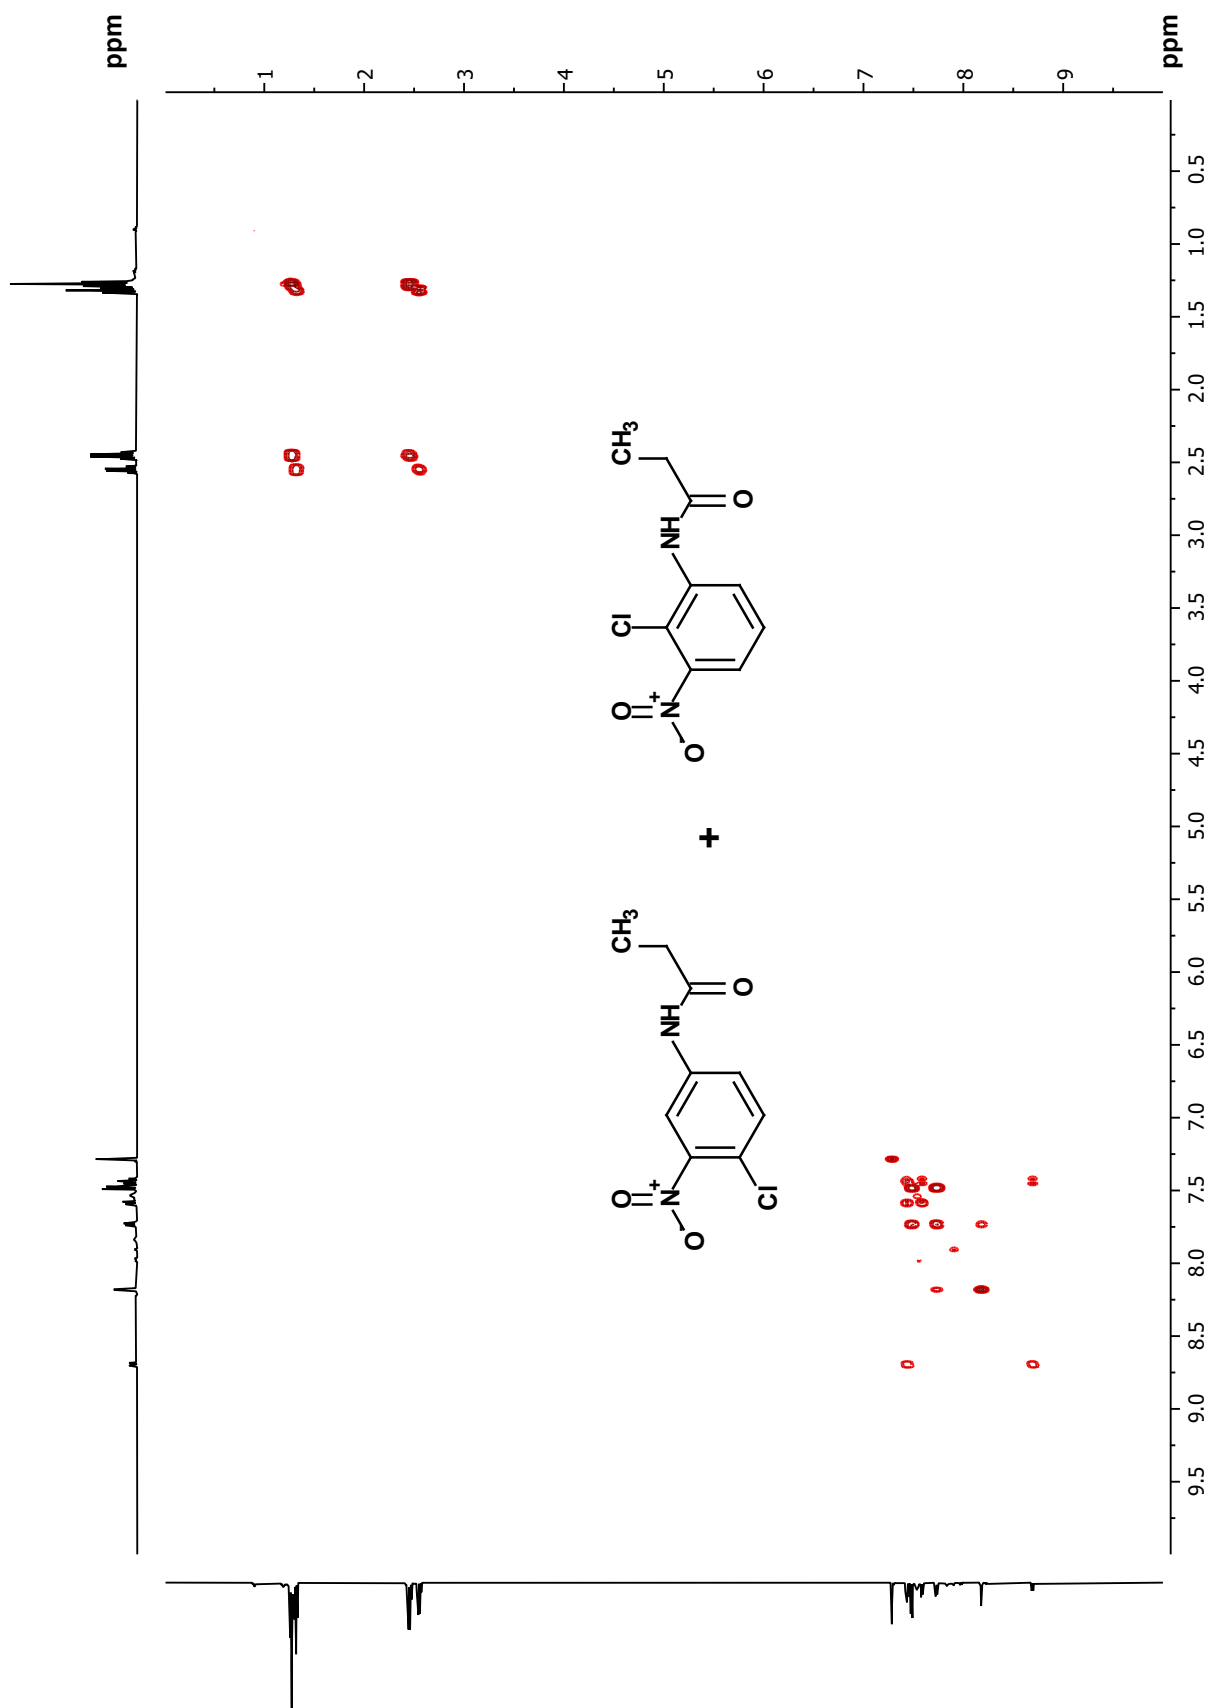



**HSQC** NMR *N*-(4-chloro-3-nitrophenyl)propionamide (**3n-a**) + *N*-(2-chloro-3-nitrophenyl)propionamide (**3n-b**)

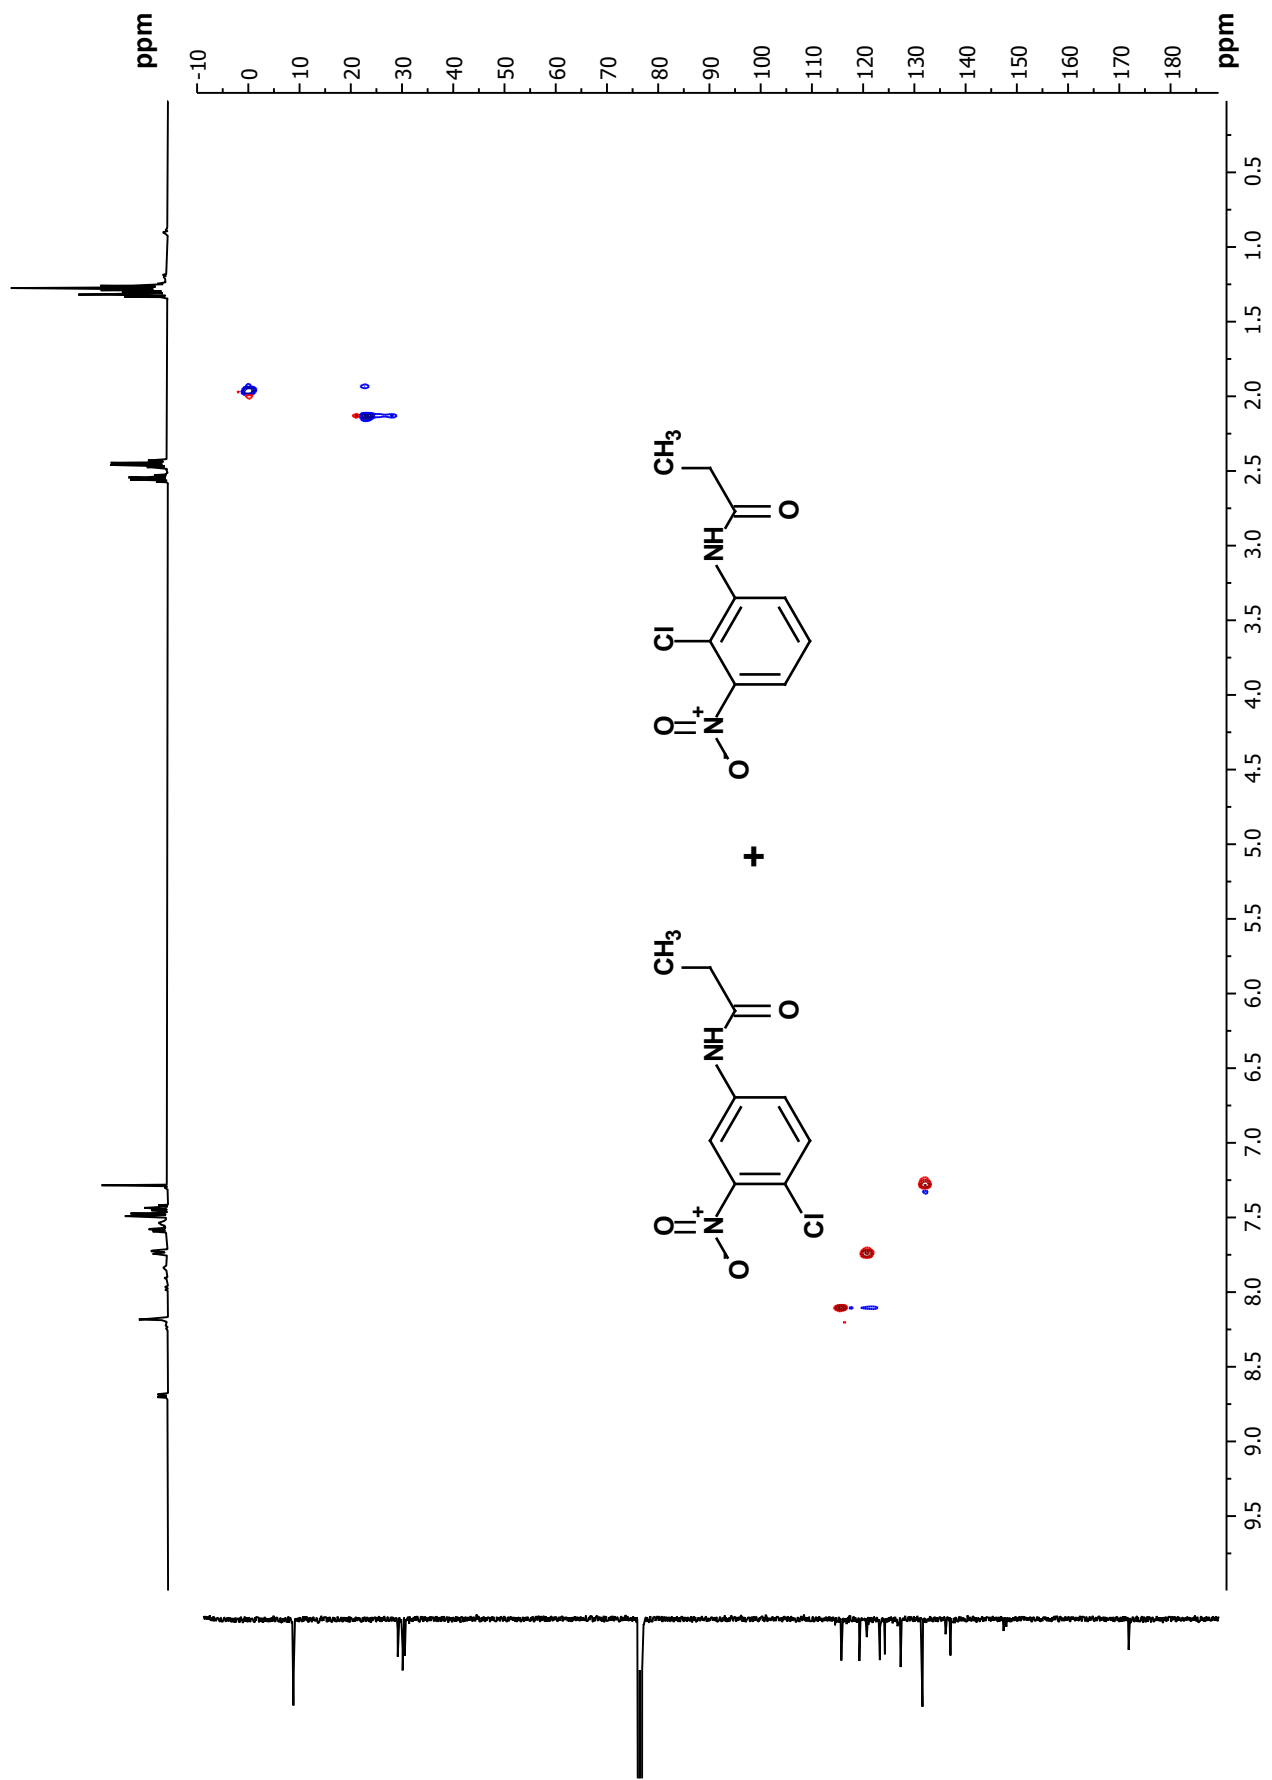

**HMBC** NMR *N*-(4-chloro-3-nitrophenyl)propionamide (**3n-a**) + *N*-(2-chloro-3-nitrophenyl)propionamide (**3n-b**)

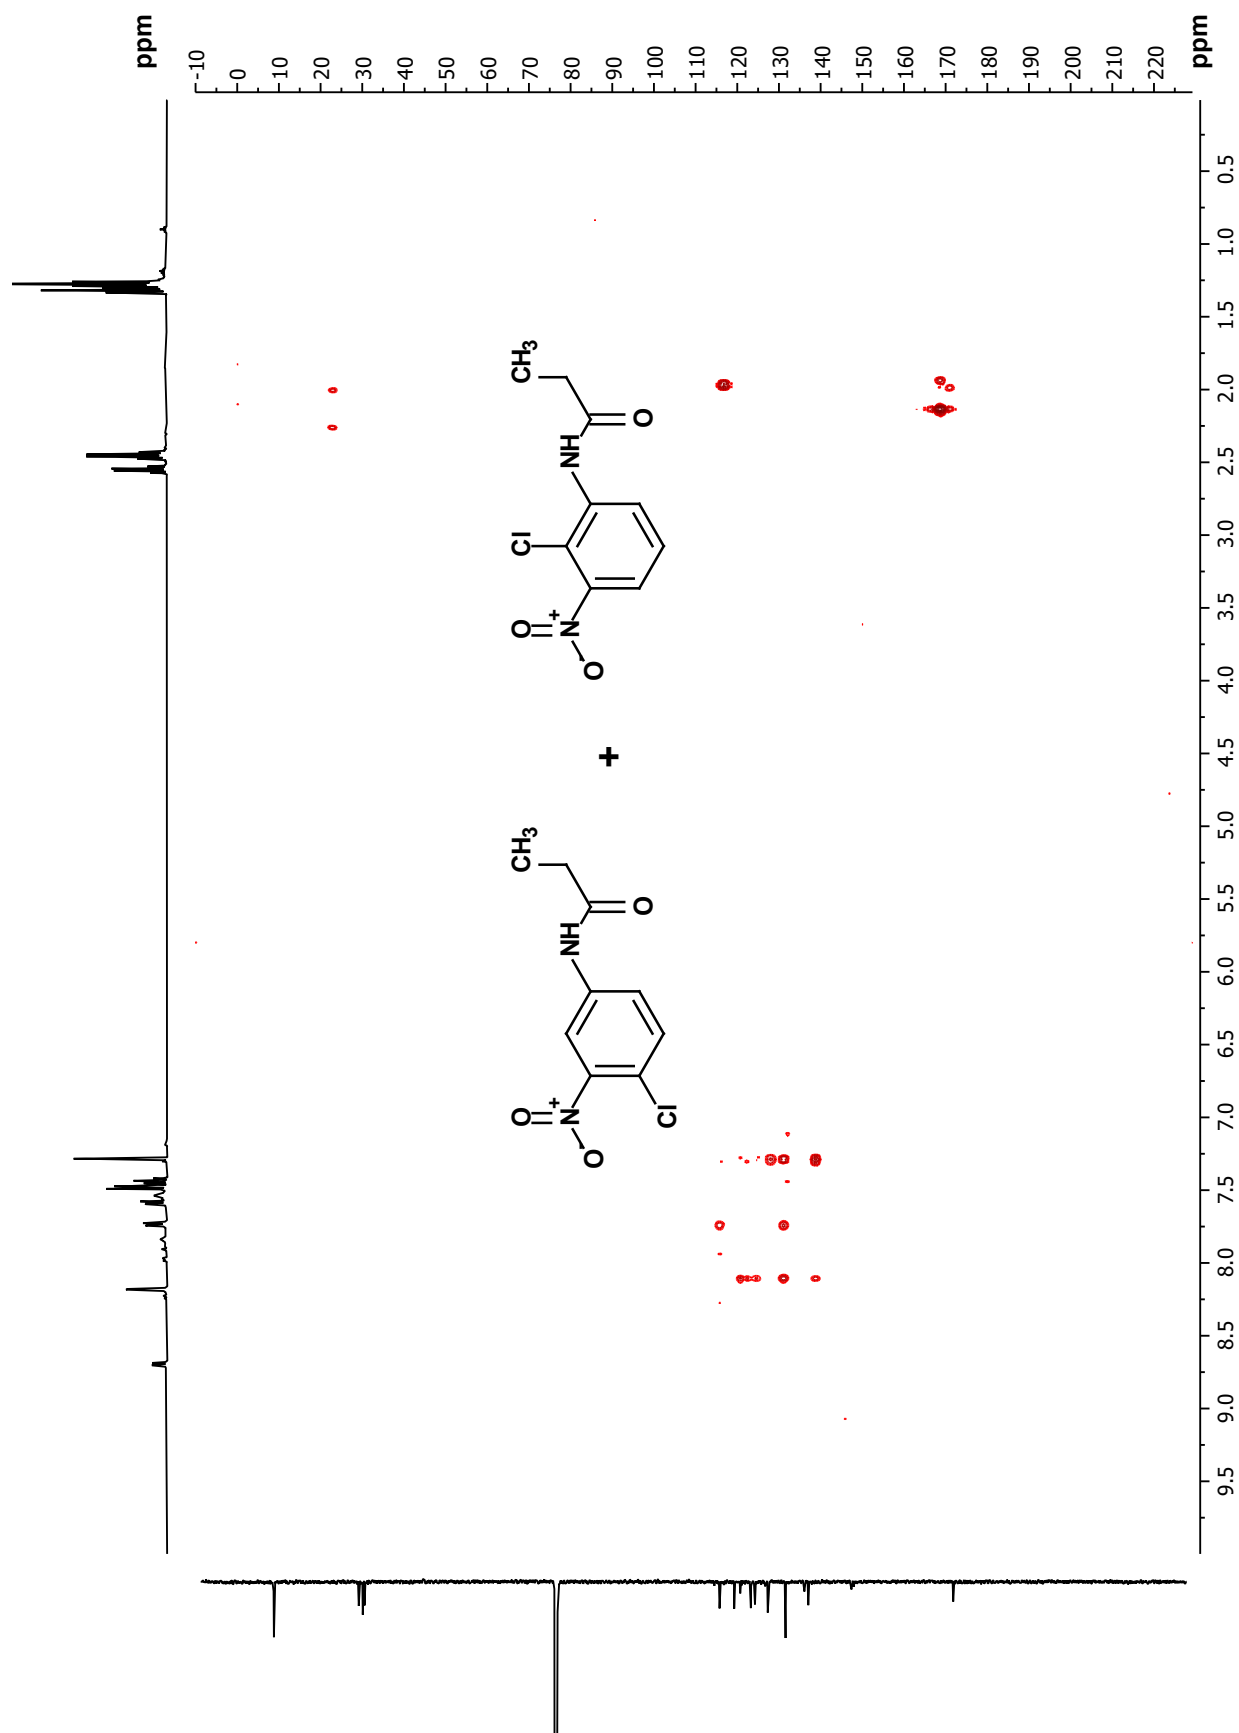

$^1\text{H}$  and  $^{13}\text{C}$  NMR *N*-(2-chloro-5-nitrophenyl)propionamide (**30**)

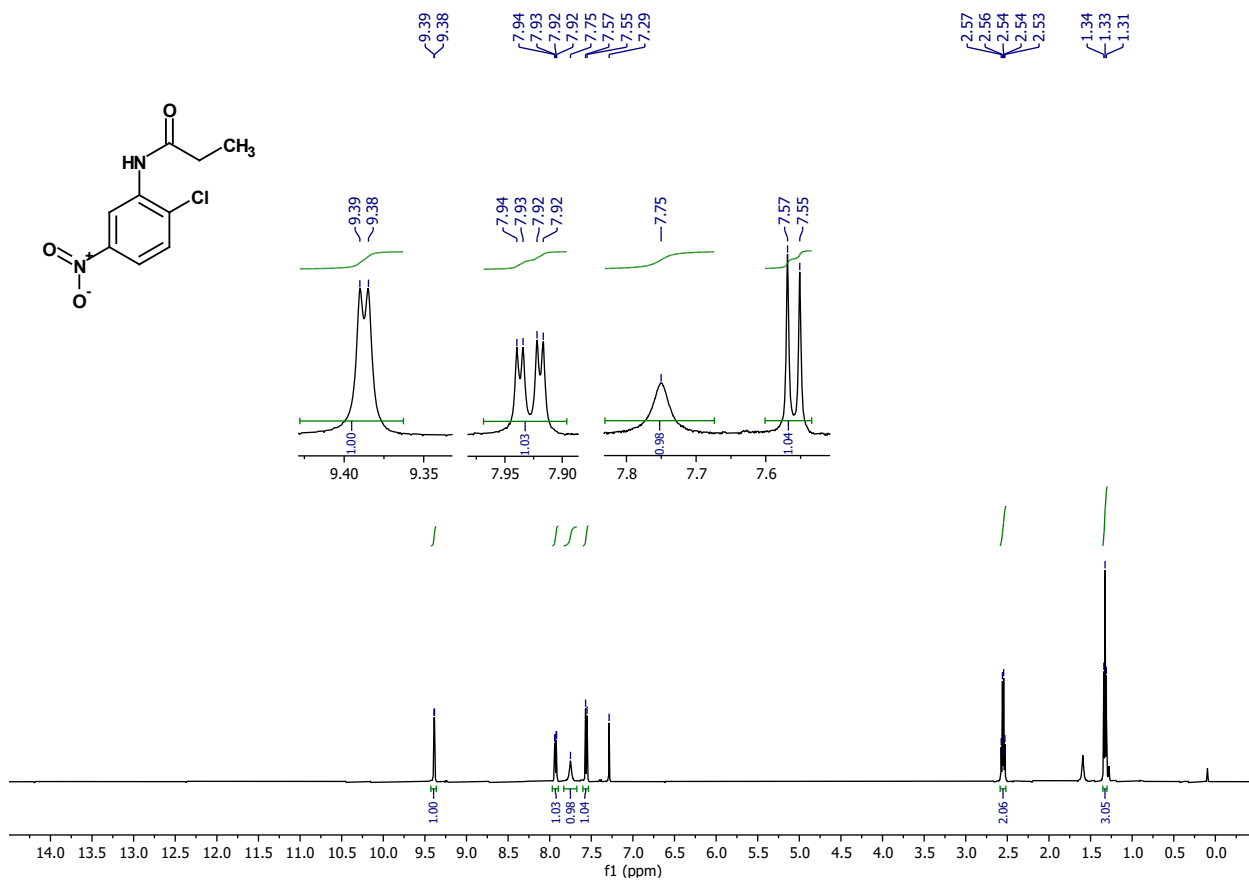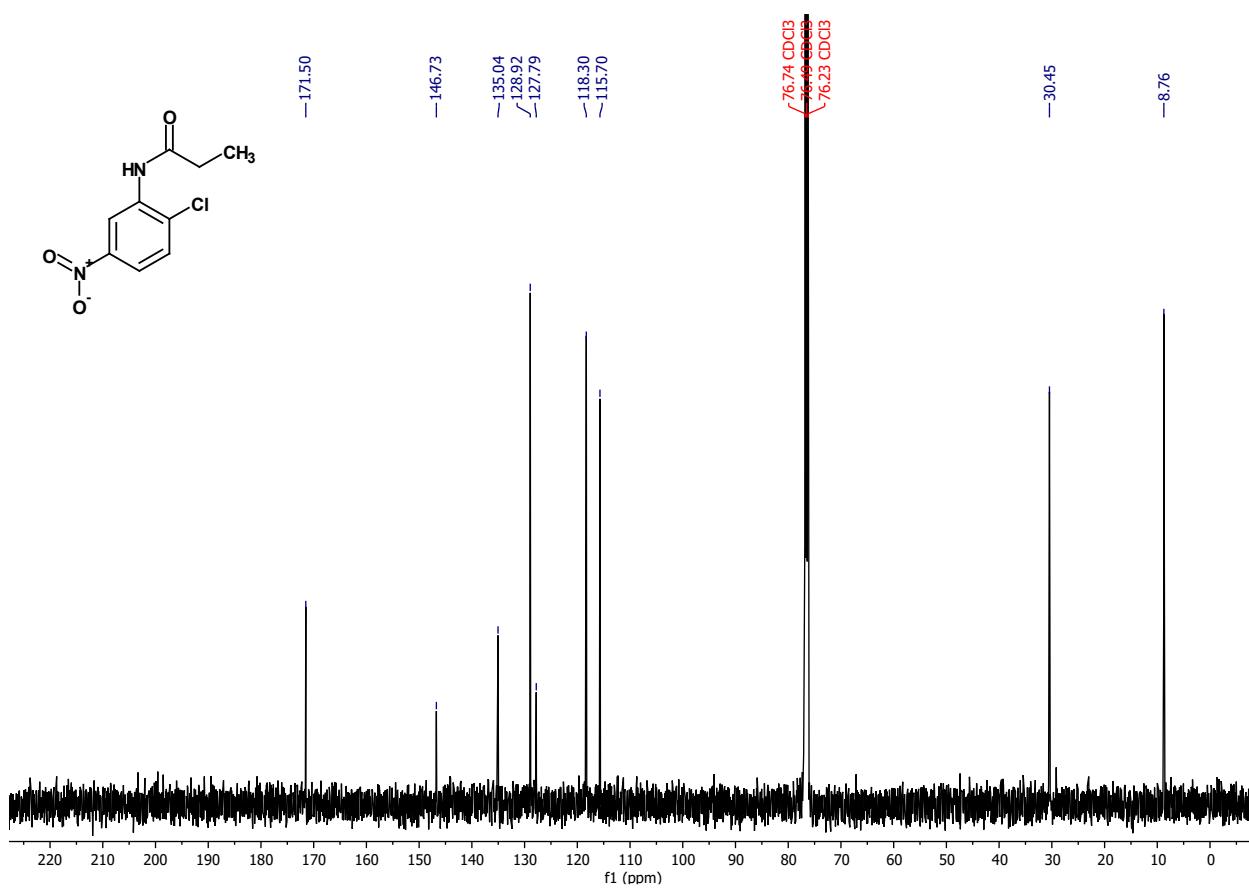

**COSY** NMR *N*-(2-chloro-5-nitrophenyl)propionamide (**3o**)

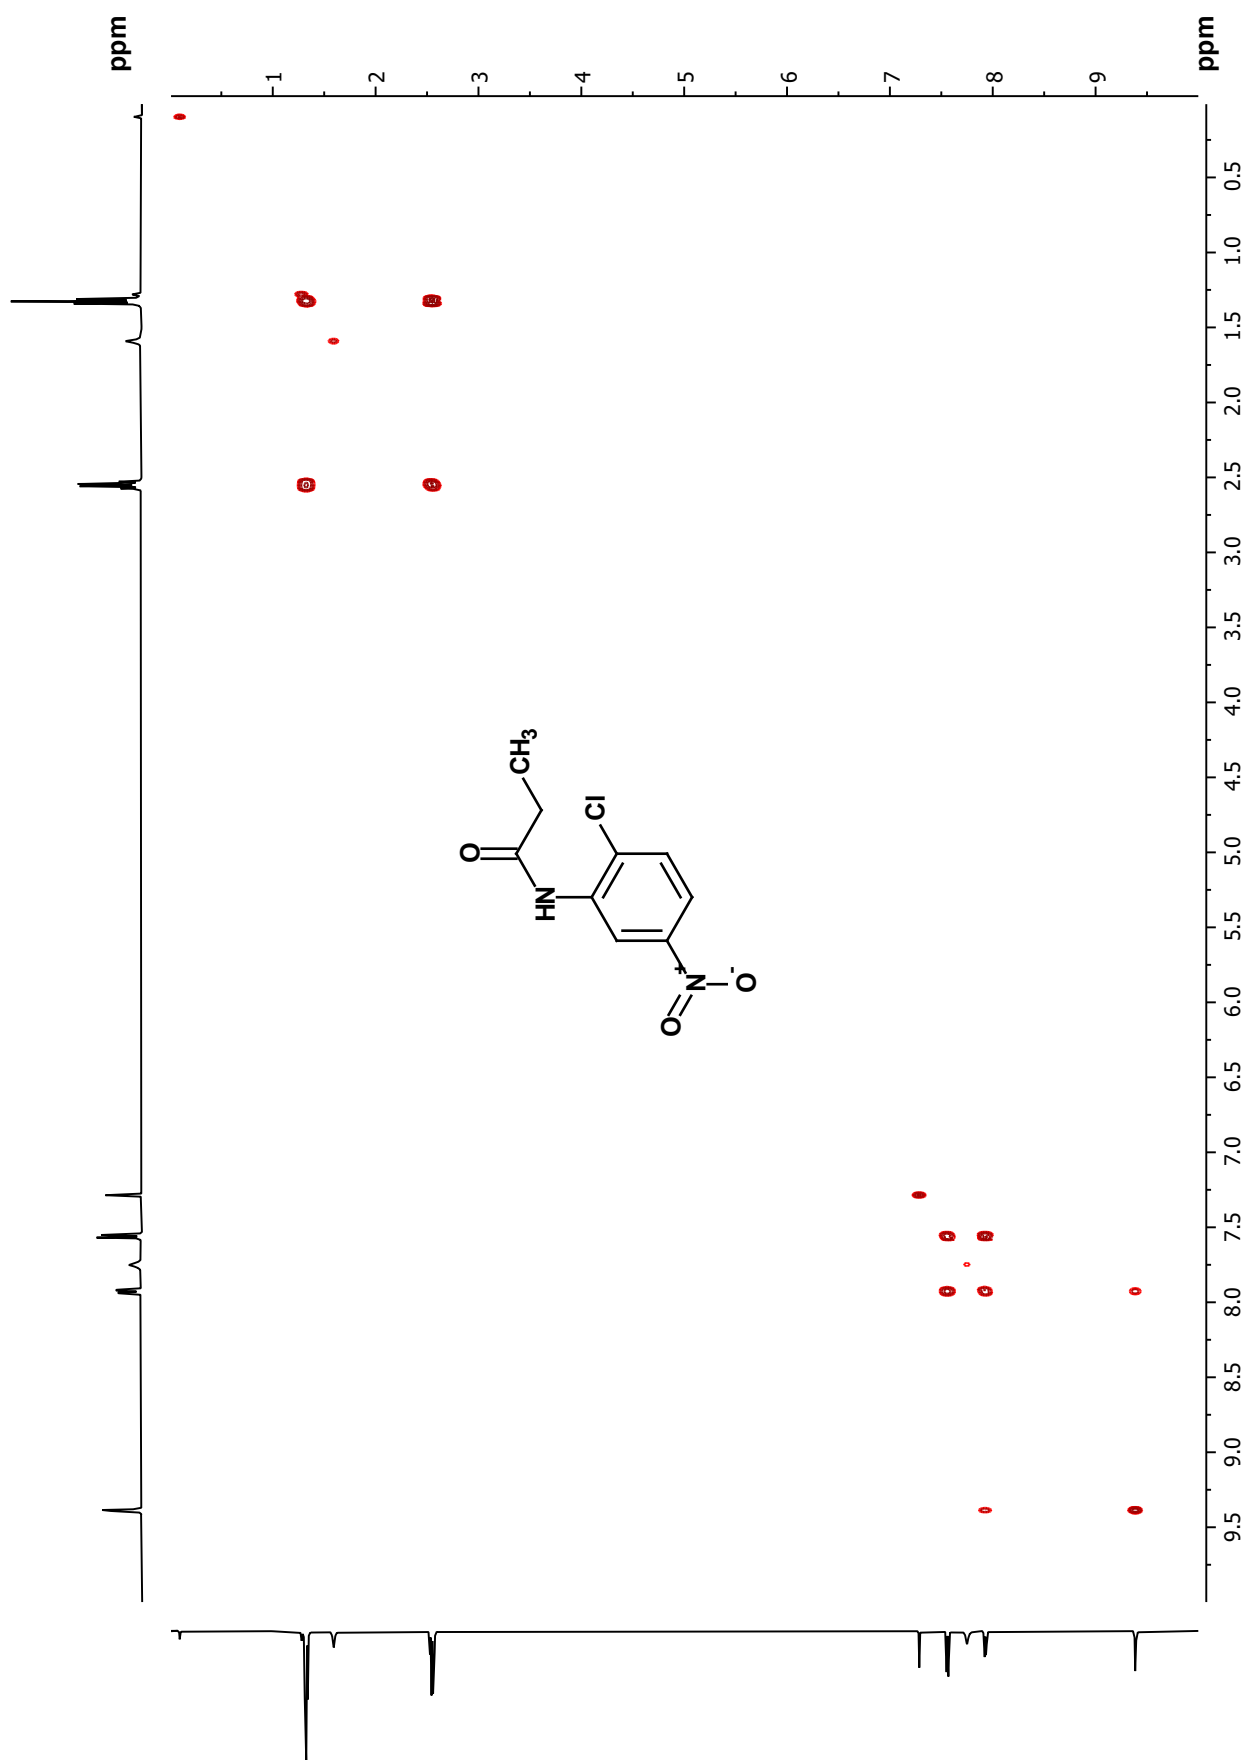

**HSQC** NMR *N*-(2-chloro-5-nitrophenyl)propionamide (**3o**)

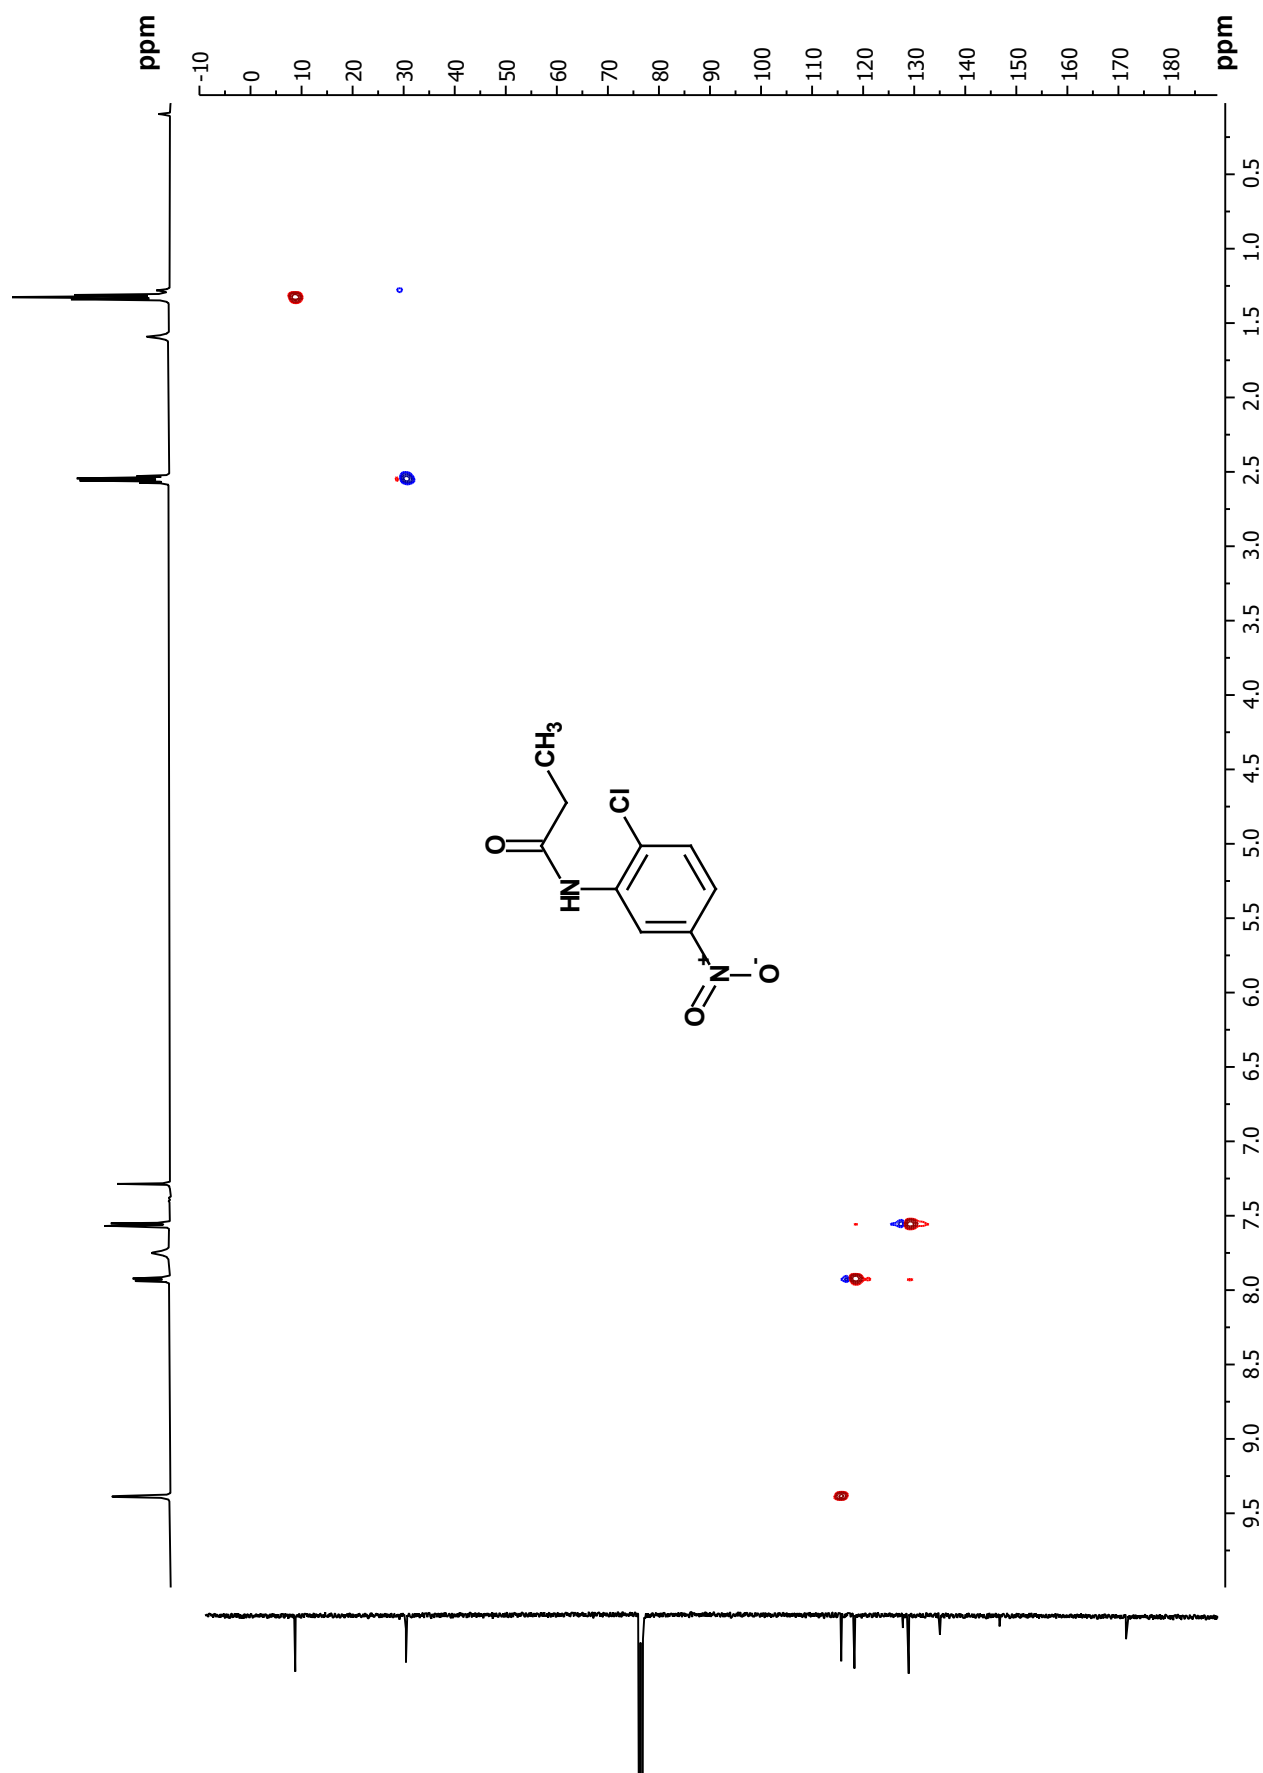

**HMBC** NMR *N*-(2-chloro-5-nitrophenyl)propionamide (**3o**)

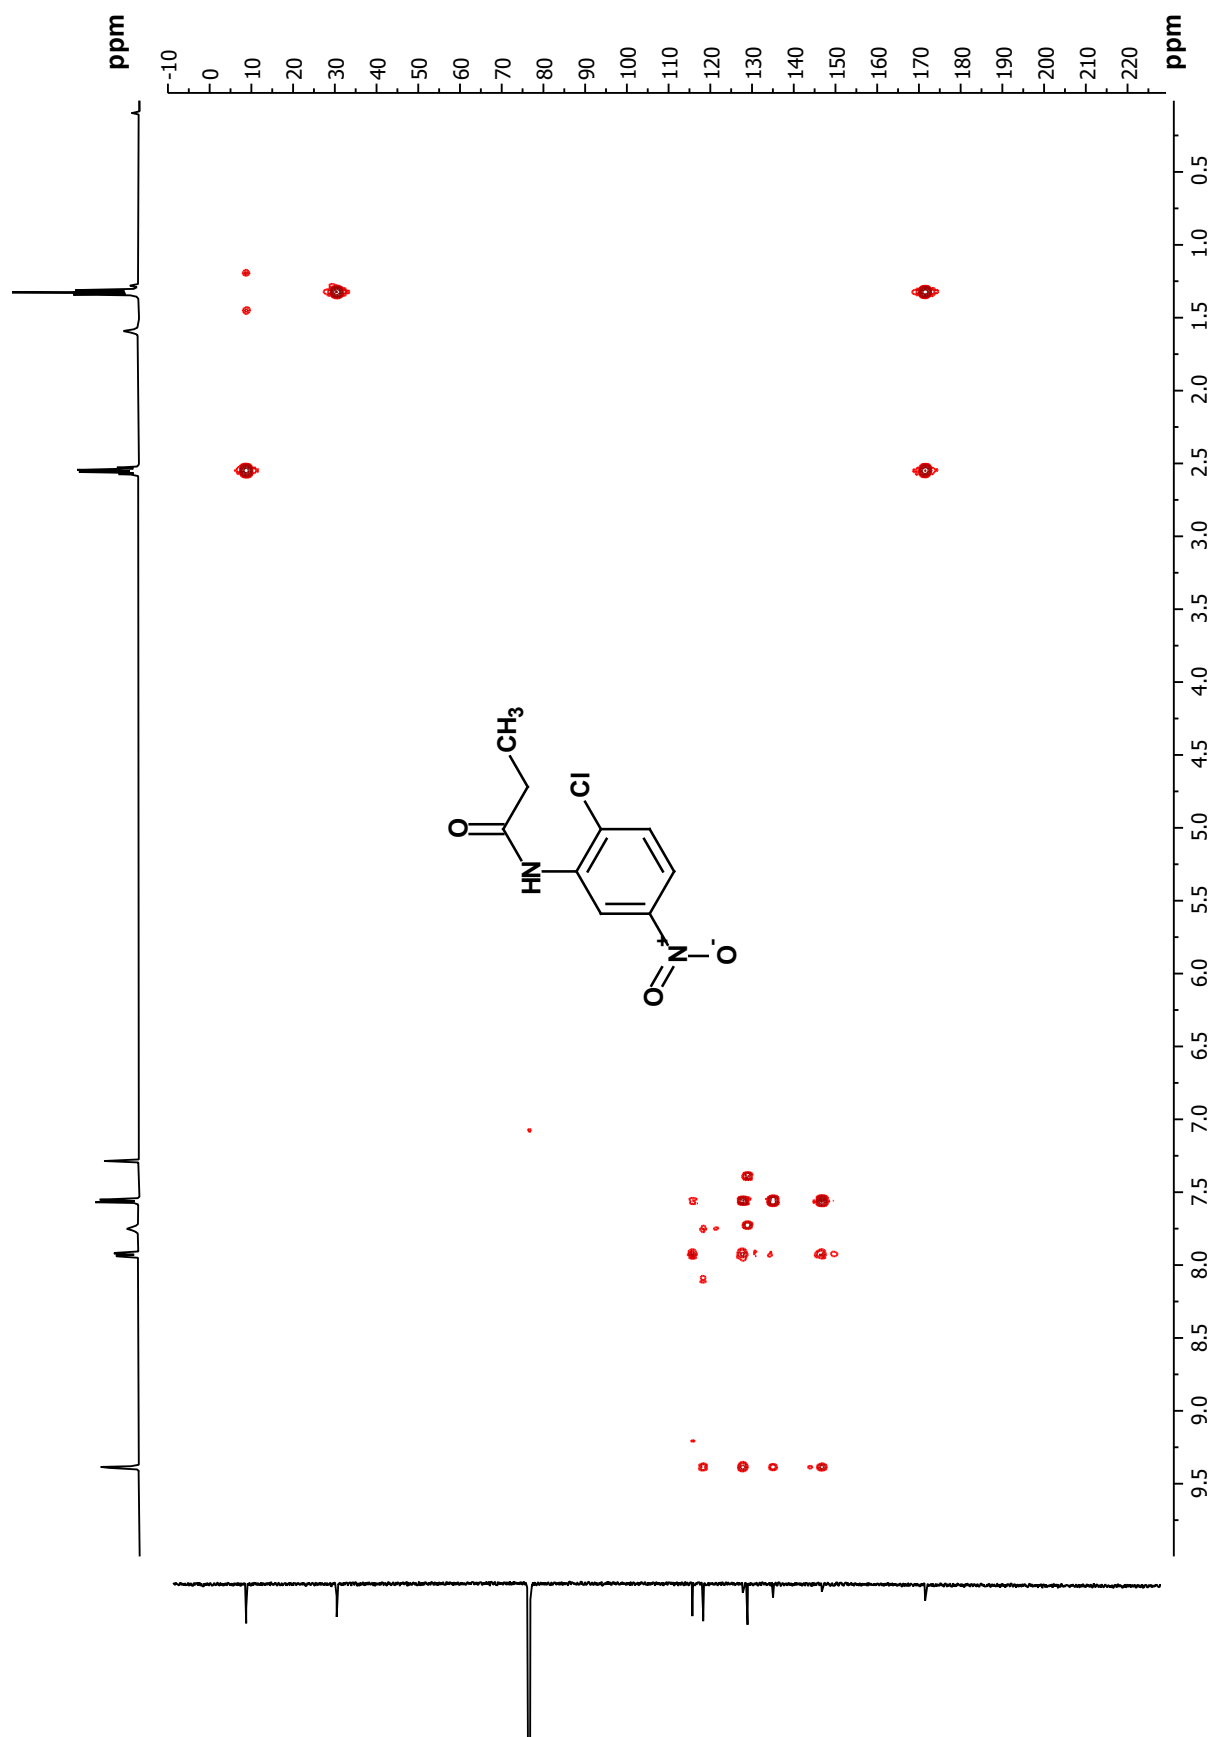

$^1\text{H}$  and  $^{13}\text{C}$  NMR *N*-(2-fluoro-5-nitrophenyl)propionamide (**3p**)

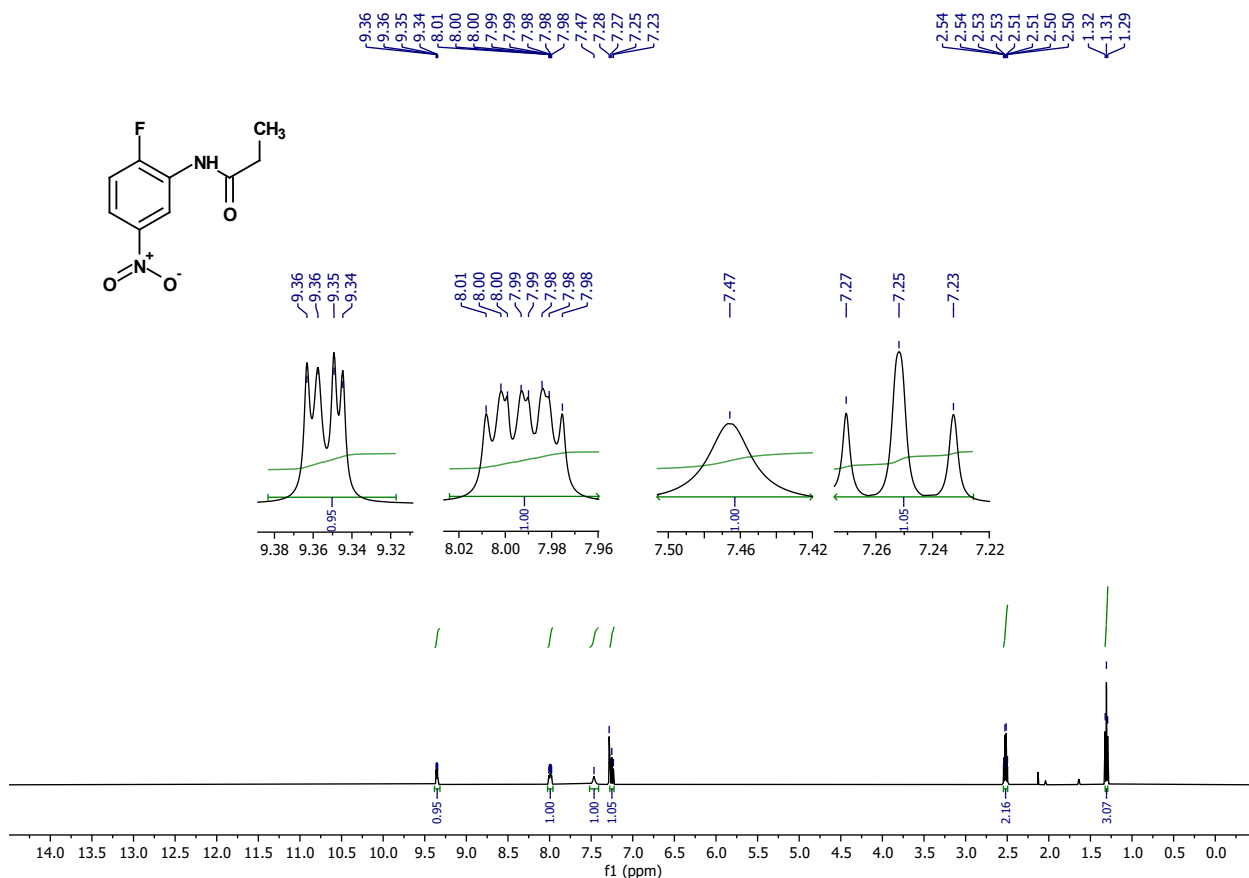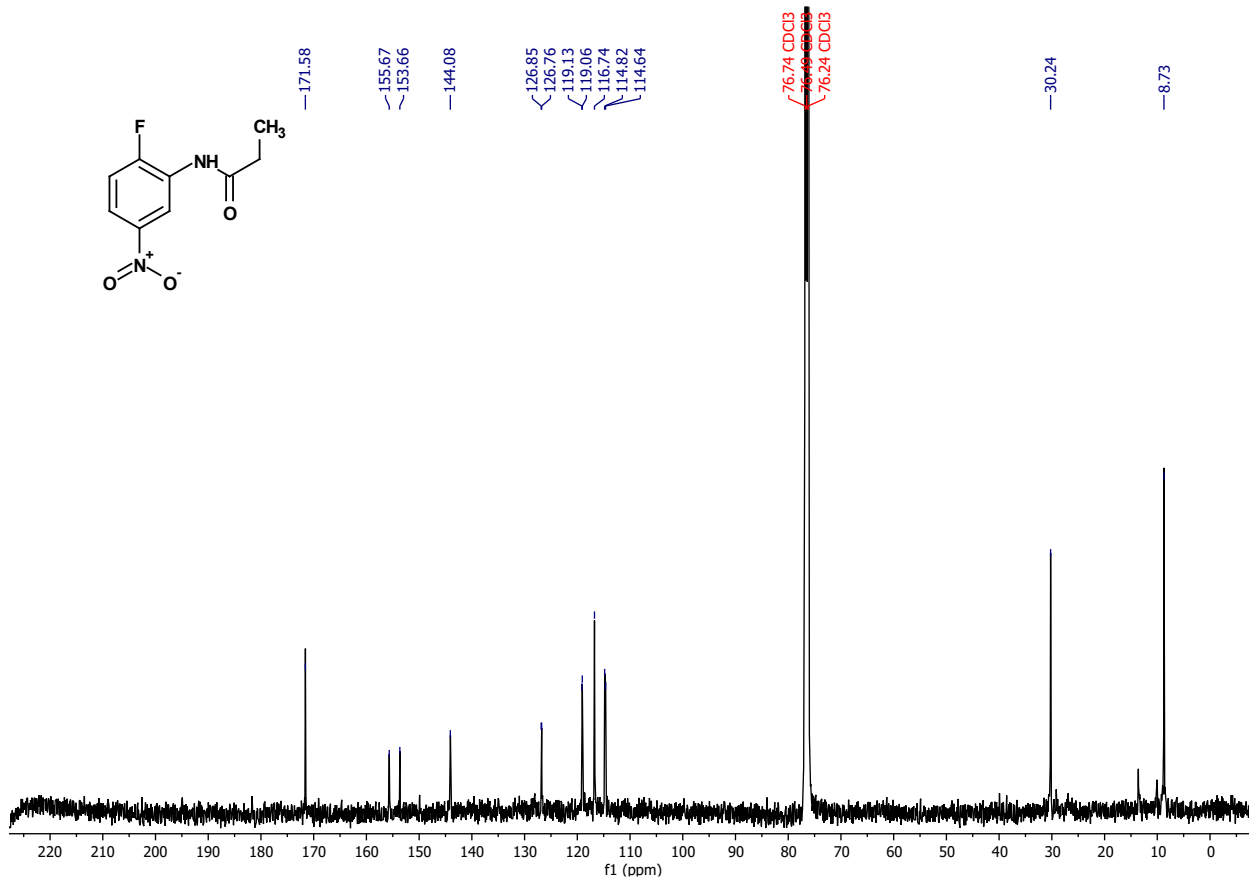

$^{19}\text{F}$  NMR *N*-(2-fluoro-5-nitrophenyl)propionamide (**3p**)

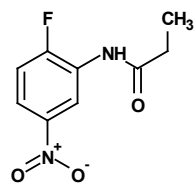

-121.72

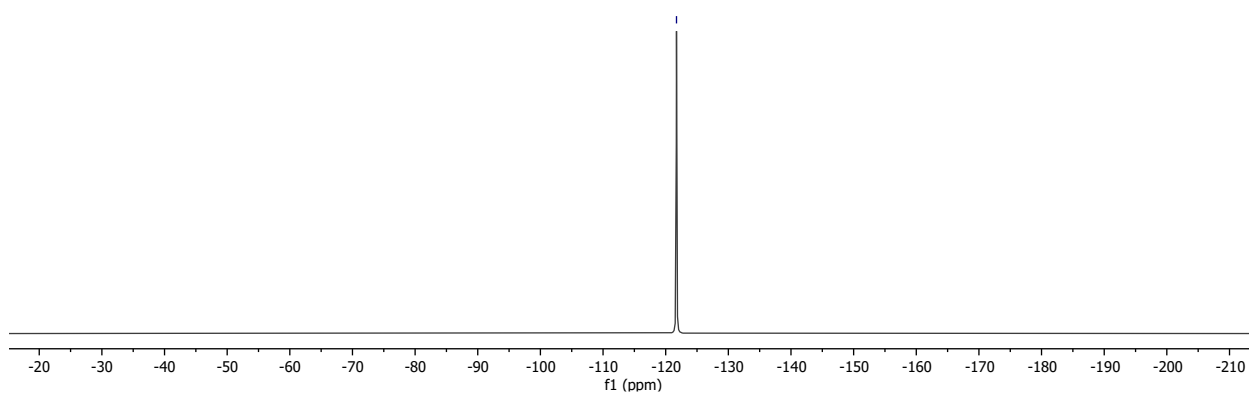



**COSY** NMR *N*-(2-fluoro-5-nitrophenyl)propionamide (**3p**)

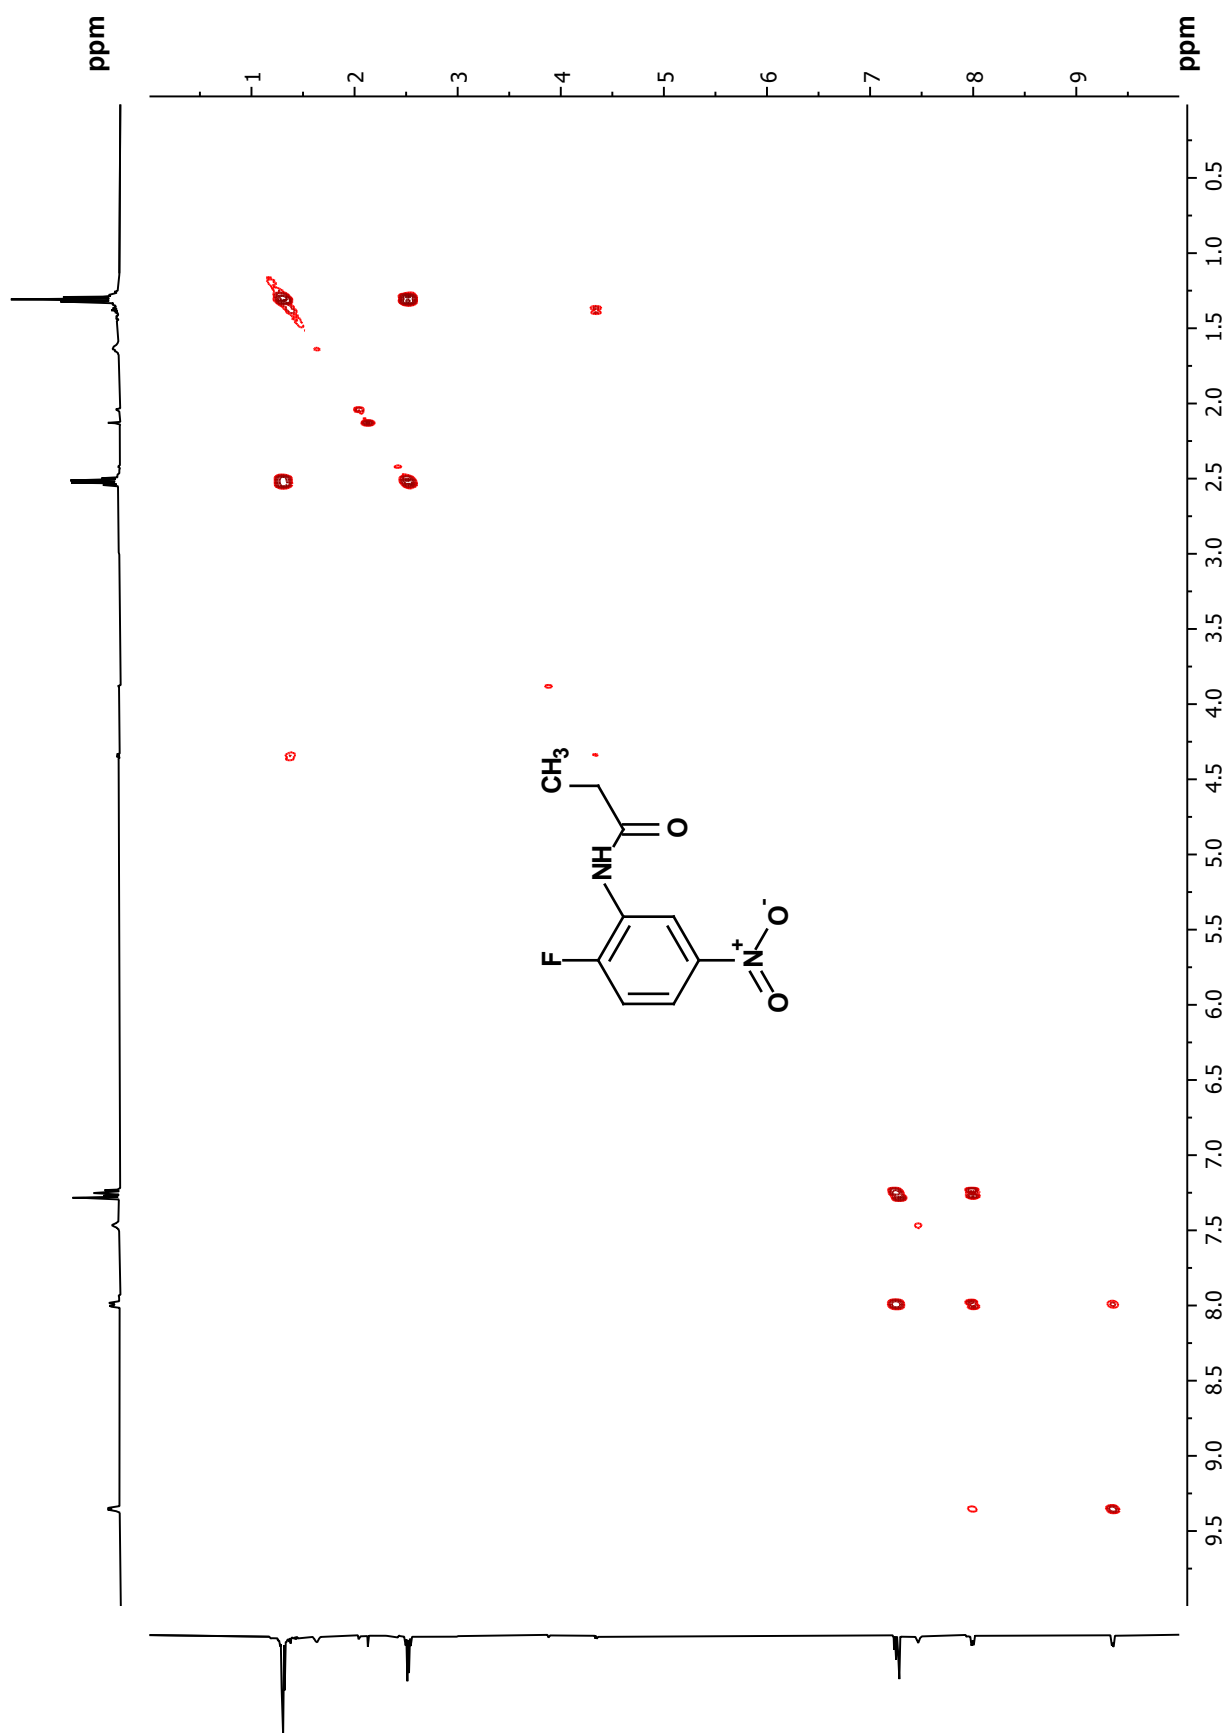

**HSQC** NMR *N*-(2-fluoro-5-nitrophenyl)propionamide (**3p**)

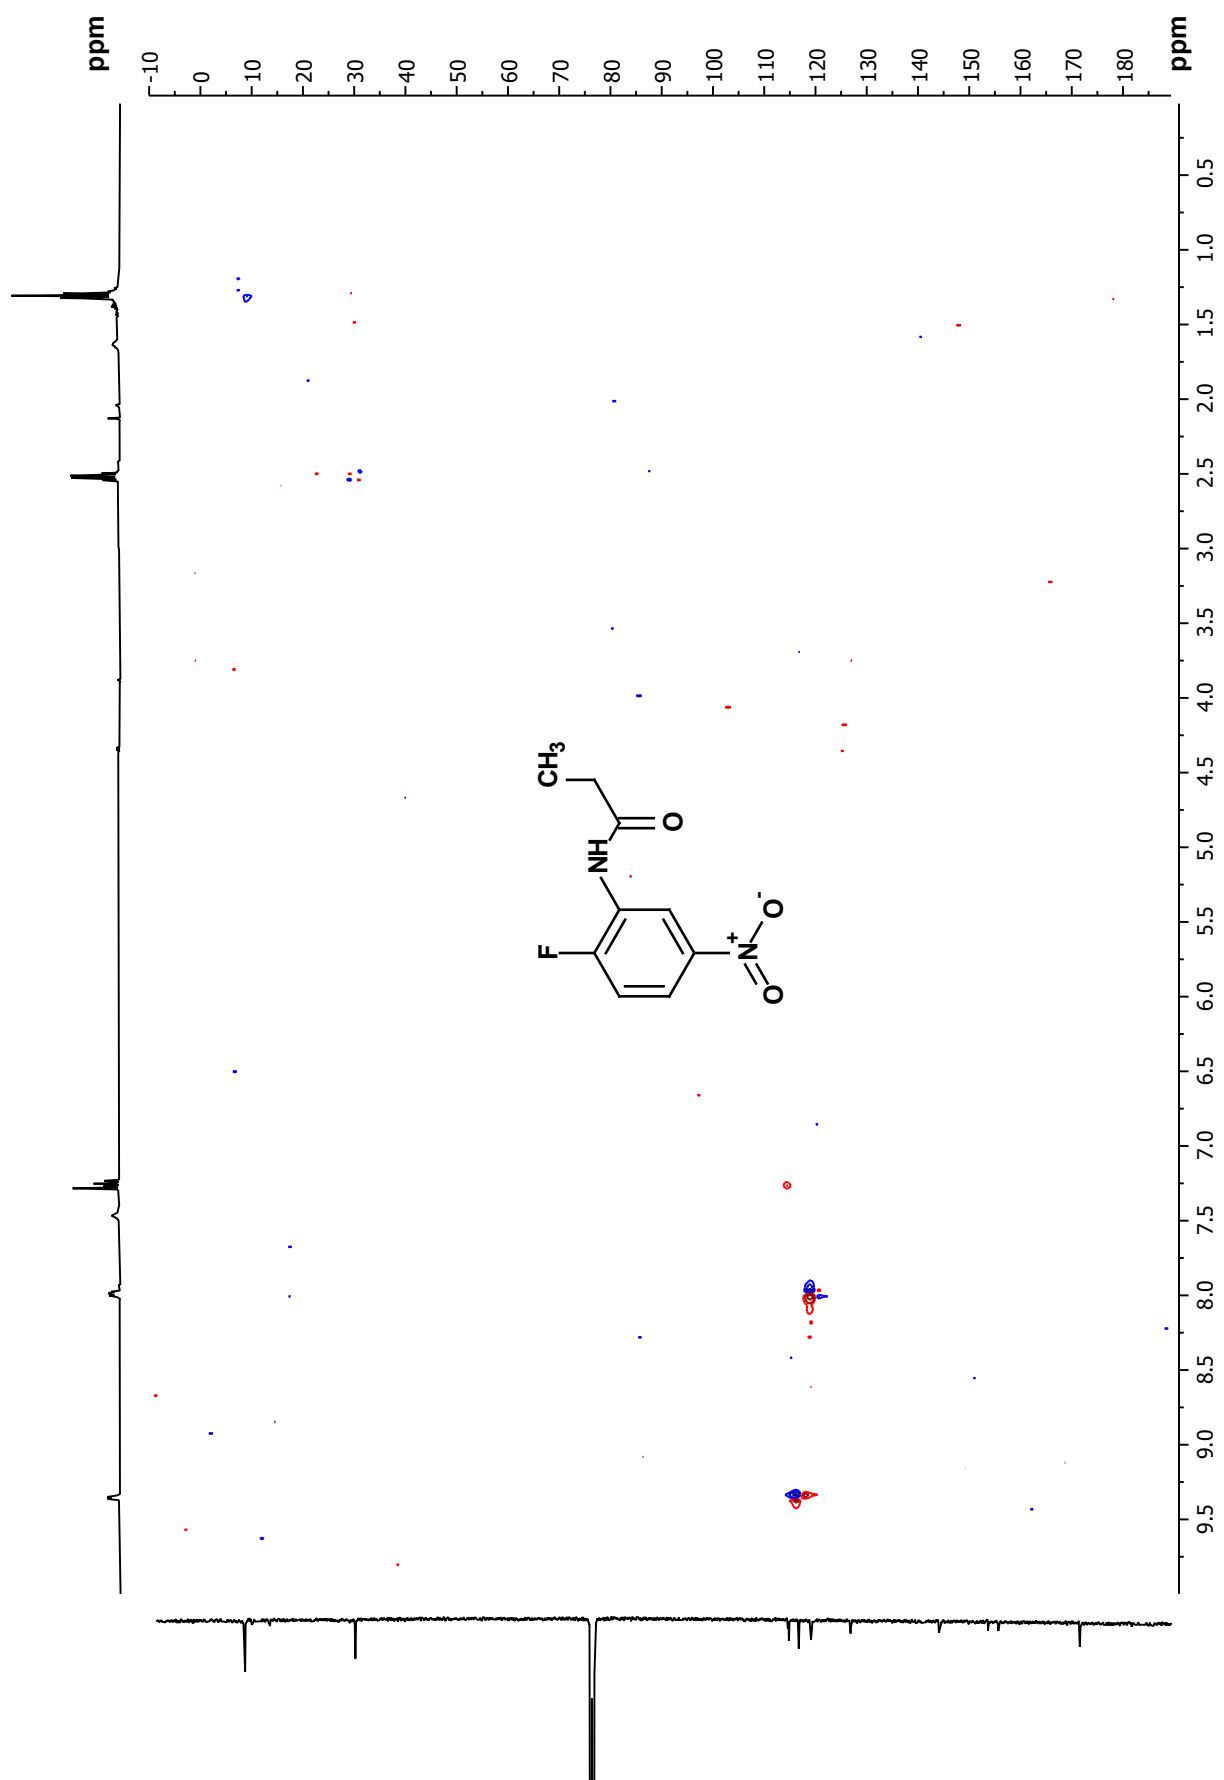

**HMBC** NMR *N*-(2-fluoro-5-nitrophenyl)propionamide (**3p**)

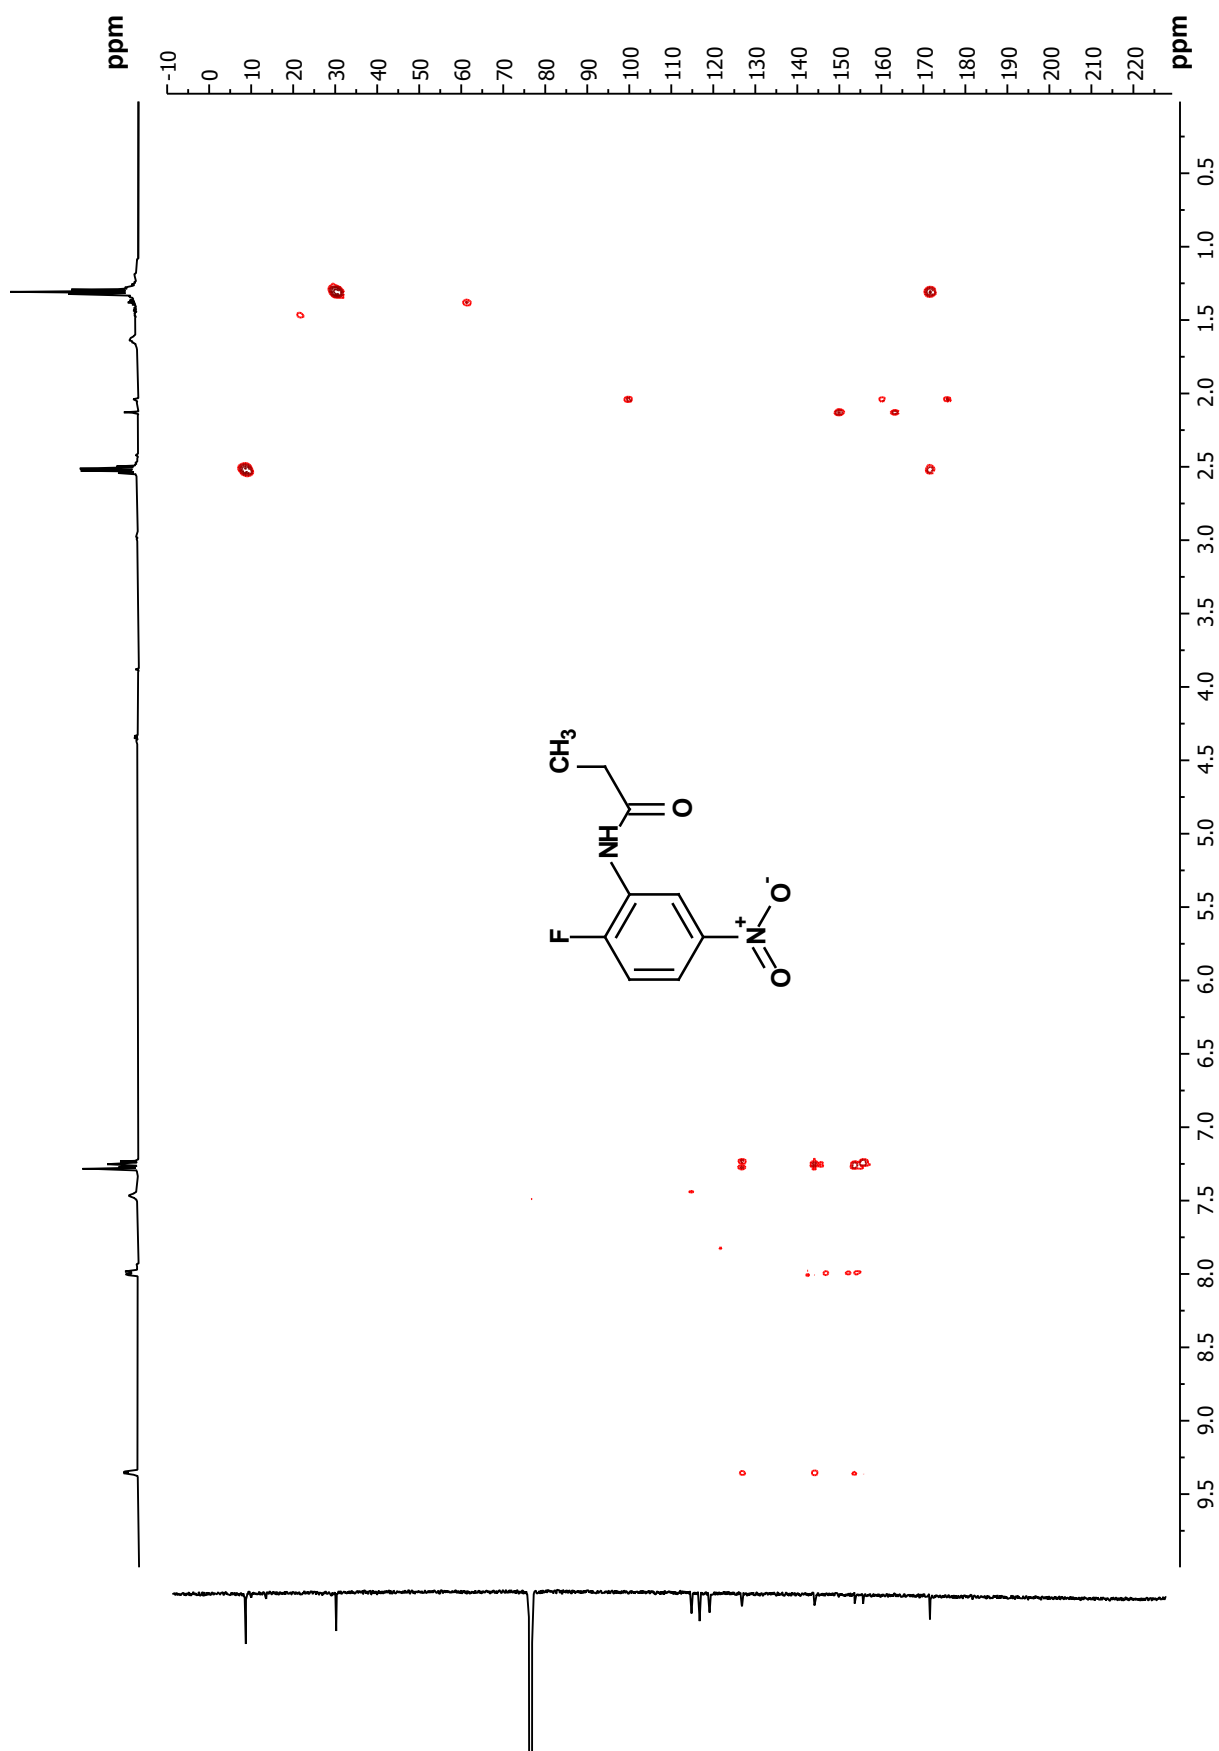

$^1\text{H}$  and  $^{13}\text{C}$  NMR *N*-(2-bromo-5-nitrophenyl) propionamide (**3q**)

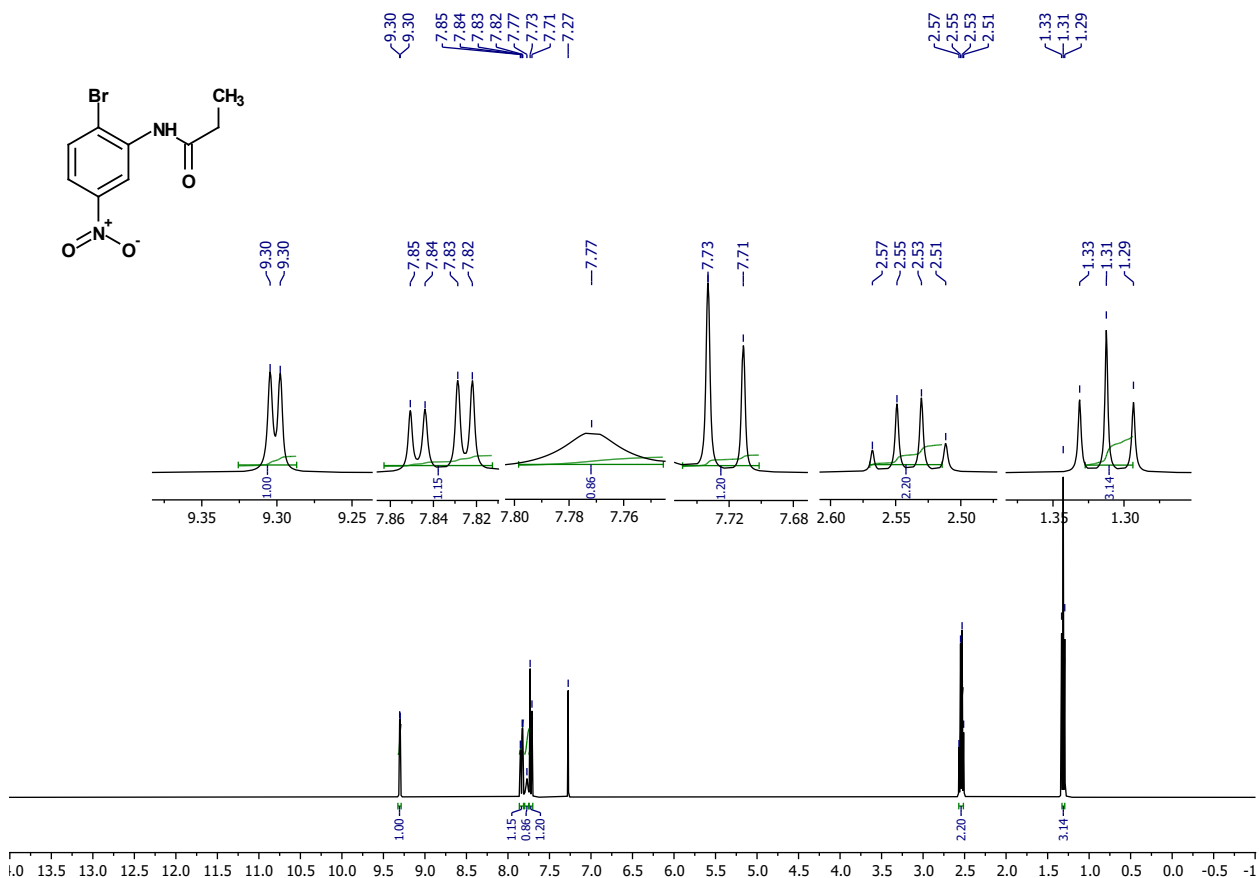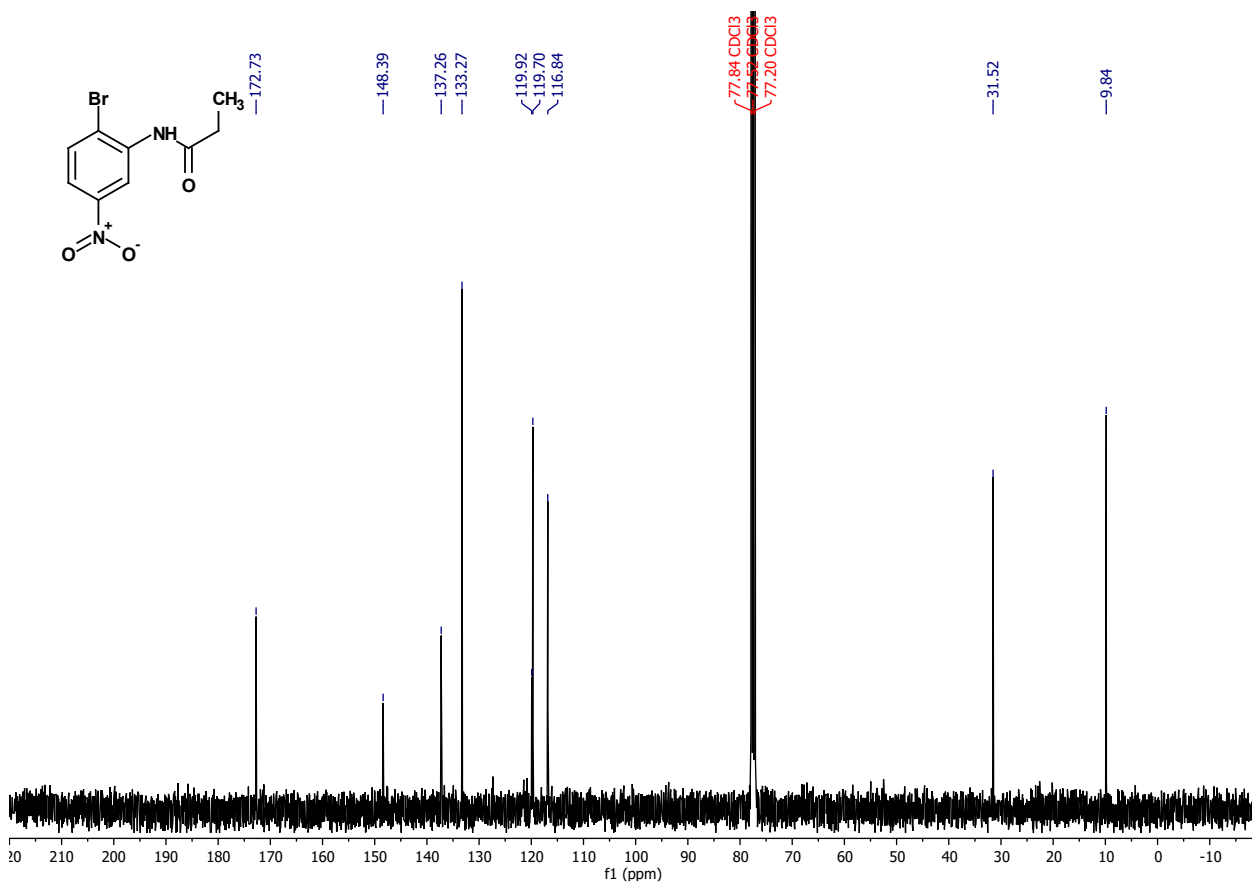

$^1\text{H}$  and  $^{13}\text{C}$  NMR ethyl 2-propionamidobenzoate (**3r-a**)

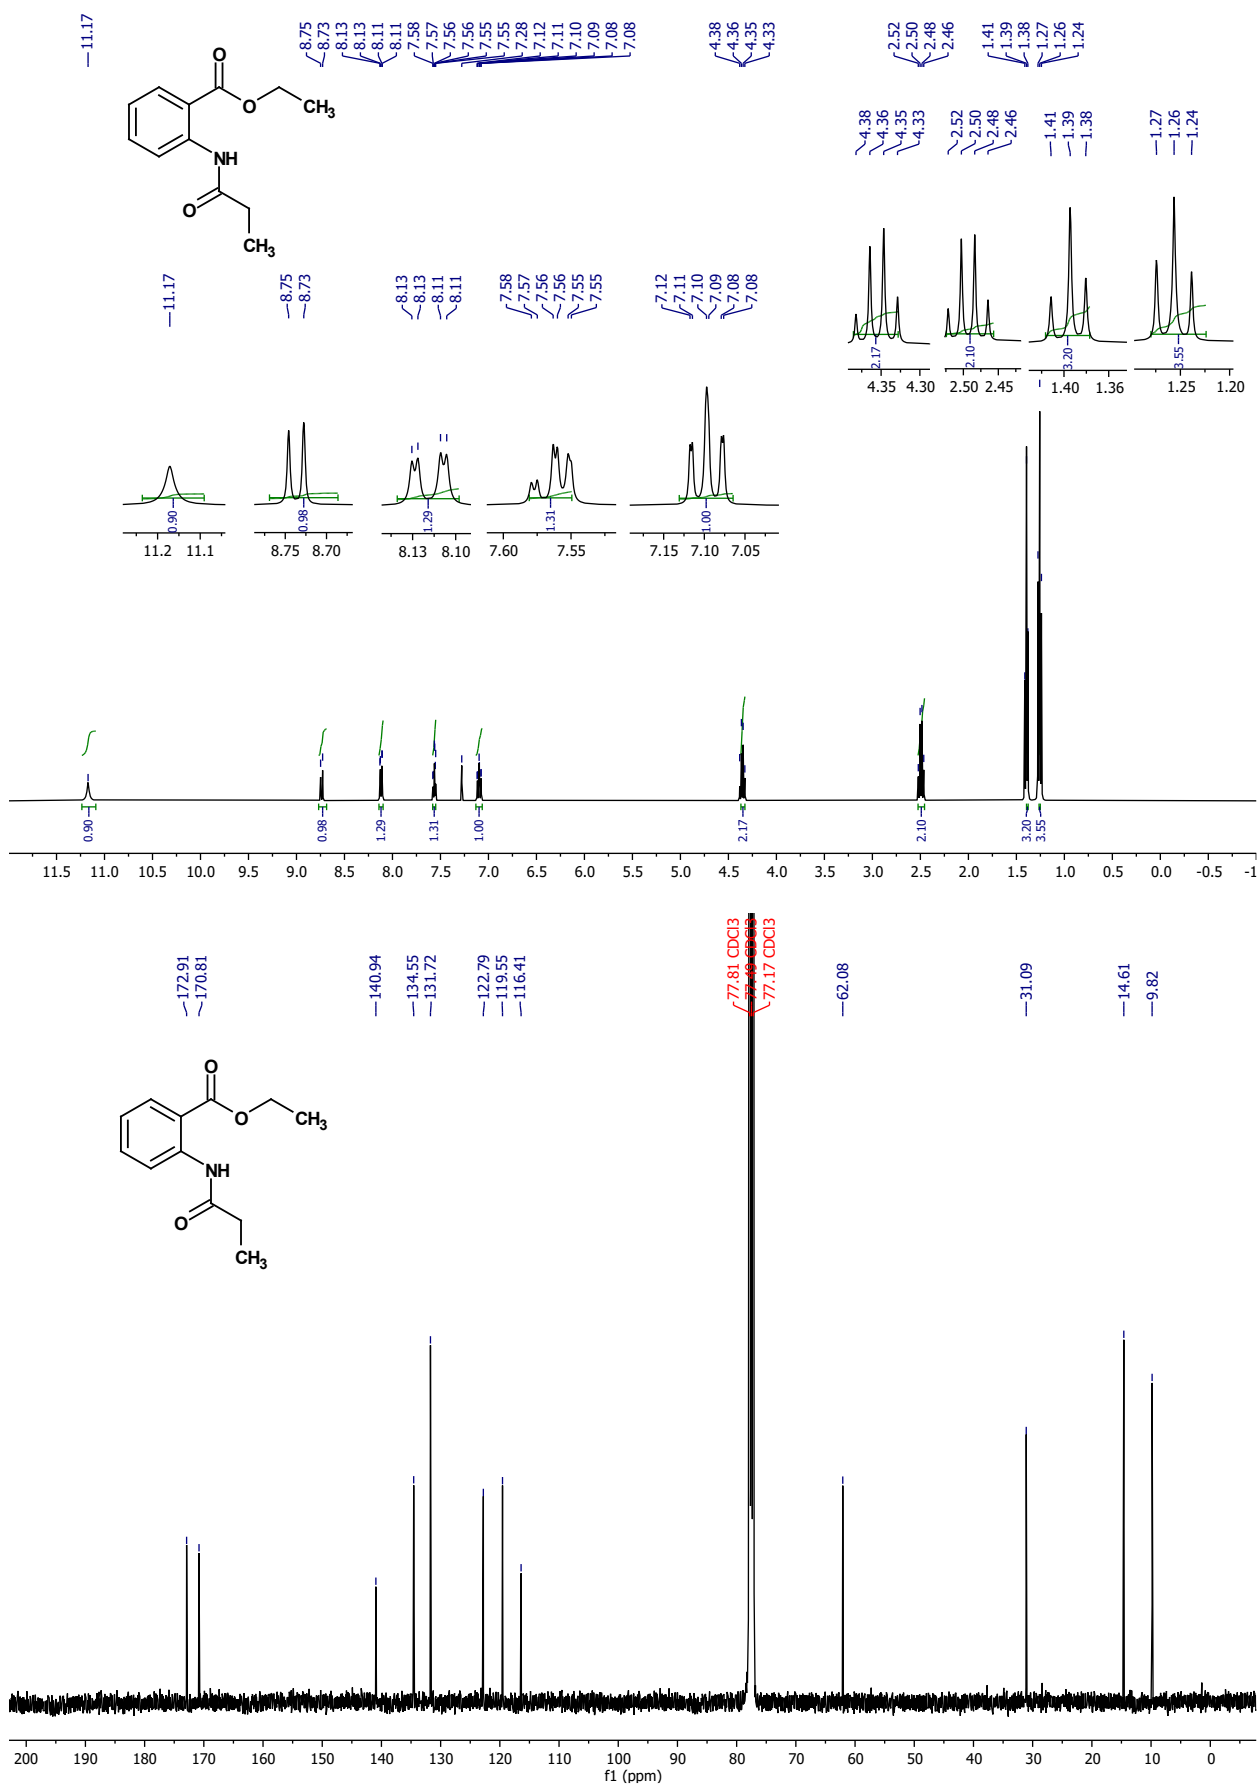

$^1\text{H}$  and  $^{13}\text{C}$  NMR Ethyl 3-propionamidobenzoate (**3r-b**) + Ethyl 4-propionamidobenzoate (**3r-c**)

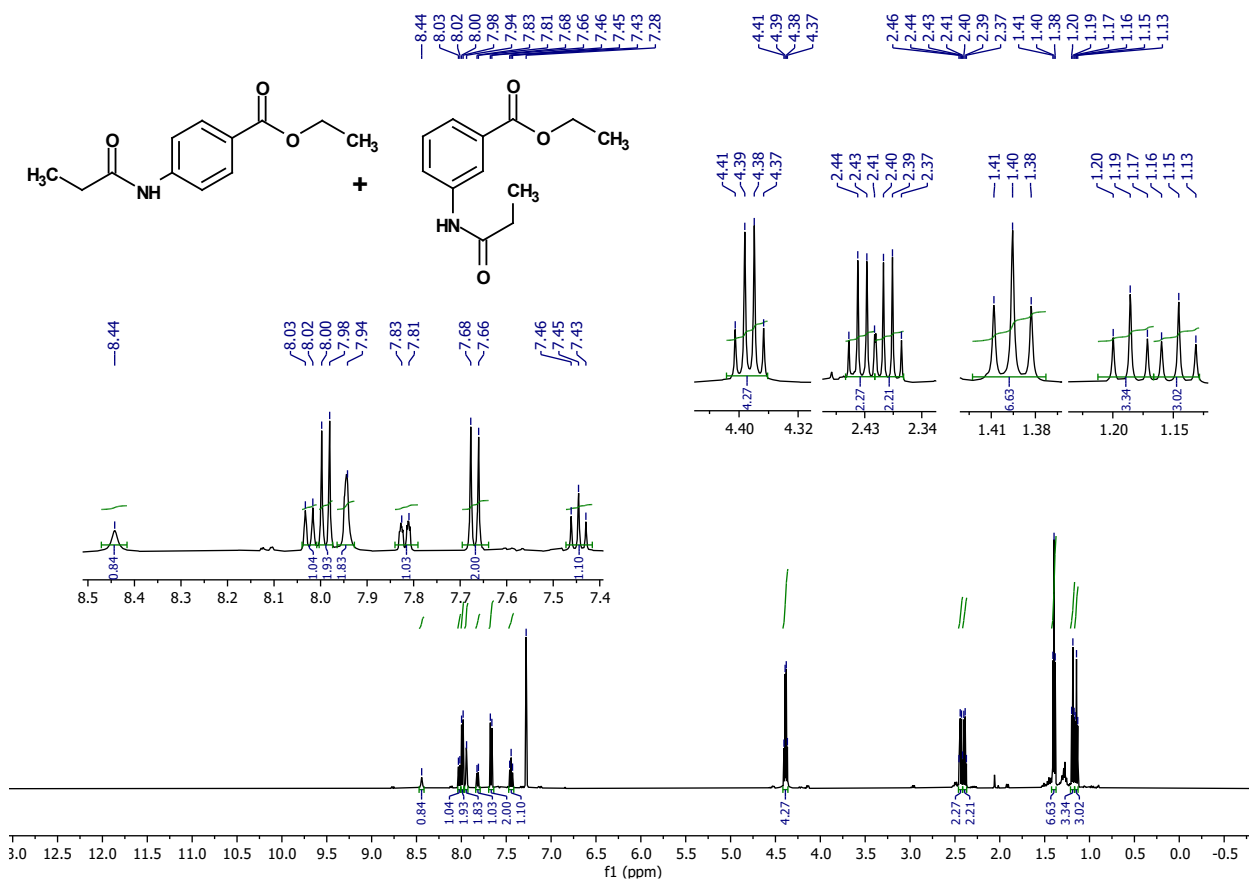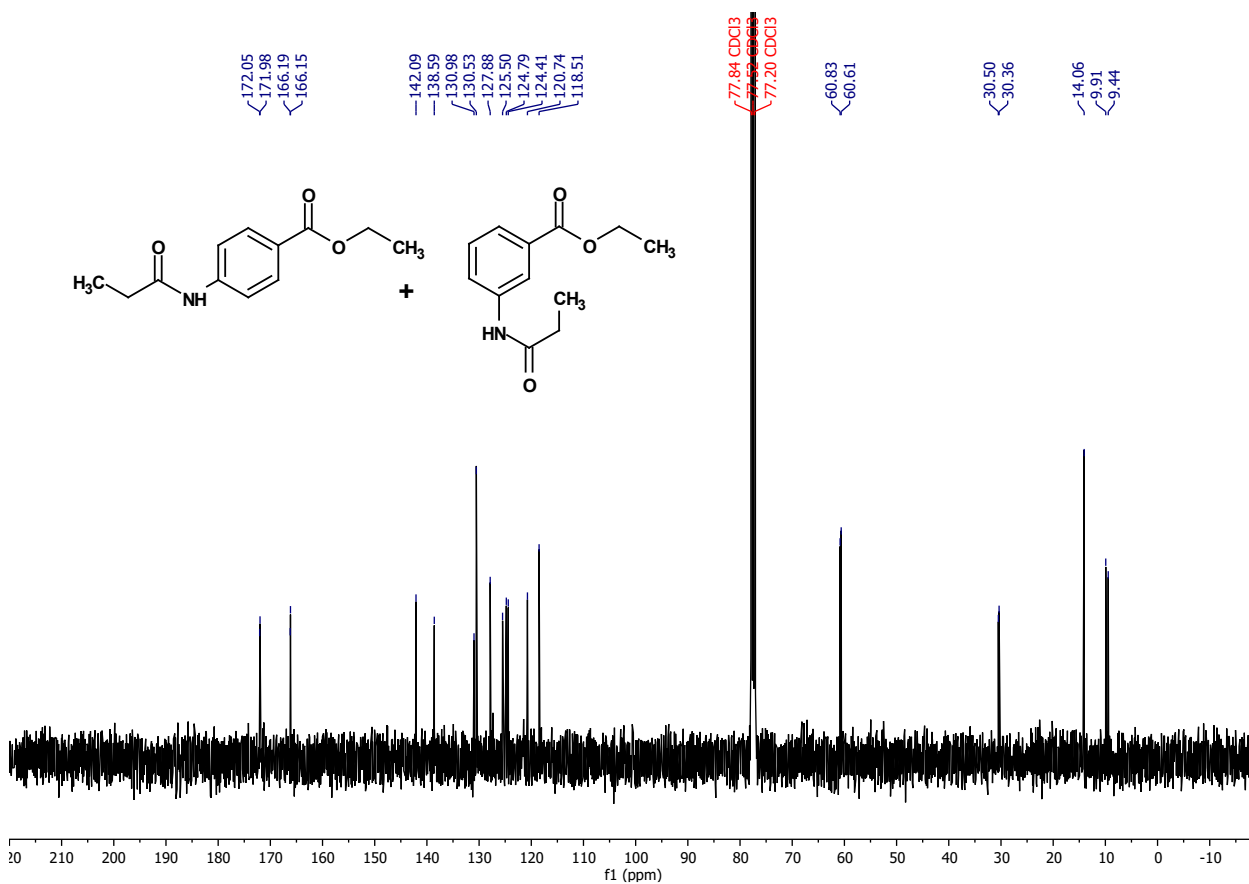

$^1\text{H}$  and  $^{13}\text{C}$  NMR Dimethyl 4-propionamidoisophthalate (**3s-a**)

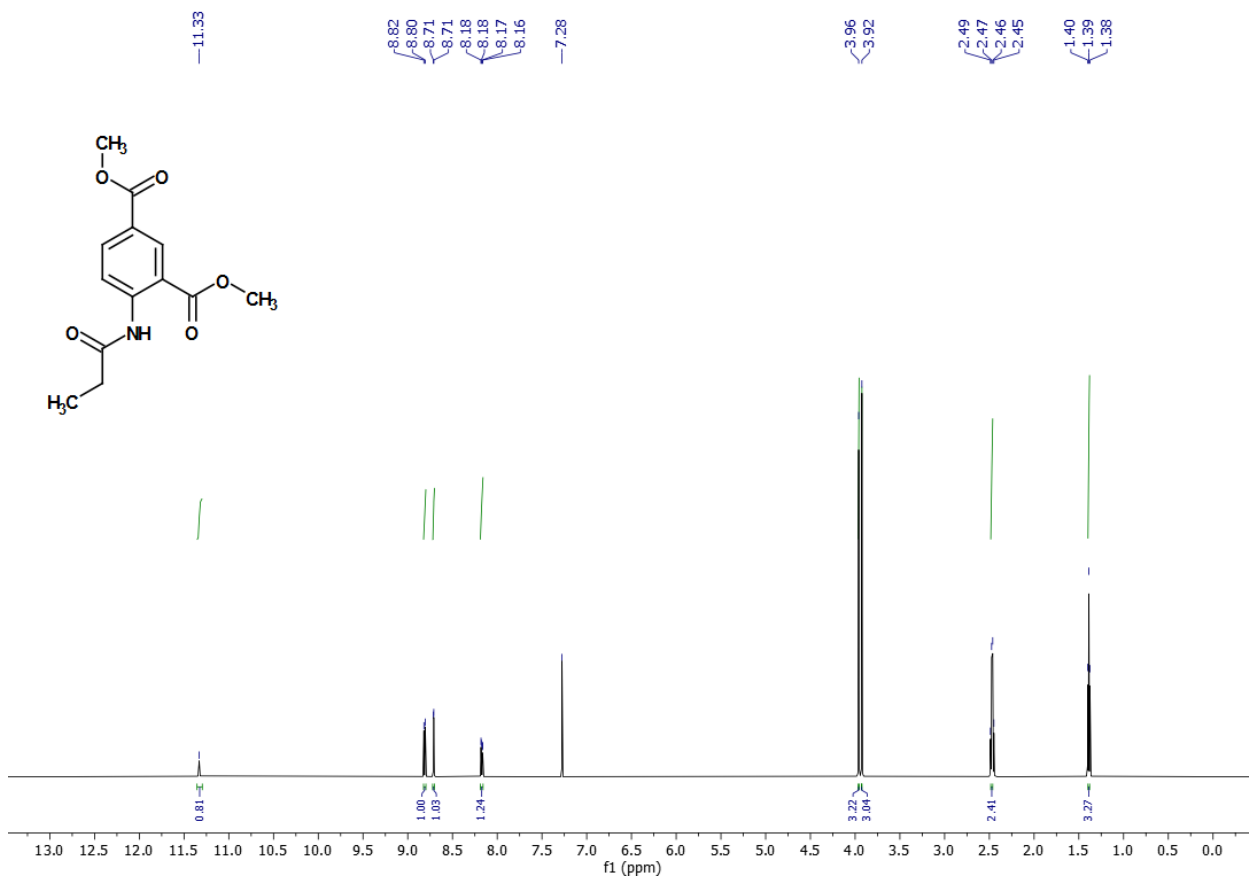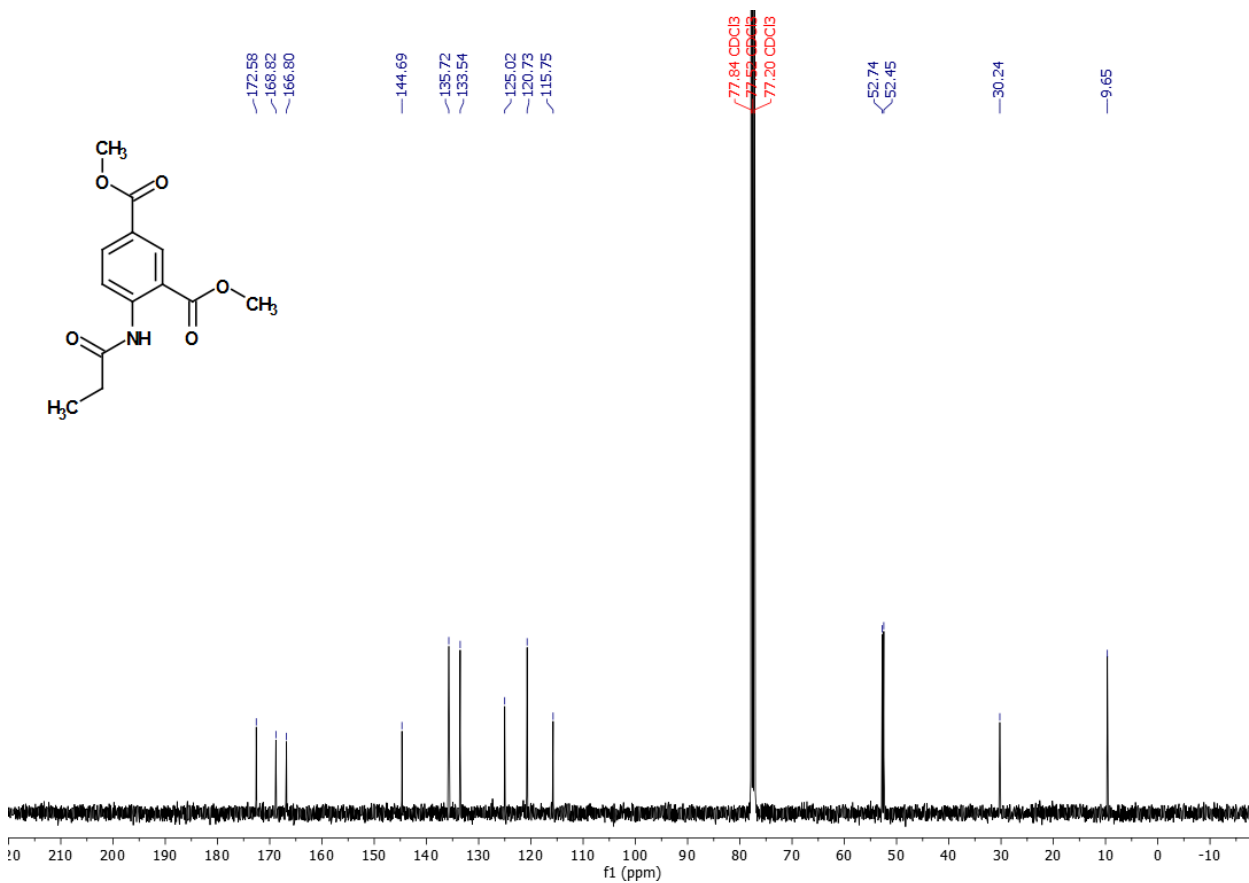

$^1\text{H}$  and  $^{13}\text{C}$  NMR Dimethyl 2-propionamidoisophthalate (**3s-b**)

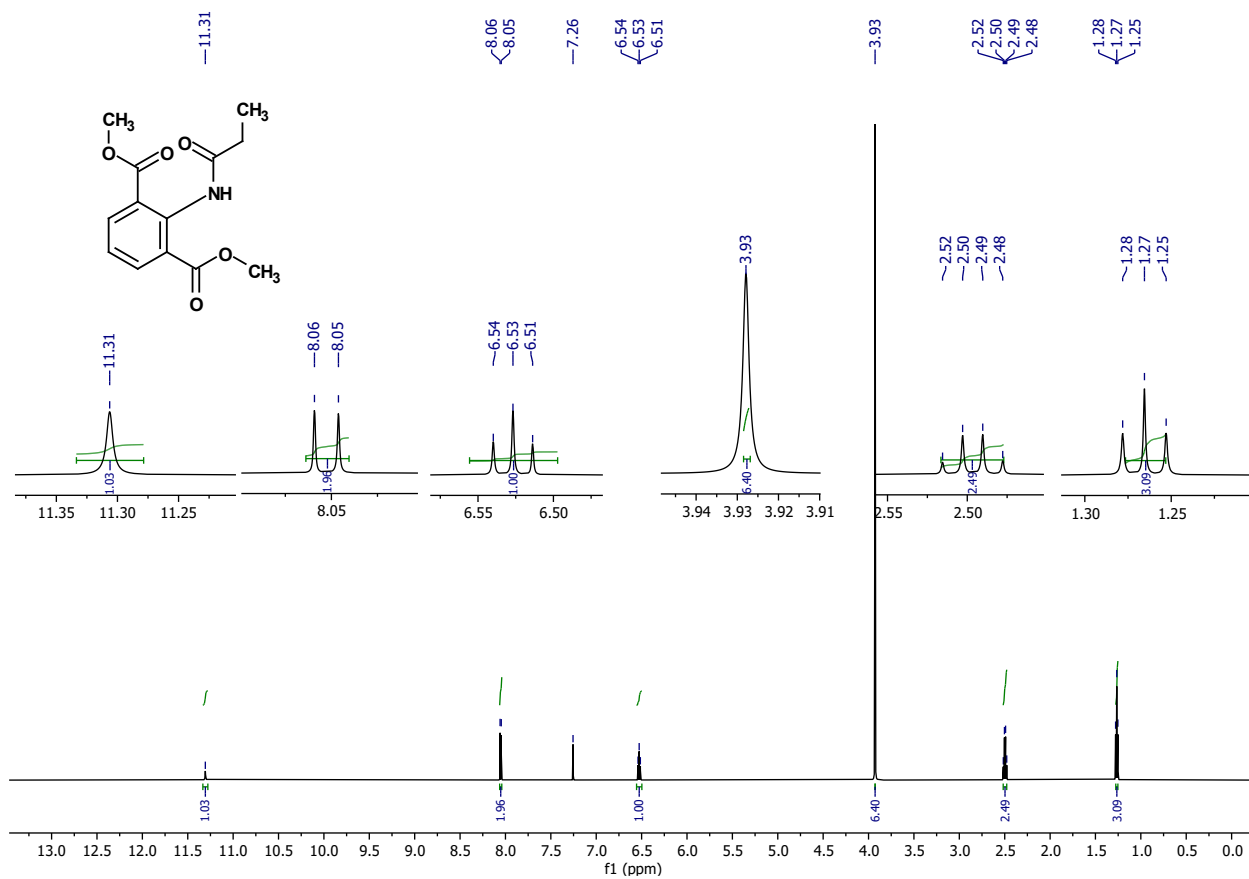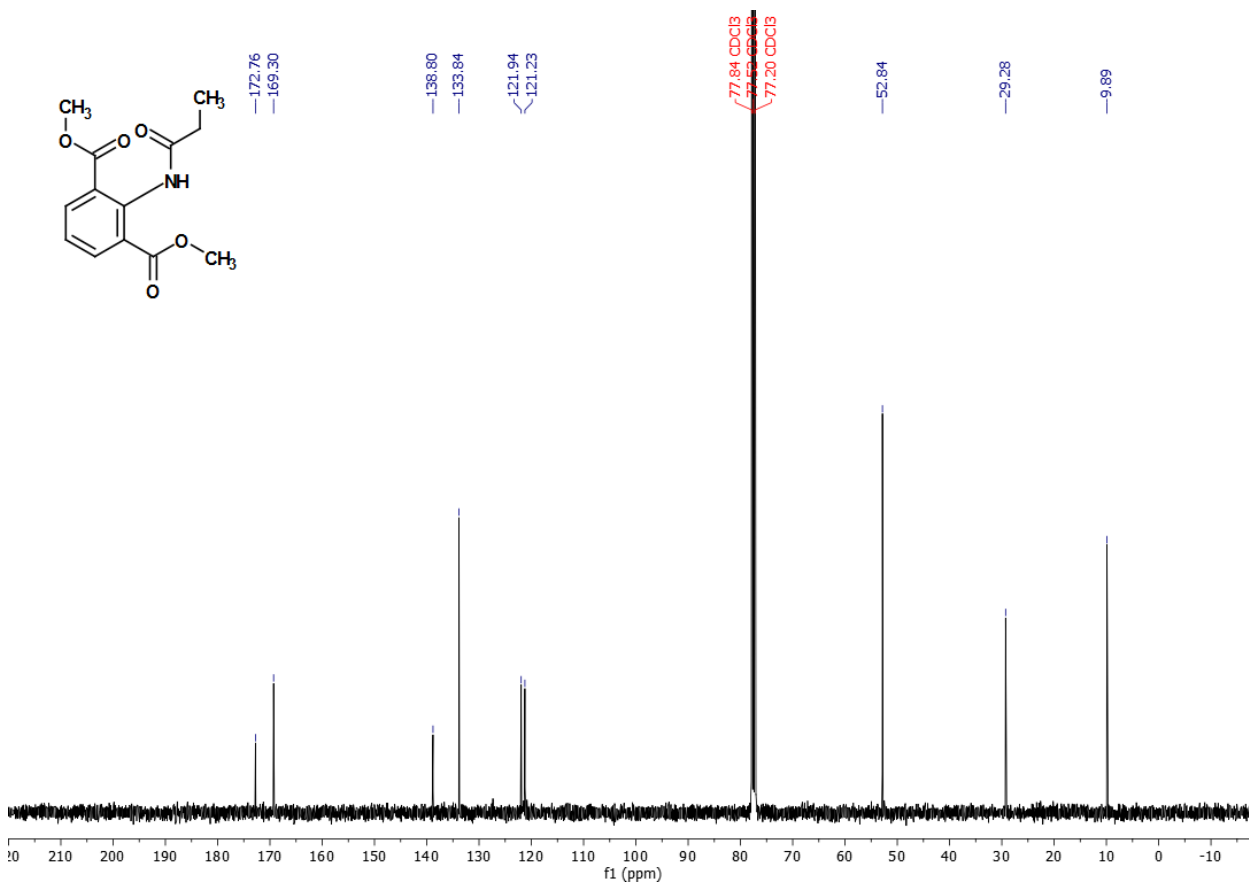



# $^1\text{H}$ and $^{13}\text{C}$ NMR *N*-(4-hydroxyphenyl)propionamide (**3t**)

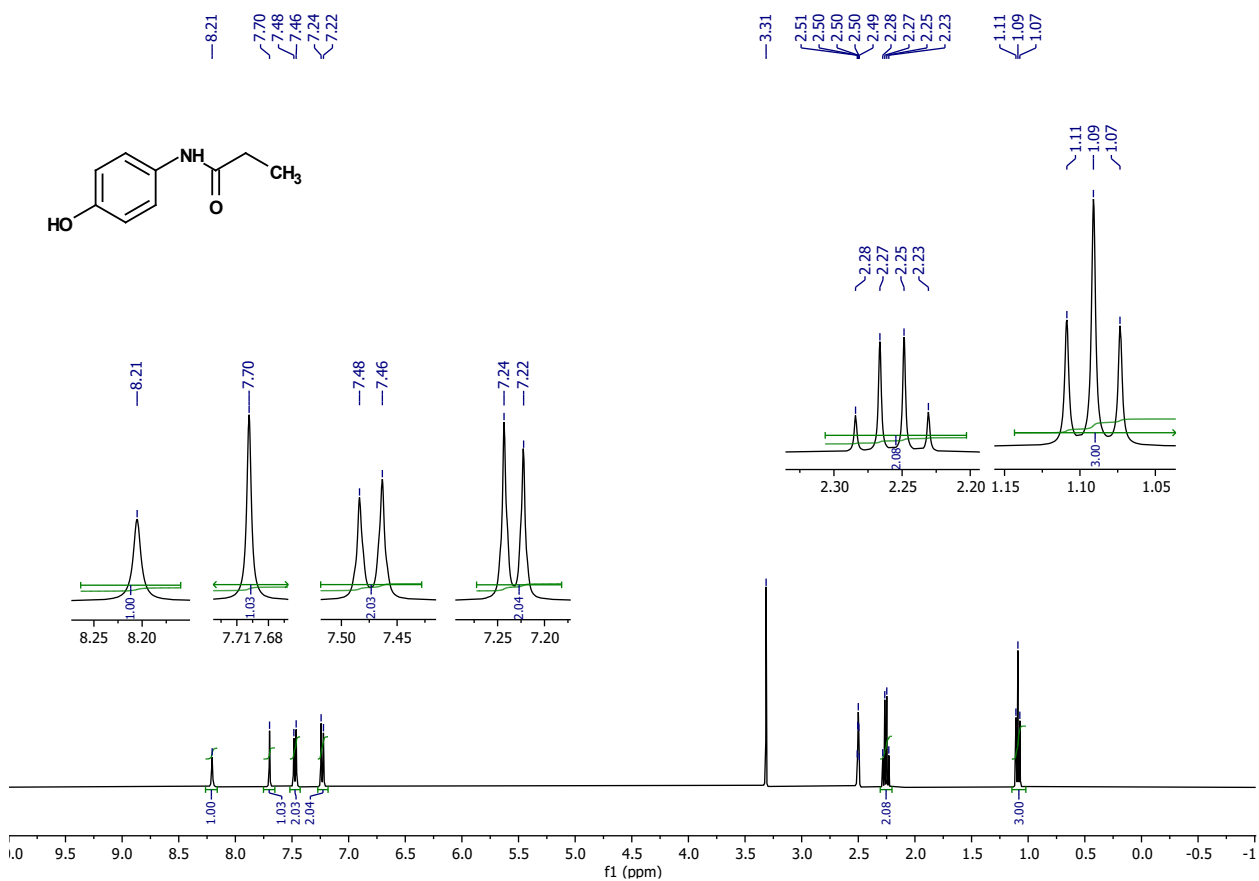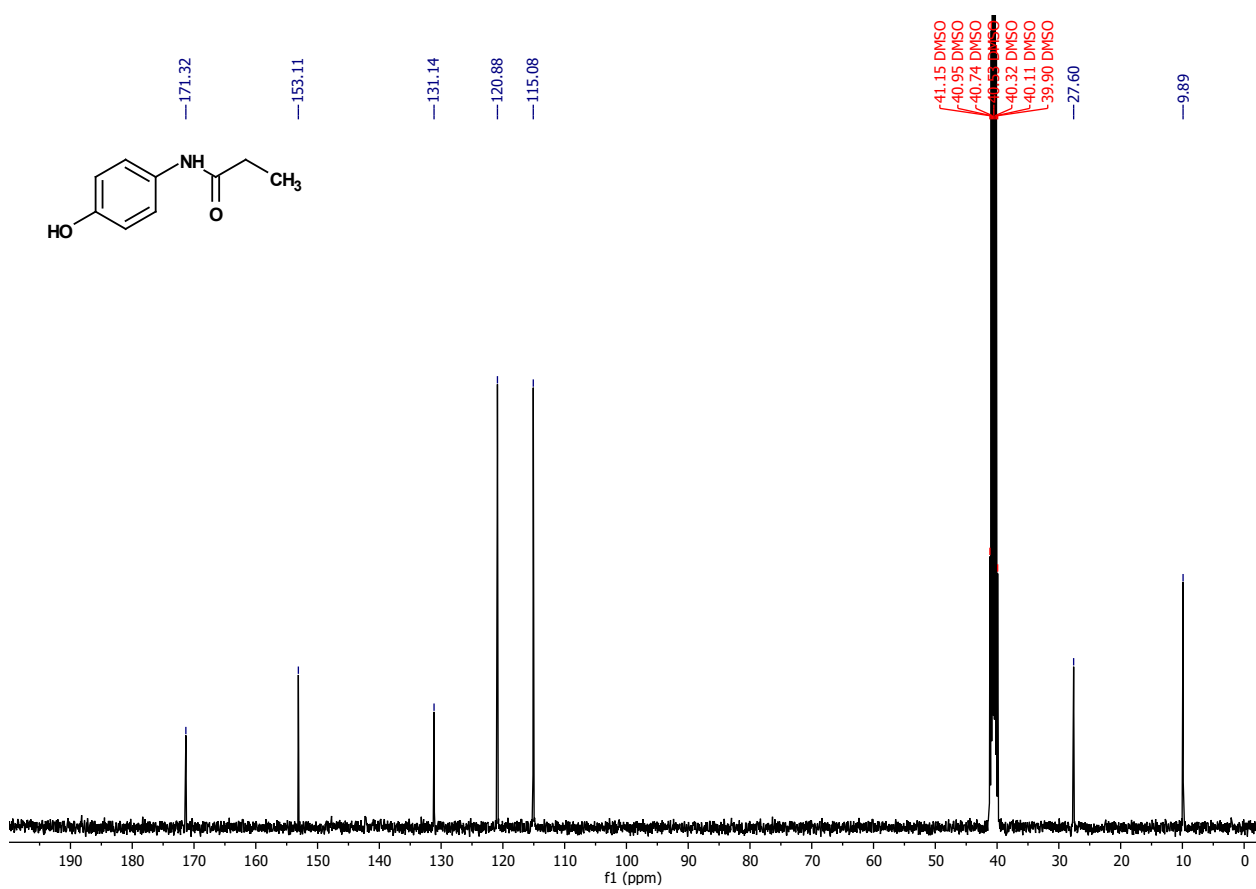

$^1\text{H}$  and  $^{13}\text{C}$  NMR *N*-(4-hydroxyphenyl)propionamide (**3u**)

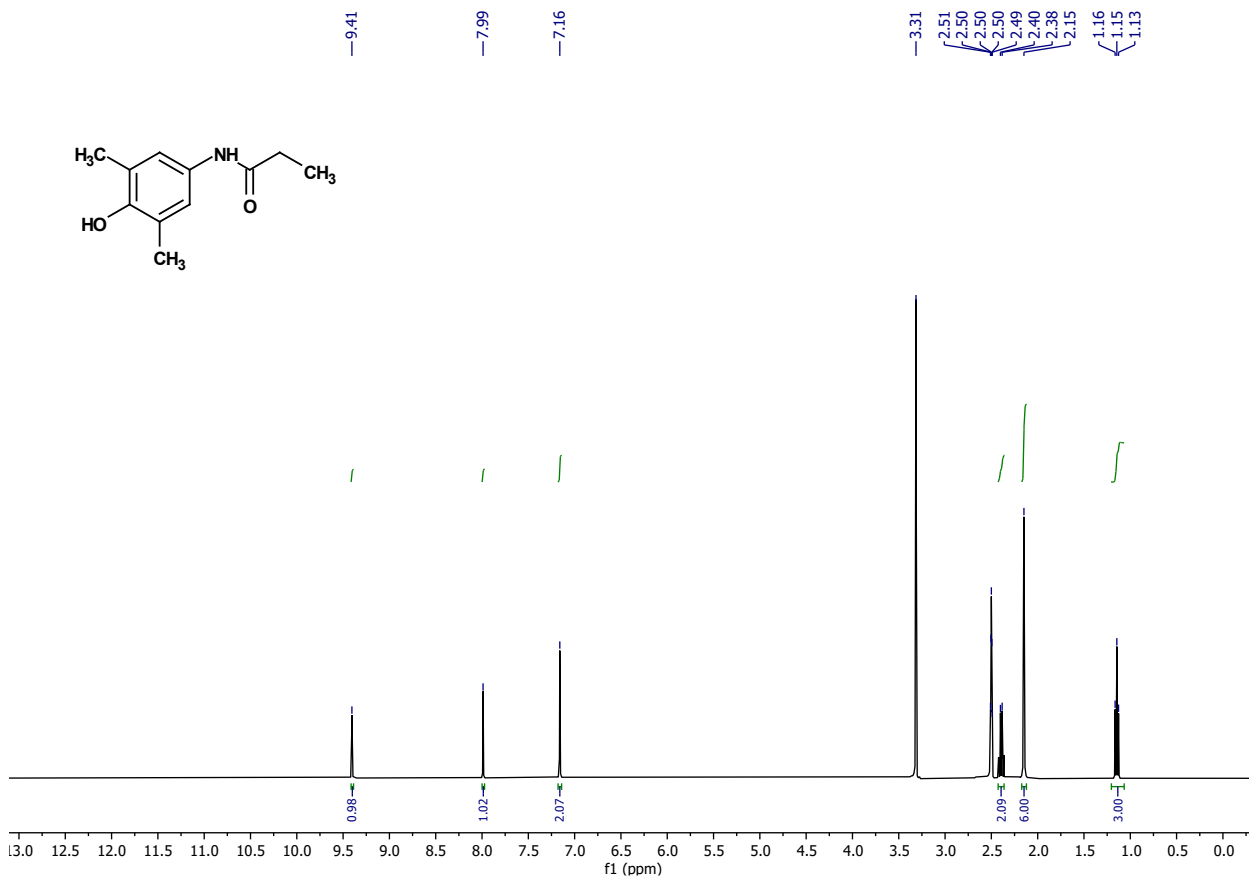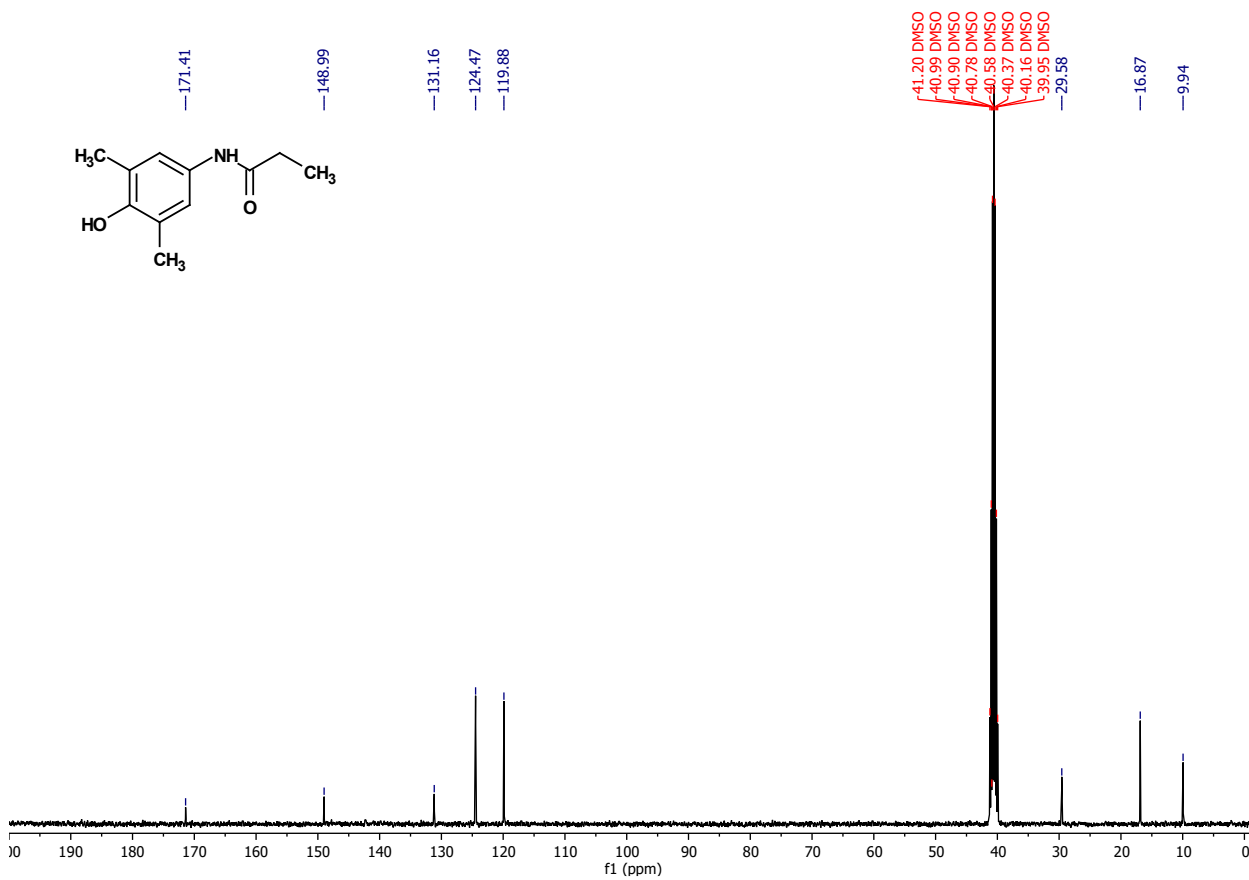

$^1\text{H}$  and  $^{13}\text{C}$  NMR *N*-(4-hydroxy-3-methylphenyl)propionamide (**3v**)

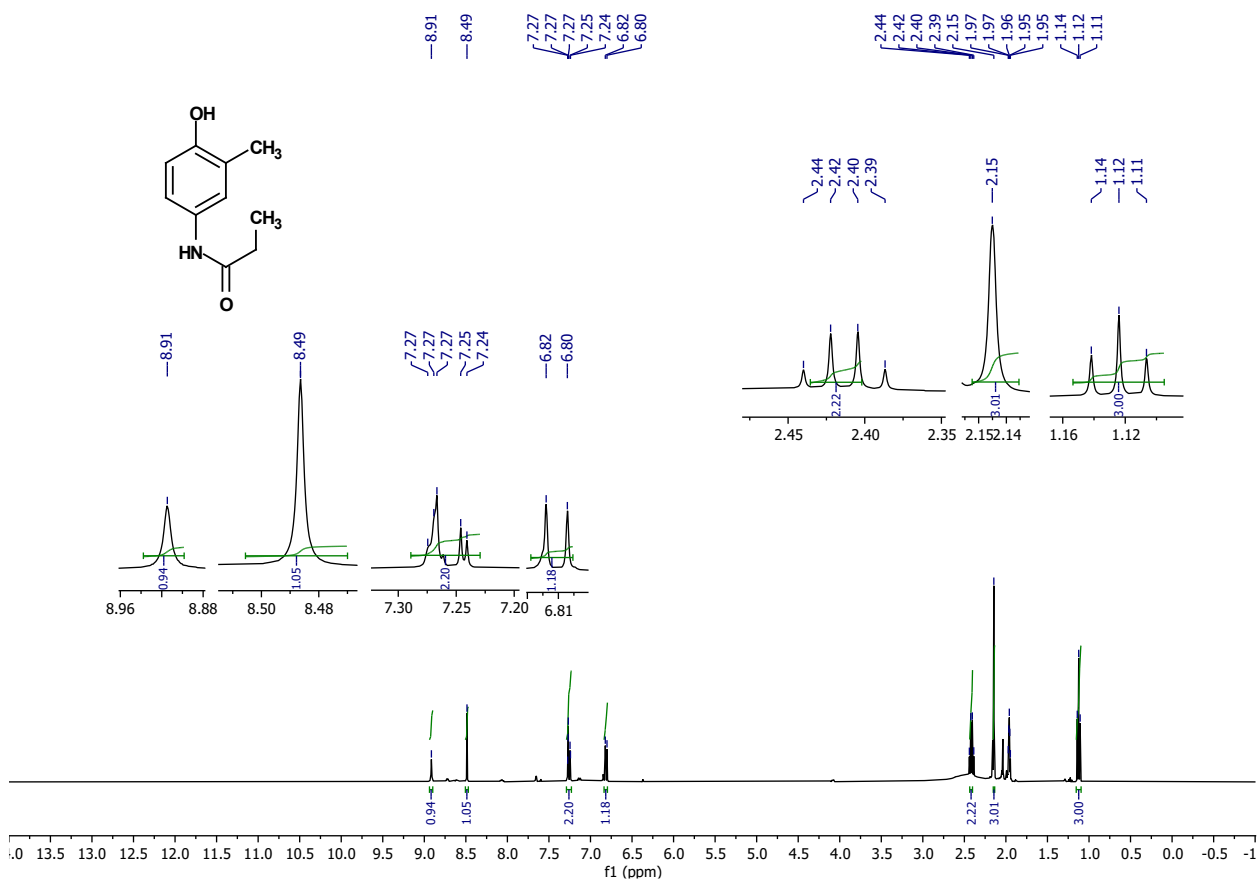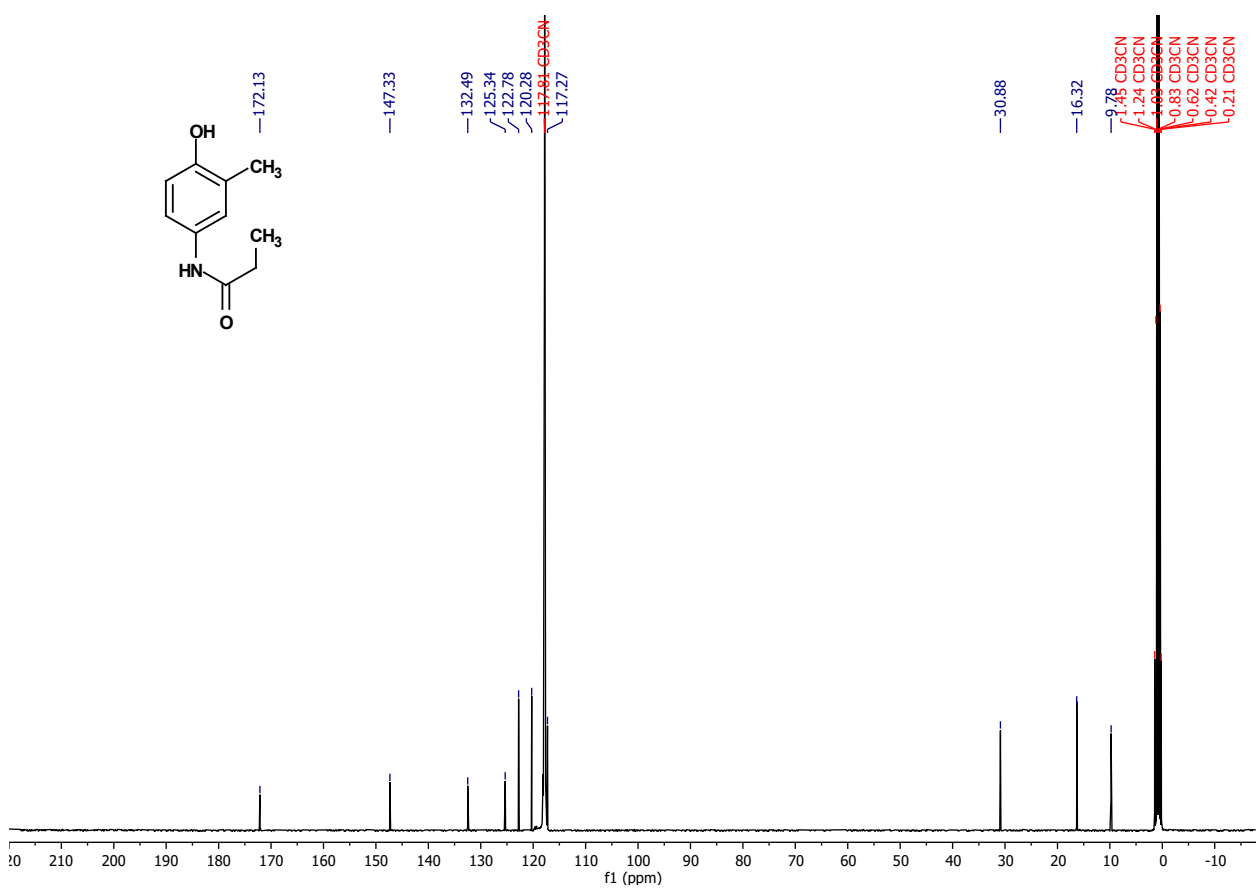

$^1\text{H}$  and  $^{13}\text{C}$  NMR Methyl 2-hydroxy-5-propionamidobenzoate (**3w**)

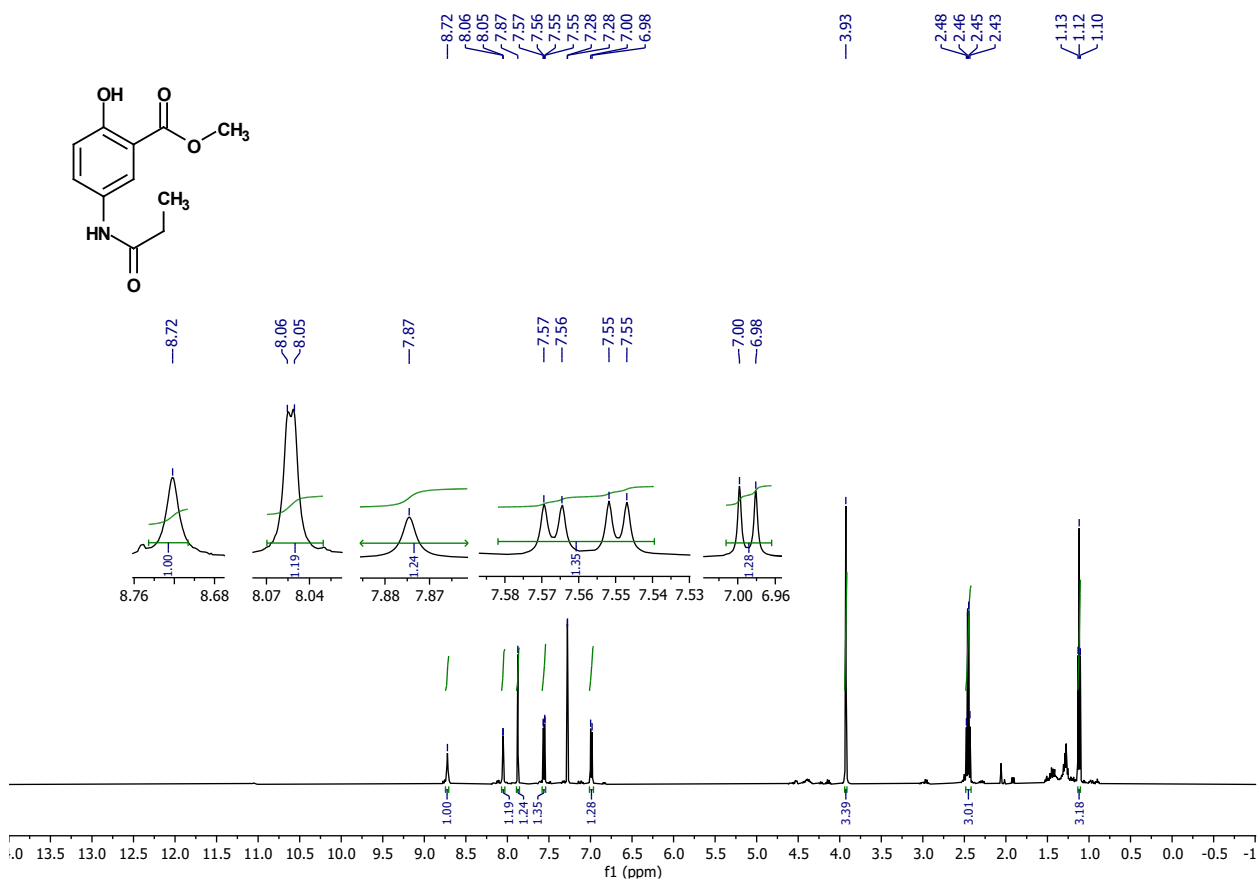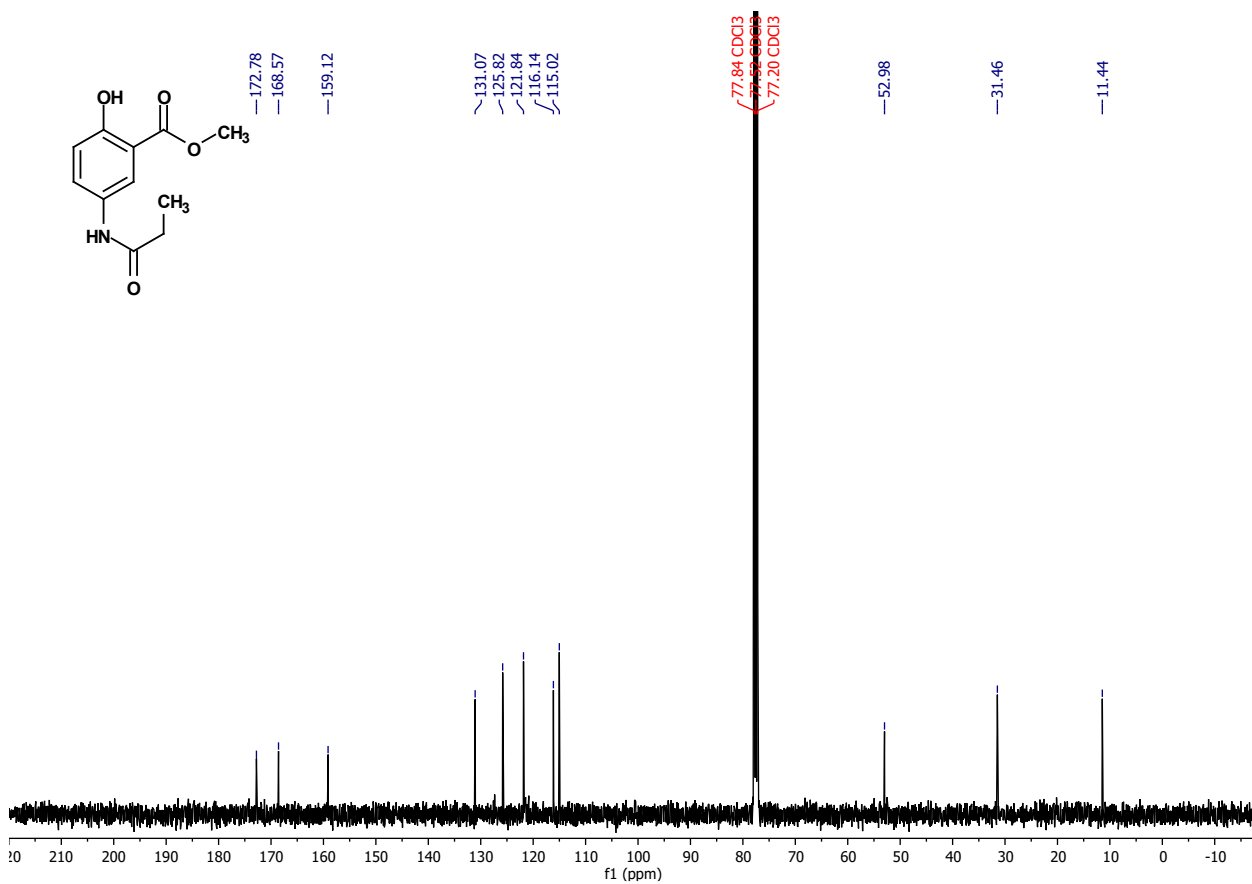

$^1\text{H}$  and  $^{13}\text{C}$  NMR Methyl 2-ethylbenzo[d]oxazole-7-carboxylate (**3ww**)

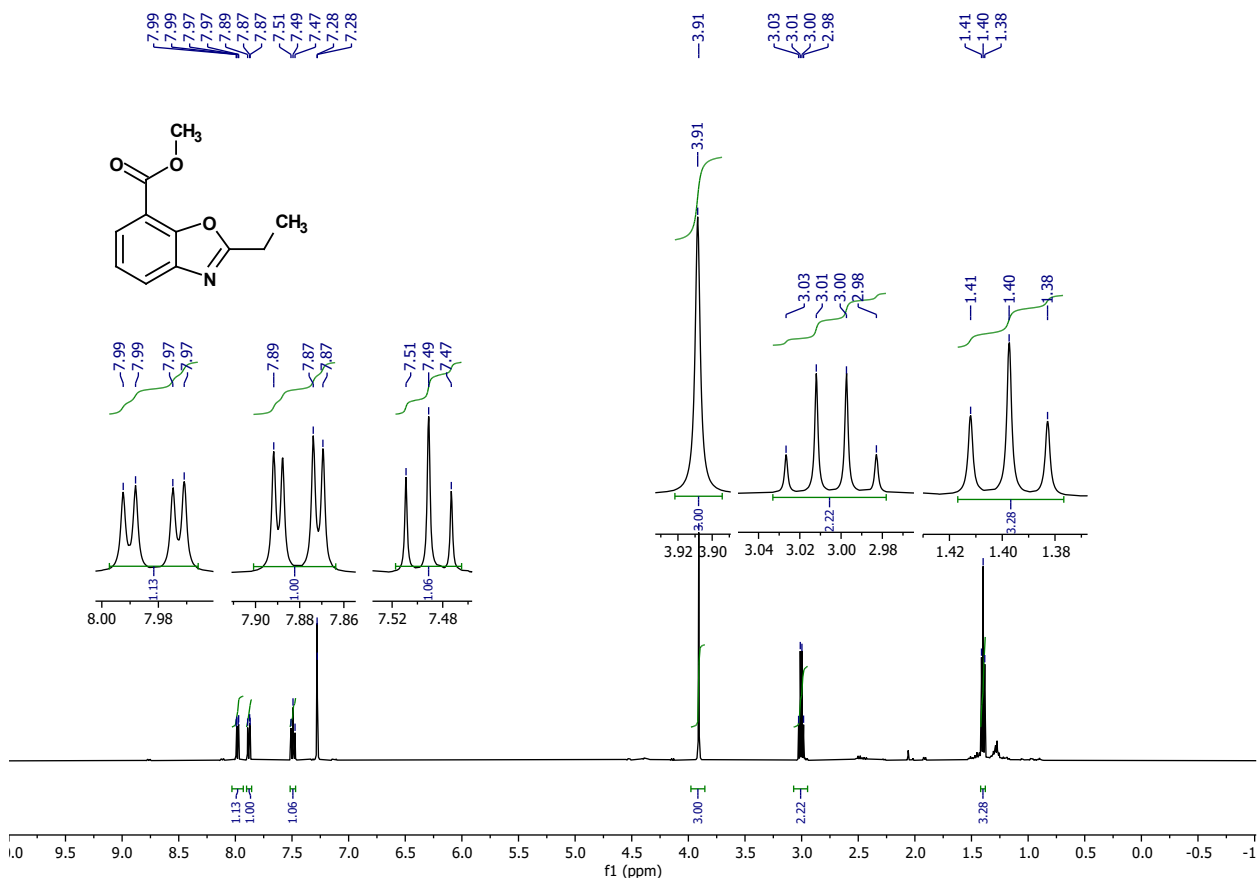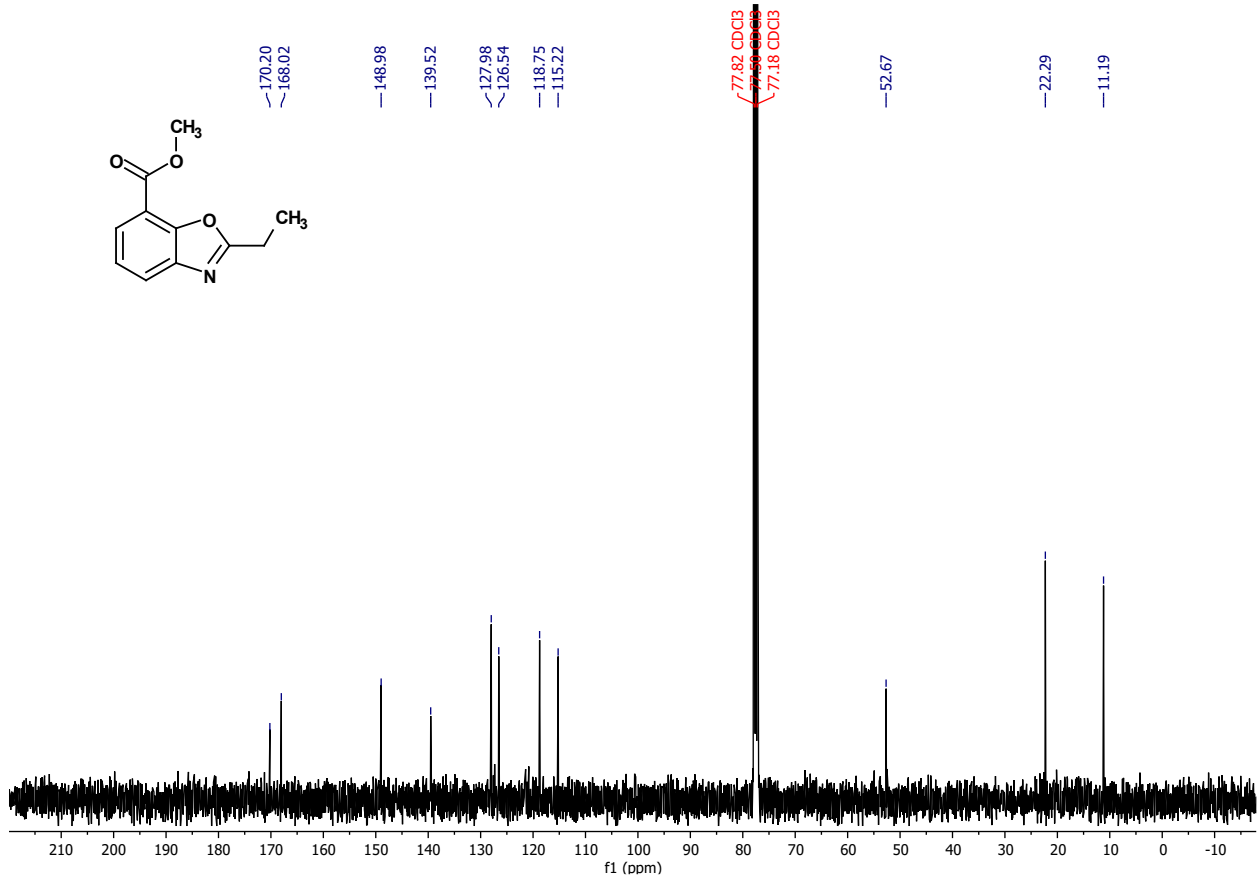

$^1\text{H}$  and  $^{13}\text{C}$  NMR Ethyl 2-hydroxy-5-propionamidobenzoate (**3x**)

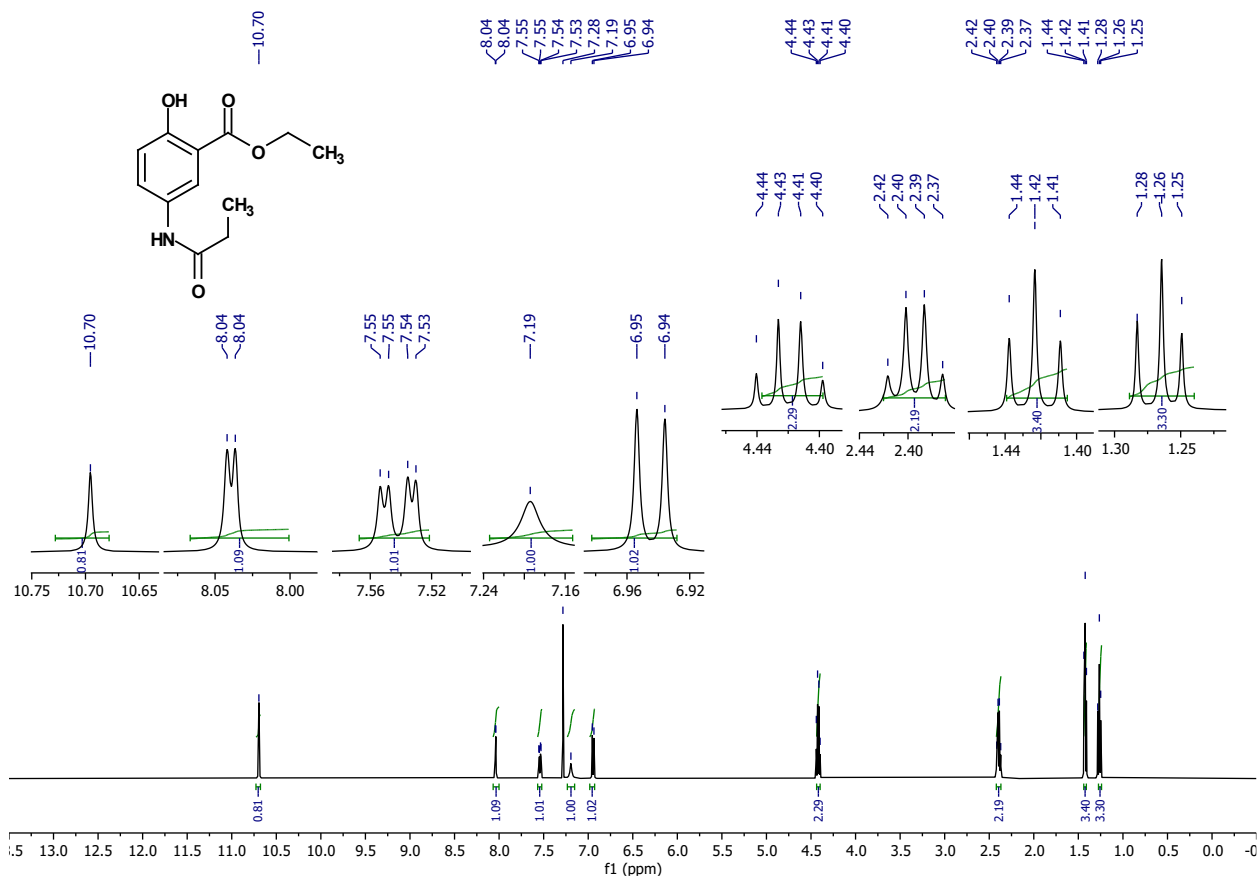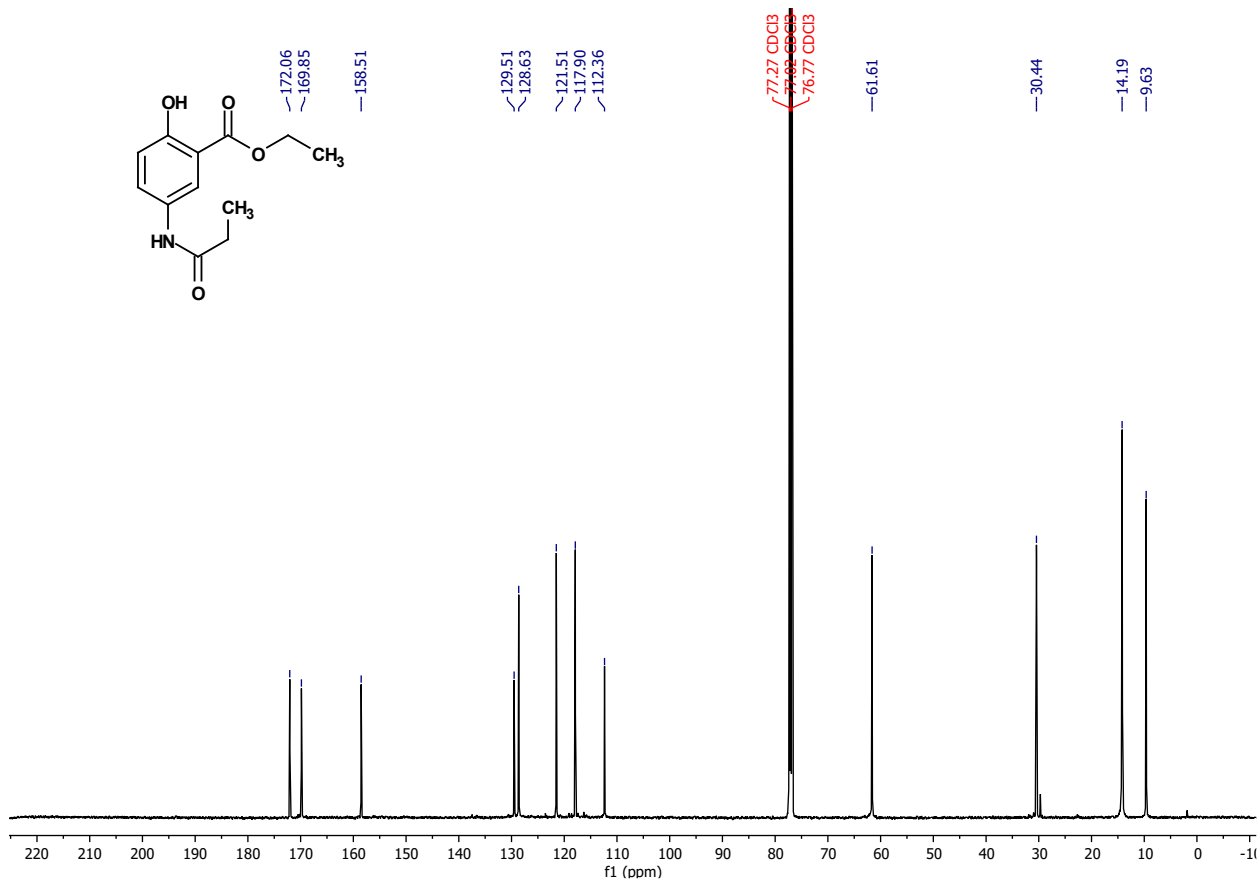

$^1\text{H}$  and  $^{13}\text{C}$  NMR Ethyl 2-ethylbenzo[d]oxazole-7-carboxylate (**3xx**)

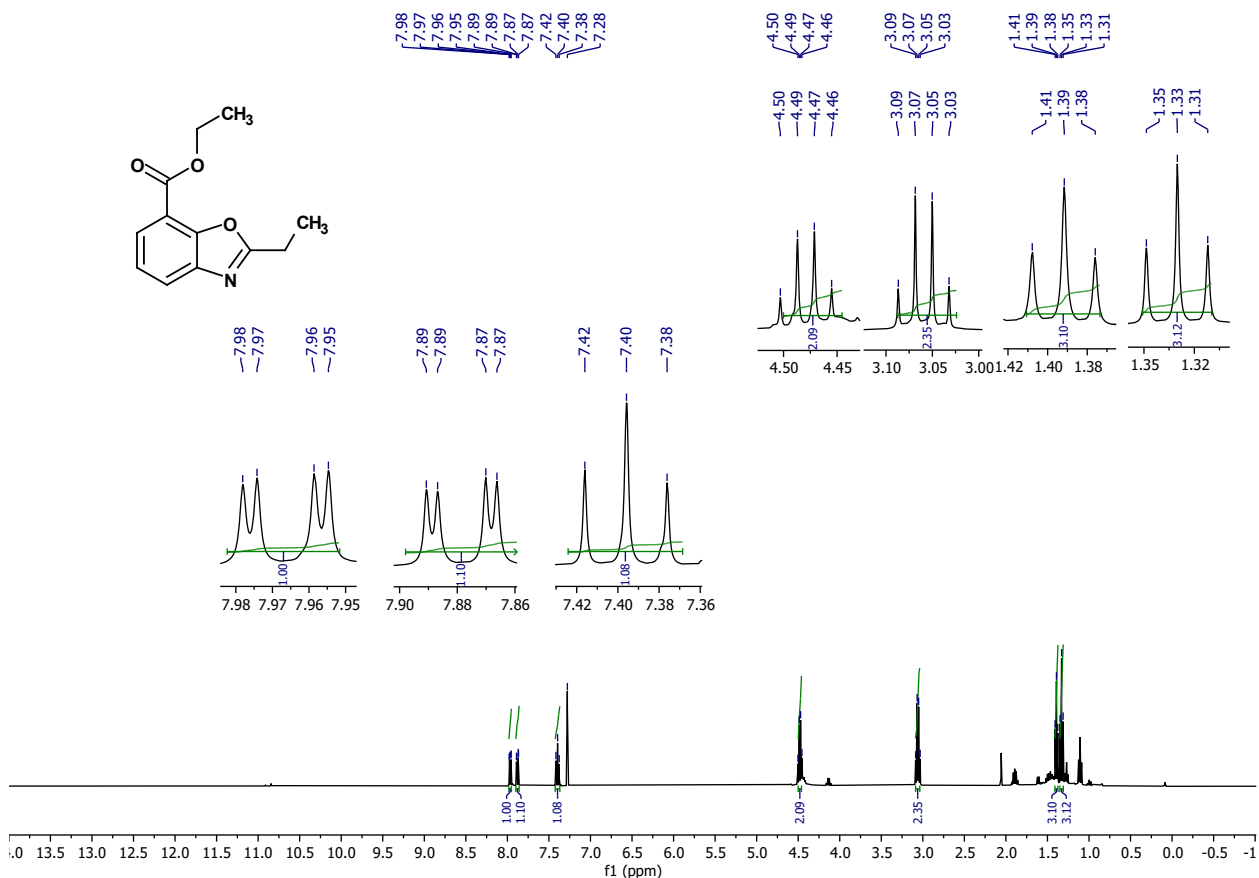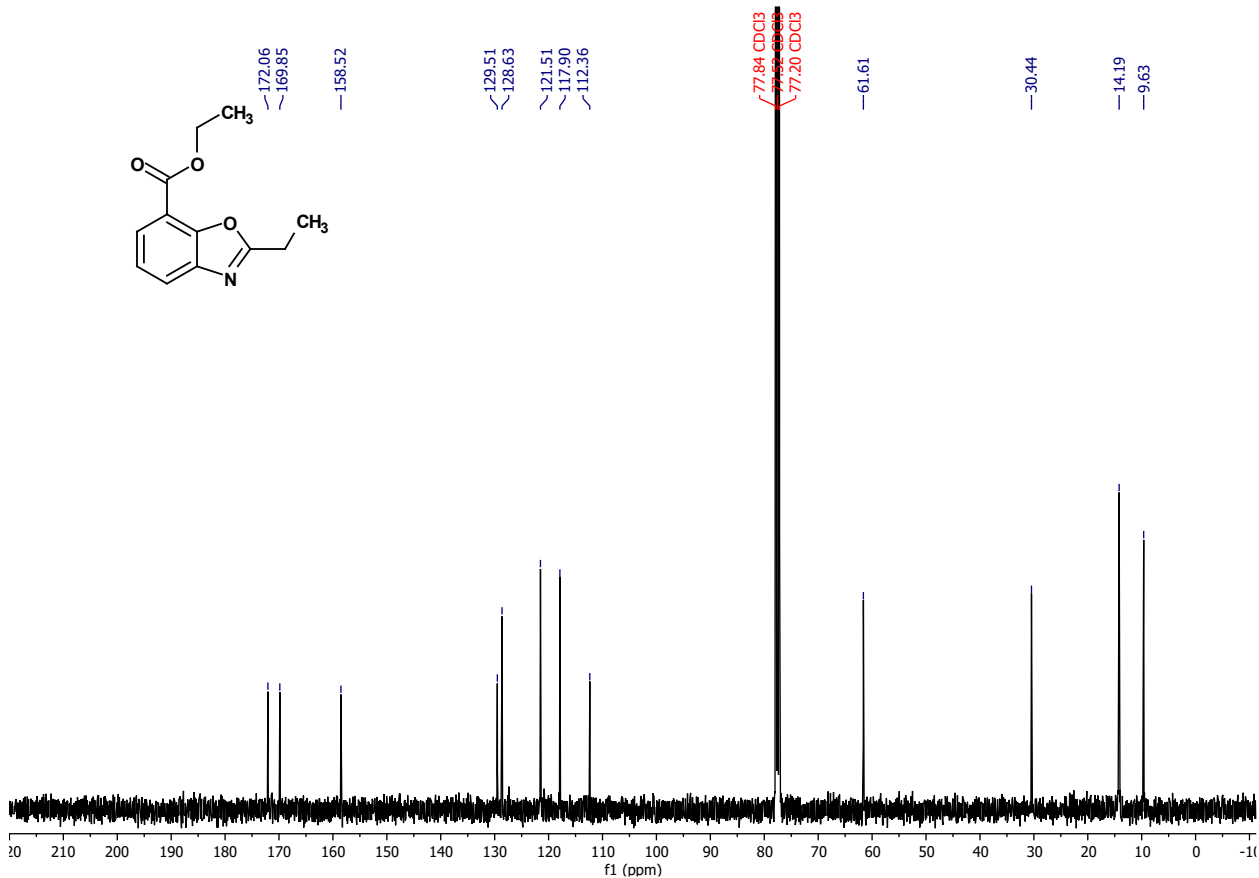

$^1\text{H}$  and  $^{13}\text{C}$  NMR *N*-(2,5-bis(trifluoromethyl)phenyl)butyramide (**4a**)

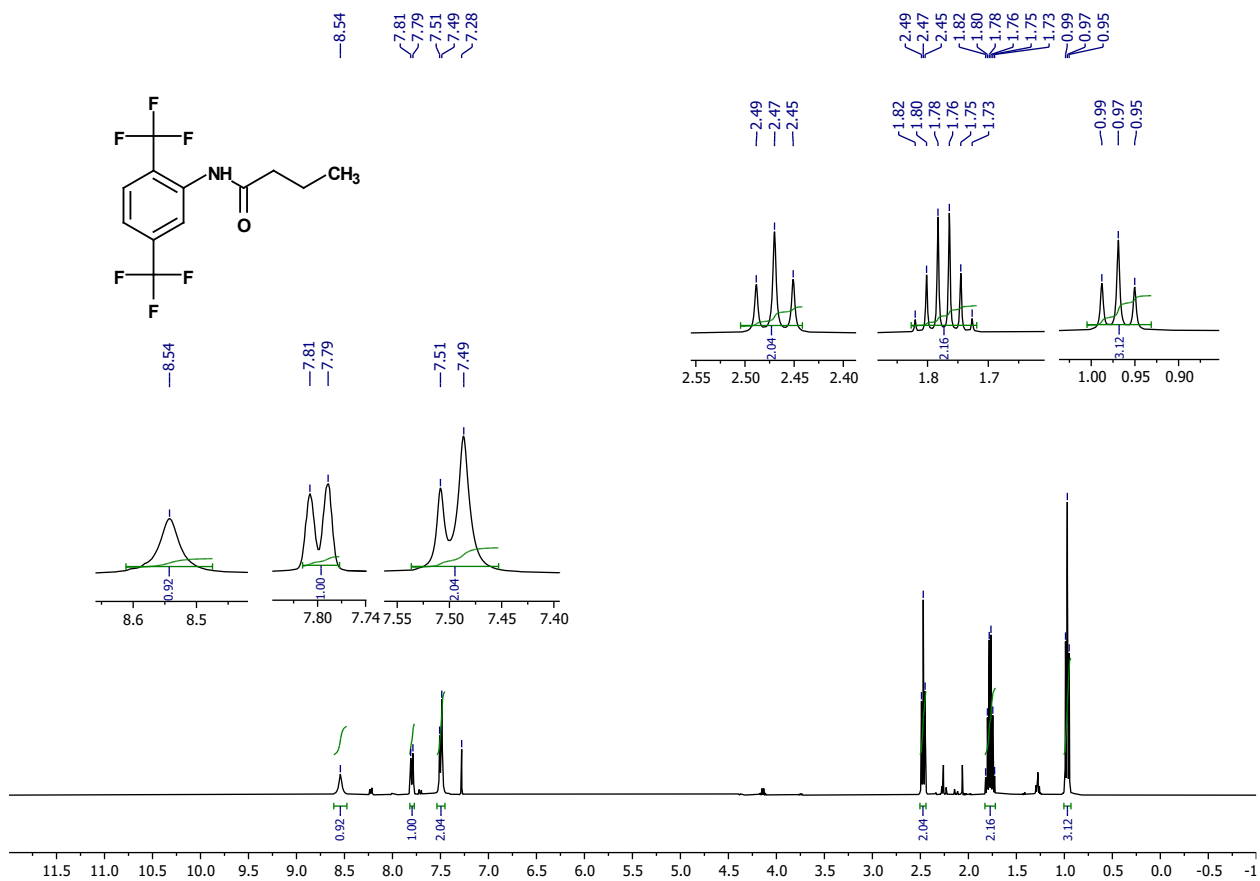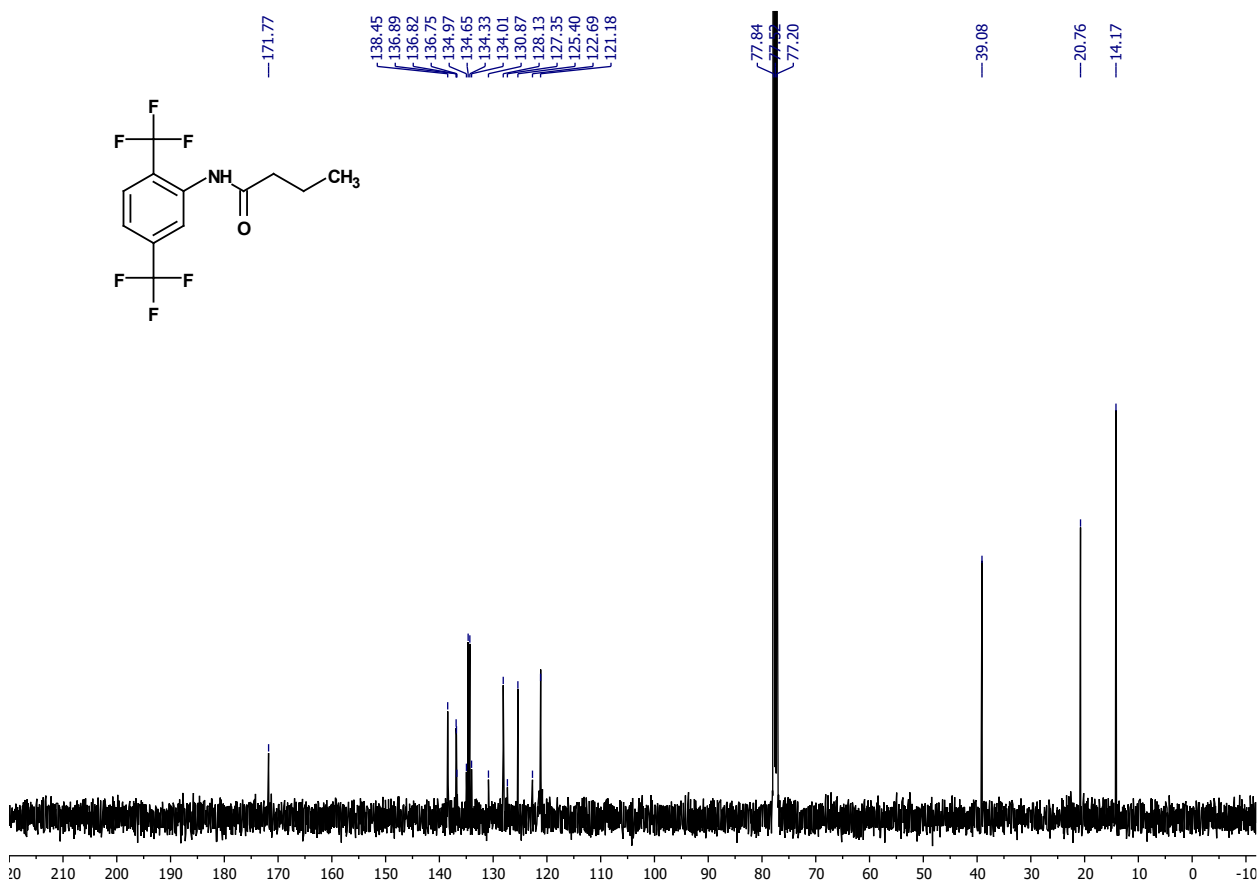



$^1\text{H}$  and  $^{13}\text{C}$  NMR *N*-(2,6-bis(trifluoromethyl)phenyl)butyramide (**4b**)

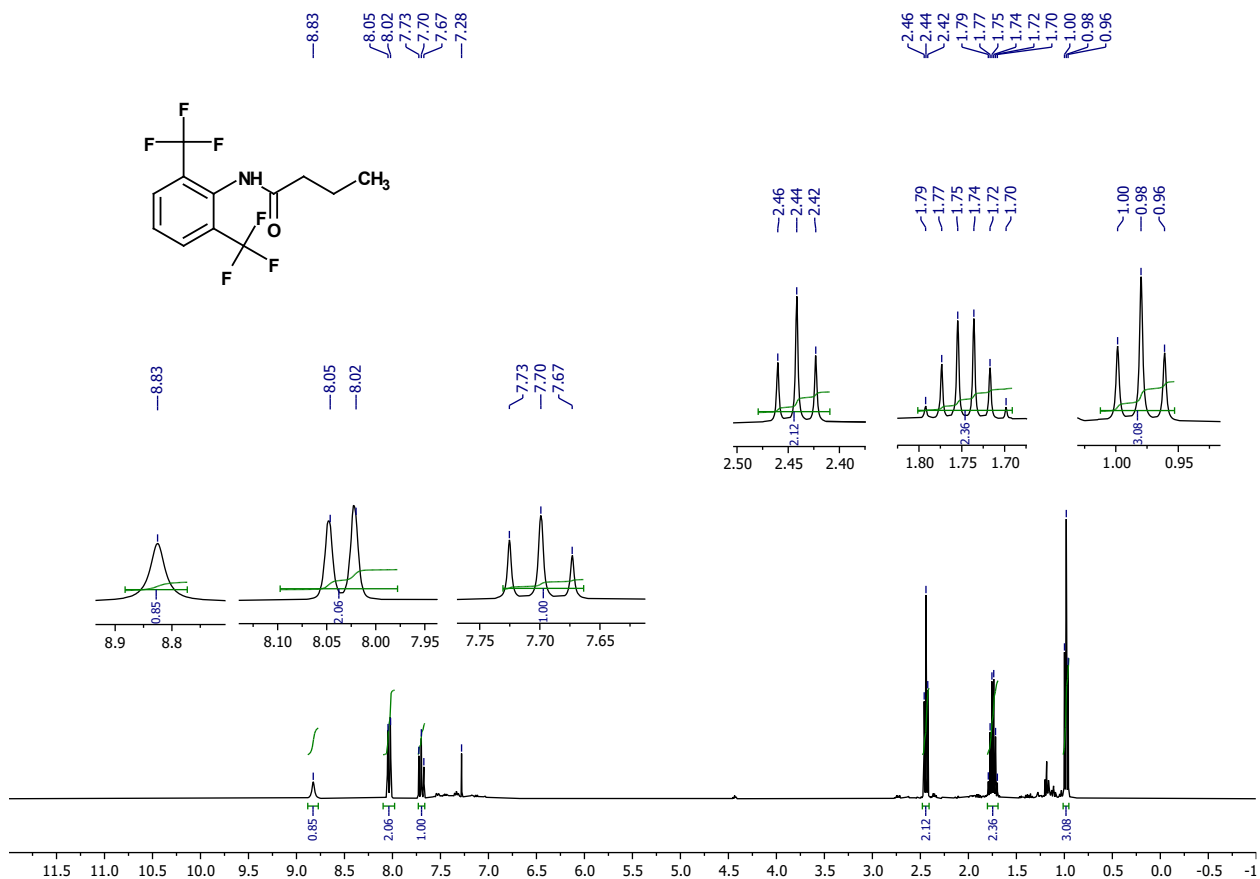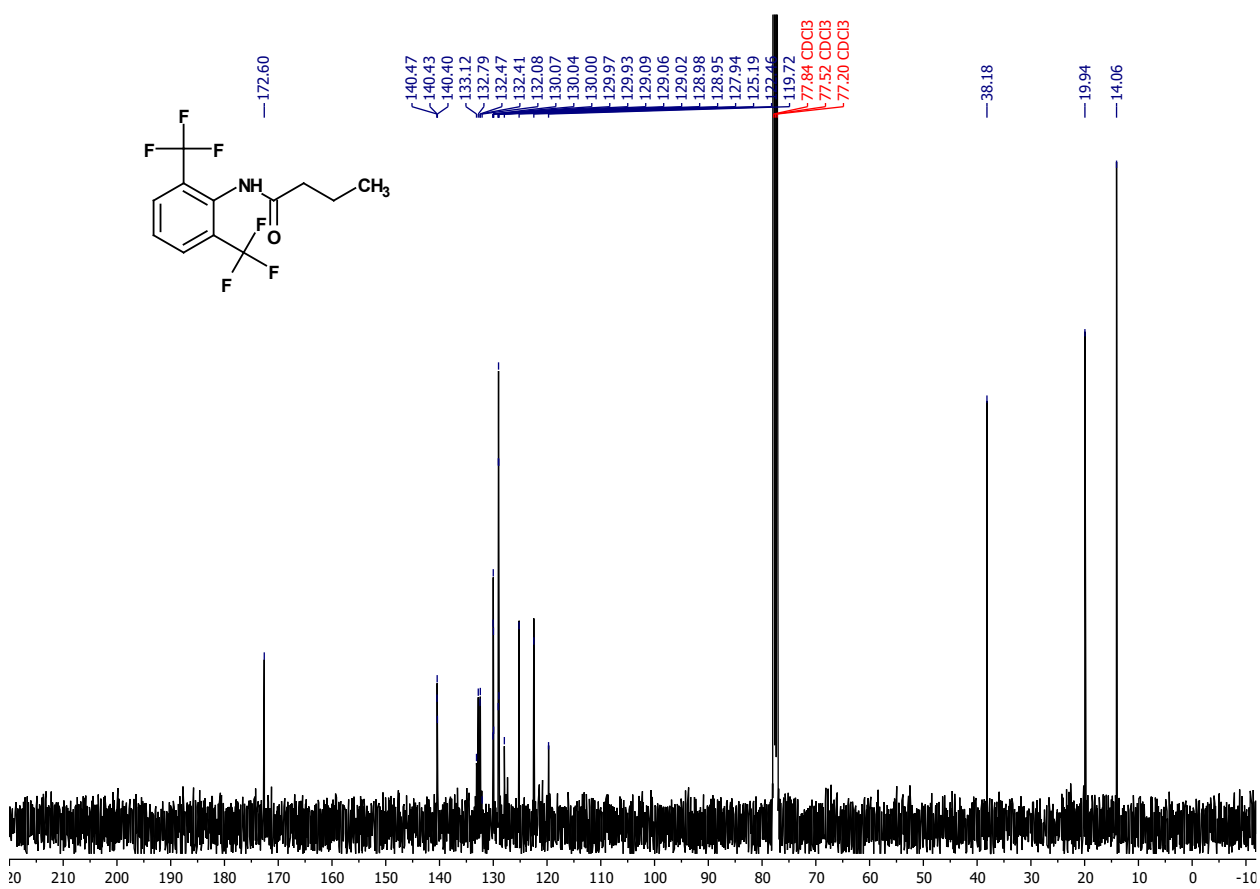

$^1\text{H}$  and  $^{13}\text{C}$  NMR *N*-(2-chloro-5-(trifluoromethyl)phenyl)butyramide (**4e**)

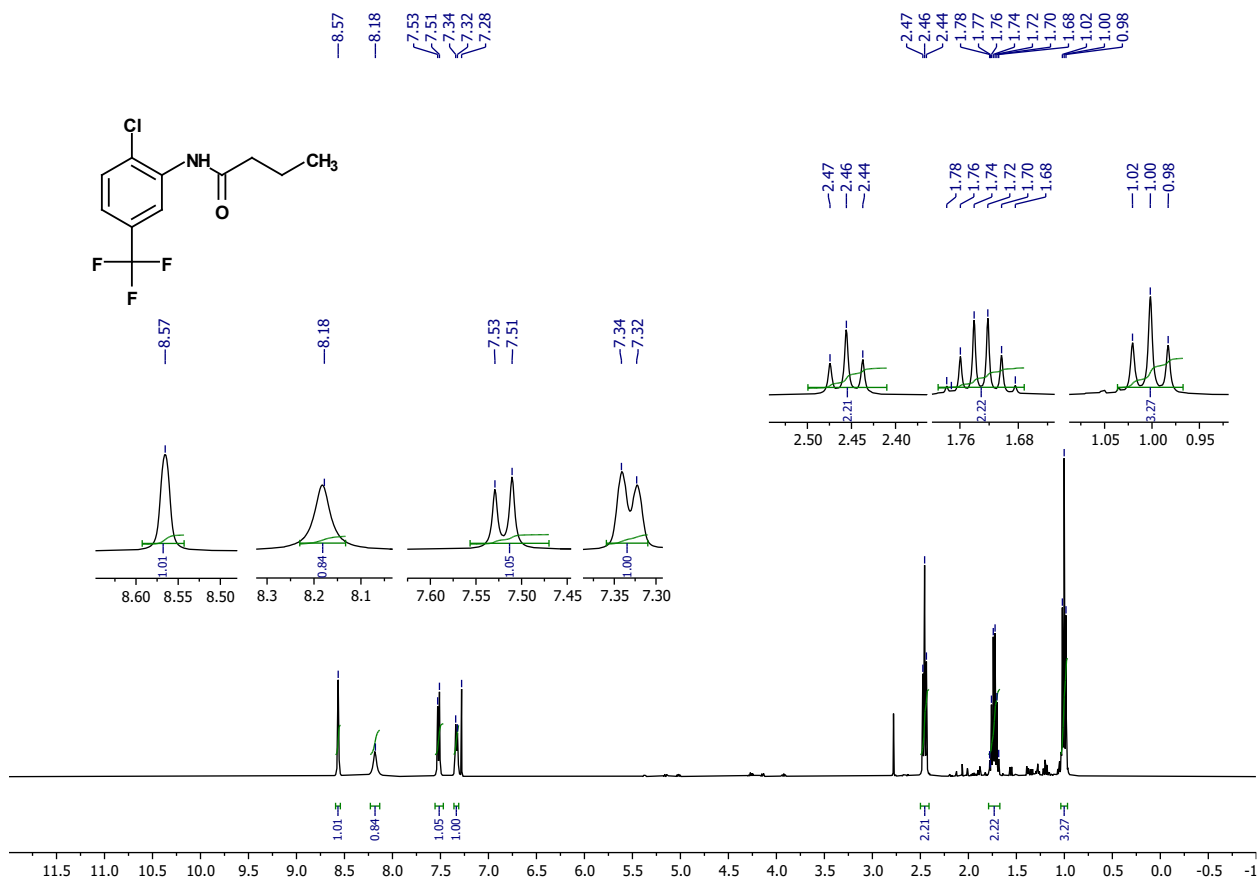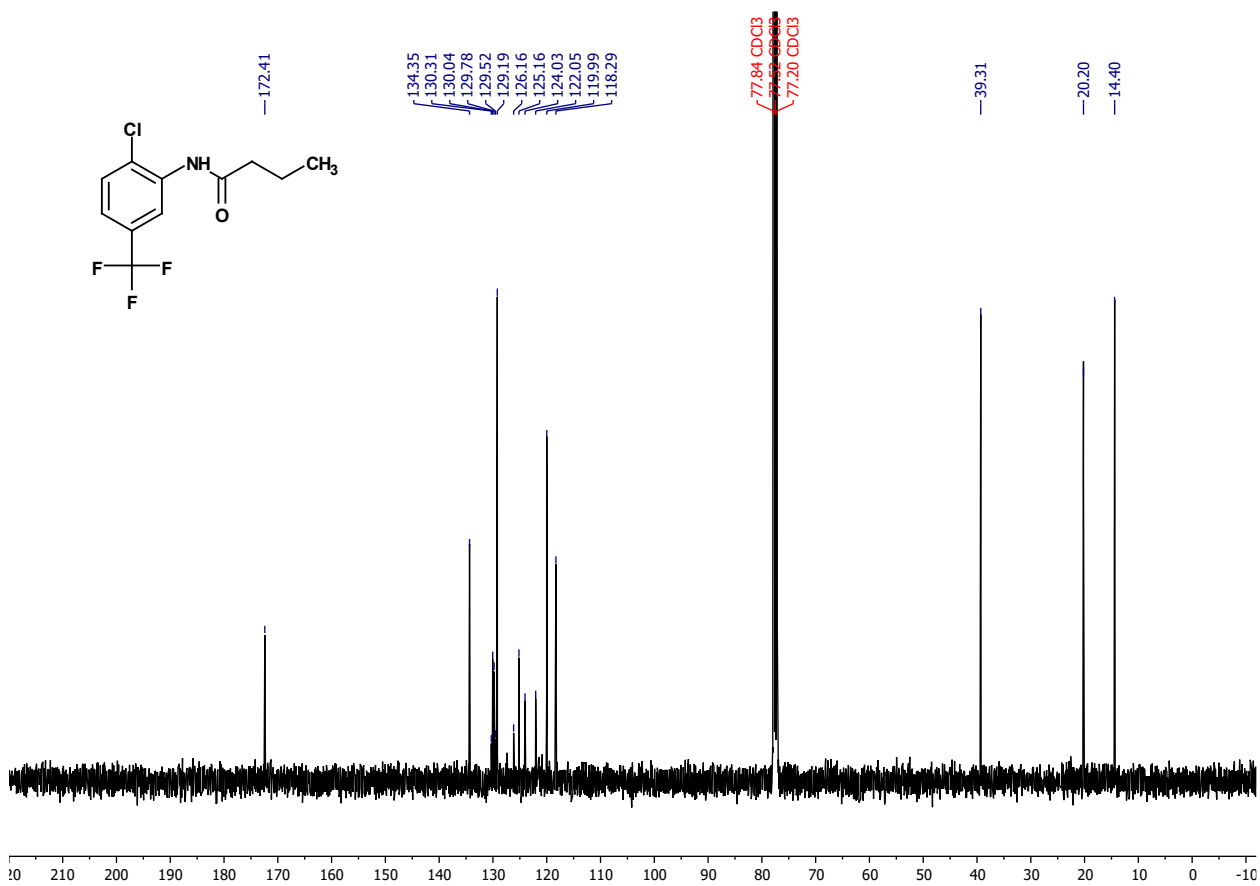

$^1\text{H}$  and  $^{13}\text{C}$  NMR *N*-(4-fluorophenyl)butyramide (**4f**)

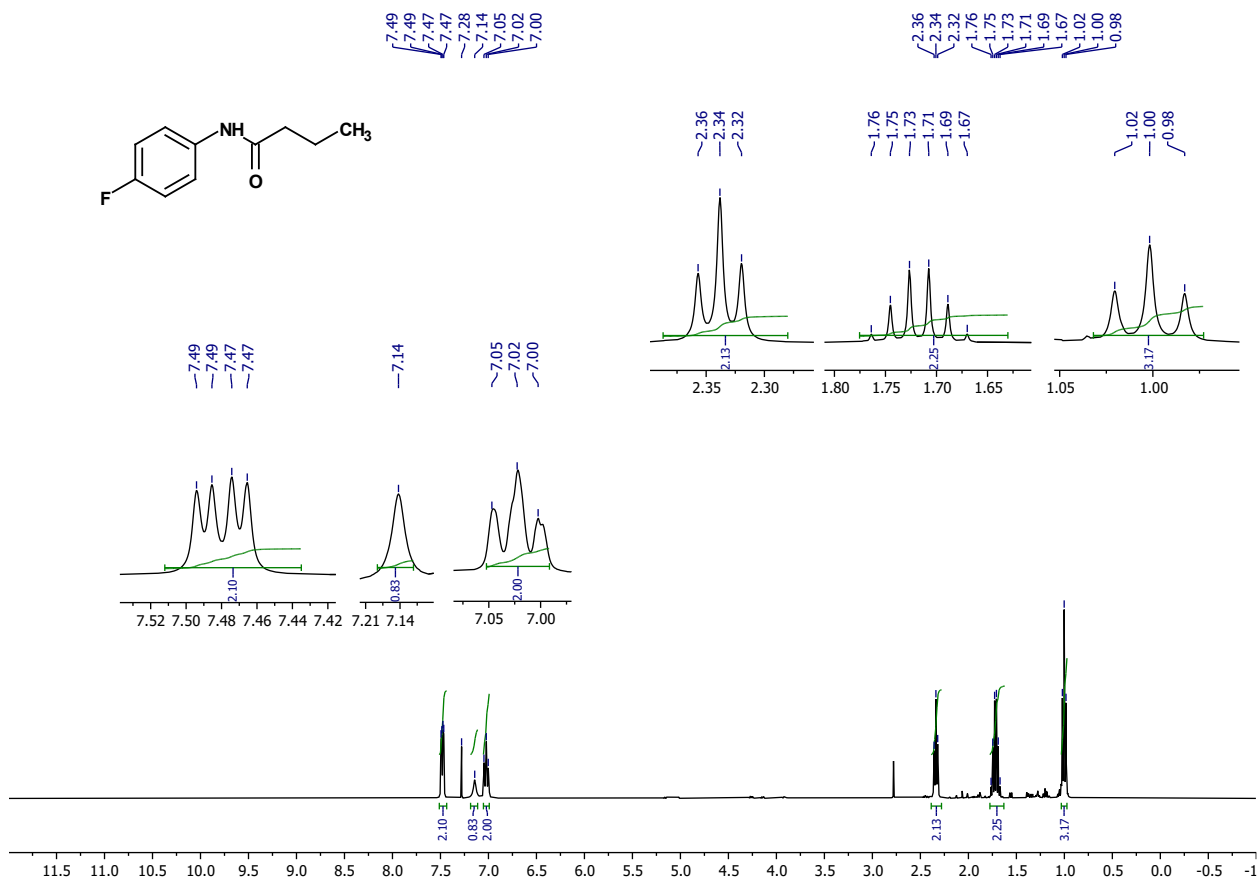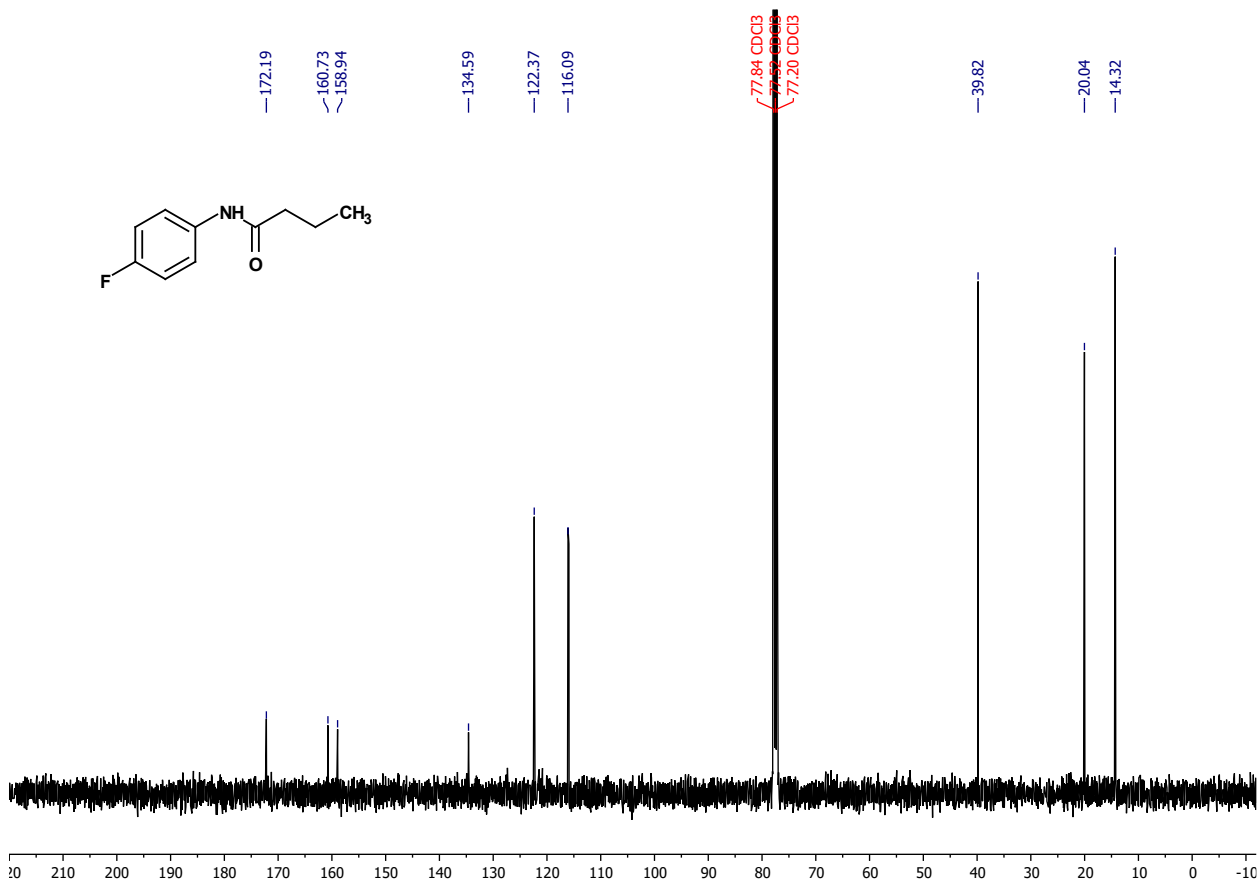

$^1\text{H}$  and  $^{13}\text{C}$  NMR *N*-(5-chloro-2-hydroxyphenyl)butyramide (**4i**)

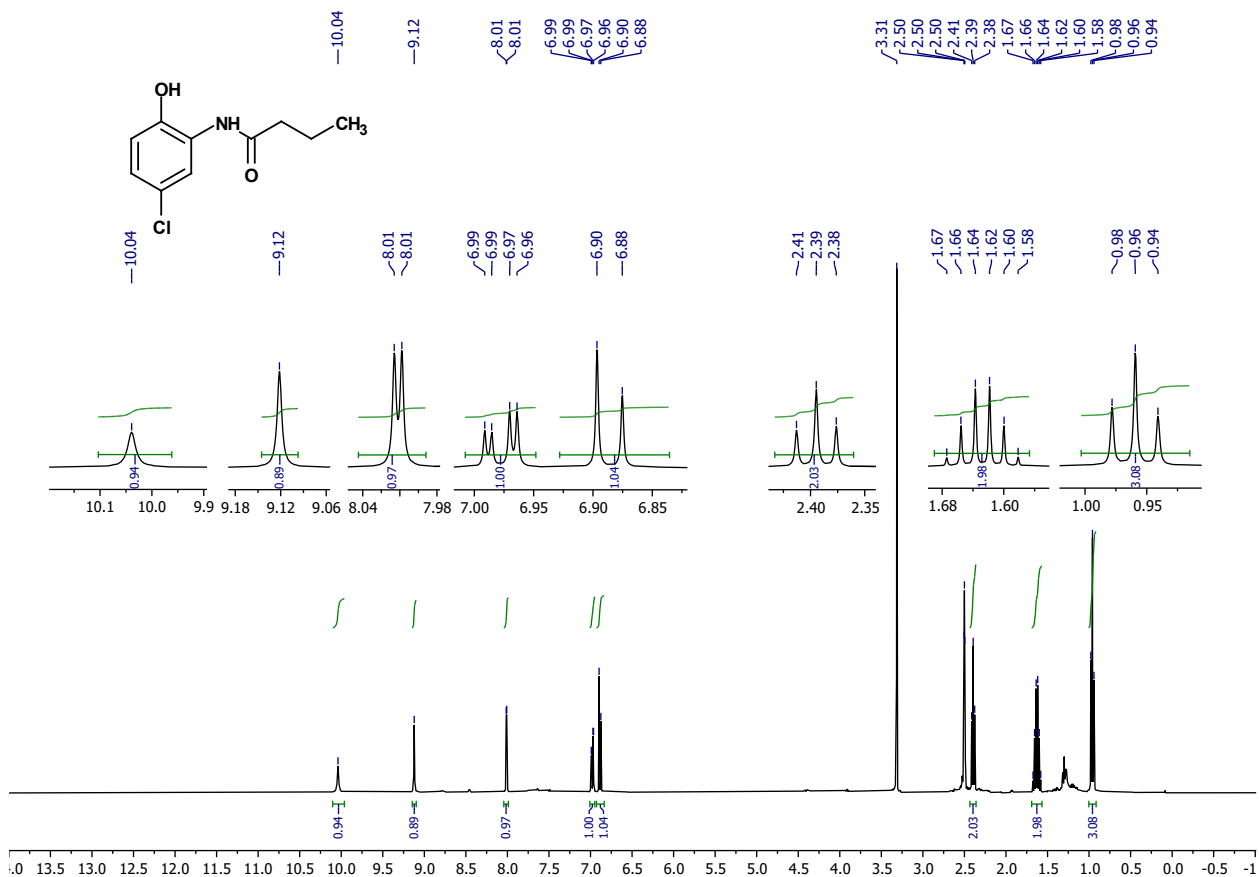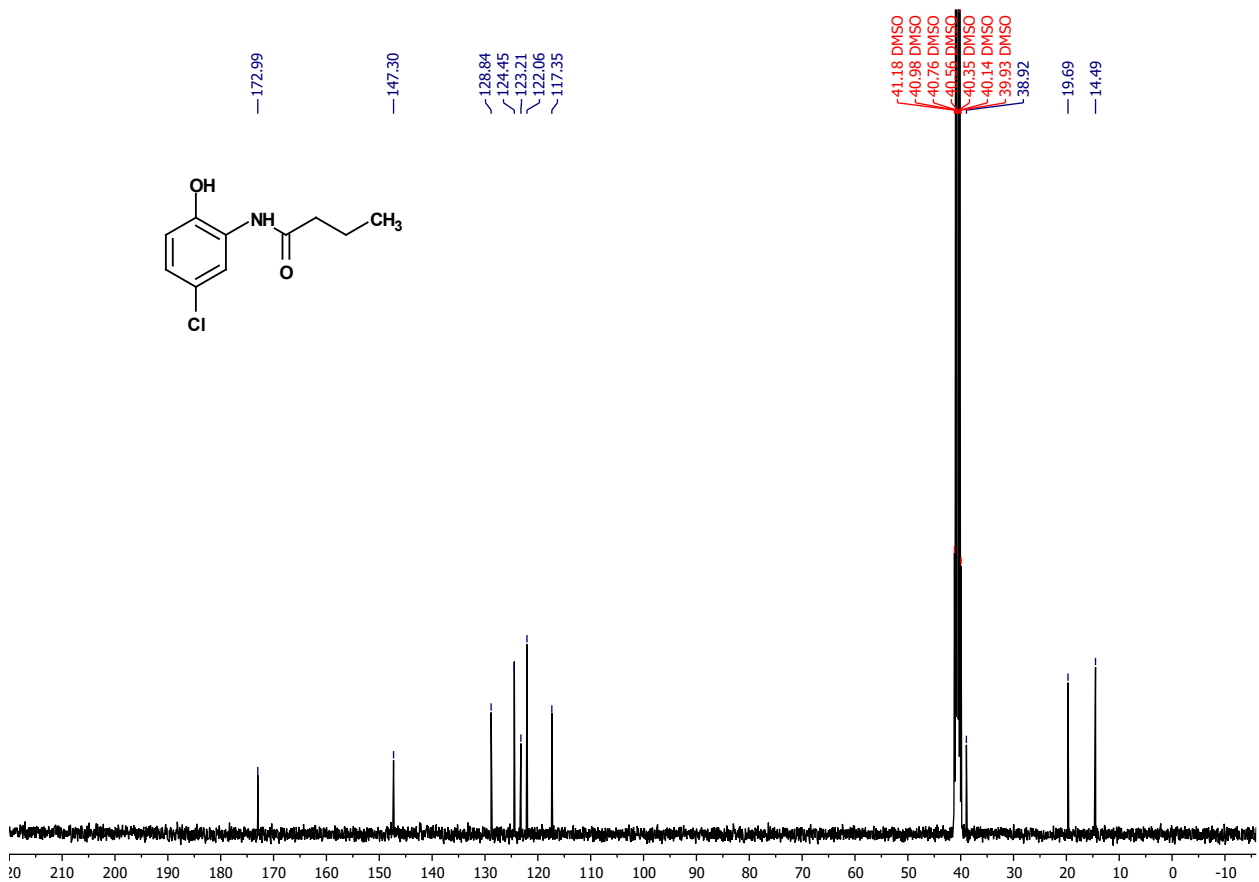

$^1\text{H}$  and  $^{13}\text{C}$  NMR 5-chloro-2-propylbenzo[d]oxazole (**4ii**)

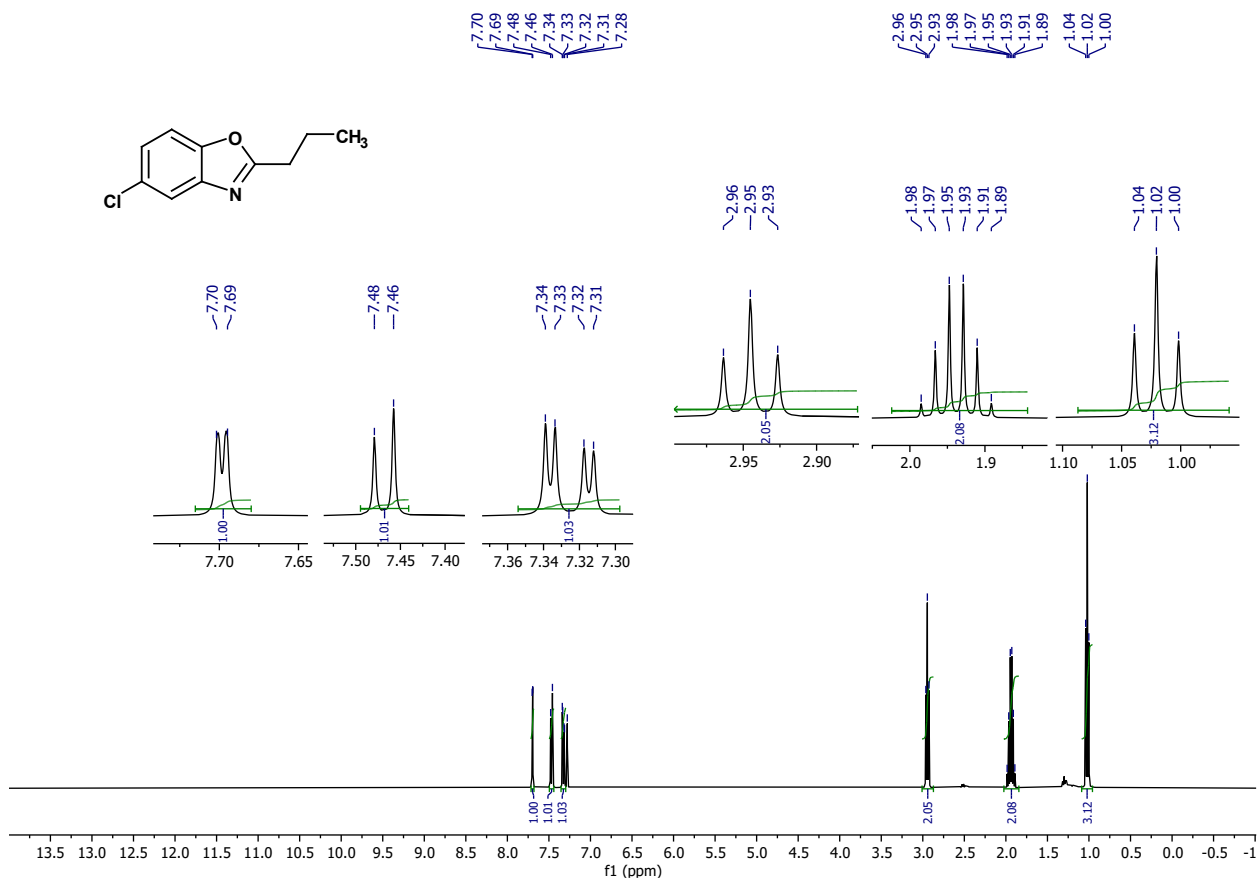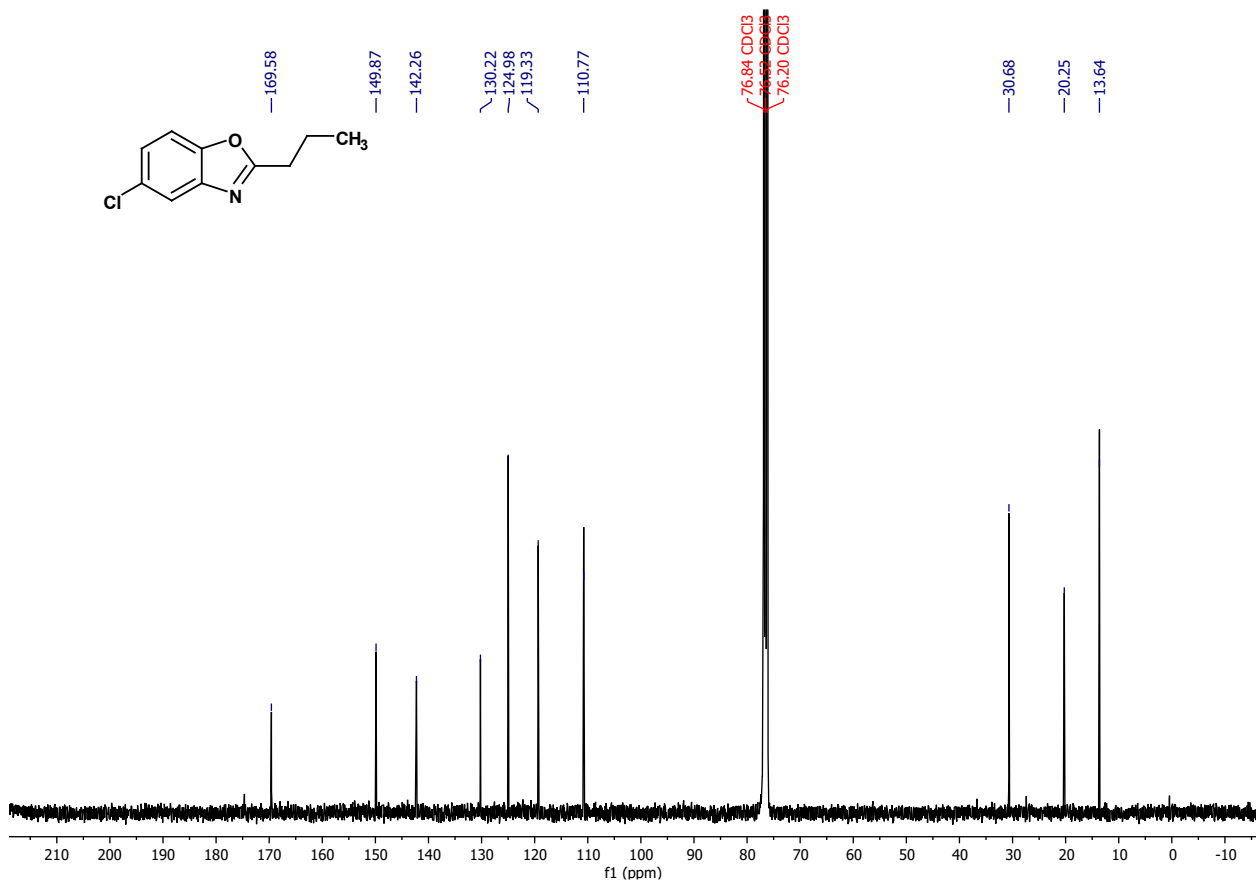

$^1\text{H}$  and  $^{13}\text{C}$  NMR *N*-(5-bromo-2-hydroxyphenyl)butyramide (**4j**)

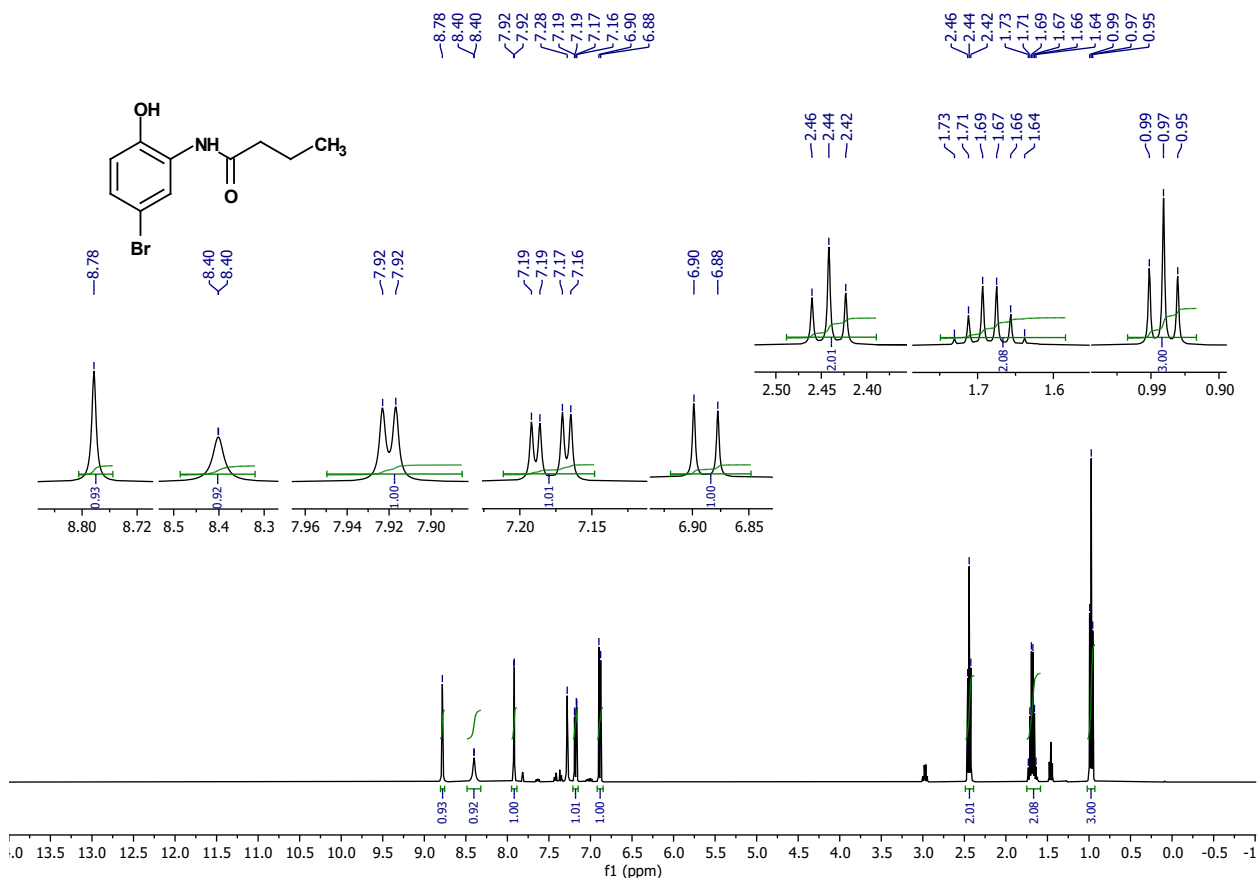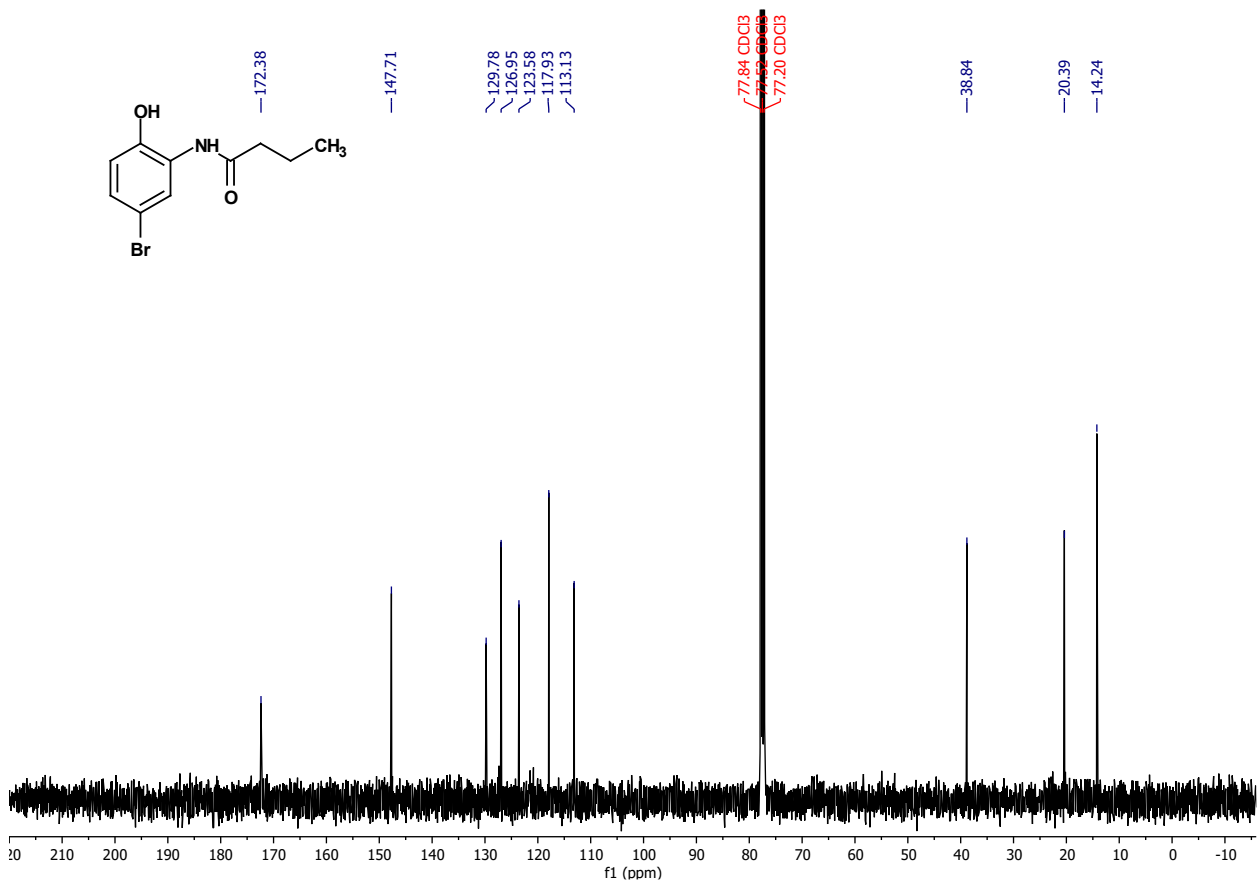

$^1\text{H}$  and  $^{13}\text{C}$  NMR 5-bromo-2-propylbenzo[d]oxazole (**4jj**)

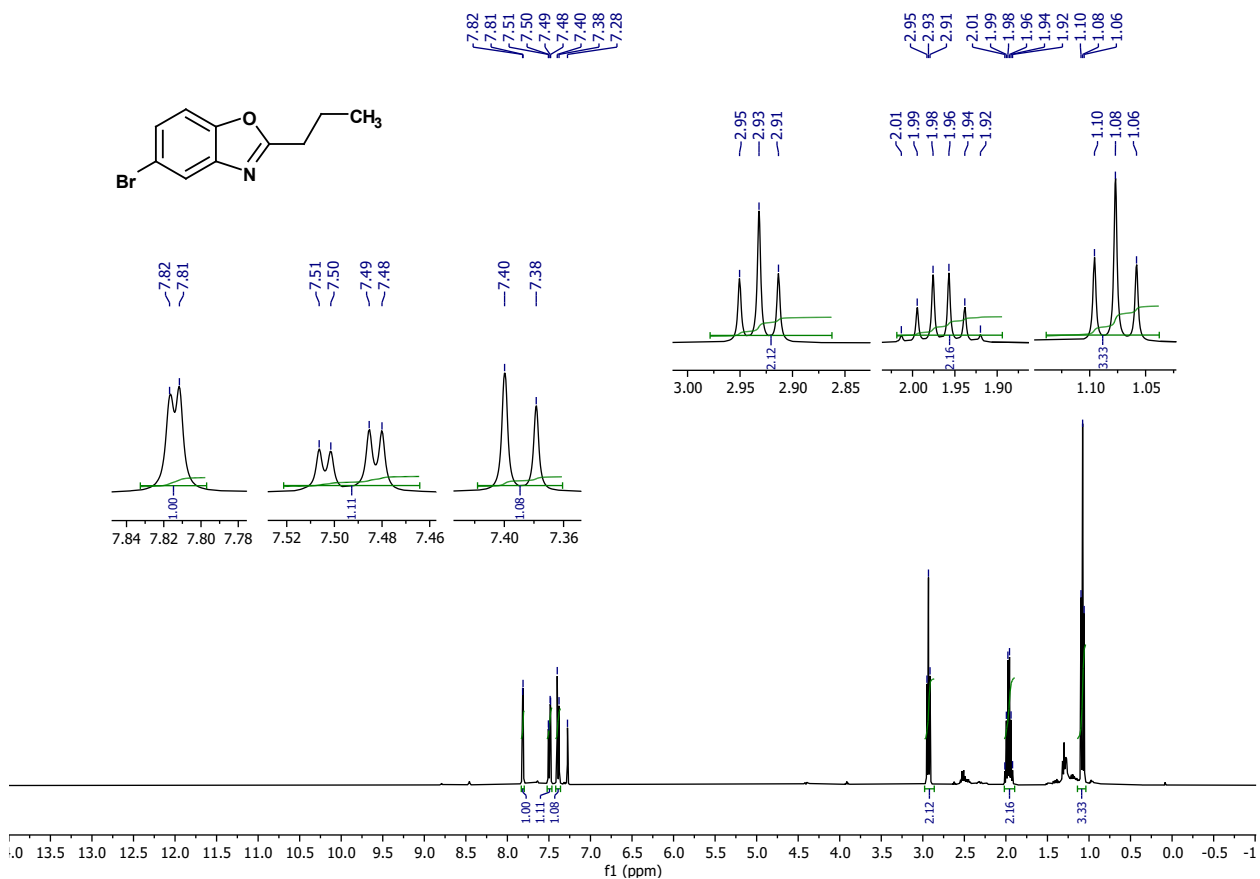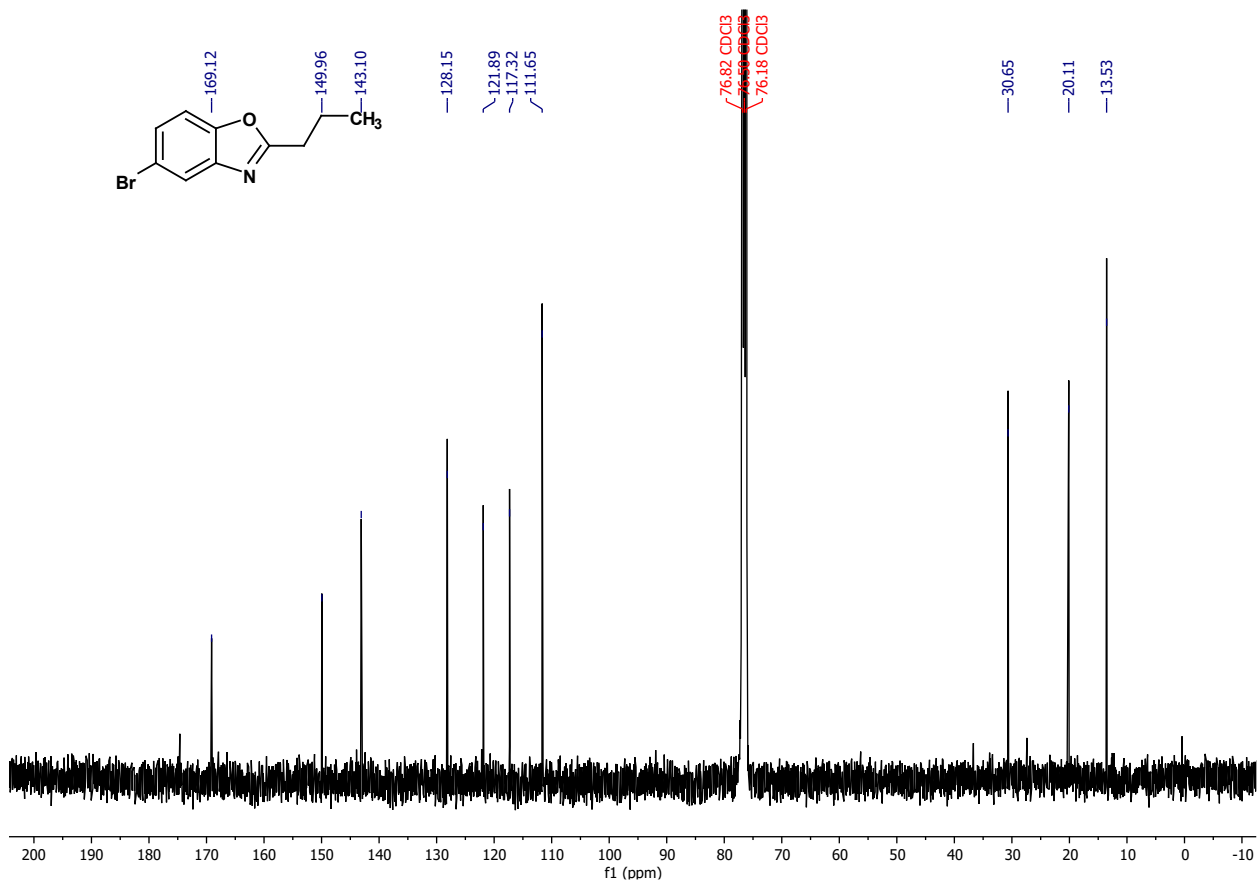

$^1\text{H}$  and  $^{13}\text{C}$  NMR *N*-phenylbutyramide (**4k**)

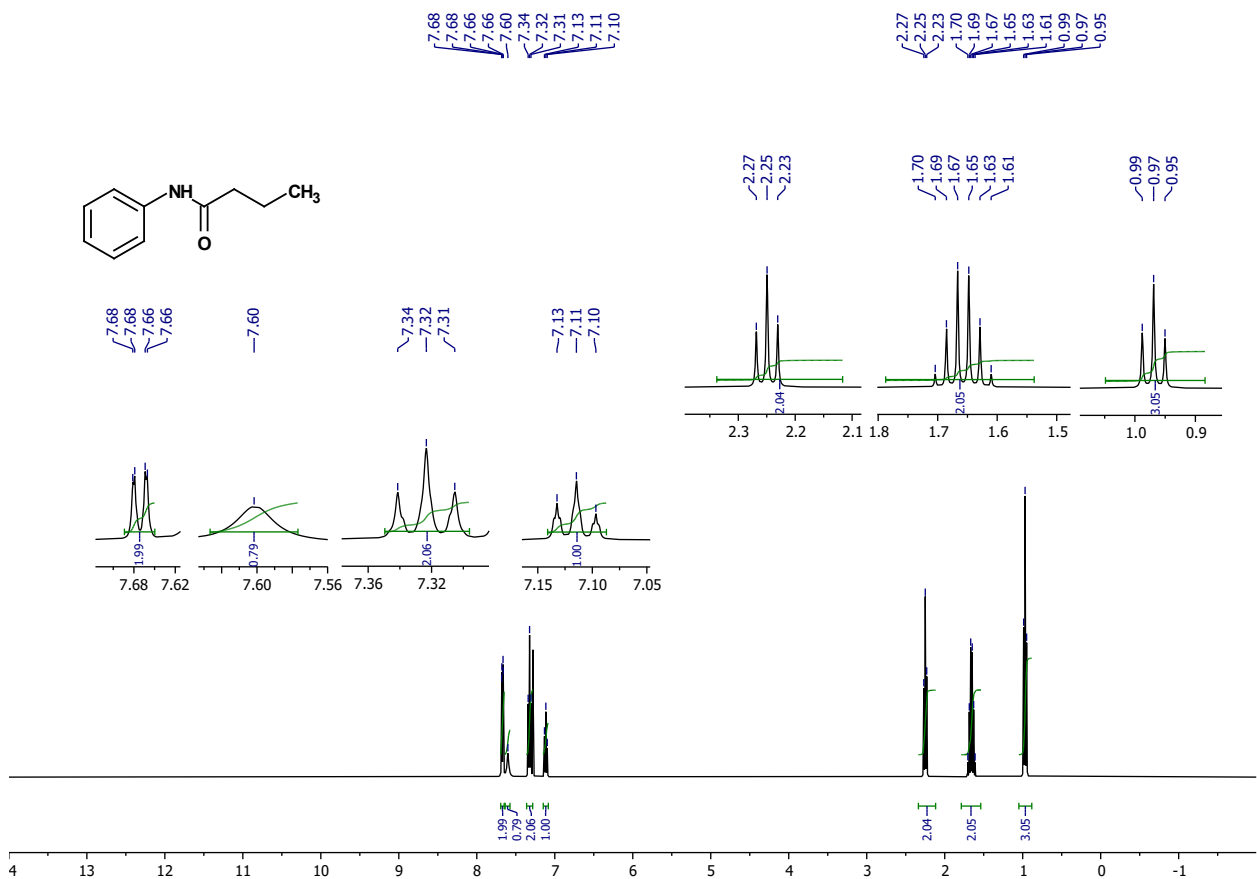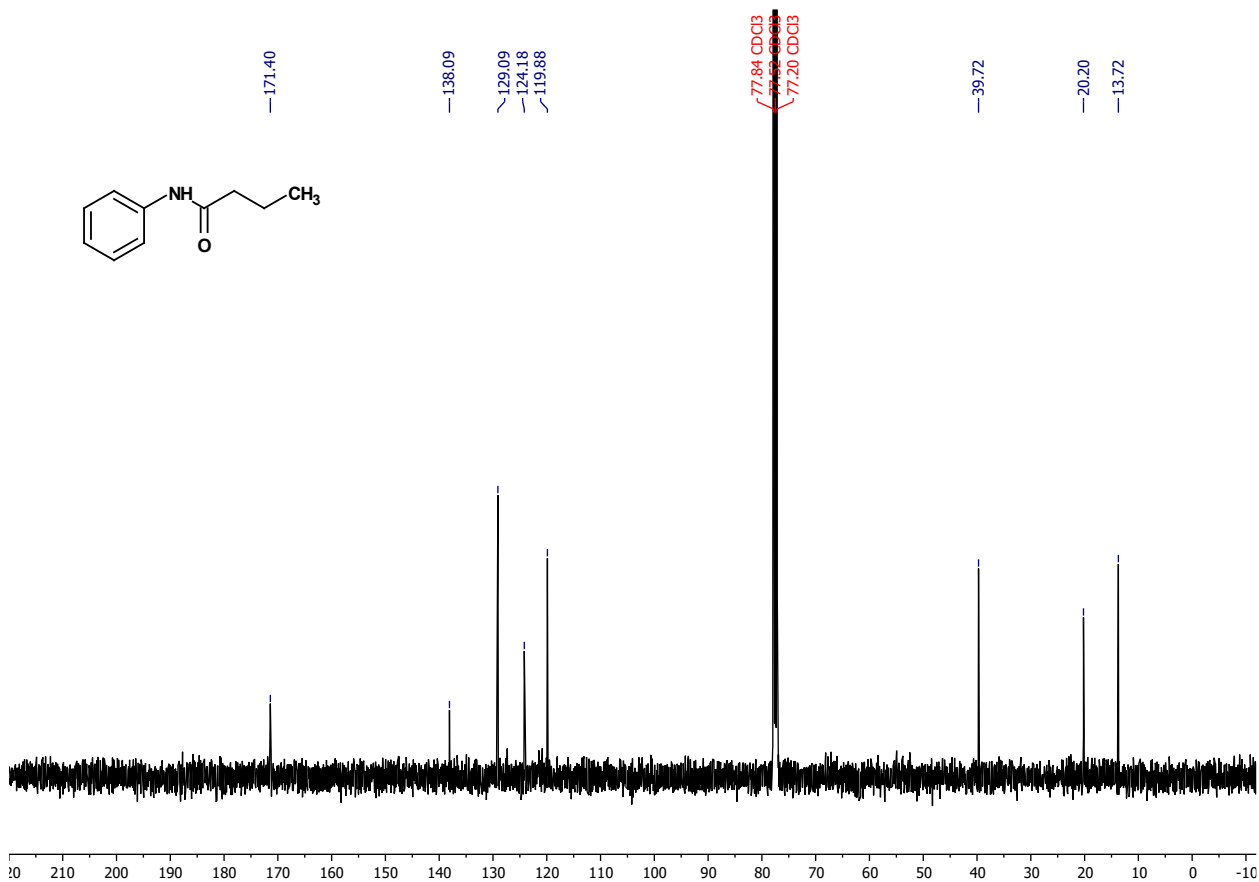



$^1\text{H}$  and  $^{13}\text{C}$  NMR *N*-(2-chloro-5-nitrophenyl)butyramide (**4o**)

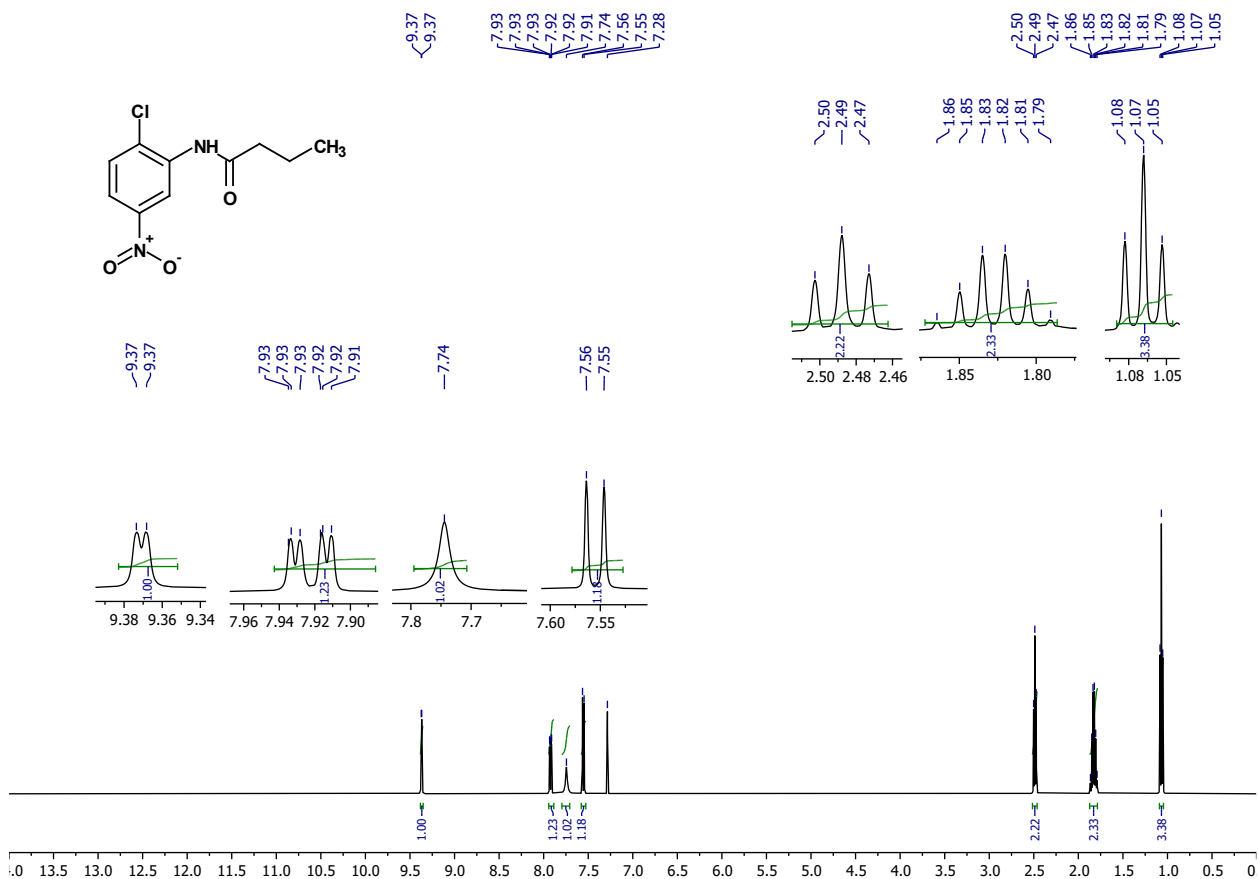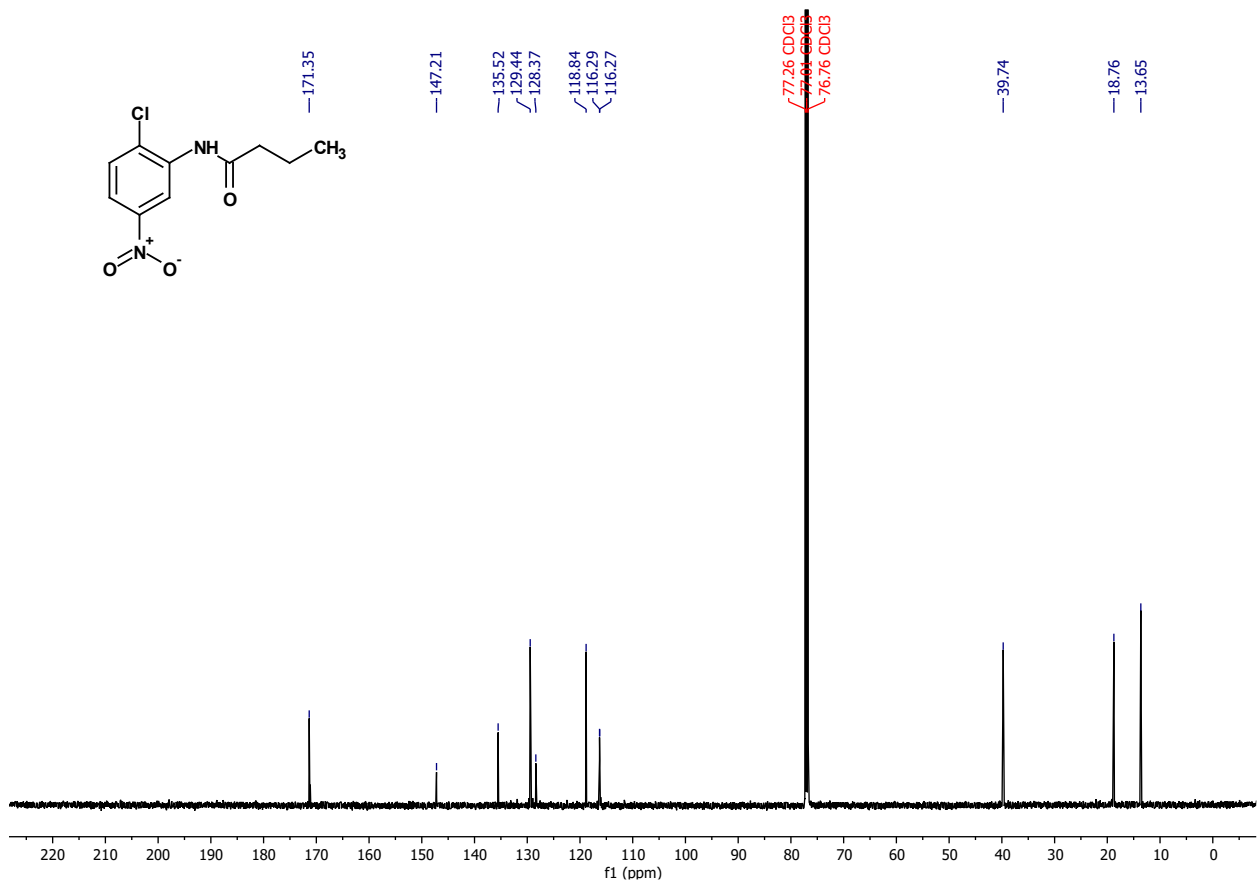

$^1\text{H}$  and  $^{13}\text{C}$  NMR *N*-(2-fluoro-5-nitrophenyl)butyramide (**4p**)

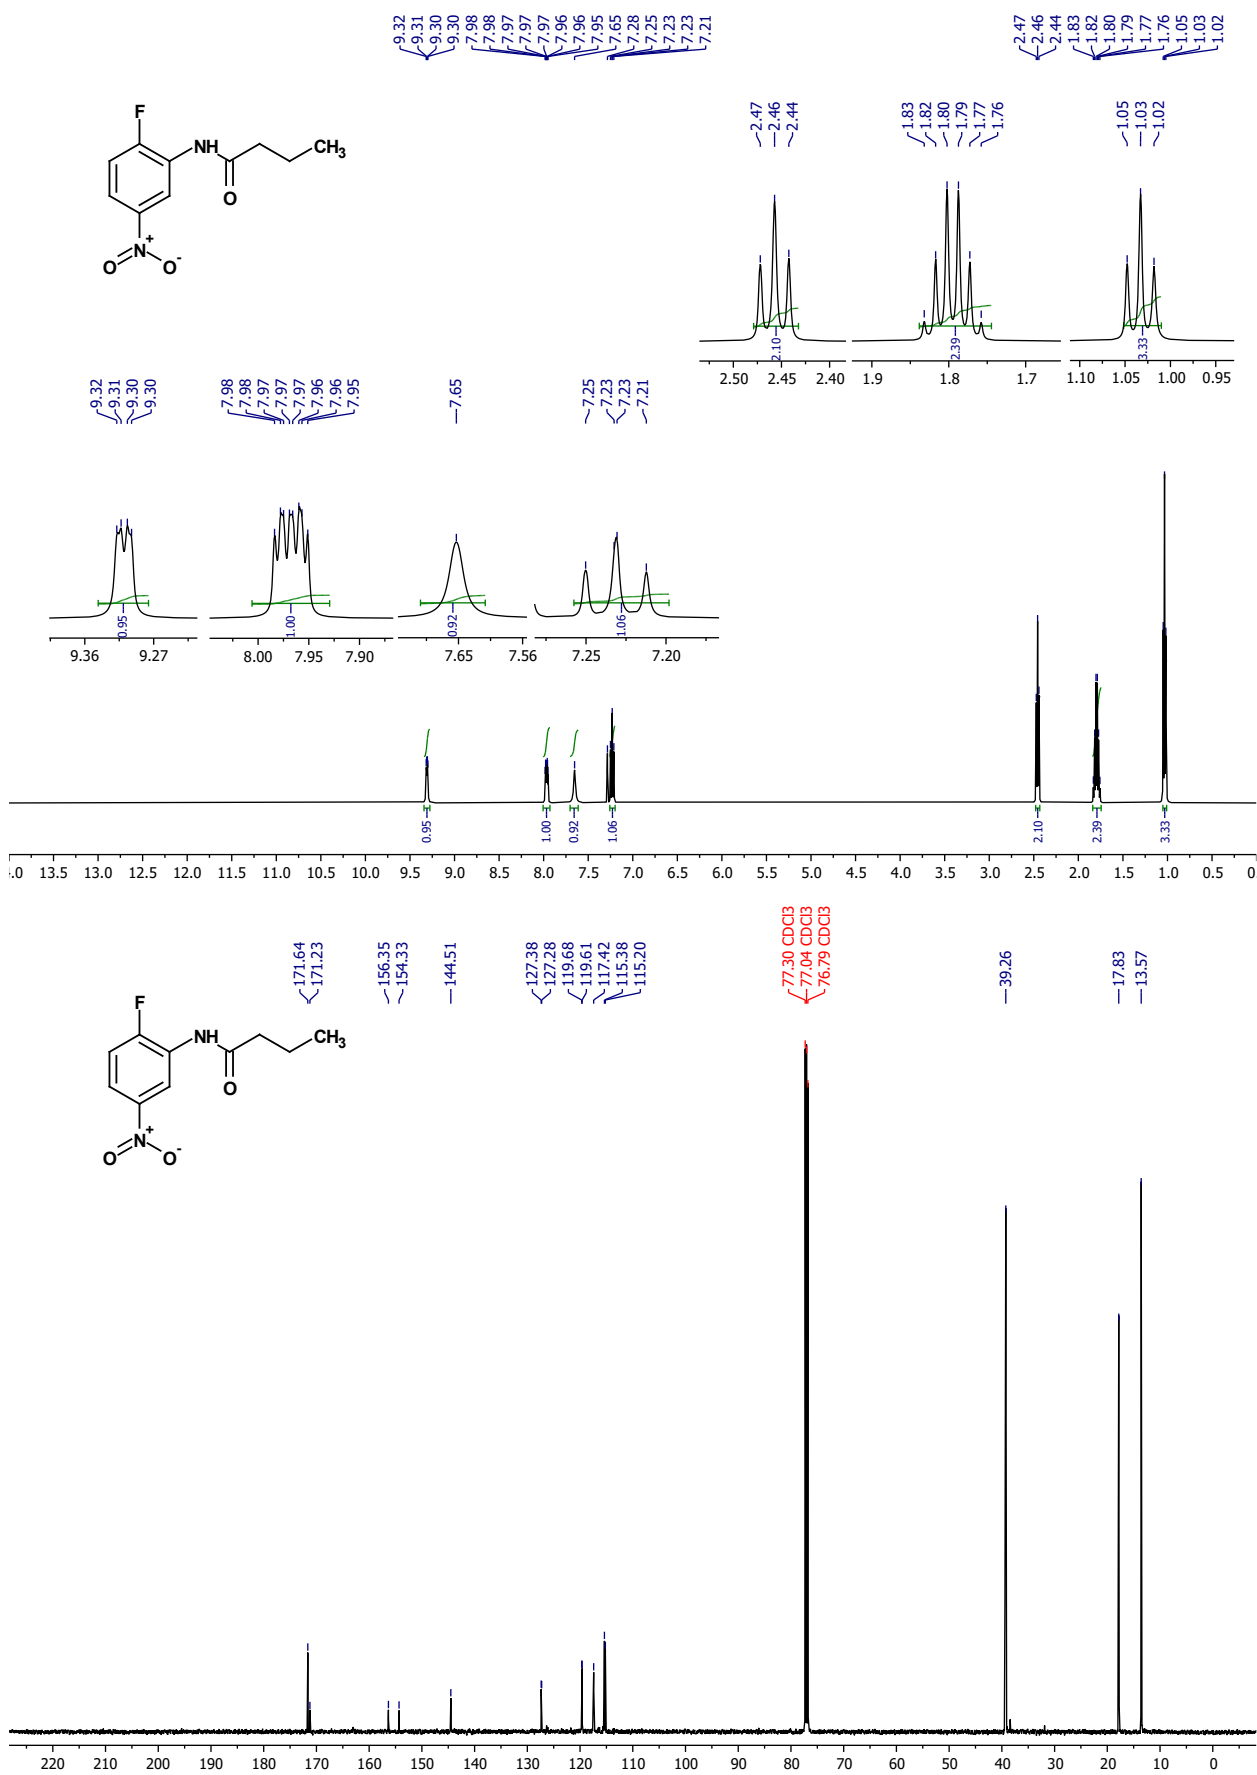

$^1\text{H}$  and  $^{13}\text{C}$  NMR *N*-(4-hydroxy-3,5-dimethylphenyl)butyramide (**4u**)

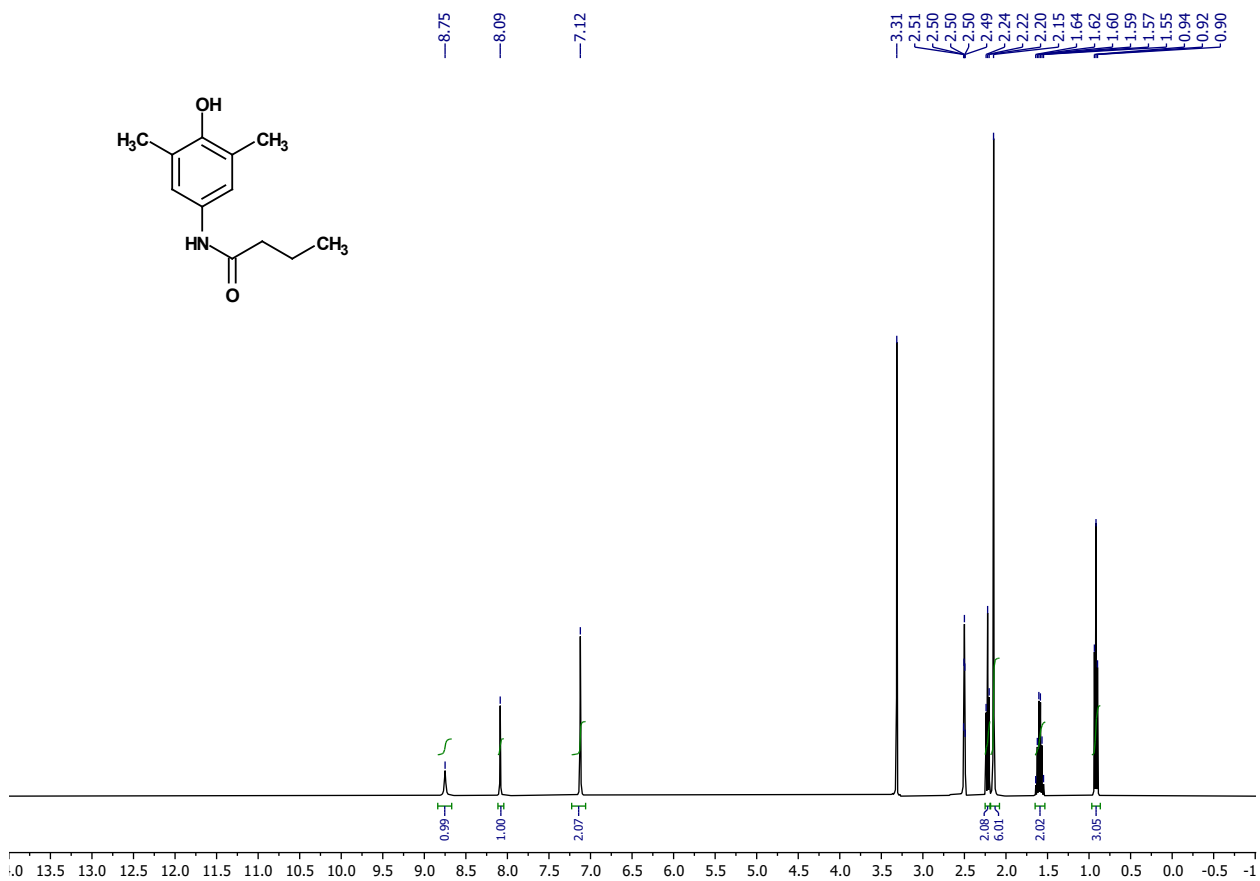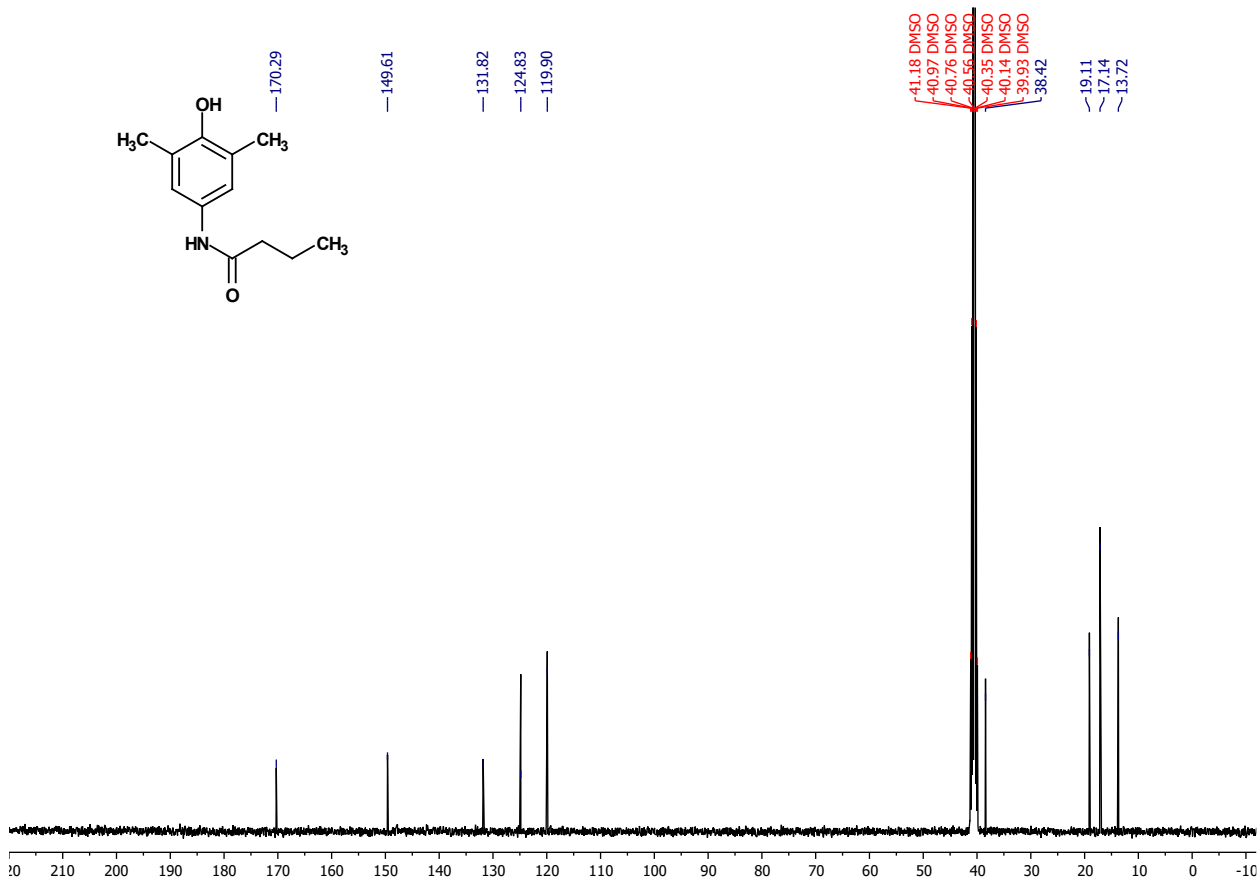

$^1\text{H}$  and  $^{13}\text{C}$  NMR Methyl 5-butylamido-2-hydroxybenzoate (**4w**)

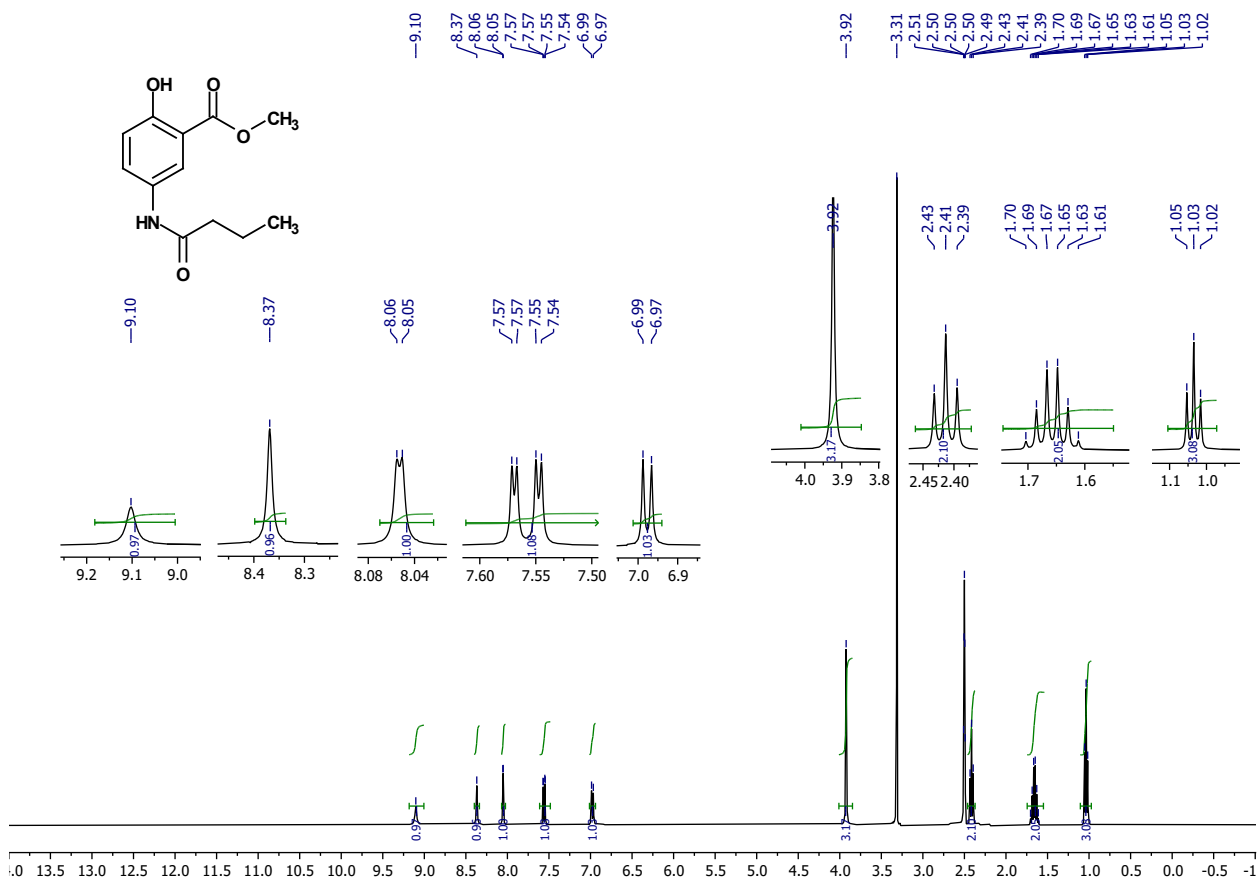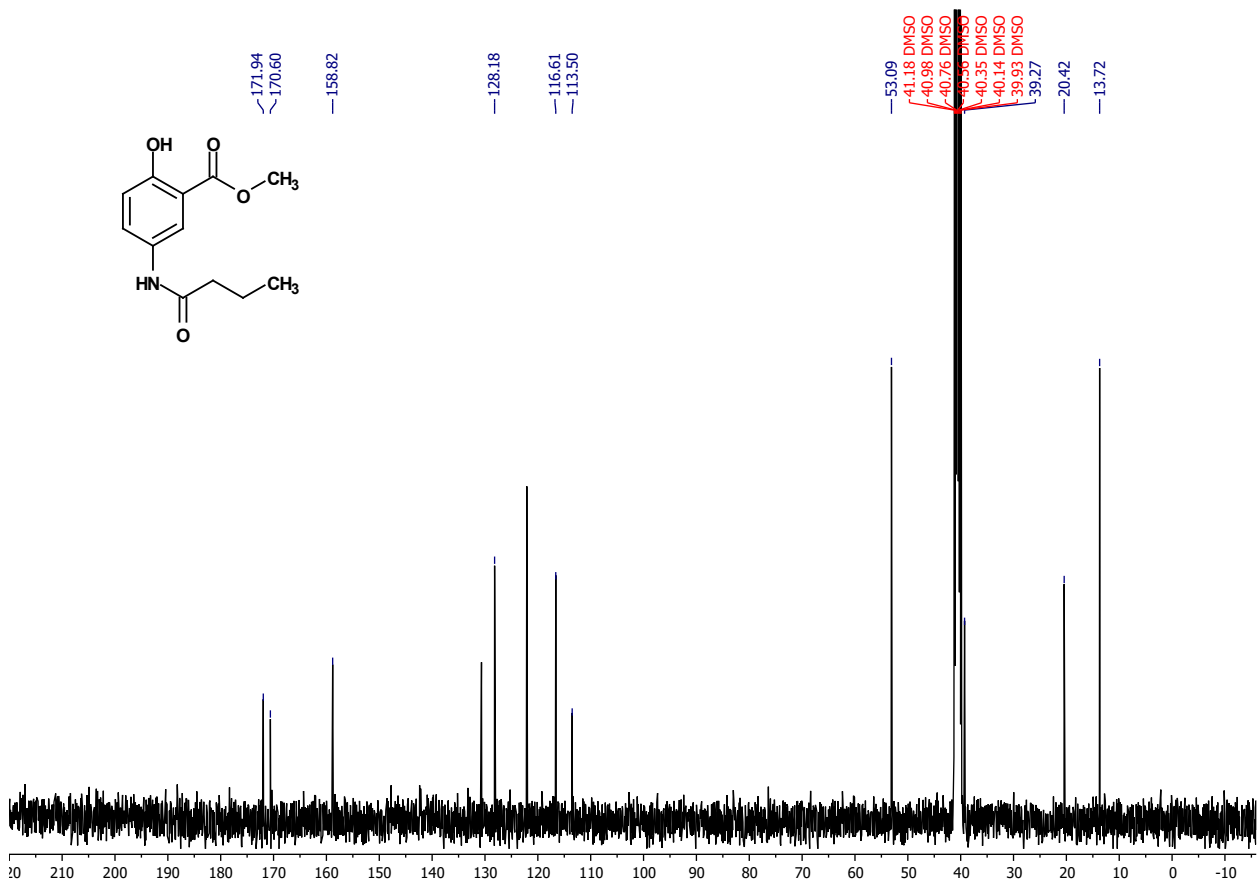

$^1\text{H}$  and  $^{13}\text{C}$  NMR Methyl 2-propylbenzo[d]oxazole-7-carboxylate (**4ww**)

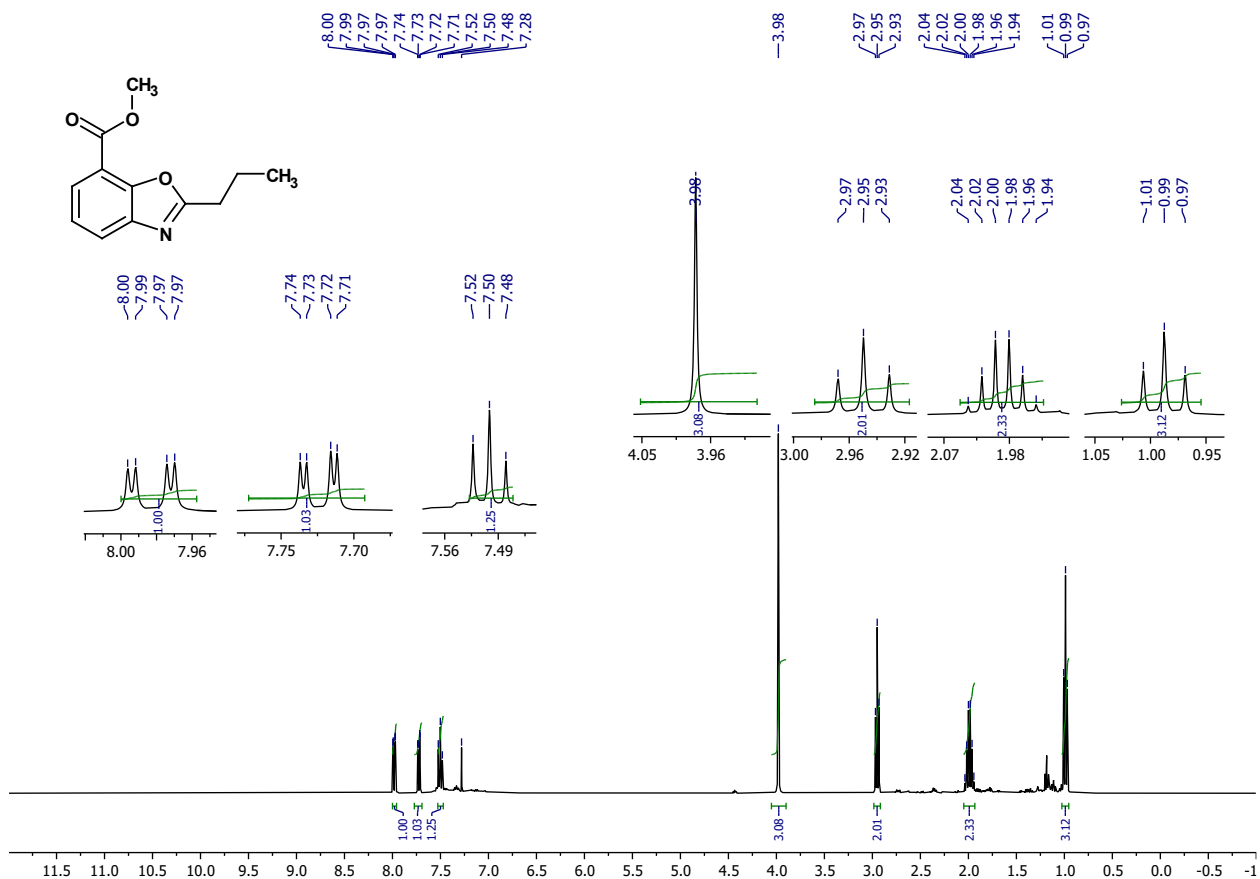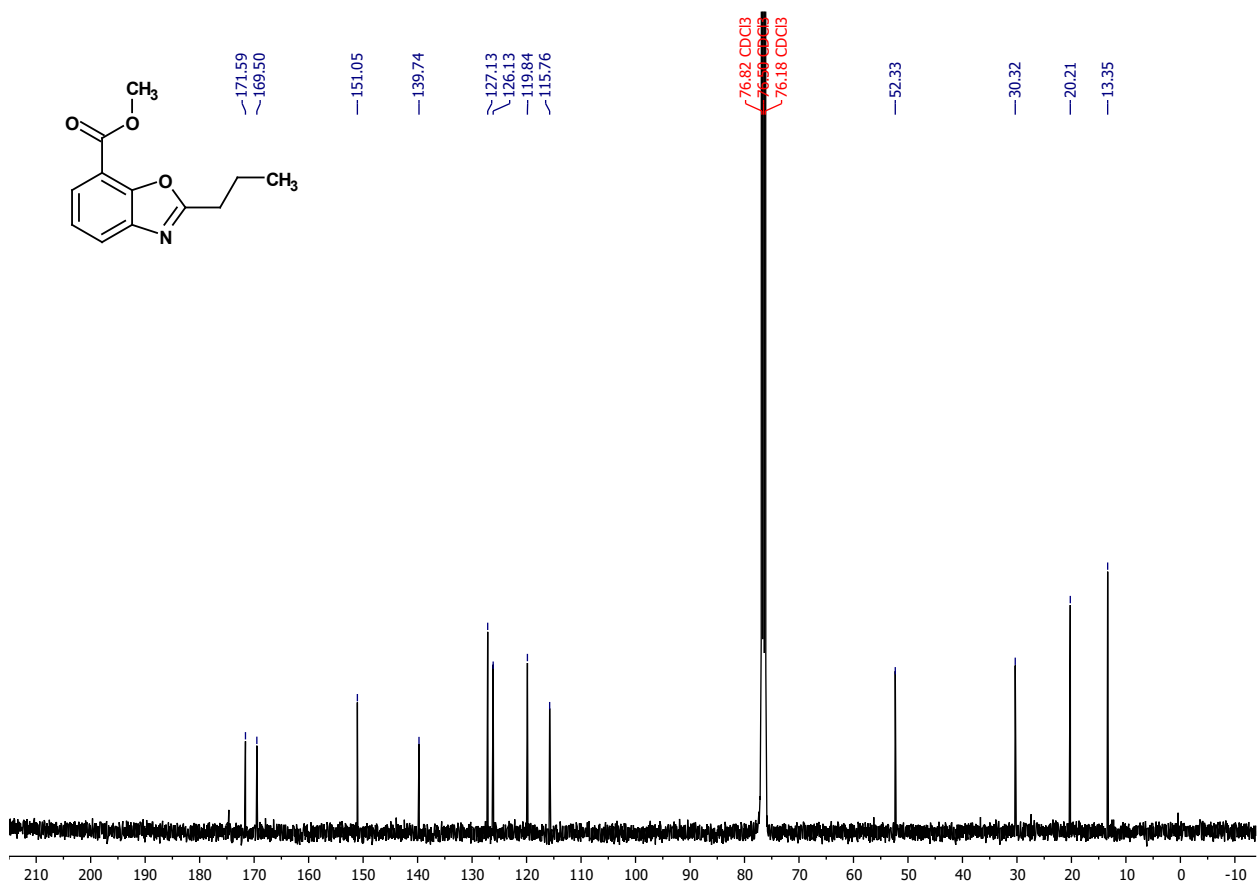

<sup>1</sup>H and <sup>13</sup>C NMR Ethyl 5-butylamido-2-hydroxybenzoate (**4x**)

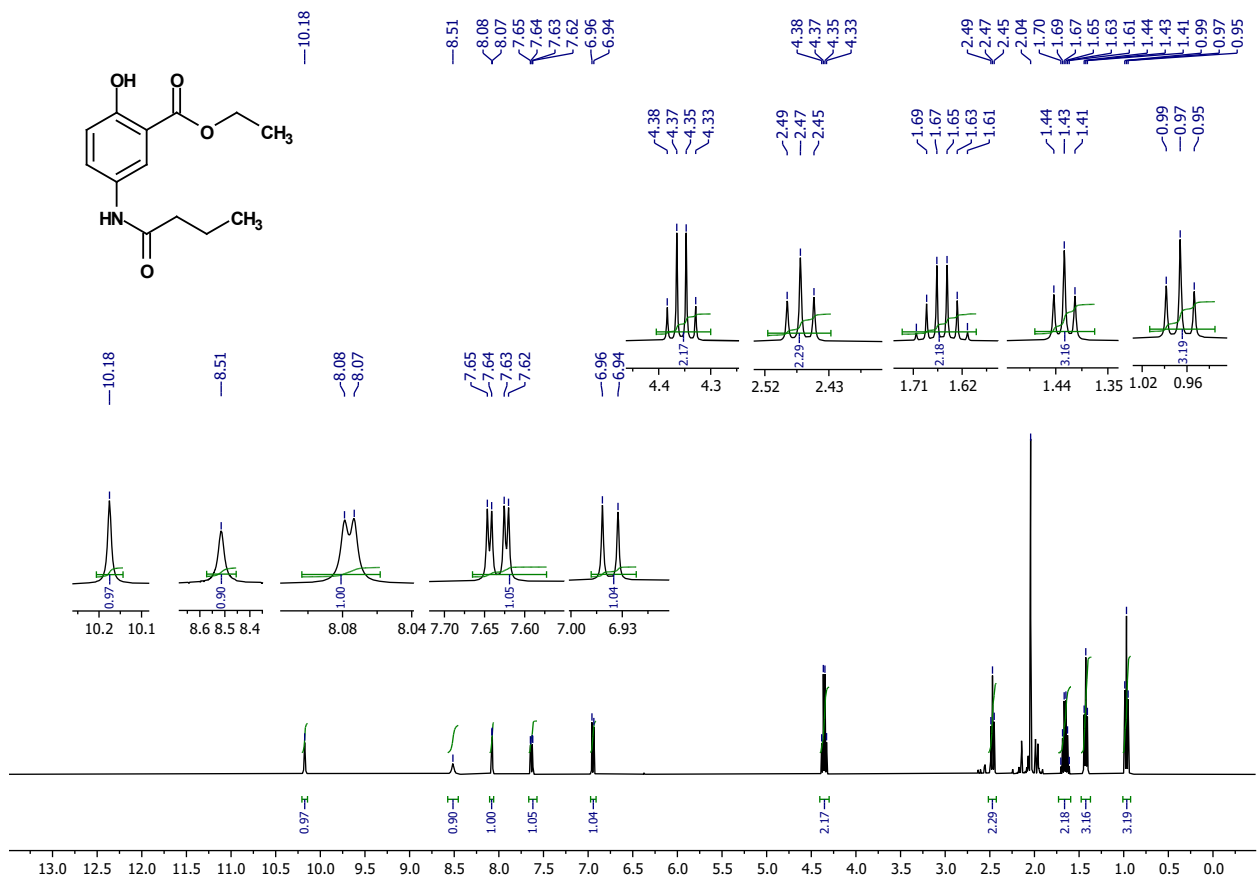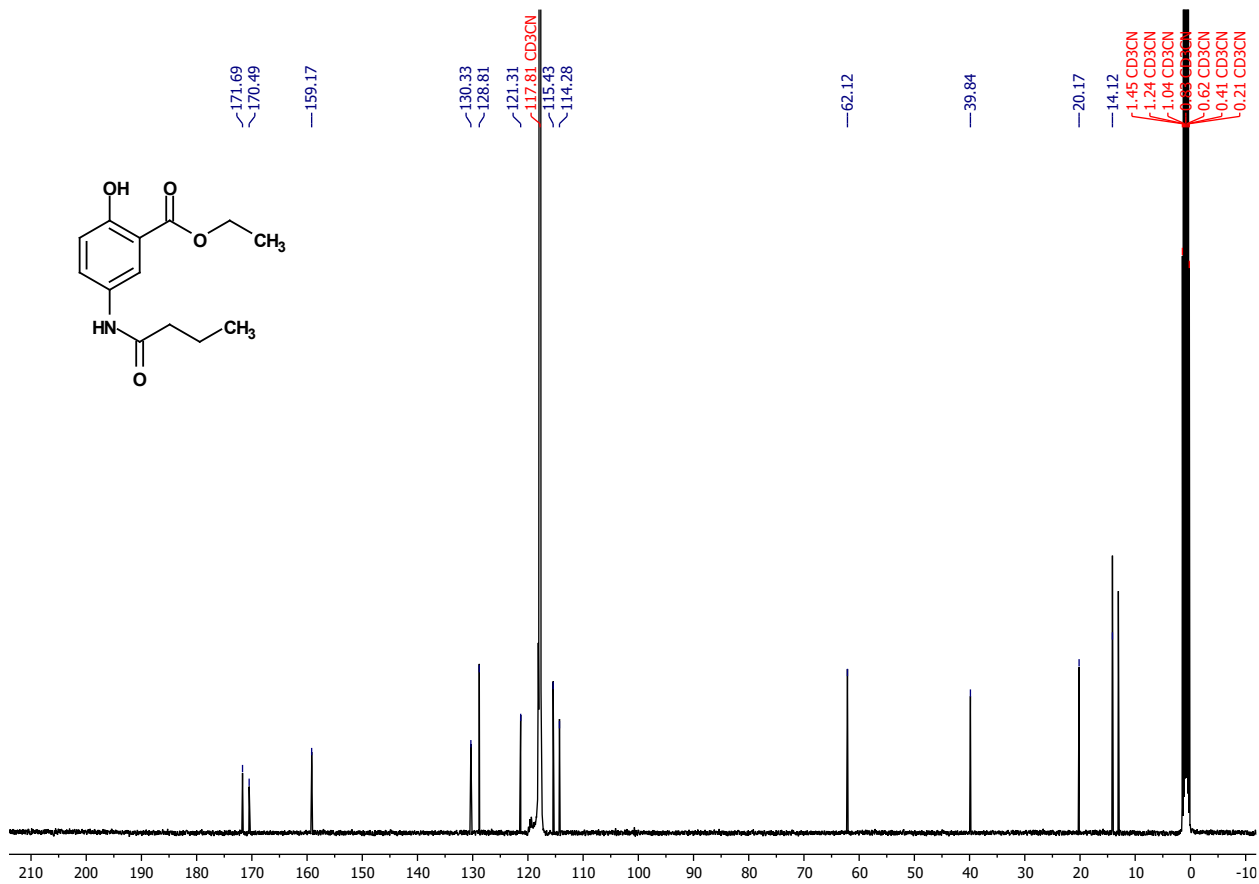

$^1\text{H}$  and  $^{13}\text{C}$  NMR Ethyl 2-propylbenzo[d]oxazole-7-carboxylate (**4xx**)

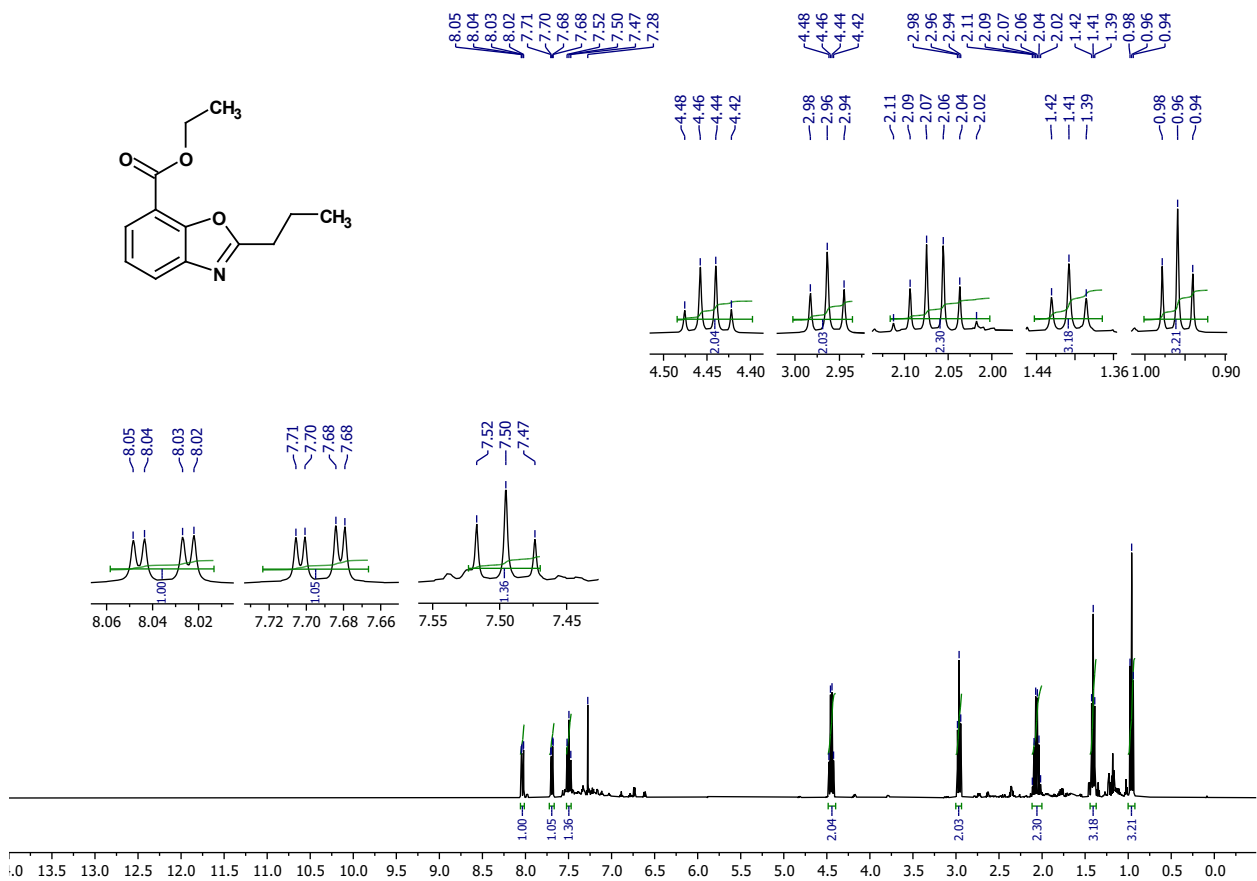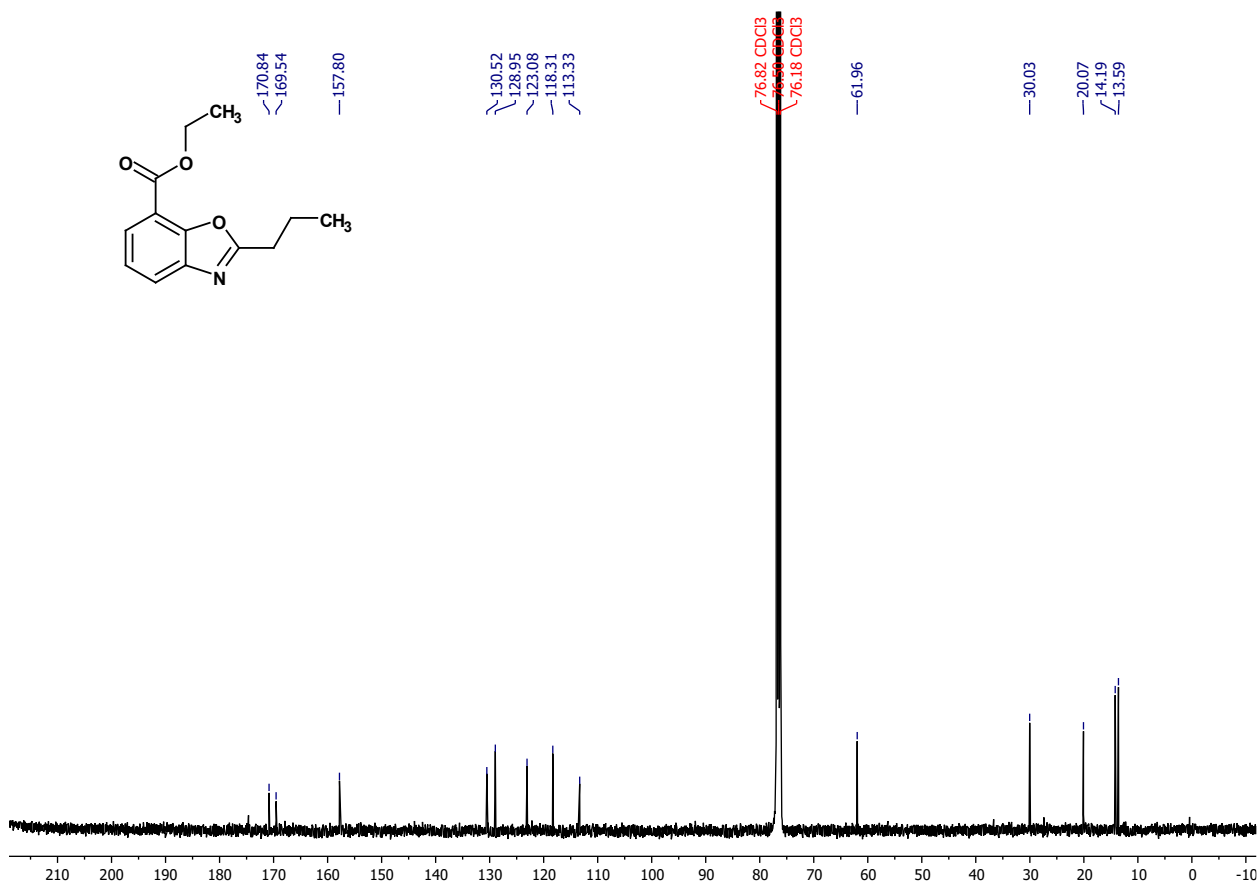

Supplement: d4qo01296h1.pdf [file d4qo01296h1.pdf]
